# Supplementary material for: Mitochondrial Aconitase ACO2 Links Iron Homeostasis with Tumorigenicity in Non–Small Cell Lung Cancer
Source: Oxford University Press journal article supplement (doi:10.1158/1541-7786.mcr-22-0163), 2022-10-10
Supplement: mcr-22-0163_supplementary_data_1_suppsd1.xlsx [file mcr-22-0163_supplementary_data_1_suppsd1.xlsx]

## Sheet: Summary
Sheets	Desccription
Clinical Info	Clinical Information regarding patients in this cohort
52 Patient Proteome	Total proteome Light vs Heavy
BEAS-2B Proteome	Total Proteome Log2
H226 In Vitro Proteome	Total Proteome Log2
H226 In Vivo Proteome	Total Proteome Log2

## Sheet: Clinical Info
PHLC ID	Engraftability	Histology	Sex	Smoking Status
PHLC85	XG	LUSC	M	Ever
PHLC55	XG	LUSC	M	Ever
PHLC16	XG	LUSC	F	Ever
PHLC152	XG	LUSC	M	Ever
PHLC162	XG	LUSC	F	Ever
PHLC193	XG	LUSC	M	Ever
PHLC62	XG	LUSC	M	Ever
PHLC200	XG	LUSC	F	Ever
PHLC6	XG	LUSC	M	Ever
PHLC139	XG	LUSC	M	Ever
PHLC115	XG	LUSC	F	Ever
PHLC50	XG	LUSC	M	Ever
PHLC149	XG	LUSC	M	Ever
PHLC57	XG	LUSC	M	Ever
PHLC27	XG	LUSC	M	Ever
PHLC113	XG	LUSC	M	Ever
PHLC87	XG	LUSC	F	Ever
PHLC86	XG	LUSC	M	Ever
PHLC123	XG	LUSC	M	Ever
PHLC198	XG	Pleomorphic ca with LUSC component	M	Ever
PHLC134	XG	Pleomorphic ca with LUAD component	M	Ever
PHLC182	XG	ADSQ	M	Ever
PHLC117	XG	LUAD	M	Ever
PHLC154	XG	LUAD	M	Ever
PHLC22	XG	LUAD	M	Ever
PHLC81	XG	LUAD	F	Never
PHLC196	XG	LUAD	M	Ever
PHLC153	XG	LUAD	M	Ever
PHLC111	XG	LUAD	M	Ever
PHLC175	Non-XG	LUSC	F	Ever
PHLC20	Non-XG	LUSC	F	Ever
PHLC144	Non-XG	LUSC	F	Ever
PHLC107	Non-XG	LUSC	M	Ever
PHLC66	Non-XG	LUSC	M	Ever
PHLC121	Non-XG	LUSC	M	Ever
PHLC131	Non-XG	LUAD	M	Ever
PHLC150	Non-XG	LUAD	F	Ever
PHLC174	Non-XG	LUAD	F	Never
PHLC124	Non-XG	LUAD	M	Ever
PHLC53	Non-XG	LUAD	F	Ever
PHLC96	Non-XG	LUAD	F	Ever
PHLC7	Non-XG	LUAD	F	Ever
PHLC59	Non-XG	LUAD	M	Ever
PHLC21	Non-XG	LUAD	F	Ever
PHLC15	Non-XG	LUAD	F	Ever
PHLC109	Non-XG	LUAD	F	Ever
PHLC127	Non-XG	LUAD	M	Ever
PHLC17	Non-XG	LUAD	F	Ever
PHLC125	Non-XG	LUAD	M	Ever
PHLC11	Non-XG	LUAD	M	Ever
PHLC105	Non-XG	LUAD	F	Never
PHLC10	Non-XG	LUAD	M	Ever

## Sheet: 52 Patient Proteome
PHLC85	PHLC55	PHLC16	PHLC152	PHLC162	PHLC193	PHLC62	PHLC200	PHLC6	PHLC139	PHLC115	PHLC50	PHLC149	PHLC57	PHLC27	PHLC113	PHLC87	PHLC86	PHLC123	PHLC198	PHLC134	PHLC182	PHLC117	PHLC154	PHLC22	PHLC81	PHLC196	PHLC153	PHLC111	PHLC175	PHLC20	PHLC144	PHLC107	PHLC66	PHLC121	PHLC131	PHLC150	PHLC174	PHLC124	PHLC53	PHLC96	PHLC7	PHLC59	PHLC21	PHLC15	PHLC109	PHLC127	PHLC17	PHLC125	PHLC11
NaN	NaN	0.693481	2.92612	NaN	NaN	NaN	0.154478	0.825219	7.30087	1.34486	NaN	NaN	0.360101	NaN	NaN	NaN	0.461042	3.29913	NaN	NaN	NaN	NaN	NaN	NaN	0.194318	1.41497	NaN	1.95114	0.0977804	0.822436	0.799361	NaN	0.187857	NaN	NaN	NaN	NaN	NaN	0.0848968	NaN	0.316296	NaN	0.163023	NaN	NaN	0.165123	NaN	NaN	0.460702
6.87002	3.16086	11.7566	5.86682	1.50832	13.7097	1.48617	6.00096	2.10062	4.22601	8.38223	1.31608	8.85818	7.77121	13.8835	31.7692	0.501328	1.77683	3.98391	26.3089	0.437522	0.794534	0.52154	2.81073	2.40523	3.02453	15.8816	0.75884	0.533817	15.1284	4.09903	0.794218	4.33896	0.225433	8.73744	0.528821	0.494266	1.35984	0.266837	0.454918	0.518511	1.24316	0.465831	0.802118	0.185278	0.147217	1.09867	0.241353	0.290023	1.25073
2.93427	0.419534	0.6054	5.84385	0.50015	1.52221	1.25081	1.15882	0.739153	2.36502	0.744935	11.3234	2.88534	1.41471	1.82502	2.20303	0.544158	2.30335	0.778331	1.68925	0.341029	0.725374	0.15198	0.393499	0.3803	0.547645	0.515437	0.209218	1.73677	1.58574	3.35852	1.53057	1.10223	0.416632	0.699545	0.37942	0.336349	0.349956	0.324686	0.402917	0.242854	0.458148	0.409735	0.723327	0.21302	0.124143	0.179311	0.141321	0.250282	0.621041
6.8334	NaN	NaN	NaN	NaN	NaN	12.5508	7.53693	NaN	NaN	NaN	NaN	18.7343	10.715	NaN	NaN	NaN	NaN	11.3625	NaN	NaN	NaN	8.08473	10.5008	NaN	NaN	NaN	12.1816	NaN	NaN	NaN	NaN	NaN	0.375066	5.41624	NaN	4.32676	NaN	8.06842	NaN	NaN	NaN	NaN	NaN	5.52853	0.904159	NaN	NaN	NaN	0.0117452
0.703383	0.305857	0.562936	1.68515	0.570841	0.410492	0.777001	0.481533	0.243926	0.944822	1.02051	0.769823	0.366354	0.793714	0.75375	2.27361	0.628259	0.422797	0.992359	2.24411	1.29975	0.591191	0.167799	0.628536	0.529661	0.47957	0.865202	0.336973	1.67381	0.877655	0.35886	0.429129	0.458421	0.296551	0.167482	0.108646	0.100929	NaN	0.230835	0.257301	NaN	0.298695	0.429886	0.359299	0.434443	0.220041	0.269564	0.187589	0.0760803	0.701017
23.2704	NaN	NaN	NaN	NaN	103.972	24.1657	67.6315	22.4457	NaN	16.1608	14.6156	60.0492	32.6467	72.722	NaN	11.5378	NaN	9.61723	23.7175	NaN	15.672	21.1144	NaN	NaN	51.0725	NaN	17.7882	NaN	51.2873	24.9682	NaN	12.5777	12.566	9.15081	NaN	13.871	NaN	NaN	10.8883	NaN	16.6389	0.964134	15.0507	12.3765	8.80437	NaN	13.1235	NaN	NaN
0.599413	0.333678	0.569573	0.520833	0.218202	2.23504	0.325945	0.307522	0.24233	0.381781	0.105248	0.38279	1.91197	0.61282	0.646705	1.70216	0.158962	0.380098	0.175525	0.937559	0.285641	0.60361	0.0828089	0.21139	0.263179	0.221523	0.186047	0.129021	0.21966	0.350816	0.350791	0.29761	0.21004	0.193073	0.249775	0.21378	0.172348	0.123804	0.201203	0.150435	0.133752	0.459369	0.189032	0.306645	0.192463	0.0989609	0.22778	0.0943218	0.24561	0.229337
0.628141	0.503246	4.74293	1.07388	0.723327	NaN	1.09707	0.777847	0.713878	0.701213	0.64834	1.09422	1.11457	NaN	1.20877	0.710782	0.787588	0.646412	1.21415	1.90745	0.873744	NaN	0.528429	0.775014	10.1439	NaN	0.688231	0.540073	1.02875	0.742776	1.28317	0.666978	0.506457	0.814996	NaN	0.365257	0.342677	NaN	0.499301	NaN	0.607644	NaN	NaN	0.382146	0.694059	0.495148	0.588547	NaN	0.494927	NaN
14.0298	24.3748	52.0481	26.2054	32.0143	33.9317	20.1963	27.1887	27.0878	55.7258	13.6866	19.4375	52.9885	38.9469	14.1331	7.00427	8.50629	NaN	23.0425	43.7867	NaN	15.3233	11.4481	31.4554	209.842	14.9826	22.6122	16.0203	7.48503	10.7513	14.08	3.83039	29.7336	17.5049	16.7735	NaN	13.8696	17.2753	9.39673	7.82289	16.5799	47.23	10.7894	14.8595	8.85426	5.09606	8.64753	4.49035	14.9591	6.18927
3.95273	9.94332	3.04934	10.7164	1.07411	0.774713	NaN	1.69259	1.64761	1.71107	1.94674	1.82652	2.12292	1.58035	2.70227	6.12445	2.19068	6.92905	2.13771	4.70566	2.08164	9.10747	1.26137	NaN	NaN	3.18634	1.47206	0.806322	1.61946	1.20237	2.97655	4.03942	1.05075	0.981162	2.54492	NaN	0.665203	0.50005	1.01088	2.04445	1.46671	NaN	0.88269	1.16056	NaN	1.36077	0.824402	1.63596	NaN	0.881213
0.439001	0.278715	0.232791	0.458968	0.154842	1.18427	0.218355	0.178721	0.0866101	0.527705	0.270512	0.187161	0.746659	0.505919	0.462406	1.86808	0.490725	0.314951	0.110892	0.72124	0.147852	0.561798	NaN	0.0778816	0.166345	0.156558	0.10633	0.101807	0.256654	0.312042	0.187733	0.147195	0.39268	0.105689	0.189847	0.125185	NaN	0.136166	0.120282	0.12104	0.0951837	0.318806	0.0667245	0.224967	0.160743	0.0504109	0.806842	0.0667512	0.135676	0.114547
0.495835	0.637308	0.669434	0.87581	3.35087	0.849473	0.85419	0.559691	0.790701	1.34347	3.5057	0.790952	1.12222	0.618353	0.759763	3.1347	4.14576	0.738935	4.64059	0.733514	0.508208	0.534902	0.454752	0.230065	0.778574	0.445157	0.616751	0.738771	3.28612	0.944287	1.17034	0.692665	1.06578	1.44227	0.616333	0.217946	0.129549	0.521132	0.349394	0.301205	0.457834	0.44119	0.820412	0.482719	0.488138	0.261404	0.397978	0.607054	0.474586	0.594389
0.769645	0.300888	0.479111	1.4029	0.659674	0.400737	0.345351	0.286475	0.389029	1.55176	0.347391	0.393747	2.19964	0.642921	1.07124	1.57082	0.441404	0.956663	0.733999	0.554723	0.695943	0.675858	NaN	0.545673	NaN	0.413428	0.372245	NaN	0.685401	0.472054	0.387717	0.331115	0.263588	0.259558	1.06138	0.108359	0.165319	0.381883	0.311439	0.193904	0.660589	0.308252	0.0875197	0.141758	0.40077	0.124782	0.128522	0.179073	0.29723	0.638978
0.389363	0.286607	0.304025	0.847386	0.488567	0.262034	0.50025	0.413121	0.299904	0.647375	0.473015	0.537201	0.29536	0.332182	0.558129	0.839278	0.674218	0.560727	0.666978	0.793777	0.729288	0.231385	0.136977	0.355568	0.399058	0.589379	0.801925	0.217737	1.89086	0.267537	0.540219	0.431816	0.149325	0.304999	0.268579	0.26639	0.202077	0.196703	0.300625	0.203799	0.270059	0.188886	0.220946	0.353895	0.263352	0.0911743	0.216769	0.140562	0.138941	0.387702
0.882379	0.671096	0.357488	1.24253	0.87146	NaN	0.625508	NaN	0.981547	NaN	1.55943	0.74599	NaN	0.68334	NaN	NaN	2.22941	NaN	2.50088	0.75683	NaN	NaN	0.859845	0.503525	0.706115	0.696767	NaN	NaN	2.17349	NaN	NaN	NaN	0.457561	NaN	NaN	NaN	0.458968	NaN	0.60584	NaN	0.311575	NaN	NaN	NaN	NaN	0.531124	NaN	0.720357	NaN	NaN
1.08718	NaN	NaN	1.06381	2.54822	0.343572	NaN	NaN	1.09217	1.99736	1.29676	1.32231	1.40954	NaN	0.988631	1.07995	2.96718	3.07286	1.88441	NaN	NaN	NaN	0.594707	NaN	NaN	1.06671	1.08591	NaN	2.8439	NaN	0.658631	0.738825	NaN	NaN	NaN	NaN	NaN	NaN	NaN	0.702543	0.592768	NaN	NaN	0.667423	0.96367	0.720409	NaN	NaN	0.643915	NaN
1.41685	0.26559	0.531802	1.70088	0.83682	0.65634	1.25491	1.11688	0.48499	1.23062	0.966277	0.823316	0.516102	0.513795	0.833125	1.07513	1.54717	0.772857	2.12721	1.19208	0.76746	0.38072	0.427369	0.371581	0.454071	0.42878	0.389029	0.307825	4.73732	0.616295	1.53323	0.721449	0.939761	0.965437	0.106307	0.199183	0.247752	0.257905	0.427972	0.270453	0.234896	0.353058	0.598516	0.292218	0.385149	0.154964	0.393747	0.189251	0.174143	0.972006
1.52423	4.52039	1.75064	3.34001	NaN	0.795102	2.19399	1.53889	0.868282	NaN	2.06334	8.18063	1.29539	1.28451	NaN	3.04562	0.465181	1.34582	1.88633	3.26147	NaN	3.71278	NaN	9.32053	0.896379	1.8005	1.31038	0.715256	0.623441	4.04089	3.41402	1.13586	0.438597	NaN	1.28479	1.10401	1.60733	0.766225	0.559284	1.20734	0.944644	NaN	0.524246	1.19002	0.75861	0.633272	1.30649	NaN	0.874279	NaN
NaN	NaN	NaN	0.756315	NaN	NaN	NaN	0.669299	1.13706	NaN	NaN	1.83628	NaN	NaN	2.06778	2.85837	2.40252	1.00445	1.21954	0.758093	0.782167	NaN	NaN	NaN	1.31858	NaN	NaN	0.44958	1.15354	0.440315	NaN	0.546627	NaN	0.6595	NaN	NaN	NaN	NaN	NaN	0.719942	0.543774	NaN	NaN	1.20562	0.526926	NaN	0.743771	0.610874	0.839067	0.634357
1.22235	0.477395	0.556824	1.50553	0.755629	0.547945	0.941265	0.932053	0.442126	1.10231	1.03114	0.797957	0.631592	0.594566	0.831532	1.03416	1.45119	0.705169	1.95202	1.0818	0.756773	0.293161	0.357718	0.450958	0.473238	0.463027	0.411624	0.285494	4.88567	0.557973	1.47811	0.734484	0.860733	0.800064	0.0390671	0.148498	0.249925	0.202081	0.389408	0.197981	0.341822	0.31052	0.574812	0.288176	0.501882	0.0921659	0.338421	0.308718	0.300156	0.991572
1.76616	0.310174	0.708717	1.92104	1.07093	0.690799	0.93668	1.14611	0.591191	1.19197	1.06316	0.833056	0.714847	0.578469	0.964413	1.21093	1.65068	0.767578	2.38669	1.44088	0.896781	0.342021	0.349455	0.389393	0.467333	0.50025	0.377729	0.336214	5.53557	0.629683	1.69834	0.804117	1.06604	1.17679	0.213179	0.180106	0.260777	0.333968	0.34987	0.36135	0.287414	0.480008	0.488496	0.379061	0.492247	0.154538	0.380431	0.195906	0.167884	1.15198
0.735186	0.608939	0.964041	0.909422	0.199808	1.88558	0.395444	0.446449	0.402739	1.03808	1.29415	0.93362	2.84503	1.25197	1.68062	0.935366	0.378143	0.509866	0.708717	1.61993	1.19647	1.1278	0.238584	0.374476	0.394602	1.24592	0.704871	0.256772	0.093791	1.19914	0.905305	0.415731	0.436815	0.389939	1.17062	0.581091	0.476417	0.319693	0.575937	0.165226	0.342583	0.469969	0.112797	0.223604	0.350668	0.164671	0.21568	0.183053	0.169546	0.205449
1.29017	0.232851	0.458421	1.8815	0.808931	0.630159	1.0229	0.972195	0.477509	1.18722	0.994233	0.868357	1.03699	0.697058	0.934056	1.09516	1.5122	0.865426	2.09521	1.37206	0.700427	0.30525	0.400609	0.396244	0.545971	0.404285	0.459179	0.326168	6.70601	0.637064	1.76588	0.755059	1.07892	1.22581	0.34343	0.184441	0.231476	0.25125	0.333233	0.223299	0.30977	0.273239	0.663614	0.333957	0.509658	0.13833	0.41295	0.251756	0.154507	1.12188
1.02816	NaN	1.46041	1.75877	0.66921	2.95998	NaN	3.20667	1.03388	0.801989	1.12635	1.4258	0.977613	NaN	1.11115	1.31415	0.972763	0.458421	1.71633	1.55446	1.46109	1.32949	1.04281	NaN	2.71393	0.729767	1.20127	NaN	0.994036	1.40469	1.65747	0.901469	0.615422	0.648046	0.566187	0.494903	NaN	NaN	0.584522	NaN	0.474451	NaN	0.982608	0.808538	NaN	0.225728	1.01578	NaN	0.311711	0.394415
NaN	0.552334	0.578704	NaN	0.369085	0.231331	0.4496	NaN	0.324391	NaN	0.362083	0.4054	NaN	NaN	NaN	NaN	0.64156	NaN	NaN	0.834794	0.771426	NaN	NaN	NaN	NaN	0.494462	NaN	NaN	1.3263	NaN	NaN	NaN	0.290428	0.339351	NaN	NaN	0.325818	NaN	0.269215	NaN	0.178113	NaN	NaN	NaN	NaN	0.220848	NaN	0.475715	NaN	NaN
NaN	NaN	0.234863	NaN	0.927816	NaN	NaN	NaN	0.417711	NaN	0.980584	0.935104	1.02489	0.472701	NaN	1.53097	1.33654	0.988631	1.00599	0.732654	0.824674	0.796495	0.798467	3.6402	0.49955	0.823113	0.646705	NaN	NaN	NaN	NaN	0.748391	0.356366	0.533447	NaN	0.289805	NaN	NaN	0.164614	NaN	NaN	0.176744	0.822165	0.904732	0.397361	0.70279	0.73959	0.506842	NaN	0.456746
0.326691	0.445296	0.258994	0.308395	0.26907	0.304025	0.350226	0.552822	0.359906	0.215146	0.235927	0.203273	0.369454	0.30977	0.278676	0.561514	0.453124	0.31742	0.654579	0.525845	0.547825	0.166475	0.26748	0.231777	0.513268	0.259727	0.211216	0.204411	1.1694	0.275984	0.325013	0.215271	0.26547	0.219587	0.155205	0.141828	0.147595	0.186411	0.207241	0.206612	0.180037	0.194882	0.273075	0.180848	0.267996	0.0784129	0.11707	0.124618	0.107853	0.263394
0.497587	0.500952	0.479662	0.79277	0.607533	0.750356	0.459305	0.626135	0.427698	0.541682	0.621891	0.564748	0.442321	NaN	0.517598	1.10659	0.48883	6.11322	0.783822	0.566861	0.901388	0.417258	0.34943	0.544989	0.630994	0.471098	0.583431	0.868131	0.518941	0.940115	0.520833	0.543449	0.364684	0.469219	0.256746	0.282502	0.34427	0.399632	0.355758	0.335469	0.312081	0.349125	0.313548	0.430626	0.465376	0.295369	0.324265	0.368908	0.414611	0.755744
0.664584	NaN	0.542005	1.0061	0.764117	0.573099	0.288984	0.819269	NaN	0.772738	0.740083	0.523177	0.512321	0.422672	0.413856	0.548847	1.23053	0.537634	1.28728	0.693049	1.58612	0.909173	0.398438	NaN	0.326158	0.32699	0.38506	0.626409	0.81011	0.379233	0.70502	0.375587	0.354145	0.187667	0.336757	0.231064	0.244147	0.479295	0.554262	0.231862	0.244804	0.32374	0.410627	0.349321	0.32937	0.240263	0.192153	0.753466	0.386623	0.531773
17.4417	22.989	NaN	NaN	10.0847	NaN	54.5137	18.606	9.58497	NaN	NaN	NaN	NaN	NaN	NaN	NaN	NaN	30.9205	NaN	NaN	19.6286	NaN	NaN	NaN	13.8019	10.5529	12.7603	NaN	NaN	NaN	NaN	5.37519	NaN	31.4416	NaN	NaN	NaN	NaN	NaN	NaN	6.30279	NaN	9.76086	NaN	7.85238	7.83699	13.2904	NaN	8.85975	8.02375
NaN	0.507949	0.393654	0.739973	NaN	0.338123	0.321616	0.246457	1.52676	0.300833	0.441969	0.329815	0.428431	0.175389	0.407515	0.361037	0.134588	0.235705	0.500551	0.366596	NaN	0.276365	0.152214	0.08726	0.254875	0.125189	0.162824	0.16214	0.204973	0.317299	0.341647	0.243238	0.164023	0.152337	0.218031	0.311633	0.17316	0.129445	0.130936	0.178117	0.228765	0.238766	0.150923	0.0945984	0.315896	0.143509	0.326137	0.120792	0.0565899	0.0454133
1.36495	0.20571	0.768876	1.66597	0.988826	0.784498	1.02533	0.952472	0.569703	0.866551	0.934143	0.833681	0.830427	0.528821	0.816727	1.12845	1.54143	0.692905	2.16793	1.2224	0.937207	0.310087	0.310126	0.692329	0.538126	0.513795	0.340333	0.338765	4.89452	0.566091	1.33631	0.65505	1.00791	0.964413	0.45685	0.745601	0.461425	0.317229	0.473776	0.35529	0.319152	0.221381	0.633352	0.334683	0.480677	0.107249	0.370082	0.17952	0.120401	1.00556
0.535103	0.983284	0.325531	0.709824	0.789765	0.5148	1.82159	0.856018	0.274869	0.57857	0.78125	0.557476	0.488305	0.425623	0.589623	0.492708	0.946432	1.08438	1.12929	1.24802	0.530842	NaN	0.246378	0.23727	NaN	0.422476	0.346105	0.207572	2.14169	0.558878	0.469461	0.385594	0.220755	0.467705	0.220561	0.145421	0.174022	NaN	0.915667	0.294898	0.248886	0.323468	1.78145	0.24924	0.231556	0.201232	0.206258	0.187133	0.702346	0.337975
1.65175	4.38097	3.56024	3.26317	1.00372	2.96252	1.06151	2.42648	2.11274	6.3955	4.98927	2.82135	2.6286	5.37924	2.28571	3.26275	1.99442	0.766636	3.24002	2.91562	1.54693	11.6124	0.589657	1.44622	2.77755	1.65835	2.35972	1.04289	1.09737	2.10921	2.55063	1.70114	1.41545	1.37641	4.46429	0.589032	1.08268	1.37078	2.75634	0.584146	1.11647	2.51864	0.686813	1.41774	1.48803	0.488067	1.06735	0.391282	0.638081	1.61106
0.571853	0.256555	0.190873	0.61717	0.579912	0.18803	0.192585	0.219983	0.212053	0.60551	0.466941	0.384882	0.227133	0.316787	0.472367	0.455498	0.772439	0.323091	0.71053	0.820546	0.523697	NaN	0.237965	0.225968	0.223874	0.268018	0.258833	0.076693	1.16035	0.296226	0.351568	0.362924	0.101338	0.242878	0.115243	NaN	NaN	0.352958	NaN	0.137376	0.153865	1.02193	0.132179	0.150877	0.139741	0.0657592	NaN	0.168719	0.188384	0.211833
0.976562	0.735402	0.773037	1.15348	0.960522	1.04601	0.661551	0.953562	1.27314	1.90975	1.17371	1.34838	0.647752	1.04143	0.768344	1.38353	2.1213	0.770001	2.71976	1.14115	0.958681	0.245303	0.344994	0.34779	0.461979	0.51219	0.489668	0.546508	2.41856	0.723589	1.31092	0.823791	1.31007	0.938086	0.350116	NaN	0.252947	0.344175	0.492611	0.327118	0.443872	NaN	0.536107	0.41132	0.677277	0.323227	0.412797	0.464296	0.341227	0.677461
1.046	0.729182	0.531378	1.12699	0.899928	0.992359	0.52815	0.7259	1.08355	1.02739	1.25042	1.19096	0.569249	0.788955	0.796495	1.35929	1.6208	0.755173	2.35716	0.928936	0.832224	0.378874	0.711237	0.424791	0.472813	0.617398	0.503829	0.499825	2.2843	0.750356	0.895736	0.578035	0.841184	0.858517	0.479616	0.28368	0.244738	0.324359	0.490677	0.396652	0.438731	NaN	0.592066	0.46977	0.512663	0.46644	0.576336	0.490966	0.372287	0.521431
NaN	0.559284	0.411879	NaN	0.365591	NaN	0.377872	0.445276	NaN	NaN	0.589831	NaN	0.264006	0.396149	NaN	0.324402	NaN	NaN	NaN	0.640656	0.666889	NaN	NaN	0.286615	NaN	0.445395	NaN	NaN	1.1212	0.483068	0.241534	NaN	0.251699	0.251376	NaN	NaN	0.279877	NaN	NaN	0.368161	0.198491	NaN	NaN	0.18966	0.35417	NaN	NaN	NaN	NaN	NaN
0.805347	2.34219	1.93618	2.62743	1.11889	1.14524	1.02426	0.788146	1.29319	0.964878	2.4639	2.93867	2.27853	1.01734	4.10644	1.55671	0.931706	4.41287	1.14194	2.55102	0.747217	1.71818	0.763942	0.486027	0.471676	1.30506	1.71265	0.452755	0.498206	1.76267	2.34434	1.11962	2.38755	1.03599	0.9739	0.793147	0.372926	0.751654	1.02852	0.466157	1.33437	0.364113	0.686436	0.240575	0.350152	0.978953	1.3152	0.497117	0.352684	0.483887
1.17604	0.220629	0.60024	1.0217	1.01136	0.844381	1.35011	0.640082	0.843099	0.621465	1.52746	0.693049	0.650068	0.40093	0.617665	1.6318	2.18098	0.599736	2.32601	1.24994	0.810898	0.414062	0.54942	0.353857	0.692185	0.619502	0.55457	1.35652	2.41179	0.478927	1.46625	0.658068	0.50388	0.821288	0.482672	0.272301	0.342185	0.34638	0.541653	0.44841	0.374042	0.318888	0.675219	0.661463	0.773814	0.291316	0.536193	0.39521	0.384571	0.914244
0.936593	0.698519	0.694252	1.16895	0.889363	1.00767	0.879662	0.771664	0.779302	0.93668	0.737137	0.772618	0.589275	0.662383	0.76266	1.37446	2.02823	1.55581	0.887942	0.864528	0.699888	0.487543	0.428119	0.4521	0.772499	0.825151	0.559503	0.59641	1.90299	1.21883	0.925326	0.841538	0.628417	0.888652	0.44958	0.294395	0.406504	0.395961	0.410442	0.289318	0.431854	0.356354	0.679579	0.575374	0.389924	0.306805	0.337245	0.363835	0.326552	0.497983
0.458589	0.196506	0.111689	0.330033	0.472992	0.266645	0.544544	0.198181	0.267151	0.439599	0.727008	0.382438	0.30185	0.219476	0.246402	0.446648	0.671637	0.273456	1.19359	0.267802	0.456163	0.119154	0.27947	0.166895	0.175094	0.312207	0.231144	0.570028	0.73244	0.140225	0.401365	0.188101	0.351482	0.301668	0.143711	0.139591	0.164967	0.122833	0.173298	0.200176	0.243303	0.263234	0.336202	0.275931	0.306937	0.191542	0.227733	0.224346	0.164384	0.264732
0.316386	0.373916	0.497611	1.6919	0.312081	0.458211	0.194917	0.176519	0.175871	0.310463	0.324023	0.292261	0.221239	0.223329	0.312236	0.654793	0.32077	0.256799	0.239929	0.507357	0.254777	0.137895	0.41841	0.313627	0.205217	0.136621	0.319489	0.122844	0.104592	0.648677	0.44238	0.400513	0.265922	0.0867228	0.138669	0.138378	0.122833	0.136054	0.0666578	0.147347	0.260715	0.276098	0.448109	0.116367	0.114807	0.147695	0.194047	0.0963113	0.0730834	0.113667
2.01203	1.87171	2.72517	2.33291	1.48805	1.50038	0.894294	1.60733	1.55797	NaN	1.23128	2.81215	2.405	1.2283	2.04478	6.1361	2.27936	2.03471	1.82206	2.25871	0.320904	1.27382	1.75883	1.60102	0.701459	0.698519	1.66179	1.01923	4.34103	1.86801	2.98793	1.68899	1.17178	0.623986	1.36104	1.32853	0.479777	2.36072	1.08796	0.725426	1.04557	0.352051	1.66675	0.90009	0.915164	1.07468	0.963484	0.752842	0.642839	0.551055
1.24059	0.890472	1.36387	0.940911	0.786844	0.511038	1.09456	1.00286	0.970214	1.62866	0.866176	1.006	1.03717	0.785546	0.810307	1.05573	1.21643	1.05862	1.30733	1.02133	0.9996	0.339317	0.562366	0.459221	1.04234	0.651636	0.44484	0.599592	2.05579	0.86259	1.29107	0.831878	0.660415	0.648298	0.268377	NaN	0.397425	0.434292	0.492659	0.492708	0.663526	0.379781	0.673718	0.633834	0.547795	0.266241	0.590319	0.574284	0.667512	0.779362
0.611583	0.474947	0.373664	0.364325	0.550964	0.677782	0.630517	0.535389	1.88701	0.457624	0.328601	0.492053	0.498331	0.403665	1.0945	0.944109	0.394633	0.618467	0.358064	0.382673	0.445256	0.267996	0.387402	0.677828	0.48598	0.699056	0.402075	0.544603	0.792142	0.447227	0.516529	0.344459	0.44613	0.377758	0.18485	0.259208	0.334415	0.397346	0.400433	0.375799	0.434141	0.393856	0.549874	0.469792	0.284438	0.292133	0.404089	0.258839	0.285355	0.244744
0.757518	0.739044	0.651848	1.13321	0.86326	0.281429	0.613121	0.954836	0.739645	1.22282	1.12554	1.51197	1.56927	0.814465	0.90703	1.06366	0.905633	0.68171	1.31287	0.774054	2.09644	0.5817	0.644579	0.618276	0.657073	0.459369	0.485343	0.505408	2.12707	1.01287	0.790264	0.816193	0.609607	0.563603	0.979336	0.458589	0.505919	0.396762	0.306251	0.482998	0.545375	0.517464	0.415904	0.536078	0.501404	0.55537	0.62081	0.575242	0.542005	0.761267
0.420893	0.369208	0.707664	0.255226	0.270497	0.240125	0.168316	0.329728	0.357552	0.303049	0.705169	0.501807	1.01149	0.531321	0.846382	0.674082	0.200521	0.473306	1.05043	1.28747	0.284616	0.719476	0.246221	0.579878	0.162813	0.435047	0.358025	0.240021	0.162067	0.319713	0.536913	0.497636	0.439136	0.234974	1.16978	0.239206	0.308166	0.255389	0.173238	0.314436	0.182545	0.277708	0.168455	0.21826	0.278513	0.138315	0.183982	0.12733	0.161765	0.232035
1.5822	1.03659	0.997805	2.12988	2.25902	0.617627	0.938967	1.76252	1.07508	1.729	2.13534	0.913492	2.13584	0.66538	1.33679	1.90898	2.94022	0.90876	1.82785	1.42974	1.59403	1.21694	1.14743	0.816727	1.32401	1.56656	1.133	1.64775	5.67408	1.0784	2.74642	1.06277	0.309617	1.08399	1.12616	NaN	2.01102	0.701656	0.860882	0.300048	0.342231	NaN	0.706065	1.38209	1.06688	0.20229	0.773276	0.917431	0.897102	1.5751
0.67815	0.413907	0.709723	1.62808	0.558254	0.717309	0.43691	0.591261	0.324254	0.864603	0.525072	0.549964	0.433651	0.433144	0.656383	1.48067	0.433651	1.03728	0.673718	0.74085	0.731636	0.457415	0.152082	0.487353	0.354874	0.732011	0.834376	0.315467	0.382878	0.427004	0.779545	0.421337	0.419182	0.422012	0.277662	0.264915	0.260756	0.358654	0.372939	0.313824	0.484473	0.349687	0.478332	0.329544	0.547945	0.453618	0.539724	0.284277	0.29107	0.698714
0.308309	0.292449	0.358667	0.259923	0.238817	0.880592	0.369385	0.251376	0.210389	0.294586	0.431593	0.147752	0.40818	0.238869	0.40798	1.19439	0.337336	0.233013	0.400272	0.281009	0.259168	0.292167	0.146555	0.238886	0.396589	0.235344	0.291554	0.144433	0.227531	0.292972	0.572902	0.215466	0.229885	0.303582	0.222104	0.10115	0.251326	0.226798	0.139542	0.35461	0.142343	0.477395	0.264606	0.140178	0.244648	0.0994926	0.117115	0.064	0.105678	0.169345
0.816593	0.614515	0.466527	2.62522	0.762602	0.396762	0.537346	0.809127	0.407349	0.960246	0.784498	0.696379	0.434141	0.468977	0.725584	1.00588	0.968429	0.767283	0.955201	0.753352	0.683854	0.513716	0.192712	0.47934	0.320267	0.374518	1.0447	0.346993	0.529129	0.677323	0.776156	0.719994	0.401784	0.428064	0.606355	0.351853	0.285763	0.262847	0.438212	0.301277	0.445653	0.198385	0.558815	0.417676	0.40848	0.387732	0.50984	0.467508	0.472947	0.537548
NaN	NaN	NaN	NaN	0.719217	1.03045	NaN	1.1157	0.775014	NaN	0.697983	0.666223	0.959049	0.775916	1.49091	1.03455	1.08745	NaN	1.26947	NaN	NaN	NaN	NaN	NaN	NaN	0.671817	NaN	0.340867	1.00117	NaN	1.19387	0.432938	0.399696	0.432676	NaN	NaN	NaN	NaN	NaN	NaN	NaN	NaN	0.41115	0.522849	NaN	0.668717	0.636092	NaN	NaN	NaN
0.536481	NaN	0.323918	2.04687	0.638692	0.530955	0.252054	NaN	0.658285	0.310463	0.400866	0.702494	0.483185	0.560632	0.422315	1.01658	0.523917	0.804117	0.747552	0.535877	0.986972	0.244529	0.255454	0.349211	0.33972	0.559691	0.521322	0.55212	0.87604	0.463049	0.646621	0.593895	0.337689	0.436681	0.479754	0.137484	0.522985	0.434122	0.20016	0.29985	0.321895	0.289662	0.107522	0.351346	0.559034	0.198503	0.458779	0.455104	0.309703	0.5712
0.43929	0.224532	0.325818	0.826856	0.522521	0.260906	0.748783	NaN	0.322893	0.473754	0.385238	0.426548	0.419235	0.500075	0.654707	0.645578	0.684744	0.441872	0.353807	0.772082	0.341869	0.352336	0.229395	0.310491	0.306617	0.624571	0.611135	0.313126	0.352908	0.22416	NaN	0.386772	0.616409	0.152416	0.370165	0.785238	0.134905	0.265104	0.261097	0.249445	0.28529	NaN	0.321947	0.234852	0.369877	0.278064	0.121911	0.178348	0.177576	0.205305
3.1505	NaN	0.945537	NaN	2.59309	6.17436	NaN	2.6693	NaN	NaN	1.1751	1.38163	2.41856	2.68709	4.1401	1.94552	2.11667	7.21761	6.6379	2.42801	NaN	NaN	NaN	NaN	3.69399	NaN	2.86189	NaN	3.99872	13.3213	NaN	NaN	0.52615	NaN	1.28627	1.9968	NaN	NaN	NaN	NaN	NaN	NaN	0.935454	0.83257	0.610501	0.677048	1.21197	0.467071	NaN	4.05055
1.67791	NaN	NaN	1.23472	1.35366	NaN	NaN	NaN	NaN	NaN	1.44055	1.12524	1.07969	NaN	0.65505	1.09784	1.53707	0.99108	1.39041	1.06419	0.952925	0.590772	NaN	NaN	NaN	0.967961	0.942951	1.42335	2.7908	NaN	0.658198	NaN	NaN	0.700771	NaN	NaN	NaN	NaN	NaN	0.757117	NaN	NaN	0.829669	NaN	0.674263	1.00409	1.07811	0.896379	1.03167	0.733192
0.539928	0.596445	0.671051	1.41723	0.434273	0.848032	0.400641	0.860956	0.314297	1.00876	0.49613	0.513901	0.757748	NaN	0.687758	1.37184	0.567086	0.546866	0.795102	NaN	0.45108	0.30773	0.273808	0.371154	0.489309	NaN	0.732601	0.476872	0.425804	0.53183	0.614364	0.493243	0.393144	0.404155	0.35246	0.165533	0.356202	0.300481	NaN	NaN	1.01315	NaN	0.440956	0.257705	0.289026	0.427186	0.247054	0.285364	0.353557	0.362858
NaN	0.492296	NaN	1.01759	0.923702	0.86103	0.572672	0.748503	0.829807	NaN	1.25302	1.403	NaN	0.697837	0.895416	0.683107	1.75141	1.28403	1.96151	1.4228	NaN	0.866101	NaN	1.26622	1.32568	NaN	NaN	NaN	1.3254	1.16024	NaN	0.739754	0.649056	0.703334	0.713572	NaN	NaN	NaN	NaN	NaN	0.569703	0.642839	0.522657	NaN	0.61546	NaN	0.910498	NaN	0.775555	0.424052
0.901307	1.74642	1.03505	0.851209	0.958773	0.512715	0.498355	1.83607	1.30376	1.25666	1.61269	1.71571	1.19657	1.56924	1.01124	0.548667	0.834516	0.81314	1.12817	1.45586	0.434707	3.22633	1.25655	1.16541	0.516956	0.964599	0.83689	0.704374	1.77737	0.861846	0.465354	0.885034	0.919879	0.914662	1.48876	0.65647	0.596694	0.363676	0.893815	0.87858	1.06406	0.485625	0.740357	0.665424	0.807363	0.571429	0.750469	0.87804	0.669299	0.697691
1.15602	0.895496	0.879662	2.0394	0.78376	0.5817	0.672902	0.717515	0.50971	1.23145	0.73524	0.857118	1.44227	0.766989	1.05442	1.63276	0.856458	0.64771	1.10491	1.22693	1.21863	0.671276	0.427204	0.670421	0.509373	0.675219	1.3988	0.498753	0.509944	0.840407	0.998502	0.892061	0.590563	0.815528	0.536394	0.507614	0.404187	0.452427	0.683761	0.361978	0.588408	0.312911	0.755344	0.51581	0.464684	0.522166	0.742335	0.484121	0.426894	0.697545
0.825627	0.441053	0.402253	0.874432	0.728704	0.626135	0.288268	0.491401	0.388455	0.919118	0.562398	0.834307	0.489237	0.497043	0.859402	1.53586	0.725058	0.698763	0.629129	0.929282	0.599808	0.459496	0.262778	0.58072	0.856238	0.649014	0.505331	0.639918	0.515597	0.501027	0.938086	0.330295	0.29449	0.478583	0.418375	0.515677	0.126876	0.366461	0.344935	0.26768	0.338444	0.303398	0.462535	0.338891	0.518887	0.514139	0.657981	0.458421	0.272494	0.680643
1.4723	3.34046	2.01341	2.89746	1.22027	0.529409	0.857118	1.36748	1.37882	1.14941	1.81465	1.40453	1.98744	1.08841	2.26665	2.88659	2.2669	1.04635	2.97983	5.42094	1.3584	4.41813	0.834376	1.00892	0.802826	1.30634	1.57719	0.698763	1.32237	4.0662	0.960799	1.81104	1.13185	1.48958	1.31216	0.866701	NaN	1.07537	1.63878	0.529437	0.662383	NaN	0.903179	0.92285	0.519697	0.432657	0.931099	0.474654	0.877963	0.617856
NaN	NaN	1.04054	0.588963	0.935629	NaN	0.939585	NaN	0.932662	1.45001	NaN	1.01317	NaN	NaN	1.14281	NaN	NaN	1.05939	0.810307	NaN	NaN	0.547765	NaN	NaN	NaN	NaN	NaN	NaN	0.736757	NaN	0.598337	0.865576	NaN	NaN	0.646037	0.536596	NaN	NaN	NaN	NaN	NaN	0.563253	0.701656	NaN	0.498033	NaN	NaN	NaN	0.457624	0.761209
0.455228	0.395664	0.494413	1.05614	0.867453	0.556112	0.980969	1.23358	0.778452	0.581159	1.29007	0.794029	0.977326	0.662164	1.07124	1.91487	1.31992	0.643791	1.4708	1.0921	0.579744	0.426258	0.470256	0.54484	0.806127	0.734107	0.823723	0.494291	1.40424	0.664187	0.997606	0.767754	0.854263	0.953016	0.494169	0.271798	0.334336	0.449135	0.427789	0.362897	0.482207	1.00129	0.619118	0.517652	0.62383	0.227464	0.476554	0.50764	0.483489	0.66335
0.891266	0.660066	0.667958	0.957396	0.832362	1.07177	0.683807	0.586235	0.989022	1.03229	0.833889	1.02596	0.81686	0.692233	1.00897	1.44415	1.34468	0.921829	1.13868	1.16279	1.08798	0.483652	0.81626	0.535906	0.541213	0.716076	0.574152	0.579341	2.00477	0.843526	1.15535	0.729501	0.720513	0.813604	0.460851	0.208069	0.305334	0.544544	0.532368	0.36118	0.714592	NaN	0.792456	0.599233	0.698226	0.476758	0.552975	0.470079	0.543095	0.843313
1.45294	0.672993	1.17536	1.6009	1.53146	0.819806	1.64125	0.960799	1.21635	1.13268	1.28259	1.27075	1.34909	0.905305	1.18617	1.54109	1.31184	1.1554	1.49622	1.18954	1.28937	0.881445	0.832709	1.26997	0.877116	1.10136	0.921319	1.2051	1.94209	1.05993	0.292278	1.06268	0.773156	0.974564	0.866776	0.531632	0.547136	0.342313	0.967492	0.591541	0.874126	0.582208	0.995718	1.22242	0.81281	0.834724	1.11566	1.01785	1.16895	1.04453
0.833333	0.859993	0.939055	0.854701	0.68278	0.823181	0.755458	1.13314	0.621195	1.15695	0.594778	0.985125	1.20681	0.901632	1.28621	1.67302	0.787464	1.00233	0.83382	1.17368	1.21283	0.64683	0.367972	0.498107	0.775254	0.668003	0.567247	0.447167	0.479616	1.44991	1.14536	0.808211	0.567601	0.640164	0.735943	0.410762	0.535533	0.626096	0.48391	0.383612	0.455125	0.514748	0.594884	0.544662	0.456579	0.267051	0.550327	0.419692	0.640246	0.471565
1.41253	NaN	0.784129	1.15153	1.8595	1.41173	1.41511	1.18694	1.76997	0.974279	1.23796	1.29623	1.63688	1.40627	0.914077	0.868131	1.59038	1.52228	0.564653	0.984349	3.50018	1.92626	59.2557	6.54236	1.47894	2.35949	NaN	2.51572	1.82163	NaN	1.49817	2.33738	5.03525	2.91469	2.25571	2.9502	2.39636	NaN	4.84168	1.41965	1.51194	0.874126	1.21123	3.9384	3.76548	2.66887	1.97828	4.92829	3.64737	2.68738
1.093	1.96005	0.94688	1.89491	0.806777	2.20439	0.635082	1.38295	1.04845	1.30531	1.63554	2.15522	0.9995	1.10747	1.20502	1.2557	1.27494	1.54197	1.35499	2.51838	1.26092	1.2071	0.645911	0.580686	0.494609	0.709723	0.640246	0.727961	1.39884	2.26501	3.33344	1.14618	1.04736	0.905223	0.842886	0.506201	0.457498	0.453453	0.581937	0.560978	0.730247	0.427004	0.731636	0.800448	0.544514	0.439522	0.959233	0.472121	0.490629	1.10497
0.423531	0.634397	0.7122	0.725426	0.627038	0.672043	0.41658	0.581328	0.366206	0.551389	0.584283	0.699839	0.675493	0.597764	0.656814	1.02405	0.51835	0.557072	0.840124	0.509606	0.575606	0.347766	0.326584	0.575209	0.391145	0.673174	0.409769	0.494707	0.585377	0.67595	0.804441	0.422672	0.20588	0.468384	0.421923	0.315567	0.302535	0.382658	0.343654	0.288734	0.459179	0.290074	0.290166	0.351333	0.415386	0.418113	0.481278	NaN	0.43802	0.389818
0.679209	0.401719	0.615802	1.02544	0.765287	1.26277	0.502386	0.766812	0.415558	1.17118	0.469351	0.428541	0.669031	0.496278	0.713929	1.0091	0.877655	0.509321	0.943129	0.729395	0.333078	0.437867	0.254233	0.706314	0.31409	0.396825	0.584078	0.650745	0.387612	0.567795	0.994135	0.634719	0.462064	0.260457	0.441813	0.297221	0.218967	0.423155	0.355442	0.315816	0.370879	0.145741	0.66454	0.35782	0.749513	0.49613	0.508027	0.395664	0.208629	0.508492
NaN	0.747999	0.548005	0.639304	NaN	0.662164	0.537519	0.571657	0.721033	NaN	0.697739	NaN	NaN	NaN	NaN	0.807102	0.923702	NaN	NaN	0.695749	1.02169	NaN	NaN	NaN	0.449701	0.677369	1.14089	0.793147	NaN	0.915332	NaN	NaN	NaN	0.401139	0.514774	0.44403	0.257832	NaN	0.672948	0.270153	0.5506	NaN	0.518269	0.610836	0.386339	0.74162	NaN	0.423585	NaN	NaN
0.585172	0.822165	0.620964	1.31201	0.47515	0.57924	0.40222	0.623014	0.451263	0.765228	0.584522	0.813537	1.10221	0.716179	1.05058	1.02582	0.556979	0.633072	0.888178	0.683994	0.701262	0.474811	0.282295	0.640205	0.569411	0.658068	0.49351	0.420875	0.500025	0.579005	0.523697	0.626017	0.49169	0.570158	0.569282	0.401477	0.416458	0.499351	0.421976	0.318492	0.42203	0.306814	0.436586	0.524137	0.49034	0.306777	0.497711	0.354246	0.509087	0.521784
1.23106	1.20729	0.716076	0.791703	1.34217	0.777182	0.583295	0.542446	0.495148	0.797194	0.452775	0.423549	1.21694	0.483652	0.353795	1.01102	1.09348	0.407797	1.24958	1.00283	0.708567	0.66269	0.574779	0.977995	0.728544	0.682967	0.98912	0.847458	0.36531	0.634357	1.05202	0.6031	0.718597	0.331576	0.458674	0.369645	0.635647	0.509035	0.469528	0.431053	0.722282	0.792079	0.873897	0.499201	0.50574	0.368881	0.576435	0.406306	0.364924	0.292141
1.47787	1.08293	0.691037	1.78721	2.51877	0.804182	1.44575	0.763767	1.35871	2.54388	1.81907	1.44999	1.34063	1.20365	1.61075	1.72233	2.52678	1.62348	2.3033	1.4537	1.55739	0.891822	0.980969	0.887548	0.692761	1.34758	1.07521	1.23414	2.65929	1.21297	1.40345	1.28026	1.24687	1.46447	0.951565	0.834585	0.730887	0.704275	0.803148	0.806582	1.13827	0.401703	0.879972	0.966838	1.18817	1.17154	0.981354	1.16409	1.14069	1.20254
NaN	1.18592	NaN	0.567762	0.736757	NaN	0.581497	NaN	NaN	0.721501	1.24005	0.986388	1.17298	0.787154	NaN	1.04263	0.838364	1.41473	0.893176	NaN	1.65497	NaN	NaN	1.38171	0.89063	0.957396	0.761789	NaN	1.03744	NaN	0.59755	0.765931	0.592522	NaN	0.657116	0.45608	0.502311	0.542829	NaN	1.2997	0.735781	NaN	0.57924	1.23305	0.657592	0.788146	0.622626	NaN	NaN	NaN
1.30368	1.84128	NaN	1.41109	1.74816	1.93297	1.52753	1.64666	1.68144	NaN	1.38108	2.2058	1.38641	2.35444	2.38555	1.57245	2.51902	NaN	1.90328	0.899281	1.12569	0.872981	1.39307	0.641478	0.767754	1.05128	1.14849	1.54143	1.79102	NaN	NaN	1.98036	1.73118	1.25677	0.822436	0.491256	0.496081	0.953289	1.37948	1.21139	0.608383	NaN	0.961446	0.943485	1.63666	NaN	0.838364	1.78709	0.937119	NaN
1.34011	0.914829	1.24811	1.76389	1.00257	1.73265	1.18737	1.10589	0.935191	0.843882	1.30591	1.7178	1.46595	1.47067	1.51345	1.73822	0.930752	1.1685	1.78298	1.55296	0.600637	0.831048	0.961076	1.1452	1.3582	1.27036	1.64878	1.08788	1.59036	1.03517	1.09154	1.3978	0.856825	1.2697	0.944198	0.694396	0.60698	0.763534	0.971062	0.543154	1.08962	0.465116	1.16095	1.40052	1.06417	1.1728	0.998402	0.745101	0.752445	0.815262
NaN	NaN	0.483863	NaN	0.914495	NaN	NaN	NaN	1.1738	1.88612	0.776578	0.784621	0.877963	0.778877	1.06876	0.938703	0.958497	0.9273	1.26654	0.823791	NaN	0.551116	NaN	NaN	NaN	0.829738	0.737735	NaN	1.24881	0.908265	NaN	0.643046	NaN	0.697399	NaN	NaN	NaN	NaN	0.636335	NaN	0.83654	NaN	NaN	0.865426	NaN	NaN	NaN	0.567505	0.551055	0.707764
0.539491	0.52304	0.554847	1.15186	0.523396	0.635526	0.584419	1.23709	0.453885	0.301878	0.735456	0.456621	0.406934	0.556669	0.512111	1.06953	0.601576	0.481186	0.884095	0.551055	0.735619	0.587233	0.602011	0.614893	0.996214	0.289486	0.583737	0.718856	0.448773	0.87604	0.716949	0.461382	0.447888	0.407349	0.650703	0.401526	0.310704	0.56478	0.42684	0.29898	0.322789	0.386997	0.339259	0.307031	0.465593	0.333545	0.355013	0.468055	0.328763	0.539869
1.13766	0.7414	1.31187	1.57364	0.753296	1.0873	0.549783	1.61366	1.09617	0.811688	0.919287	0.962279	0.964227	0.81626	1.25318	1.26231	0.819202	1.29462	1.08912	1.56043	1.95347	0.701361	0.758495	1.35384	0.528123	0.950661	0.601649	0.513163	0.591471	1.3549	1.91942	0.992654	0.843526	0.534702	1.01799	0.434915	0.443813	0.644829	0.633312	0.397978	0.639672	0.396338	0.670916	0.870701	0.636092	0.57107	0.797321	0.466135	0.730674	0.718288
1.53915	2.10597	1.8383	1.87998	1.61379	2.23294	1.53388	1.7671	1.18375	1.00685	1.42047	2.01922	2.98963	1.58318	3.20184	1.65341	1.72912	2.00481	0.686624	2.33421	1.06215	5.5054	1.50306	1.83369	0.845094	1.34515	1.53917	0.933707	1.64169	2.95334	0.740028	1.5797	1.01058	1.19847	1.71993	1.44751	0.691898	1.03373	1.35934	1.02151	1.08154	0.979144	1.18879	1.75741	1.13874	1.44528	1.97796	0.944555	1.31089	1.71748
0.564302	0.476667	0.503297	0.692041	0.758668	0.346572	0.462792	0.48151	0.435331	0.87943	0.543095	0.601612	0.772857	0.615006	0.598337	0.718494	0.959969	0.764176	0.624259	0.662252	0.69056	0.343631	0.475059	0.583465	0.956023	0.519454	0.485295	0.795671	0.713878	0.594884	0.735673	0.447307	0.440839	0.566604	0.342372	0.323478	0.383054	0.379018	0.351853	0.378387	0.363782	0.308766	0.642632	0.477646	0.584522	0.441267	0.453309	0.389181	0.31503	0.597979
0.522139	0.476803	NaN	0.578235	0.532056	0.656814	0.324107	0.595912	0.39752	0.601793	0.618812	0.518054	0.378917	NaN	0.368338	0.536308	0.658154	0.37103	0.726058	0.55605	0.590423	0.336112	0.575076	0.568569	NaN	0.410745	0.528429	0.593895	1.00468	0.492611	0.621813	0.574086	0.525045	0.415438	0.458337	0.287695	0.261472	0.432957	0.507048	0.453494	0.309856	0.29227	NaN	NaN	NaN	0.418078	0.218833	0.318329	0.322175	0.391099
0.958497	1.03823	0.79139	0.587233	1.1721	0.401606	0.678472	0.472478	1.06122	1.36372	1.22401	1.06488	0.668092	0.888336	1.13572	1.0982	1.68243	1.58672	2.11323	0.921489	1.14618	0.799616	0.958222	0.639468	0.587061	0.761441	0.79164	1.17737	1.2591	0.752445	0.865277	0.934841	1.09625	0.716897	0.556824	0.39917	0.506945	0.745045	0.695797	0.548095	0.631074	0.64512	0.914578	0.691659	0.859845	0.669882	0.651848	0.667289	0.765345	0.904568
0.632111	0.572082	0.377273	0.304897	0.725374	0.621388	1.00962	0.707514	0.606943	0.522275	0.471032	0.860585	0.538213	0.549722	0.989511	1.25992	0.735943	1.13442	0.753239	0.95511	0.604851	0.400352	0.693049	0.742611	0.628733	0.602518	0.43535	0.45161	1.33984	0.825355	0.465463	0.534502	0.533903	0.462877	0.239584	0.450308	0.514245	0.599449	0.443262	0.507769	0.773754	0.598731	0.907359	0.640082	0.333411	0.514218	0.526288	0.348238	0.381461	0.480307
0.937647	0.542711	0.592557	1.24418	2.37665	1.32906	0.802182	0.962557	0.982125	1.17628	1.45332	1.15239	1.68677	0.763068	1.06229	1.5547	1.34034	0.674946	1.20755	0.9995	1.75297	0.681292	1.22794	0.991277	0.654707	0.915248	1.30852	1.67429	2.18084	1.11663	1.15222	1.2984	0.684885	1.15407	0.885034	0.892777	0.431555	0.671727	0.565579	0.968054	0.852224	0.515996	0.72759	0.951565	0.743605	0.785238	1.1346	0.956023	0.879585	0.777544
0.576435	0.659631	0.476872	0.573987	0.597193	0.517652	0.512584	0.369385	0.446229	0.73692	0.291903	0.525873	NaN	0.586476	0.618123	1.02851	0.550358	0.627786	0.828089	0.840266	0.613873	0.335694	0.420486	0.520318	0.203861	0.657549	0.398804	0.471787	0.820883	0.324412	0.627904	0.469925	0.337166	0.434839	0.263186	0.303785	0.426421	NaN	NaN	0.412916	0.435388	0.385996	0.498952	0.274281	0.379319	0.476327	0.536021	0.39968	0.267752	0.466832
0.662427	0.314822	0.410273	0.422226	0.234329	0.658458	0.340252	0.422476	0.226045	0.378802	0.192108	0.518457	0.556297	0.311274	0.457268	0.504846	0.303141	0.243617	0.50551	0.484473	0.228113	0.348979	0.209934	0.364511	0.659761	0.23131	0.277631	0.270015	0.250696	0.530926	0.511274	0.247672	0.216488	0.178329	0.434424	0.211283	0.357603	0.309741	0.143439	0.196098	0.213497	0.541682	0.372038	0.240062	0.294942	0.156823	0.229949	0.164325	0.155094	0.1908
0.698032	0.677599	0.636699	0.511561	0.687191	0.902935	0.751371	1.0786	0.66912	0.46436	0.725742	0.608198	0.593719	0.554293	0.545286	0.761789	0.576801	0.563889	0.682082	0.479962	0.783576	0.356328	0.668494	0.519238	0.868659	0.511195	0.817795	0.797639	0.498157	0.974184	0.947329	0.514007	0.660022	0.495958	0.320842	0.287084	0.268868	0.492611	0.424466	0.331796	0.495909	0.358963	0.297805	0.367485	0.405285	0.347874	0.47533	0.457247	0.424791	0.27635
0.665513	0.580552	0.678518	1.03814	0.914244	0.877809	0.624298	NaN	0.411641	NaN	0.524604	0.765345	0.691898	NaN	0.794218	0.771129	0.507898	0.756945	0.724953	0.65028	0.79233	0.412439	0.269172	0.450552	0.832709	0.840195	0.654707	0.518242	0.682408	0.820546	0.669523	0.672948	0.544129	0.549179	NaN	0.347633	NaN	NaN	0.517598	NaN	0.609868	0.385817	0.480954	0.323133	0.342606	0.285461	0.599054	0.363716	NaN	NaN
0.732011	0.506252	0.823655	1.18454	0.803859	0.920302	0.92816	0.916506	0.746547	1.072	1.27388	1.21318	1.10045	0.74638	1.27572	1.57778	1.00951	0.872296	1.60406	1.23274	1.48533	0.640533	0.566893	0.644205	0.522684	0.953562	0.743108	0.862664	1.06058	0.980296	1.61038	0.860289	0.59446	0.937295	0.60529	0.488305	0.295779	0.477259	0.605987	0.400256	0.796305	0.783454	0.806712	0.739317	0.649773	0.642385	0.93214	0.616751	0.665203	0.710177
1.61119	1.27228	1.16898	1.24992	1.1076	2.2765	0.931359	0.857633	0.873134	0.767107	1.14359	0.853971	1.19008	1.09036	1.65	1.83729	1.02891	1.02686	0.833403	0.92885	0.406967	0.733676	0.856678	0.721033	0.868961	0.571853	0.676773	0.734053	1.41886	1.7734	1.96017	1.32524	1.11713	0.914997	0.581971	0.243138	0.42935	0.695072	0.807363	0.581835	0.853024	0.460087	0.70932	1.07259	0.555278	0.43416	0.522111	0.567795	0.656513	0.711896
1.27784	1.35402	1.02857	5.35647	1.03367	0.887312	1.11777	1.11949	1.02947	1.15169	1.5614	1.32917	1.57893	1.24566	1.57517	2.05449	1.51978	1.18691	1.12913	1.99021	1.44492	1.33957	0.693001	0.91878	0.962094	0.959509	1.26905	0.690655	0.916758	1.79737	1.42538	1.3147	0.802053	1.08215	1.17858	0.545852	0.748951	0.911079	1.01164	0.770772	1.21345	0.770001	0.913826	1.60989	0.876885	0.916506	1.31735	0.896138	0.804441	1.0175
0.631233	0.712504	0.589102	0.905633	0.780945	0.935366	0.70927	0.418901	0.64914	1.11163	0.971157	0.63955	0.551268	0.657376	0.851136	1.46071	0.984349	0.481951	0.954198	0.772499	0.648004	0.417362	0.366421	0.584624	0.595096	0.513927	0.748839	0.637999	0.659631	0.674127	0.77997	0.495737	0.68937	0.569866	0.402674	0.47524	0.496376	0.479524	0.350299	0.468274	0.422833	0.862813	0.517706	0.399425	0.495712	0.34943	0.506637	0.564143	0.419727	0.74228
0.536193	0.427113	0.536654	0.908513	0.606281	0.53268	0.345292	0.643915	0.523231	0.432246	0.684182	0.621311	0.417449	0.565739	0.554693	0.817127	0.701607	0.793777	NaN	NaN	0.80109	0.731582	0.397709	0.677553	NaN	0.512847	0.467486	0.834098	0.799936	0.563634	0.69667	0.675767	0.538619	0.377173	0.472545	0.460936	0.282773	0.197973	0.431723	0.2849	0.273867	0.35727	0.564557	0.776217	0.257779	NaN	0.774174	0.161883	NaN	0.738989
NaN	1.38064	0.893975	1.21456	1.51048	1.74459	NaN	1.4056	0.81367	0.939144	2.0504	1.28722	1.061	0.958865	1.52791	2.22573	2.00421	1.40386	1.62737	1.29688	1.86296	0.710025	0.866401	1.26073	1.2242	1.11585	1.43363	1.0893	1.8525	2.59262	1.04606	1.28786	0.861475	1.15739	1.15686	0.757117	0.660327	NaN	0.921574	1.43268	0.998901	NaN	0.630001	1.03223	0.937822	0.838645	1.5598	0.606465	0.753807	1.02147
0.659457	0.409618	0.573592	0.610463	0.705866	0.614931	0.465116	0.512033	0.369113	0.776397	0.53166	0.71736	0.621272	0.507846	0.977135	0.868885	0.598337	0.736486	0.856531	0.610128	0.609162	0.439117	0.287447	0.335976	0.286131	0.431276	0.481209	0.415334	0.539578	0.624961	0.720253	0.484895	NaN	0.478881	0.465896	0.24684	0.279666	0.325277	0.34263	0.36846	0.374897	0.446289	0.431351	0.52105	0.331675	0.46477	0.499301	0.551755	0.372537	0.299922
0.725058	0.583329	0.398375	0.533988	0.973236	0.330972	0.466505	0.633995	0.450187	1.08431	0.551177	0.4723	0.996611	0.432451	0.629445	0.764585	0.788395	0.605804	0.926183	0.422279	0.805153	0.314584	0.403698	0.643915	0.484308	0.661682	0.579811	0.753977	0.945805	0.37103	0.819068	0.402593	0.594601	0.479985	0.411489	0.401929	0.543242	0.416025	0.378415	0.456621	0.44613	0.431518	0.512111	0.448089	0.396149	0.407747	0.534359	0.613497	0.405959	0.532566
1.97828	1.07514	1.24747	2.4057	2.97716	1.78798	1.3344	1.40248	1.35177	3.4024	1.882	1.5513	1.51474	1.46746	1.38435	2.459	2.55037	1.93173	2.12993	2.15531	1.85653	1.47308	1.32335	1.72712	1.21055	1.19944	1.67873	1.76128	2.47506	1.40621	1.67833	1.68549	1.58539	1.7681	1.45658	1.17884	0.619617	1.28291	1.30424	0.973805	1.44184	0.822774	1.14517	1.48289	1.52087	1.06817	1.97507	1.44896	1.20114	1.58712
0.637349	1.03086	1.10762	1.35055	0.703878	0.890472	0.941797	1.0695	0.923787	1.04191	1.13657	1.29381	1.32528	0.990393	1.06787	1.88221	1.02619	0.990295	1.17948	1.79963	NaN	1.04312	0.794092	0.784745	1.54955	1.073	0.933445	0.878272	0.865801	1.66533	0.845023	1.21417	1.11478	0.828432	0.909752	0.56164	0.681942	0.808996	0.886918	0.766342	0.825764	0.357795	0.604558	0.858443	0.668896	0.822571	0.925326	0.711339	0.739809	0.912992
0.721865	0.556204	0.402447	0.723641	0.40093	0.373636	0.322331	0.551663	0.432975	1.00534	0.641725	0.596908	0.584522	0.472701	0.651593	0.564111	0.680689	0.503702	0.521839	0.755801	0.372315	0.372842	0.415369	0.370082	0.550297	0.326105	0.400497	0.429812	0.760052	0.652486	0.752955	0.464835	0.462321	0.526288	0.295823	0.369713	0.384246	0.270365	0.493364	0.510491	0.352597	0.445315	0.230192	0.374042	0.355783	0.218231	0.298214	0.350779	0.265929	0.335818
1.57754	1.04421	1.15954	1.30054	2.36552	1.64212	1.10409	1.69707	1.29645	NaN	1.58619	1.2696	1.18541	1.25718	1.18136	1.67656	1.50195	2.16924	1.74538	1.7165	1.25534	0.804052	0.967024	1.29237	1.26013	1.17178	0.897424	1.33142	2.09859	1.81689	1.4619	1.21809	1.20301	1.06697	0.908183	0.720098	0.589588	1.01743	1.04425	0.865876	0.925069	NaN	1.19822	0.959233	1.02472	1.04092	1.28218	1.18388	1.08199	1.25565
0.694493	0.463285	0.305194	0.455602	0.61121	0.243879	0.661638	0.38257	0.363055	0.522466	0.525486	0.684885	0.316927	0.373065	0.620578	0.419621	0.546926	0.566829	0.533305	0.268449	0.472344	0.345961	0.681431	0.548757	0.394789	0.557445	0.596979	0.605914	0.816727	0.347633	0.397931	0.423998	0.360153	0.39035	0.296727	0.325246	0.308195	0.39801	0.257759	0.633874	0.50388	0.275733	0.371443	0.558659	0.457331	0.356786	0.507382	0.453618	0.368664	0.269614
1.10278	0.712758	0.581193	1.60251	0.851861	1.03084	1.30504	0.808865	0.552578	1.16757	0.851136	0.757518	0.793336	0.837451	0.83956	0.915583	0.819806	0.885112	0.83731	1.03844	0.607607	0.759879	0.738989	0.710328	0.969462	1.05199	1.0332	0.869338	1.2125	1.23836	0.868734	0.837872	0.612633	0.665159	0.409417	0.501857	0.58548	0.575705	0.75706	0.668047	0.744435	0.715871	0.90967	0.819269	0.626056	0.77682	0.798786	0.563634	0.455	0.620964
1.21256	0.90703	0.841893	1.22503	1.2783	0.760167	0.996413	0.902283	0.983381	1.3721	1.27131	1.13307	0.929109	0.897988	1.13331	0.994926	2.13397	1.6562	1.38357	1.24702	1.01155	0.968898	1.17051	1.00466	0.881057	0.873744	0.965904	0.97371	2.27837	0.948857	1.29157	1.17802	0.815661	0.787712	1.06527	0.837731	0.636618	0.996016	0.984543	0.649519	0.885191	1.01933	0.60698	0.711339	0.857412	0.660676	0.996512	0.745045	0.68018	0.949037
0.982994	0.905305	1.14209	1.79305	0.913576	1.10511	1.28105	0.956572	0.890393	NaN	0.949938	1.2067	0.720202	1.1611	1.27058	2.04157	1.47868	1.57739	1.10305	1.83379	0.872296	1.20051	1.13277	0.929973	0.484567	1.88701	1.40982	1.06873	1.08198	0.895977	1.00907	1.24302	0.888099	0.803084	0.816994	0.714847	0.529353	0.765814	1.15246	0.49317	1.16452	0.712758	0.852152	1.2395	1.31147	0.964785	1.13689	0.715103	0.884408	0.860437
0.821086	0.671321	0.633152	1.23815	1.44636	0.459791	0.083612	0.622626	0.930752	0.902853	1.13614	1.08352	1.31465	0.730353	0.987654	1.1112	1.22446	0.87974	1.53681	0.845952	1.17702	0.747608	0.783576	0.842247	0.639345	0.777907	1.00225	1.26608	1.70184	0.811359	0.989707	0.943307	0.708265	0.873897	0.797194	0.495835	0.558347	0.577334	0.768935	0.826378	0.682314	0.513373	0.715154	0.767754	0.782473	0.655437	0.740302	0.835771	0.802375	0.809651
0.673582	0.815994	0.56899	0.812876	1.11151	0.522166	0.771545	0.439097	0.589866	0.674946	0.75171	0.598695	0.643625	0.508492	0.599269	0.81367	0.889601	0.637918	0.803342	0.678012	0.627668	0.603209	0.574119	0.713114	0.423531	0.704225	0.890789	0.663922	1.10265	0.513373	0.522412	0.745045	0.584214	0.460575	0.446648	0.349235	0.379003	0.715256	0.470876	0.384852	0.450532	0.5997	0.637755	0.569411	0.543065	0.541712	0.581767	0.511457	0.694927	0.765462
1.22288	1.31581	1.63916	1.80047	1.01931	1.8061	1.31631	1.63661	1.94073	NaN	1.06785	1.5309	1.51819	1.55154	1.89132	2.30399	1.51777	1.81515	1.42939	1.81941	0.977899	2.25601	1.73714	0.942063	1.59165	0.857854	1.1525	0.705268	1.29197	1.73971	1.09806	1.62758	1.25335	1.39729	1.83382	1.07794	0.647249	1.35197	0.756601	0.805932	1.25669	0.771307	0.896379	1.0534	1.0696	0.998104	1.22653	1.17467	1.57072	1.67833
0.489596	0.498703	0.359803	0.56373	0.590737	0.346729	0.326168	0.537605	0.56773	0.493583	0.790264	0.292646	0.422262	0.32586	0.290453	0.675813	0.80795	0.334896	0.702593	0.425134	0.515623	0.331246	0.656771	0.595805	0.448189	0.281738	0.529353	0.642467	0.556886	0.280057	0.582751	0.472255	0.606024	0.32844	0.308623	0.240529	0.410813	0.492708	0.387252	0.297779	0.323667	0.395914	0.520915	0.27606	0.387582	0.470633	0.250645	0.442223	0.28729	0.512952
1.40146	0.955475	0.911079	1.56558	2.02753	1.35544	1.1827	1.4381	1.49234	1.77425	1.40178	1.30076	1.46929	1.10921	1.38324	1.42594	1.7012	1.42217	1.90288	1.30393	1.39741	0.998602	0.965158	1.20411	1.1872	1.206	1.4631	1.32695	1.54483	1.18117	1.42592	1.20823	1.31003	1.26481	1.11401	0.719942	0.904323	0.942863	0.708215	1.27685	1.00693	0.925412	0.843099	1.25761	1.27657	0.958313	0.960615	1.26896	1.05522	1.0605
0.560444	0.413668	0.527983	0.947149	0.826515	0.647207	0.462535	0.479823	0.502715	0.900171	0.656728	0.583295	0.767165	0.592698	0.625078	1.03375	0.818331	0.578269	0.912575	0.856825	0.485838	0.406769	0.308928	0.741015	0.290943	0.537403	0.562082	0.634075	0.952109	0.537143	1.14477	0.631233	0.423765	0.534731	0.39839	0.309962	0.262895	0.472054	0.435502	0.560256	0.421781	0.376804	0.482346	0.468625	0.514853	0.447147	0.807363	0.473418	0.314011	0.696864
0.67838	0.479432	0.589275	0.760109	0.693385	0.614439	0.580282	0.827472	0.504032	0.81248	0.587786	0.489932	0.462235	0.535676	0.460363	1.25232	0.629089	0.669703	0.667423	0.591611	0.655996	0.510152	0.440839	0.654622	0.507691	0.377515	0.434443	0.764935	0.569184	0.686012	0.692329	0.490509	0.503195	0.578001	0.398454	0.369495	0.533846	0.503854	0.381316	0.589553	0.506432	0.436967	0.452694	0.449075	0.399505	0.442106	0.46966	0.459179	0.426094	0.622471
1.45973	1.10846	1.32039	1.49229	1.89243	1.13838	0.921999	1.09019	1.02033	2.45507	1.53808	1.20659	1.28896	0.936856	1.27398	1.09308	1.72218	1.30312	1.61676	1.1007	1.37368	0.755515	0.884564	0.940911	0.954198	1.10318	1.35093	0.949938	1.37874	1.1604	1.36754	1.18241	0.97229	1.08523	1.0457	0.825219	0.777605	0.88308	0.925497	1.19229	0.93668	0.395742	0.93633	1.0957	1.23006	0.985125	0.819941	0.988924	1.18054	1.0786
0.65445	0.49729	0.380271	0.71582	0.53888	0.868433	0.397283	0.557072	0.478332	0.6739	0.450288	0.553006	0.709572	0.563095	0.749064	0.899847	0.505842	0.629129	0.809848	0.761499	0.727167	0.371223	0.248422	0.442693	0.445137	0.602119	0.487448	0.642839	0.565867	0.51581	0.559566	0.638325	0.343312	0.308795	1.21228	0.414749	0.575473	0.542211	0.357539	0.283833	0.496106	0.444286	0.487876	0.343324	0.522302	0.372662	0.390869	0.392665	0.356671	0.464231
0.933794	0.798085	0.652018	0.905141	0.783883	0.709774	0.815727	0.652827	0.811557	0.9739	0.870777	1.16419	0.772439	0.689893	0.863111	1.03671	1.10244	1.02831	1.11404	0.848248	0.628022	0.999301	0.589936	1.03188	0.777786	0.721136	0.829325	0.755687	1.17908	0.562082	0.971817	0.880824	0.709019	0.674855	0.815062	0.62348	0.340541	0.74096	0.638121	0.413445	0.615006	0.609013	0.718959	0.861401	0.820277	0.486074	1.05859	0.492926	0.632911	0.892061
0.555988	0.423101	0.630517	0.405943	0.465484	0.509035	0.360347	0.522684	0.370028	0.517411	0.454277	0.331939	0.376591	0.435597	0.555895	0.719321	0.400256	0.395805	0.639304	0.452981	0.35926	0.430478	0.296051	0.293367	0.329554	0.350877	0.393685	0.291333	0.443971	0.990393	0.343548	0.481788	0.27794	0.331477	0.273973	0.187628	0.299177	0.391788	0.173497	0.664143	0.352659	0.286714	0.326147	0.195194	0.25736	0.436643	0.328947	0.312774	0.193409	0.297646
0.592101	1.0595	0.716281	0.848248	0.727061	0.788519	0.844381	0.63008	0.95511	0.575275	1.2869	0.967492	1.06769	0.811096	0.817795	0.88968	0.934143	1.22481	1.31151	0.903179	0.798658	0.890472	0.856751	0.869414	0.760919	0.613648	0.985999	0.806127	0.902201	0.798914	1.32577	0.955749	0.852806	0.500576	0.87974	0.443361	0.682082	0.915919	0.321254	0.516609	0.583942	0.694734	0.577868	0.619157	0.643874	0.738661	1.03206	0.598659	0.661945	0.850919
1.16986	0.981643	0.653467	1.37374	1.45237	1.48399	0.904486	0.813868	1.70381	1.4259	1.24874	1.06715	1.72676	1.29552	1.31354	1.40901	1.16117	1.44288	1.06302	1.25447	0.98068	1.28026	1.15763	1.53043	0.539986	1.00374	1.00979	1.06875	1.34344	0.542564	1.76763	1.25788	1.28512	0.88433	0.794029	0.680967	0.595344	1.24057	0.817461	0.801025	1.04748	0.582683	1.10451	1.12508	0.897263	1.29184	1.18611	0.740247	0.892459	1.22871
0.943307	0.730887	0.775014	1.21988	0.98464	0.978378	0.679117	1.07525	0.627195	2.38362	1.09688	0.891902	1.33856	0.915416	0.98824	0.710126	0.766107	1.11723	0.962279	1.11528	0.821288	0.539084	0.768699	0.834028	1.17407	1.08882	1.04829	0.672133	1.13767	1.00626	3.7154	0.794913	0.579811	0.744602	0.640533	0.499376	0.387552	0.45106	0.647543	0.353382	0.904241	NaN	0.549481	0.644912	0.653296	0.66335	0.871688	0.611733	0.629683	0.887784
0.469594	0.427917	0.806842	0.681431	0.578737	0.482765	0.514721	0.491594	0.468933	1.09223	0.564175	0.460003	0.63857	0.557724	0.656728	0.732547	0.506714	0.523478	0.552364	0.718701	0.541067	0.330742	0.360907	0.645328	0.409668	0.621427	0.529773	0.577834	0.685448	0.432246	0.411489	0.434273	0.382059	0.516876	0.347234	0.323771	0.384748	0.467639	0.847673	0.460448	0.533134	0.280497	0.873591	0.435996	0.470876	0.49838	0.711086	0.410711	0.226968	0.555586
1.12338	0.854628	0.806777	1.05414	1.26822	1.30668	0.818666	0.790139	0.981932	1.27254	0.854409	1.25463	1.32086	0.874202	1.02657	1.03803	1.23565	0.945805	1.16572	1.21647	0.717154	1.05134	0.938262	0.937559	0.604888	0.880359	1.16126	0.965531	0.91191	0.843241	1.22299	0.962557	0.894054	0.977804	0.932401	0.703532	0.42107	0.823791	0.684369	0.585446	0.717309	0.582276	0.840548	0.911743	0.842744	0.840689	1.02527	0.70927	0.84076	0.866927
1.41175	1.25497	1.05671	1.19282	1.54181	1.90502	0.99453	1.40142	1.44361	1.36675	1.31411	1.15108	1.21761	1.23474	1.79491	1.29929	1.36672	1.77154	1.80757	1.36857	1.0816	1.05043	0.883548	0.983187	1.20688	1.19201	1.08703	0.962927	2.00985	1.54658	2.37304	1.24012	1.44415	1.29665	1.0258	0.720357	0.535475	1.01162	0.858443	0.744602	1.15678	0.748727	1.23368	1.01143	0.966557	1.11127	1.10898	0.896941	0.859476	1.10601
0.491497	0.839842	0.670511	0.771248	0.550237	0.370055	0.629327	0.771962	0.347633	0.332757	0.597907	0.440432	0.578503	0.516209	0.480631	0.718856	0.812084	0.610501	0.693289	0.62751	0.704077	0.472233	0.691276	0.49022	0.63012	0.497216	0.635122	0.441384	0.829325	0.682547	0.407764	0.546837	0.436758	0.46729	0.337906	0.379377	0.596161	0.636092	0.828363	0.467224	0.56392	0.529998	0.55894	0.617589	0.36075	0.400866	0.374995	0.431835	0.387147	0.404678
0.78125	0.771367	0.984155	0.773395	1.1711	1.09339	0.913743	0.871688	0.891504	1.18168	0.906865	0.94162	0.934754	0.941531	0.964041	0.984349	0.882613	0.88347	0.744158	1.11625	0.971817	0.806647	0.835911	0.80186	0.686624	0.777424	0.924727	0.712048	1.08678	0.977517	0.984737	0.944644	0.880437	0.927472	0.838223	0.597051	0.405959	0.692857	0.75523	0.573329	0.704126	0.315976	0.659022	0.769823	0.772082	0.79233	0.847314	0.74217	0.78827	0.773754
1.42731	0.747775	1.14949	0.731261	1.53768	1.28693	1.26603	1.39587	0.886525	1.13737	0.972668	1.13713	1.39515	1.05907	0.886525	2.18861	0.988435	1.19905	1.15492	1.60922	0.962094	1.05633	0.863185	1.13271	0.811952	1.60439	0.982415	0.978378	0.915499	1.94447	1.29584	1.23568	0.719373	1.2754	0.789827	0.91416	0.700624	0.657462	0.525818	0.858074	0.9802	0.649266	1.11328	0.780579	0.664584	0.759013	1.91179	0.766107	0.788084	1.08251
1.0315	0.615688	0.542094	0.675584	1.28934	0.538126	0.869036	0.733676	1.00889	1.00312	1.21417	0.892379	1.19241	0.940645	0.909504	1.02187	1.22626	0.722543	1.15784	0.842247	1.11406	0.918527	0.543922	0.660415	0.479203	0.909752	1.01055	0.970497	1.33319	0.873668	0.688563	0.908018	0.978378	0.930839	0.772917	0.59499	0.654707	0.843384	0.856164	0.647836	0.578403	0.428908	0.608754	0.724848	0.88433	0.827677	0.824402	0.750356	0.889363	0.746102
0.82672	0.869187	0.968054	0.900414	0.683293	0.613196	0.939673	0.842531	1.10263	1.05657	0.942596	0.93006	1.48454	1.06552	1.44319	0.903016	1.11019	0.949668	0.726586	1.16749	1.06958	0.777726	0.889442	0.856531	0.953198	0.757518	1.04624	0.575606	1.33147	1.20363	0.688231	0.790139	0.861995	0.710025	0.850991	0.496106	0.723746	0.871536	0.836051	1.18125	0.539957	0.76266	0.910913	0.705219	0.799872	0.729235	0.745768	0.821828	0.668092	0.779727
1.08074	0.765697	1.00384	1.10522	1.18132	0.982801	0.903506	0.856604	0.916506	1.11496	1.15876	1.18594	1.25073	1.09397	1.08765	1.56138	1.33228	0.991768	1.55928	1.45781	0.942863	0.74912	0.778574	0.958865	0.945716	0.860437	0.918274	1.03808	1.32099	1.10483	1.60238	0.933532	1.08754	0.582886	0.749232	0.828638	0.657289	0.732977	0.963948	0.749569	0.716127	0.706065	1.0672	0.897022	0.944109	0.973236	0.949577	0.87727	0.860882	0.798212
1.31308	1.25975	1.1414	1.32224	1.95645	1.0686	2.1034	1.18895	1.4006	1.43203	1.47074	1.46165	1.24045	1.0973	1.21233	1.50295	1.5832	1.03352	1.5826	1.35858	1.32707	0.956755	1.36257	NaN	NaN	1.26107	1.16062	1.10867	1.49909	1.45444	1.15723	1.22145	NaN	1.27631	1.10457	1.23254	0.762311	0.808669	0.976372	1.10721	1.14511	0.515251	0.917179	1.16659	1.12684	1.1049	1.37101	1.56155	1.29066	1.18468
1.02635	0.678841	0.671637	0.988338	0.757002	1.01178	0.70497	0.90009	0.781311	0.82203	0.774353	0.659587	0.603938	0.758668	0.875274	0.933358	0.810176	0.748167	1.11241	0.870246	0.748951	0.635203	0.589588	0.791327	0.712758	0.80952	0.672766	0.587337	0.810635	1.11995	0.694493	0.935191	0.727855	0.790014	0.58872	0.525348	0.608643	0.580282	0.606097	0.622898	0.719942	0.635163	0.529914	0.679302	0.535332	0.58126	0.766989	0.682408	0.491618	0.622007
1.17393	1.51165	1.29354	1.42594	2.1582	1.55783	1.81805	1.86487	1.6357	1.6472	1.82043	1.61176	1.46634	1.68694	1.83908	1.85891	2.48416	1.44267	2.5264	1.85815	1.61257	0.975419	1.2182	1.05758	1.3129	1.35726	1.07925	1.22847	2.11162	3.58577	3.80677	1.45444	1.47419	1.51162	1.11531	0.80457	0.678288	1.02529	0.838785	1.56101	1.13338	1.12269	1.08007	1.21498	0.89071	0.974849	1.07904	1.04545	1.06009	1.38072
1.11397	0.783331	0.859402	1.37705	1.08628	0.960522	1.00306	0.913242	0.948227	1.40121	1.06696	1.23724	1.02046	0.924471	1.2092	1.20752	1.07279	0.931706	1.37969	1.42978	0.88199	0.921829	1.10036	0.919709	0.820546	1.06162	1.24524	0.934492	1.77475	0.946432	0.954654	1.23744	0.922424	1.54591	0.871688	0.702099	0.601359	0.890789	0.713929	0.877732	0.835911	0.748783	0.861104	0.952562	1.01518	0.935104	1.10702	0.810307	0.89815	1.10444
0.95584	0.537317	0.593401	0.922765	0.652231	0.771664	0.752955	0.744103	0.515305	0.732225	0.621118	0.591576	0.509424	0.566572	0.81686	0.799041	0.627156	0.640082	0.909091	0.803923	0.583873	0.616485	0.467836	0.697156	0.608088	0.675402	0.604668	0.512847	0.670017	0.988924	0.617971	0.784314	0.553158	0.607128	0.547256	0.498977	0.649562	0.497711	0.460087	0.593542	0.613196	0.531632	0.528988	0.549904	0.464231	0.510412	0.691037	0.516742	0.391068	0.517893
0.996611	0.602736	0.570321	0.904404	0.775074	0.616181	0.87858	0.768285	0.765169	0.728173	0.676041	0.625117	0.507743	0.66107	0.800769	0.850991	0.784929	0.686012	1.10531	0.868206	0.773575	0.604449	0.532113	0.699007	0.684369	0.771545	0.607496	0.511745	0.707064	1.05089	0.532396	0.84538	0.614364	0.70497	0.547885	0.64612	0.570125	0.524164	0.544484	0.620386	0.71623	0.634518	0.511535	0.618659	0.484778	0.536538	0.713776	0.596623	0.482579	0.615271
0.870019	1.18217	1.22551	1.13118	1.19573	1.29977	0.984252	1.25181	1.59279	1.0354	1.03689	1.07063	1.31874	1.23931	1.45157	1.1259	1.26137	1.10913	1.19673	1.15868	1.11474	0.999101	1.14854	0.873668	0.928247	0.800128	1.36188	1.08442	1.26539	1.15206	1.29132	1.24927	0.895095	1.31648	1.06779	0.727167	0.697447	0.777424	0.865951	0.861178	0.894855	0.545852	0.958497	1.0436	1.06253	0.997108	1.11225	0.931967	1.14104	0.992162
1.02477	0.811754	0.870095	1.12573	1.47386	1.13495	1.16267	1.08432	1.17956	1.28818	1.25774	1.09665	1.08312	1.05418	1.01604	1.18054	1.29638	1.18882	1.62715	1.32788	1.31242	0.844167	0.949397	1.00785	0.96043	1.08717	0.869036	1.23062	1.5445	1.26129	0.989707	1.0338	1.06065	1.16659	0.971723	0.791954	0.987069	0.854628	0.83675	0.945895	0.938967	0.665912	0.955019	1.0618	1.02874	1.01004	1.14821	1.04145	1.11096	0.990688
1.02035	0.656599	0.894215	1.01761	0.6879	0.972857	0.859919	0.967586	0.58326	0.727061	0.621427	0.626566	0.576236	0.70922	0.850847	0.864603	0.732923	0.708516	0.759879	0.721449	0.659065	0.558971	0.526233	0.690512	0.749513	0.805023	0.656642	0.578168	0.795229	1.19803	0.731957	0.886211	0.714592	0.69735	0.540015	0.571755	0.72881	0.540833	0.609088	0.566251	0.649815	0.664982	0.579274	0.609013	0.513426	0.560695	0.692041	0.568699	0.454649	0.575275
5.58878	3.333	1.85543	1.72247	2.36038	1.42124	3.80691	3.632	4.60384	NaN	5.12584	2.99401	1.55992	4.11506	2.82709	2.31326	9.64599	NaN	4.158	1.60766	10.3461	NaN	100.002	5.61829	2.78629	1.45294	5.91331	10.5043	0.917263	1.76872	2.63082	10.451	8.49401	7.57633	7.72499	6.54493	3.51124	9.66464	3.02599	2.68018	6.91611	NaN	5.18403	5.86098	15.2474	13.6106	4.3033	3.71885	11.128	10.5181
0.29341	0.430645	0.318279	0.474518	0.303638	0.379248	0.235855	0.411015	0.472791	0.201763	0.261629	0.374869	0.313666	0.475941	0.631114	0.282071	0.352286	0.153177	0.200739	0.340286	0.374742	0.189574	0.3141	0.227588	0.439213	0.305381	0.195902	0.288101	0.287994	0.58292	1.38055	1.16288	0.269288	0.20141	0.145273	0.212373	0.376449	0.266078	0.352199	0.285413	0.179601	0.269564	0.152425	0.220095	0.220863	0.109329	0.169199	0.177245	0.169136	0.161059
0.566219	0.468428	0.441579	0.628062	0.43096	0.637267	0.561073	0.446628	0.528988	0.565131	0.588028	0.37319	0.536509	0.32911	0.436967	0.449337	0.486169	0.522876	1.02369	0.420415	0.575043	0.591611	10.8293	0.956938	1.43398	1.17443	0.463585	1.23651	1.85405	0.815994	1.30212	0.462449	1.11516	0.48209	0.835841	0.937383	0.556793	1.16144	1.30635	0.930925	1.06562	1.052	1.37088	0.883314	1.02083	3.40994	1.04066	0.823655	1.14382	1.05166
0.171277	NaN	0.356366	0.0810242	0.142003	0.0981354	NaN	0.669972	0.614779	NaN	NaN	0.214091	0.202257	0.176261	0.181117	0.201719	0.173238	0.139864	0.259875	0.168885	0.105032	0.195679	10.2265	0.228128	0.225744	0.121353	0.513664	0.528877	0.15404	0.131337	NaN	NaN	NaN	0.284051	0.25382	0.551907	0.206054	1.0633	NaN	0.297894	0.428064	3.87282	0.501253	0.198566	0.710328	1.42763	0.1603	0.308957	0.313509	0.899604
0.0499077	0.0617741	0.116945	0.112221	0.0817194	0.128302	0.0249041	0.118194	0.196263	0.0589657	0.158559	0.133403	0.102948	0.0819605	0.091416	0.105235	0.181673	0.0669658	0.15756	0.0621079	0.0842176	0.0696864	2.17146	0.623208	0.19529	0.104248	0.0569152	0.150791	0.0408965	0.289276	0.133819	0.125878	0.163295	0.119242	0.390198	0.141571	0.336553	0.223549	0.0868432	0.261575	0.131733	0.417781	0.138852	0.0895816	0.209021	0.203525	0.0953016	0.258866	0.15277	0.215058
0.383156	0.235582	0.377287	0.314169	0.186487	0.28512	0.406438	0.995223	0.383171	NaN	0.292637	0.277254	0.209815	0.40715	0.266035	0.236446	0.305923	0.306373	0.279143	0.338055	0.285845	0.454401	6.71502	0.496648	0.614742	0.197554	0.270248	0.417049	0.282462	0.464727	0.381665	0.357296	0.421603	0.27811	0.795798	0.381854	0.771724	0.912076	0.197021	0.646078	0.637877	0.865426	0.648551	0.460978	0.83612	1.44109	0.283897	0.451223	0.630716	0.49955
1.31594	1.11107	1.50342	1.3611	1.28366	2.06582	1.52686	2.15443	1.4962	1.44346	1.39893	1.27756	1.48905	1.81055	1.12421	1.94632	1.43102	1.74801	1.08724	1.42187	1.80897	1.83459	1.25745	1.51943	2.10513	1.54347	1.45766	1.5519	1.10871	2.00662	1.806	1.5979	1.49056	1.56336	1.55502	2.31289	1.3496	1.92708	1.56011	1.83197	1.5298	1.28606	1.50283	1.59441	1.89908	2.19669	1.87586	1.70198	1.59068	1.9123
1.81363	1.23294	0.892459	0.92687	0.686106	0.818197	1.19723	0.882223	1.03974	1.15383	1.17427	1.09659	0.883314	1.17121	0.884721	0.707714	0.866326	0.940999	1.0547	0.79447	1.69173	1.16446	1.46675	1.3512	0.911079	1.09158	1.30632	1.19086	1.1687	0.798722	0.912575	1.3859	1.23605	1.68364	1.21721	1.66656	1.26887	1.23795	0.96965	1.38188	1.1544	0.646914	1.22663	1.18454	1.26978	1.19137	1.7515	1.37018	1.35113	1.41367
0.692425	0.762311	0.461638	0.433915	0.475127	0.373357	0.726269	0.591611	0.590423	0.397093	0.548576	0.386937	0.554447	0.680504	0.674218	0.585514	0.56773	0.598659	0.724428	0.635082	0.389408	0.636051	0.830013	0.771069	0.713572	0.46788	0.977708	0.763825	0.77238	0.403014	0.588651	0.799361	0.693097	0.732225	0.643832	0.487092	0.328461	0.73497	0.458421	0.7347	0.845023	0.823995	0.821828	0.693193	0.789827	0.874967	0.842602	0.691611	0.841468	0.874508
1.64166	1.59798	1.15472	1.12576	1.64861	1.11195	1.52066	1.1755	1.71804	1.37202	1.79022	1.67462	1.20754	1.95396	1.19018	1.56087	1.61655	1.39476	1.3596	1.48891	2.56898	2.06475	1.88683	1.98381	1.31884	1.89258	1.60018	2.07956	1.73958	1.43472	1.40444	1.68754	1.74947	1.96236	2.04553	2.018	1.35159	1.55439	2.31305	1.85028	1.99064	1.27575	1.72357	1.95008	2.07676	1.92152	2.25632	1.47582	1.97656	2.13744
1.35478	1.29505	1.2068	1.00568	1.29334	1.23739	1.35943	0.923276	1.34802	1.29313	1.60377	1.33046	1.06816	1.35496	1.14828	1.13732	1.30536	1.76423	1.36642	1.24751	1.69575	1.82093	1.59013	1.25984	1.18251	1.49287	1.13598	1.41004	1.36522	1.56539	1.0076	1.76208	1.89595	1.49314	1.52258	1.21431	1.3705	1.39045	1.34142	1.45616	1.91307	0.914411	1.13808	1.36915	1.82815	2.1312	1.6302	1.62483	1.85591	1.81835
2.00337	1.86878	1.73382	2.33405	2.46506	2.4322	2.12576	2.34357	2.08351	1.5818	2.20172	1.70146	1.96167	2.36933	1.29956	2.036	2.33187	2.01082	2.09187	1.428	2.37175	2.27666	2.25073	2.01361	3.67593	2.00703	2.19809	2.37925	1.89329	1.41631	1.35254	2.35294	2.25271	2.93195	2.97965	2.64005	1.7925	2.58338	2.52513	2.99859	2.38095	2.80883	1.53085	2.2173	2.82494	2.85861	2.48219	2.68536	2.73187	2.96446
1.65142	1.30745	1.49938	1.7534	1.45476	2.02188	1.59857	2.38989	1.59645	1.13937	1.05293	1.24409	1.6756	1.69196	1.31299	0.818331	1.31975	1.72005	1.34163	1.16996	1.96309	1.49358	2.27133	1.57418	2.97309	1.60131	1.52583	1.86606	1.25951	1.43433	1.52219	1.94122	1.747	2.41616	1.75343	2.09775	1.76345	2.13142	1.80917	2.16025	1.73668	2.12757	1.27304	1.45239	2.14579	2.07323	1.62454	2.08516	1.85715	2.46895
1.9048	1.66459	1.34521	1.33469	1.45785	1.29636	1.13277	2.03107	1.34439	1.2203	1.48146	1.47586	1.27553	1.72153	1.57798	1.18117	1.25227	1.49394	1.77098	1.03359	2.6246	1.04458	2.28613	1.79003	1.19343	1.81838	1.5597	1.47953	1.25067	2.24266	1.59944	1.93731	1.40786	1.70396	2.04232	1.51946	0.77821	1.65344	1.90858	1.84237	1.85333	0.434348	1.10593	2.36273	2.24311	2.148	2.63484	2.15132	2.36368	1.87945
0.968992	0.729022	0.672993	0.566412	0.624376	0.860882	0.788333	1.21775	0.591681	0.388003	0.606723	0.570972	0.752219	0.689893	0.884721	0.603865	0.59755	0.851426	0.739371	0.687427	0.984349	0.80952	1.55562	0.891424	0.77997	0.747161	0.817662	0.707163	0.578102	0.879353	0.689322	1.01069	0.722857	0.809323	0.740193	0.721709	0.671411	1.11892	0.666533	0.809913	0.976849	0.820681	0.986096	0.928936	0.794976	1.12789	1.31778	1.05333	1.12564	1.25266
0.867754	0.833542	0.919118	0.973994	1.24025	0.727273	1.01181	0.762428	1.15843	0.688658	0.911411	0.639386	0.786906	0.894054	1.34344	0.820546	1.52581	0.82176	1.36493	0.880824	0.885112	1.11252	2.08903	1.32247	0.820412	1.32503	1.09154	1.33245	0.705567	1.4993	1.18114	1.41357	1.43813	1.12831	1.06809	1.06973	0.942596	1.38742	1.10404	0.987167	1.46897	0.885034	0.840972	1.07358	1.24587	1.14175	1.11142	1.40623	1.26884	1.51793
1.84956	1.28992	1.36129	1.22009	1.49129	1.16937	2.10438	1.28733	1.75359	1.00323	1.56323	1.65254	1.32843	1.75765	1.7059	1.33636	1.31185	1.87656	1.27202	1.57594	1.70013	2.10363	2.77308	2.30107	1.81317	1.94439	1.43031	1.84775	1.55851	1.77349	1.24853	1.93192	1.74171	2.89796	1.7153	2.36351	0.814133	1.81778	1.59071	2.03608	2.13904	1.47009	1.70762	2.13283	2.16596	2.24941	2.45586	1.95886	2.22242	2.7079
0.517947	1.0827	0.403584	0.402998	0.380735	0.49022	0.365992	0.60507	0.692281	0.439676	0.69808	0.510334	0.65548	0.517732	0.51701	0.692281	0.557476	0.645453	0.627117	0.510256	0.842176	0.499002	0.77688	0.559347	0.621079	0.498728	0.616371	0.667646	0.423334	0.687853	0.523834	0.884643	0.605877	0.685119	0.472545	0.518054	0.392419	NaN	0.665336	NaN	0.697739	0.739536	0.619655	0.701213	0.879044	0.671862	1.30163	0.786287	0.711592	0.693529
0.625665	0.589102	0.421124	0.345304	0.433915	0.382819	0.597836	0.469461	0.635405	0.414955	0.597229	0.393608	0.536913	0.636578	0.700182	0.529493	0.60687	0.572607	0.651339	0.61267	0.51994	0.755116	0.888573	0.878194	0.610762	0.487543	0.871764	0.792017	0.661376	0.431406	0.563952	0.81646	0.732011	0.780579	0.597407	0.377515	0.687805	0.762776	0.403942	0.693097	0.813008	0.840972	0.730781	0.699154	0.803859	0.840972	0.863931	0.666756	0.770119	0.922935
0.245628	0.229174	0.237231	0.134313	0.132287	0.226773	0.227133	0.237265	0.234104	0.204516	0.176448	0.235527	0.247531	0.21204	0.235399	0.140247	0.231992	0.163741	0.170891	0.142663	0.114082	0.164788	0.761209	0.260797	0.416719	0.32715	0.200755	0.310424	0.168118	0.179218	0.177538	0.243611	0.272903	0.214555	0.225693	0.253659	0.446269	0.327976	0.264131	0.393051	0.254414	0.54942	0.32305	0.238629	0.261363	0.265993	0.290748	0.291307	0.291877	0.274642
1.47306	1.36281	0.954927	0.930925	0.953925	1.47881	1.2941	1.05336	1.47525	1.14617	1.23525	1.00967	1.05724	1.40507	1.39121	1.25687	1.13954	1.58421	1.04573	1.03217	1.97777	1.0953	1.44628	1.36612	1.12365	1.23674	1.9727	1.51446	1.15326	1.13829	1.43705	1.91183	1.35672	1.64921	1.54395	1.14065	1.10351	1.52334	1.87702	1.40003	1.70774	1.45962	1.68796	1.35342	1.56055	1.45075	1.88409	1.30623	1.56326	2.14846
1.531	2.07374	1.38013	1.60195	1.17867	1.71512	1.59322	1.65997	1.90121	1.29224	1.40748	2.00377	1.58624	1.8905	1.63452	1.05719	1.52286	1.68942	1.2305	1.98598	1.42531	3.17622	1.97883	2.48626	1.94879	2.4061	1.74359	1.46962	1.32072	1.51137	1.62647	2.12152	1.8587	2.09389	2.62508	2.23834	1.4841	1.6963	2.58699	1.31733	1.76053	1.47226	1.67277	2.71983	2.38857	2.09113	2.89813	2.07555	2.79665	2.4296
0.839419	NaN	0.956389	NaN	1.03491	NaN	1.28368	1.01361	1.24381	NaN	NaN	1.10099	NaN	1.37536	1.13063	0.731422	0.926097	0.885112	0.951203	0.363412	1.30741	NaN	2.03529	2.62075	0.912242	0.970309	0.99167	1.34418	0.853097	0.96918	NaN	1.17134	1.40972	1.42442	0.976753	1.15362	0.898553	NaN	1.09179	1.13443	0.994332	NaN	2.37931	1.74892	1.50568	1.29577	2.31481	1.43029	1.34497	1.60976
0.299124	0.384143	0.562841	0.236155	0.344471	0.227889	0.375587	0.322134	0.411862	NaN	0.336281	0.413394	0.316296	0.393128	0.407017	0.506971	0.404678	0.854993	0.369864	0.342044	0.325956	0.289704	1.0651	0.493194	0.584966	0.381054	0.800769	0.281809	0.177822	0.547705	0.149694	NaN	0.567924	0.40494	0.421674	0.53775	0.5493	0.444326	0.582785	0.595557	0.474676	NaN	0.414783	0.634115	0.689893	0.643666	0.563984	0.916842	0.546926	0.577868
0.933881	1.05853	1.17473	1.06865	1.07875	1.4057	1.41874	1.59533	0.997805	0.915416	1.0353	1.05054	1.24343	0.980777	0.88968	1.74089	1.10563	1.27519	0.846955	0.841184	1.84481	1.43262	1.19352	1.01376	1.35455	1.14822	1.33935	1.31261	0.885034	1.40457	1.37184	1.22983	1.1347	1.43312	1.22692	2.55931	1.58882	1.4896	1.38404	1.61603	1.11958	1.05388	1.51934	1.27828	2.07874	1.65689	1.64493	1.35505	1.30634	1.73178
1.01064	0.771843	0.776518	1.37597	0.864379	2.34208	0.799041	1.49499	0.617932	0.838785	0.620117	1.26981	1.03642	1.25307	1.03181	0.593648	0.742832	0.772022	0.624844	0.483092	1.20671	0.92885	0.936242	0.879817	1.96773	0.914662	1.09619	0.812414	0.706364	1.31797	1.18502	0.868885	0.744325	1.47704	1.34466	1.27431	0.736214	1.41525	0.660982	1.19649	1.19457	2.68507	0.546986	1.45406	1.5263	1.38542	1.23788	1.10254	1.29276	1.11929
1.23693	0.577701	0.426167	0.413343	0.757691	0.813207	0.850774	0.7397	0.820748	0.949127	0.748055	0.804894	1.00876	0.664938	1.14011	1.89448	0.757346	0.875274	0.982415	0.993937	1.10873	1.15606	2.75399	1.04861	0.503373	2.02593	1.23768	1.38097	1.81627	0.894614	0.970026	1.08762	1.03235	1.20453	0.871156	1.47881	0.921914	1.37789	0.879507	1.42796	2.145	0.900982	1.34764	1.21579	1.59867	2.25561	1.56045	1.91311	1.5189	1.34758
0.515437	0.461979	0.624961	0.334874	0.299258	0.661945	0.262895	0.562177	0.550934	0.981451	0.638406	0.845809	0.564461	0.510595	0.625587	0.68918	0.956114	0.508414	0.656944	0.577801	0.531689	0.714439	0.698373	0.908595	0.466527	0.464102	0.773276	0.699007	0.442047	0.709774	0.979432	0.951113	0.761557	0.596516	0.648172	0.532538	0.401204	0.922169	0.276205	0.676911	0.791452	0.830772	0.435863	0.770832	1.20588	0.733999	1.06679	0.737572	0.985028	0.795988
1.20321	1.37366	0.690703	0.839278	0.961631	1.13418	1.8312	1.33488	1.31574	0.940734	1.05916	1.29875	1.26571	1.26142	1.65033	1.73385	1.11813	1.38362	1.21649	1.05093	1.85017	1.13144	1.23068	1.7001	1.02065	1.37982	1.96626	1.63023	1.48155	1.44724	1.34622	2.2578	1.91872	1.77971	1.69952	1.975	1.09521	1.40304	2.11175	1.55666	1.35798	1.30799	1.8578	1.24364	2.44421	1.61434	2.00545	1.34457	1.72259	1.75346
1.31079	0.92773	1.07012	0.856091	1.82252	1.46351	1.05462	1.5357	1.48403	1.13956	1.13495	1.33321	1.45102	1.74328	1.52616	1.23554	1.17007	1.18023	1.24598	0.811688	1.67258	1.30654	1.77784	1.32314	1.63042	1.18496	1.29391	1.81937	1.15496	1.42414	1.37851	1.33353	1.97531	1.61199	1.4839	1.84645	1.38204	2.02147	1.50184	1.82528	1.85171	1.2227	1.07859	1.52386	1.80457	2.20376	1.17907	2.71164	1.75239	1.49316
0.660807	0.658111	1.00672	0.668047	0.486926	1.57629	0.680318	1.63151	0.855432	0.377786	0.967586	0.465333	0.576668	1.13812	0.458484	0.498157	0.898553	0.429203	0.396841	0.336961	0.562525	0.766284	1.04493	1.4583	2.79088	0.727326	1.0359	1.65426	0.44611	0.724848	1.59418	0.96367	1.24273	1.04992	0.916087	1.10197	1.61606	1.3841	0.588166	0.852878	1.42869	1.55885	1.30395	0.996214	0.975324	1.16195	1.35781	0.633473	0.87727	1.07691
1.38535	1.39247	1.44976	0.875657	1.04619	1.41493	1.13225	0.870625	1.29398	0.814531	0.644953	0.925583	0.968242	1.18845	1.22942	1.02974	0.778452	0.948227	0.821288	1.11172	0.941974	1.5607	1.431	1.08041	1.41503	0.966277	1.26762	0.904486	0.730087	1.49211	0.831462	1.53572	1.04654	1.40209	1.38429	1.04712	0.881213	1.34924	1.52399	0.733568	1.29303	1.13959	1.28904	1.47458	1.52525	1.49759	1.99908	1.5949	1.97208	1.6716
1.48223	1.67171	1.31087	1.45951	1.39772	1.39146	1.15761	1.34344	1.82066	1.75883	1.44605	1.86637	1.43466	2.11309	1.56752	1.06495	1.61852	1.76625	1.17731	1.56306	1.44244	2.62206	1.84778	2.86172	1.74304	2.30023	1.9384	1.59706	1.36808	1.7448	1.68654	2.23459	1.74663	2.10557	2.36546	1.83766	0.941886	2.00008	2.02229	1.20492	1.87726	1.44538	1.25597	3.61742	2.51953	2.2551	3.46548	2.29996	2.79681	2.5896
1.30753	0.979432	0.864155	1.08503	0.39593	1.62054	1.72783	1.27872	1.50709	1.21336	1.34369	1.62317	1.05732	1.45087	1.28195	1.7111	1.07409	1.43575	1.39338	1.07433	1.52274	1.35555	1.83278	1.63052	1.15973	0.972006	2.1795	1.90592	1.20348	2.42307	1.83395	2.03886	1.51414	1.94394	1.50062	1.00283	1.22954	1.49009	0.946611	2.8097	1.39194	0.594071	1.56099	1.57225	1.6376	1.45679	1.53546	1.7092	3.00752	1.9206
1.99964	2.40999	1.46471	2.04964	2.079	2.15197	1.54579	1.63116	2.43303	1.71753	2.36972	2.48899	1.98946	2.80717	1.87491	1.08966	1.95683	2.21567	1.45368	1.71809	1.86338	3.39513	3.15318	2.9203	2.3499	3.2417	2.15248	2.09415	1.7686	1.71777	2.14165	2.85315	2.33798	2.57805	2.61986	2.64473	1.52919	2.91852	2.9976	1.43195	2.29037	1.73019	3.33845	4.64447	3.28904	2.96903	4.094	2.61158	3.70906	3.16736
0.910747	0.857192	0.898796	1.12334	1.82729	0.766401	0.840901	0.646162	1.05572	NaN	0.9995	0.862292	1.26844	1.2449	0.781678	1.00889	0.980584	1.40752	0.938438	0.677415	0.608088	0.996214	2.1994	1.1846	0.623325	1.4744	1.04085	1.51939	1.58065	1.2789	0.774234	0.995818	1.51669	1.12597	1.06425	1.12081	1.62219	1.544	1.4381	1.88115	1.22088	1.09072	0.702149	0.965065	1.99996	2.29137	1.23883	2.09674	1.15172	1.18008
1.20604	0.974279	0.57369	0.692905	0.617665	0.661857	1.23648	0.592874	0.966744	0.459664	0.677507	1.71034	0.244439	1.34909	0.975134	0.508518	0.595734	0.979624	0.437828	0.239177	0.795608	1.95156	16.8194	0.195389	1.295	0.827335	1.72191	1.7247	0.728491	1.17945	1.13532	1.60321	2.94066	1.68447	1.03033	1.02124	1.38841	2.94533	1.04298	1.04545	0.889205	3.43289	0.300779	2.41505	2.66873	2.06381	2.01402	1.03841	4.26003	1.52073
1.28647	1.44982	0.522084	1.0657	1.21265	0.755687	1.58215	0.965065	NaN	NaN	1.3866	1.3391	1.27598	0.94509	1.27637	1.22213	1.23732	1.02962	1.20288	1.20684	1.86668	0.900333	1.64623	1.21628	0.777303	0.817327	1.30239	1.61275	1.24908	1.3451	0.998303	1.79231	NaN	NaN	1.28617	1.66014	NaN	NaN	NaN	1.31757	1.62541	NaN	1.42096	1.19162	1.58408	1.42704	2.50269	1.53039	1.75049	2.024
1.64867	1.19702	1.83395	1.36086	1.40758	1.92378	1.60462	2.06705	1.54662	1.13821	1.42939	1.44651	1.49759	1.62135	1.59096	1.01935	1.42468	1.08204	1.36878	1.3678	1.65213	1.79147	1.73521	1.69402	2.57592	1.52186	1.22473	1.58592	1.69967	2.09052	2.67487	1.86905	1.59182	1.78107	1.44666	3.31148	1.43521	2.10899	2.61965	1.83587	1.75395	1.61896	2.31326	1.70762	1.57617	2.34913	2.3515	2.61575	1.6512	1.82595
0.447808	0.498331	0.320205	0.147477	0.362279	0.442126	0.701656	0.190013	0.299985	0.377843	0.441326	0.364924	0.441579	0.386563	0.371595	0.151488	0.242078	0.0841963	0.531972	0.183527	0.296939	0.497785	7.15564	0.56057	0.355986	0.501253	0.284925	1.63004	0.739371	0.306129	0.750019	0.277054	0.822165	0.20002	0.397361	1.26662	1.86713	0.927128	0.762544	0.934405	0.687616	0.646914	0.781433	0.74599	0.613158	2.29148	0.831324	1.71483	0.773635	0.729129
1.50587	0.706364	1.28556	1.25485	1.87105	1.7041	1.00186	0.96665	1.0156	1.16577	1.42969	1.4572	1.37338	1.21008	1.66719	1.64736	1.41127	2.30208	1.09056	1.08589	1.40734	2.22519	1.80385	1.31801	0.923446	1.23854	1.79308	1.50478	1.16734	2.17789	1.96816	1.76112	1.36874	1.9363	1.40237	1.59271	1.76982	1.5646	0.979048	1.09068	2.41255	1.17794	2.99527	1.67794	1.59617	1.78018	2.52544	2.62667	2.04964	1.79404
0.791828	0.771903	0.621697	0.615082	0.656513	1.49631	0.737518	0.715768	0.877578	0.750188	0.892538	0.809192	0.68264	1.03257	1.14011	0.270592	0.565643	1.32966	0.777907	0.57857	0.898231	1.09848	1.25818	1.26694	0.713929	0.932053	1.02501	0.657895	0.980873	1.16947	1.12969	1.02956	0.704424	1.00808	0.92302	0.720513	0.808996	1.92382	0.834794	0.950209	1.82532	0.398105	2.06501	1.1589	1.229	1.37219	1.00848	1.05991	1.34671	0.981258
1.43314	0.955019	1.82033	1.26889	1.73193	1.05433	1.53714	1.08903	1.0868	1.04321	1.2487	1.29057	1.34414	1.19596	1.21171	1.657	1.17376	2.05668	1.16352	1.09294	1.64788	1.67459	1.75852	1.31387	1.344	0.981162	1.61329	1.40286	0.900901	1.84768	1.87565	1.72509	1.27872	1.57154	1.22898	1.7916	2.19679	1.31125	0.7503	1.43252	2.42025	1.21659	4.46947	1.40716	1.54681	1.40302	1.92009	2.39332	1.79388	1.53372
0.411997	0.358731	0.408647	0.329685	0.228603	0.67245	0.438443	0.904568	0.660415	0.128105	0.237581	0.164501	0.340669	0.502588	0.323792	0.32041	0.32305	0.314842	0.24801	0.272688	0.274469	0.403014	0.775374	0.56205	1.54897	0.411828	0.526316	0.72015	0.185529	0.409282	0.530729	0.424088	0.421425	0.440976	0.592874	0.437503	0.410475	0.861995	1.13255	0.433069	0.416806	0.860215	0.696961	0.616941	0.682734	0.558534	0.434953	0.891663	0.701213	0.516156
0.81666	0.397867	0.739426	0.48158	0.726375	0.810373	1.0511	0.858959	0.692761	0.462342	0.430515	0.538213	0.452202	0.519589	0.558036	0.63678	0.634558	0.992753	0.541184	0.632271	0.576203	0.860067	0.812612	0.783147	0.619617	0.601504	0.927386	0.664143	0.402512	1.01012	0.875503	0.879507	0.589171	0.903832	0.790764	0.782901	1.05115	0.574647	0.564685	0.966184	0.944822	0.586923	0.952381	0.633834	1.09516	0.547855	1.08223	1.26557	1.09095	0.799616
1.93795	1.25655	1.92663	1.37099	2.00924	1.27052	1.70509	1.32398	1.76722	2.11211	1.32556	2.16085	1.4308	2.4209	2.12157	1.85271	2.1342	1.55405	1.60839	1.76669	2.01723	2.3912	3.39812	2.0616	1.3347	1.71697	1.92965	2.58766	1.84047	1.29848	1.88384	3.05717	2.54745	2.79665	2.33836	2.32466	2.05931	2.32396	2.12639	2.30219	2.78342	1.55943	1.93678	2.67215	2.54803	2.83744	2.6688	2.06761	2.88276	3.41448
1.1334	0.866026	0.70497	0.631552	0.697399	1.16833	NaN	NaN	0.764176	0.375982	0.627786	0.575639	0.757576	0.591436	1.00302	0.58827	0.659239	0.682314	0.769941	0.517706	0.618429	0.909256	0.703185	0.403388	0.652188	0.924984	0.734214	0.965251	0.657938	1.43382	1.07947	0.863036	0.718288	0.783822	0.755858	0.702938	0.580013	0.613008	1.05196	0.824266	1.34667	0.494438	1.42544	0.706564	0.861995	0.713165	1.28525	1.13164	1.05442	0.815727
0.83647	0.929887	1.0197	0.489333	0.847745	0.921999	0.697837	0.602809	0.830013	0.48209	0.473642	0.885112	0.494242	0.976276	0.496056	0.94679	0.926012	0.959417	0.841893	0.507846	1.17901	1.07037	1.3734	0.960154	0.775675	0.730407	1.19464	1.37478	0.744823	1.03256	0.496327	1.10784	0.926526	0.863558	1.37189	1.02682	0.834516	1.3988	1.34829	0.519913	0.797257	0.505204	0.894534	1.23538	1.20547	1.89222	1.39917	1.26135	1.81802	1.04624
1.10846	1.31594	0.901795	0.92285	0.87943	0.607496	1.08793	1.11194	0.973805	0.648593	1.16835	1.04316	1.13545	1.21004	1.2984	0.985999	0.865351	1.35494	0.781678	1.08014	0.96581	1.55851	2.3083	1.75147	0.850774	1.7375	1.76685	1.42207	0.79713	1.27729	0.999201	1.33027	1.87688	1.19901	1.58892	1.11812	0.837521	2.42624	1.11053	1.24051	2.7368	0.910166	1.32165	1.05151	1.40625	2.12197	1.49557	1.72443	1.47473	1.71919
NaN	0.102434	0.175892	0.124457	0.129791	0.317581	0.0650787	0.435825	0.193114	0.209406	0.184689	0.125911	0.158715	0.213411	0.0858811	0.143031	0.190676	NaN	0.245839	0.178782	NaN	NaN	1.86379	NaN	0.329717	0.245182	NaN	0.471009	0.14609	0.136125	0.157493	0.133774	0.380952	0.130995	0.192912	0.225922	0.498455	0.673945	0.222876	0.396275	0.469197	0.470212	0.352709	0.237321	0.40848	0.551876	0.312686	0.814399	0.434613	0.366099
1.72405	1.29069	1.78418	1.33601	1.50937	1.15785	1.88779	1.5723	1.32688	1.39595	1.92093	1.94175	2.14349	1.24959	1.80757	1.5624	1.30816	2.24618	2.21754	0.958681	2.54356	1.59857	2.41511	2.10877	1.37512	1.509	1.61241	1.98799	1.54347	1.40353	1.56313	2.42248	1.69569	1.77475	1.79914	2.96349	1.59444	3.78072	3.21182	1.21347	2.53331	1.33711	2.18871	1.93776	2.24648	3.33756	2.4573	2.16845	2.82518	2.28676
1.38781	1.12106	0.911245	2.04057	1.58539	1.51925	1.63369	2.11649	1.52758	0.954745	0.979528	1.12964	1.22284	1.96947	1.48082	1.19702	1.59505	1.05011	1.47517	0.948767	1.9478	1.28245	2.73965	1.38479	2.0496	1.74975	2.05681	1.82565	1.27361	1.14904	2.58652	1.83574	1.29012	2.91222	1.16657	2.15267	1.19511	2.82765	2.64676	1.2941	2.64494	1.73699	1.68714	3.08261	1.62459	2.44403	2.07366	1.64848	2.54175	1.79633
1.57124	1.09465	2.43588	1.47009	2.26583	2.14795	1.73683	1.50198	1.50396	1.10682	1.40863	1.35234	1.57342	1.4922	1.58983	1.85082	1.36255	2.85193	1.16112	1.11407	1.43614	1.98004	1.85901	1.61316	1.39833	1.11955	1.94126	1.65629	1.12703	2.34033	1.85446	1.75402	1.82729	2.36703	1.57565	1.79814	3.4802	1.7217	1.14481	2.08468	2.84341	1.05255	3.40379	1.72557	2.07215	2.13671	2.71518	2.93513	2.13029	2.26932
0.727379	0.694927	0.449681	0.486452	0.709371	0.693049	0.931359	0.776096	0.701656	0.601649	0.812216	1.00228	0.904568	0.937734	1.27441	0.496993	0.851499	0.701754	1.00419	0.968429	1.11191	1.11042	0.739208	0.955932	0.825014	0.728598	0.775194	1.31997	1.03717	0.629644	1.32025	1.07578	0.814332	0.905879	0.992851	1.45599	0.671321	1.20929	1.53386	0.823927	1.1999	0.935541	1.07628	1.17737	0.982801	1.26904	1.88797	1.09292	1.14887	1.34624
1.42428	1.26051	1.38964	1.18909	1.49345	2.06377	1.75226	1.85237	2.20187	1.51069	1.64693	1.80336	1.56502	2.27138	2.31986	1.27311	1.31659	2.12359	1.02489	1.32883	1.5415	1.67171	2.55656	2.92492	1.90226	2.05787	1.51547	2.19149	4.35426	3.04794	1.71515	2.33079	1.52558	1.88562	2.37473	2.61288	1.36366	2.2604	1.9992	1.66953	2.46275	1.37658	3.67633	3.97852	2.72183	3.48323	2.78792	2.05867	3.91037	2.30611
0.377401	0.330775	0.341064	0.215109	0.238983	0.407764	0.413976	0.356037	0.302316	0.445871	0.28443	0.519832	0.355948	0.374167	0.519751	0.350508	0.212026	0.243291	0.418357	0.317028	0.321357	0.163856	0.658935	0.333344	0.322977	0.253473	0.26863	0.409417	0.285095	0.31903	0.432451	0.363055	0.477943	0.486926	0.536654	0.297699	0.398867	0.605914	0.663262	0.388893	0.380851	0.39801	0.369372	0.419498	0.500175	0.502892	0.485531	0.604595	0.437771	0.715205
1.33948	1.4935	1.36147	1.8044	1.52441	1.10453	2.24316	1.05666	1.96746	0.98824	1.76891	1.38427	1.23399	1.46899	1.05477	0.949938	1.35201	1.06009	1.66967	1.01241	2.44606	1.29799	1.42058	1.47741	1.5233	1.51284	1.60865	1.3675	0.953562	1.54576	1.17073	2.0903	2.13429	2.23209	1.43868	1.59134	1.63725	1.47239	2.66959	2.02766	2.64655	0.660633	0.923617	1.65172	2.60376	1.87843	1.76451	2.67201	3.1736	2.0382
0.869112	0.735727	0.729927	0.516823	0.943307	1.06508	0.90212	0.675584	0.733783	0.427223	0.741235	0.739536	0.700869	0.841043	1.31079	1.85763	0.935716	1.44361	0.610128	0.800128	0.963298	1.14304	0.73373	0.877655	0.756773	0.781311	0.509736	1.03547	0.990295	0.804246	1.30494	1.47721	0.995917	1.42539	0.769764	0.974849	0.926097	1.31501	0.565355	1.04989	1.85573	0.432526	1.93555	1.14469	1.15122	0.832847	1.34644	1.43318	1.69653	1.3292
1.82166	1.38598	1.28141	1.50401	1.25997	1.44007	1.69938	2.42043	1.82782	0.935979	1.61327	1.34055	1.45824	1.82269	2.27061	1.42661	1.52219	2.59963	1.72061	1.39472	2.48595	1.87765	2.0978	2.01398	1.65175	2.44475	2.16779	2.30702	1.01598	2.19169	1.86557	2.77239	2.26598	2.01199	2.10296	1.3645	1.93934	1.6803	1.93862	1.76716	2.71128	1.43656	1.71818	2.1316	3.13175	2.775	5.15225	1.80057	2.23504	2.52825
2.99446	3.13381	1.80424	1.51149	1.423	1.98083	2.82478	3.70494	2.86755	0.940734	2.12884	1.8312	1.69319	3.13785	2.23874	1.31123	2.39424	2.18957	1.76212	2.12107	4.6644	3.58269	2.22361	2.65527	3.27268	3.51877	2.8525	2.96824	1.65873	1.41794	2.00562	4.4049	3.69113	5.31406	3.06589	2.93824	1.67918	2.36507	2.23779	2.90892	3.57411	3.56519	2.08873	3.65377	3.66919	2.99688	2.64201	3.51444	4.24484	5.00927
1.18789	0.914411	0.636821	0.606538	1.15984	1.45153	0.505331	0.557196	0.882846	1.01447	0.748055	1.05426	1.01775	1.16727	1.20998	0.910001	0.978186	1.19387	0.844238	1.12969	1.02764	1.32317	1.56543	1.12006	0.871384	0.872676	1.12376	1.06876	0.857412	1.17154	1.05089	1.50855	0.971723	1.37127	1.29579	0.988826	0.793336	1.41153	1.41959	0.859697	1.41133	0.661551	0.85317	1.47338	1.75276	1.76333	1.96773	1.56296	1.80567	1.56681
NaN	NaN	NaN	NaN	1.1307	NaN	0.724848	NaN	0.580282	NaN	1.24794	0.766107	0.641766	1.26634	NaN	NaN	0.730247	0.55057	1.03975	NaN	0.722387	0.855578	4.89548	NaN	NaN	0.793336	1.3048	NaN	0.831255	0.460596	NaN	NaN	1.62896	NaN	0.791452	0.858295	0.871232	2.2202	1.28611	1.24858	1.47877	NaN	1.88246	0.945537	1.10305	3.99409	1.32619	3.08537	1.50031	1.3013
1.00703	1.15622	0.932749	0.687191	0.839842	0.994332	0.843455	0.86103	1.20907	1.02311	1.06553	1.12312	0.801282	0.978857	0.906043	0.844951	0.802762	1.47737	0.834585	0.621968	1.07396	1.72801	1.19979	1.64047	1.07622	1.50096	1.38606	1.08553	0.79885	0.793903	1.13863	1.19076	1.09886	1.01044	1.0842	1.43627	1.11273	1.72387	1.64878	1.14966	1.4815	1.11316	1.04191	1.71922	2.06924	1.90078	1.97922	1.46137	2.06118	1.51839
2.34461	2.58251	2.52653	4.55498	4.05384	1.91578	2.64396	1.24456	3.51729	3.87792	3.71416	2.69244	4.01381	4.6117	2.5695	2.61083	2.38464	3.05334	3.37941	2.14855	2.43546	3.66341	2.7377	2.9915	1.95821	3.38707	2.14	4.39522	2.49215	2.7674	2.90453	3.47017	3.37064	6.04303	4.14972	2.74786	3.72634	3.30316	2.86344	5.8682	3.67539	3.91757	1.49936	3.47621	4.93048	5.41389	3.07446	6.54322	6.56599	3.33356
1.59487	1.80466	2.13215	1.26653	1.34611	1.19861	1.95431	1.34201	1.56235	0.990688	2.1675	2.18584	1.81182	2.37293	1.27202	1.55478	1.24524	1.53674	1.51876	1.7798	1.44236	3.64844	1.72194	2.43356	1.08602	2.12305	1.66633	2.58552	3.31906	1.91512	1.2284	2.22346	2.23314	1.71239	2.62316	2.38926	1.79167	5.59848	3.14347	1.55176	2.5894	2.3912	2.76709	2.00349	2.29531	3.84394	1.4792	4.22155	2.4769	1.76432
3.88289	4.72925	2.53357	2.936	3.20082	2.6842	3.55416	2.23359	4.52817	2.68161	3.63293	3.72051	1.87343	5.75573	2.63116	1.52667	5.84283	1.30966	3.0125	3.75813	6.92042	4.9645	4.11066	6.84416	3.91359	4.26439	4.95074	4.52775	2.3809	2.41633	3.12402	4.38212	6.71547	5.44188	5.58503	3.73204	4.21941	3.81011	3.97978	7.09622	4.41267	2.6275	2.0591	6.91037	5.79643	5.66604	5.52303	5.64717	5.16796	5.84419
1.08498	1.00761	0.935104	1.17253	1.04474	1.07964	1.19602	1.19808	1.06018	0.521812	0.858369	0.900171	0.552181	0.882145	1.15492	1.96943	1.28584	1.18841	0.894534	0.778452	0.95813	1.17115	4.09853	1.14265	1.26181	0.952744	1.33551	1.70535	1.20767	0.977708	1.15666	1.24188	1.40521	1.32529	0.94688	2.69818	3.57066	1.14166	1.16632	1.03776	2.47592	0.576668	3.37861	1.21239	1.49236	1.96244	2.3771	1.46439	1.43342	1.51869
1.52653	0.623364	1.06489	1.1427	1.11874	0.769349	1.31872	1.06717	1.08217	0.861252	1.1137	1.21947	1.18229	1.33565	1.11692	0.910996	1.11127	1.08454	1.12854	1.12424	1.76731	1.62443	2.47911	1.31997	1.03757	1.20799	1.37018	1.18332	1.11859	1.04109	0.987654	1.81511	1.29388	1.93968	1.15481	1.61457	1.835	1.87786	0.600601	1.66564	1.71942	1.74938	1.23019	1.31349	1.66495	2.3672	1.3209	2.65498	2.24613	2.65972
2.14569	2.32493	1.304	1.59875	1.88494	1.37374	2.00481	NaN	2.04466	0.900171	1.33023	3.08575	1.44084	2.4942	0.94304	0.81626	2.08325	0.975039	2.47598	1.58655	1.7924	2.10018	2.69049	2.31669	1.22915	1.68939	1.92138	1.38552	1.44559	1.55584	1.40605	2.49252	2.11878	1.44791	1.96959	2.92321	1.79986	2.12956	2.76955	3.14485	2.74952	NaN	1.6314	2.67487	2.2704	3.36882	1.48293	3.52622	2.94655	2.39814
0.25346	0.425695	0.285902	0.351964	0.363835	0.220347	0.369631	0.38841	0.356964	0.350091	0.33456	0.193394	0.398311	0.711339	0.208212	0.426585	0.405548	0.203965	0.292278	0.294083	0.347899	0.333244	0.706015	1.17411	0.422083	0.734376	0.292963	0.564143	0.356633	0.361507	0.372856	0.456558	0.583295	0.360321	0.279924	0.425949	0.403193	0.74096	0.517277	0.552639	0.721293	0.332116	0.404318	0.366314	0.965717	0.541213	1.06165	0.93362	0.700329	0.640369
1.15419	1.00732	0.852515	1.25831	0.912326	1.51387	1.23885	1.32956	1.30125	0.929714	1.14021	0.771545	0.783883	1.22351	1.291	0.542152	0.975705	1.31947	0.860882	0.870474	1.14599	1.2732	2.07275	1.7839	1.24513	0.874202	1.92879	0.803859	0.615309	1.81815	1.14704	1.36472	1.26549	1.46152	1.46137	1.51826	0.981643	2.3847	1.38307	1.41641	1.55183	1.12255	2.42383	1.5728	1.77453	1.89477	1.63201	1.43051	1.92241	1.44686
0.759821	0.591576	0.255552	0.400786	0.325425	0.224911	0.283575	0.253601	0.533846	1.58278	0.385	0.35495	0.375488	0.611097	0.960061	0.215554	0.346633	NaN	0.532935	0.59499	0.881213	0.756086	1.1324	0.564685	0.315836	0.734376	0.482369	0.629921	0.25113	0.206283	0.755572	0.526759	0.54339	0.534188	0.783269	0.543449	1.06331	0.44601	0.813008	0.737572	0.625352	0.513005	1.48454	0.843953	0.787402	0.932401	0.962557	0.574547	0.799808	0.902935
2.03417	0.880747	1.51181	1.21643	1.41545	1.70054	0.669972	0.620386	1.5157	1.66453	2.04591	1.7001	2.17908	1.45368	1.91799	2.97983	1.37631	2.962	2.65625	1.35726	1.37372	1.45104	2.69847	1.29676	1.16535	1.87042	1.20363	2.56384	2.40304	2.78932	2.36368	2.23584	1.6756	2.38447	2.02593	2.48022	2.84349	1.51233	0.856898	1.57632	3.72634	NaN	2.48738	1.84939	3.59054	1.55145	2.64957	2.5271	3.37336	1.67485
1.49894	1.07081	0.901795	0.658068	1.06299	1.28139	0.918864	1.14683	1.14604	1.0536	0.871536	1.13062	0.825287	1.22429	1.42851	0.873897	0.751993	1.10187	1.10021	1.32721	1.79901	1.3718	1.2867	1.7242	1.21794	1.76069	1.08828	1.96305	1.08294	0.955658	1.41042	1.47042	1.3896	1.87192	1.28976	1.16697	0.962186	1.99529	1.10735	1.09724	1.43043	0.933184	2.70863	1.95867	1.48238	2.61527	2.08346	2.29437	2.84843	1.61327
0.782044	0.544989	0.488472	0.357807	0.548065	0.775254	0.561829	0.890789	0.445812	0.247237	0.358822	0.338891	0.927988	0.44117	1.78811	0.720721	0.222539	0.349174	0.381913	0.460236	0.546329	0.421478	1.17374	2.11824	1.34025	0.969274	6.24961	1.45724	0.410206	0.673537	0.727749	0.9758	0.879817	1.00331	1.04656	0.820479	0.577467	3.64325	0.393236	0.685072	2.58138	1.65659	0.536308	0.799233	1.04457	2.16581	0.834934	0.876962	3.93236	1.5103
1.4643	1.4278	0.811227	1.0774	1.72268	1.12447	1.38188	0.631074	2.12526	1.87878	1.33131	2.75756	0.922935	1.85943	1.72037	1.87452	1.86965	2.3139	1.35597	1.21767	1.42025	2.65583	1.51062	3.39259	1.41784	1.99187	1.65369	1.51178	1.39165	0.723275	1.29378	2.59585	1.92504	2.27874	2.66439	2.20619	0.948227	1.62506	1.48122	1.65981	2.21833	1.49961	2.34379	2.83246	2.79924	2.60234	4.84637	1.99489	3.60555	3.03619
1.52411	0.824674	1.36151	0.990589	0.975039	1.49463	1.38821	1.27008	1.18895	0.930492	0.650999	1.15686	0.68956	1.1366	0.979912	0.903751	1.09463	0.849618	0.838293	0.728279	1.27907	1.22745	1.79672	1.12996	1.25926	0.842034	1.05012	1.14854	0.667601	1.68779	1.34738	1.58018	1.23347	1.99876	0.977613	1.93738	3.30327	1.13495	1.39532	2.09336	1.18517	0.822571	1.30791	1.87105	1.57023	1.08105	0.995025	1.7924	1.80025	1.32069
1.55773	1.15703	1.16652	0.999301	0.973331	0.917768	1.34602	0.951384	1.15156	1.02962	1.27662	1.21392	0.931012	1.46173	1.52161	0.812546	1.20213	1.52565	1.15417	0.860733	1.66254	1.33535	2.2804	1.35126	1.40913	1.06622	1.51032	1.86665	0.879585	0.921234	0.993443	2.33781	1.81505	2.33913	1.4181	1.13696	1.06083	1.75091	1.77019	1.62959	2.36759	2.05855	2.1716	1.49198	1.76435	1.89566	1.68144	1.96086	1.91333	2.43843
1.104	1.27675	0.748727	0.390046	1.02079	0.746436	1.43488	0.650322	0.813537	0.363597	1.26358	0.912575	1.34331	1.31534	1.2096	0.632791	1.34248	0.785361	0.637146	0.653083	1.53085	0.873363	2.55748	1.55666	1.41806	2.36261	1.30818	2.01686	1.00592	0.847889	1.51906	2.51446	1.80317	1.57085	1.30813	1.03619	0.905223	1.25277	1.22504	1.70867	1.71544	1.07519	1.07618	1.83355	1.58461	2.65421	1.31106	2.15703	1.37372	2.63838
0.977708	0.655738	0.518591	0.508647	1.81782	0.595486	1.02173	0.700084	0.652955	0.649266	0.719632	0.646789	0.626135	0.953834	1.11485	0.478354	0.233525	0.523505	0.677094	0.514218	1.09273	0.913659	1.81068	1.0964	0.725216	1.20912	1.41193	1.75239	0.567247	0.897505	0.938615	1.20202	1.53067	1.24988	0.926097	1.20932	0.806322	1.37453	0.615385	1.15307	1.34316	1.14409	0.899523	1.19094	1.71647	2.04608	0.805867	1.08764	1.8895	1.12582
6.38529	5.18941	5.6123	3.23269	2.68104	1.43637	3.66865	4.35958	6.60546	11.724	4.30923	4.23872	4.27734	9.58957	2.62605	1.51522	4.81696	2.0839	4.19516	7.61673	39.3406	6.41437	6.40123	4.60745	6.23714	4.17833	4.65636	6.15195	2.44547	2.37552	2.83078	10.3916	7.49008	9.9108	8.29944	7.68049	18.3993	7.4228	9.31272	10.3664	7.4173	11.9972	6.48466	7.39919	8.10241	5.46866	5.36942	5.95061	8.71992	13.2298
2.16581	0.606575	0.940734	1.88939	2.00196	1.46265	1.21984	0.513848	1.25625	1.087	1.80151	2.2302	1.3112	2.12184	2.09021	1.22279	1.53806	1.68574	0.872296	0.568473	2.21352	1.98472	1.03742	2.01382	1.70692	1.3221	1.49127	1.41802	1.21659	1.51284	1.45243	3.20297	1.56848	2.794	1.76625	1.61145	1.18874	2.64243	1.95458	0.814465	2.17302	NaN	1.4884	2.64319	2.78226	1.53417	2.30819	1.83096	3.2307	2.68133
15.3391	5.74779	3.79766	7.76036	4.36872	19.9876	4.6183	4.18375	2.30187	NaN	59.011	2.6612	3.97314	3.68365	5.51177	3.43619	13.0784	4.04089	16.5379	2.29484	7.89765	7.66401	75.7633	7.06964	9.51928	4.94218	4.61574	10.8689	4.87852	8.10504	5.69996	9.79432	7.38607	10.5268	5.20616	17.2337	6.96185	6.06649	8.03277	15.6964	12.2573	7.43771	100.785	21.357	12.7191	25.413	5.3183	21.2413	20.3737	12.404
0.765814	0.702642	0.729235	0.677461	1.16282	1.2985	0.688184	0.592698	0.987069	1.0168	0.819941	0.632992	0.915164	0.832362	0.693001	0.376932	0.727379	0.953471	0.5124	0.692377	0.634759	0.818934	1.07039	0.989609	1.05372	1.26014	1.59785	1.01229	0.542358	0.835143	0.516422	1.16528	0.835631	0.893256	1.24414	1.12406	0.703235	1.50053	1.20843	0.699447	1.20223	0.940115	1.221	1.67974	1.53516	1.39474	1.35503	1.17189	1.90378	1.1485
1.67878	0.883705	1.53797	1.48421	2.488	1.55693	1.85922	1.10025	1.80999	NaN	2.20731	2.3341	2.05461	2.38646	2.71998	1.41107	1.87098	1.83459	1.2983	1.44022	2.26045	2.4499	1.81186	2.4995	1.87593	1.96483	1.65308	1.24997	1.22036	1.92359	2.18761	2.82701	1.98728	3.24928	3.81519	2.3644	1.11488	2.37727	2.22811	1.61434	2.03467	NaN	1.72491	3.1743	2.90444	1.42533	4.79157	3.64458	4.17973	2.01743
0.109912	0.156649	0.129251	0.0582988	0.0586132	0.198764	0.0898473	0.249433	0.11955	0.0762777	0.247457	0.185041	0.485225	0.139974	0.211439	0.1838	0.110568	0.142564	0.0728969	0.179154	0.099691	0.208103	0.821288	0.197699	0.151394	0.0860807	0.1543	0.135362	0.0809979	0.220041	0.3431	0.137659	0.18854	0.259309	0.284746	0.074744	0.41154	0.230963	0.0548276	0.194333	0.500927	0.249588	0.583601	0.137618	0.211663	0.16556	0.219399	0.263435	0.1516	0.349504
1.13431	2.68933	2.30176	1.30917	3.35683	1.71984	5.06534	2.01426	3.67229	0.656858	2.63449	1.31358	1.4599	2.10221	1.79163	1.03912	4.60003	3.22768	1.73328	1.21324	3.77758	2.10442	2.85006	2.3994	10.6586	1.93885	3.73944	3.69768	1.25589	1.73584	1.28991	4.03096	3.93406	4.2821	4.19199	5.93824	2.96042	2.90175	4.10644	3.7048	4.33294	1.99689	2.43974	4.30645	3.78946	4.15248	2.73658	5.27621	4.75285	3.52659
2.02237	NaN	NaN	2.01519	2.12409	2.44105	1.18892	1.90451	0.703631	NaN	1.15362	2.78707	1.04981	2.95727	2.93772	1.14857	1.32647	4.64511	1.38548	1.78364	1.3432	3.42278	2.59343	1.53074	NaN	1.51967	0.862664	1.33404	2.24573	NaN	NaN	3.4024	0.16334	1.06077	2.62247	1.45412	NaN	3.14861	2.12256	2.24765	NaN	NaN	2.91605	3.13332	3.67688	NaN	2.81381	2.58772	4.0308	3.69863
2.86009	2.20124	2.35029	NaN	1.69719	1.16579	3.36598	2.48632	2.11936	NaN	2.3278	1.79863	1.8884	2.75482	1.62707	2.44996	2.45779	2.8239	2.03029	2.15035	3.97519	2.19289	3.41029	2.15448	2.65541	3.11255	3.23185	2.66347	1.52716	2.42084	1.2848	3.35864	4.03942	5.23889	2.68521	2.20148	NaN	NaN	3.67107	3.87492	3.05157	NaN	2.85307	2.62867	4.28522	3.34102	4.12524	4.88257	3.92727	5.41008
0.755059	0.730407	0.678288	0.320914	0.228477	0.597514	0.344899	0.786906	0.443931	0.247795	0.398058	0.32585	0.551663	0.376308	0.680504	0.395366	0.566444	0.681663	0.450369	0.28235	0.744712	0.513611	0.963206	0.716949	0.578938	0.523368	0.362214	0.298463	0.443223	0.958957	0.891266	0.727273	0.382848	0.469087	0.618238	0.496524	1.32965	0.489045	0.588547	0.882613	0.988533	0.627117	1.33474	0.509269	0.700378	0.721761	0.818934	0.919794	0.606171	0.523615
1.25772	1.07257	1.43154	1.25778	1.91611	1.7158	1.24671	1.33191	0.951656	1.00629	1.17022	1.50823	1.40422	0.835352	1.0774	1.29873	1.41099	1.85912	1.11282	0.940026	1.57161	1.60333	1.86359	1.38211	1.45167	0.954563	1.70573	1.69016	1.00889	2.0307	1.72022	1.55087	1.26589	1.86119	1.19404	1.9906	2.83744	1.419	0.606723	1.95959	2.80183	1.14713	3.50275	1.70213	1.48971	1.72005	2.79861	2.85527	2.01519	1.67864
0.906208	0.693289	0.891186	0.67838	0.874279	0.984543	0.675402	0.546538	1.01145	0.706115	0.648256	1.1092	0.883002	1.08425	1.07053	0.853024	0.896057	1.09659	0.757748	1.07402	1.12434	1.26103	1.43197	1.0516	1.19312	0.751541	0.967679	0.82481	0.733622	1.12653	0.880282	1.45012	0.987362	1.17655	1.05313	1.38512	0.581937	1.41541	1.52667	1.13671	1.20369	1.14215	1.15406	1.68671	1.29061	1.48591	1.66875	1.41987	1.96225	1.42812
0.808015	0.506842	0.650026	0.569801	0.773276	1.22693	0.868734	0.735781	1.05222	0.529745	0.66769	0.496278	0.949217	0.800897	0.527788	0.529773	1.14074	1.01567	0.738661	0.686955	0.787836	1.3382	4.21212	3.24349	1.60901	1.06886	1.54871	1.66928	0.81182	0.499625	1.01463	1.04496	1.89617	1.30409	1.54252	1.2133	1.66041	1.20449	0.567022	1.8207	1.76174	0.953471	3.29153	1.19363	2.13986	2.01025	1.76803	1.76844	2.00666	1.88048
0.88308	0.697739	0.690608	0.44601	0.889442	0.616371	0.638937	0.841538	0.646371	NaN	0.764234	0.672133	0.550025	0.673446	1.17887	0.724743	0.70927	0.631513	0.846597	0.44607	1.0368	0.749794	1.34876	0.905715	0.788084	0.874279	0.754489	0.746714	0.734107	1.00749	NaN	1.00432	0.736811	1.1562	1.02361	0.910747	0.372814	0.845881	0.830289	NaN	1.02263	NaN	2.4108	0.799297	1.02123	1.37806	1.41983	1.43874	1.61747	NaN
0.906043	1.63193	0.749288	0.74195	0.872829	0.871612	0.978857	1.00408	1.00861	1.17705	0.959785	1.31724	1.00169	1.2064	1.06058	0.487353	1.02487	0.808407	0.841255	0.923276	1.00159	1.64864	1.52992	1.90389	0.959877	1.25111	1.36951	1.06423	1.14546	0.735132	0.93932	1.2328	0.903832	1.03241	1.33651	2.68399	1.04506	1.43604	2.1042	1.25084	1.17512	0.499126	2.00916	2.15438	1.74883	1.94579	2.84981	2.12581	2.01731	1.28778
0.967679	0.629168	1.03007	NaN	1.2565	0.776578	0.781678	1.25717	0.817595	0.799041	1.34047	0.979912	NaN	1.23813	0.663394	0.560884	1.58444	1.78686	1.20901	0.634437	1.16839	1.33543	1.73801	2.00417	0.732386	0.995818	0.907441	1.75061	1.70065	1.35999	0.573427	1.28197	0.8259	1.12601	1.37423	1.46944	2.6837	1.53391	0.897666	2.38874	2.21435	0.912242	1.76252	1.50349	1.81894	1.32286	1.7362	3.73469	1.79404	1.32947
0.35317	0.41869	0.38844	0.258612	0.374378	0.437809	0.352361	0.607165	0.661026	NaN	0.38088	0.563222	0.378573	0.373902	0.664319	0.157806	0.356379	0.54227	0.229853	0.340391	0.317541	0.507975	1.35693	0.793273	0.568279	0.363095	0.368813	0.506278	0.339974	0.441092	0.407714	0.628022	0.631832	0.547555	1.09352	0.388425	0.630915	0.909091	0.249613	0.314832	0.429424	0.746157	0.628022	0.681524	0.990982	0.40563	1.07925	0.726955	0.788644	0.964692
1.38099	1.44142	1.02506	0.911993	0.727802	0.726639	0.725111	0.79233	1.888	1.65574	0.839137	0.981162	1.12486	1.52309	3.61664	0.628536	0.785423	0.482532	0.684556	1.40197	0.971345	1.7319	2.65351	1.3648	0.627943	1.18828	0.981547	2.00204	NaN	0.699545	1.52961	0.909587	1.56272	0.913826	1.70468	1.0346	2.83905	1.63806	2.8456	2.86952	1.76513	1.18099	2.64341	1.42021	1.92071	3.14327	1.2467	2.43647	1.55178	1.28909
0.476554	0.193278	0.714388	0.773216	0.374925	0.506355	0.401816	0.404351	0.374279	0.388154	0.274379	0.538097	0.715308	0.472322	0.29036	0.637511	0.244004	0.313824	0.593648	0.24785	0.255115	0.24809	1.19803	0.651126	0.55605	0.370769	0.271407	0.810635	0.2052	1.13859	1.19593	0.396134	0.725584	0.271378	0.489165	0.417641	0.573789	1.06919	0.890869	0.45296	0.437522	0.588201	0.744325	0.671547	0.714439	0.600564	0.40987	1.44223	0.670691	0.432077
1.32867	0.740357	1.39509	0.998602	1.56593	0.805477	0.983574	0.618582	1.02282	0.676453	0.98561	1.66149	1.03877	1.11694	1.87434	1.32501	1.39456	1.69076	0.780579	0.890155	1.10402	1.43808	2.12662	1.71427	0.651933	0.805347	1.20185	1.2055	1.24451	1.75513	1.51226	2.93186	1.41999	1.85932	2.18895	0.811096	0.589345	1.70123	0.658068	1.37559	1.51446	1.05367	0.507434	1.93495	2.79236	1.33305	2.08086	2.06791	3.28785	1.89894
0.781861	0.826788	0.55534	0.60595	1.01458	0.998303	1.12173	1.2008	1.24162	NaN	1.46041	1.21789	1.16694	0.805997	1.16812	1.03381	0.717206	1.08582	0.976562	0.591961	0.964227	1.62633	2.6154	1.79215	0.653808	1.18439	1.65328	1.72345	1.41874	1.26976	1.79491	1.30205	0.975515	1.29219	1.26365	1.66461	1.67684	0.980008	0.796876	1.54455	2.65943	1.03838	3.16556	1.29057	1.86909	2.23649	2.33787	2.14887	1.54974	2.48201
0.852733	0.811688	0.718339	0.801475	0.999301	1.20244	0.720825	0.598194	1.27167	0.644538	1.00894	1.02811	0.763825	0.889442	0.915499	1.35439	1.11363	1.44163	1.13814	0.582785	0.865576	1.19063	3.57564	1.76215	1.26541	0.974754	1.08546	2.37113	0.967024	1.06875	1.62991	1.23611	1.23781	0.880902	1.33264	1.51277	1.18867	1.47732	0.878889	1.7723	1.74618	1.11858	3.42208	1.38637	1.80349	3.35267	1.98708	1.85912	2.14648	1.37099
0.835143	0.643583	0.862962	0.894294	0.8967	1.00744	0.962001	1.02435	0.951928	0.669478	0.563539	0.88098	0.963391	0.628614	0.984252	0.689132	0.987362	1.16473	0.922594	0.752672	0.718081	1.33601	0.942241	0.656383	0.877809	1.25778	1.32029	1.067	0.683434	1.34642	0.948947	0.972668	1.0041	1.05006	0.87382	1.55034	1.79743	0.598408	0.678334	2.13256	2.71636	0.67245	1.47501	1.30275	1.09359	1.07057	1.87326	1.77085	1.14331	1.11701
0.563317	0.777001	0.933968	0.434802	0.368827	1.00151	0.680411	1.47556	0.643625	0.439889	0.411184	0.56494	0.672043	0.686153	0.429092	0.438481	0.497834	0.410846	0.375178	0.600276	0.494413	0.978282	1.77138	1.09245	1.29212	0.23365	0.661726	0.614817	0.336984	0.51573	0.916842	0.56057	0.700378	0.687522	0.726955	1.30858	1.79504	0.949758	0.661288	0.566059	0.834237	0.878966	1.87094	0.862962	0.754375	0.821018	2.75414	1.37005	0.922594	0.714133
0.795608	0.42673	0.585001	0.47524	1.54856	1.23721	0.803277	0.750976	0.989315	NaN	0.790701	1.07262	0.874126	1.07187	0.94038	0.52367	0.832986	0.716486	0.656685	0.675311	1.28996	1.10204	1.09512	1.05766	0.974184	0.874585	1.37939	0.87321	0.724008	0.953289	NaN	1.47057	1.08625	1.31418	0.969744	1.24336	0.528597	1.75954	1.73094	0.656599	1.22172	NaN	0.570028	1.4184	1.21143	0.963762	2.90394	1.55301	1.60777	1.96603
2.04407	1.24757	1.21893	1.52388	1.31377	2.11945	2.52774	1.72673	1.56868	1.16667	1.22003	1.68245	0.996413	1.41912	2.13826	1.65788	1.80914	1.31937	1.68214	1.3407	2.00731	2.27005	2.50038	1.35971	1.76193	1.06141	1.74325	2.25378	1.35614	2.02671	2.22459	3.16756	1.92987	4.26967	1.84027	4.48611	1.74654	1.97938	2.98036	1.81544	2.03426	0.915583	1.88253	2.94109	2.53846	2.51345	1.47859	2.82064	2.96454	3.00734
2.04796	1.29722	1.29002	1.1458	1.30536	2.01878	1.94382	1.70033	1.5294	0.973047	1.13291	1.86581	0.991277	1.52961	1.94507	1.38284	1.66681	1.33522	1.23842	1.22161	2.06462	2.47942	2.57274	1.52142	1.04379	1.33234	1.80597	1.56497	1.27018	2.28462	2.12184	2.74018	1.48907	3.48687	1.58519	3.50656	2.20211	1.89635	1.66589	2.32704	2.25012	1.20626	1.87245	3.01486	2.3847	1.95221	1.59903	2.72272	3.41134	2.62764
0.83682	0.580855	0.812612	0.662208	0.710177	0.77238	0.677094	0.737191	0.798914	0.647123	0.625978	0.87943	0.502058	0.767283	0.560664	0.546358	0.771426	0.476258	0.581429	0.549874	0.950299	0.83956	1.93039	0.802955	0.735132	0.449923	0.706664	0.709774	0.387372	0.853752	0.887863	1.24111	0.853607	1.16531	0.832224	1.2478	2.01175	0.795671	1.3928	1.20111	1.09843	0.543715	1.51307	1.09733	1.20126	0.961169	0.52293	1.34918	1.15632	1.08506
0.806322	0.733353	0.731743	0.376889	0.74184	0.844951	0.839278	1.29272	0.910166	NaN	0.566893	1.23684	0.530026	0.951294	0.931012	0.861104	0.798403	0.940822	0.389378	0.596232	0.99681	1.22656	1.23103	1.39612	0.937295	0.841397	0.89662	0.622161	0.371319	0.81626	0.413001	1.27892	0.879894	1.1567	1.35809	0.949217	0.464533	2.07956	1.60981	1.19056	1.01989	0.775615	1.03233	1.88594	1.85642	0.858959	1.89466	0.699105	2.16535	1.74724
1.64349	1.13006	NaN	0.734484	1.09829	1.0683	1.06325	0.821558	1.19624	NaN	0.769172	1.00499	0.957304	1.44823	1.20555	0.718907	0.997904	1.0992	1.11429	0.833194	1.07614	1.34784	2.12576	1.34618	1.08796	1.02015	1.30448	1.37148	0.907853	0.925412	1.10608	1.42361	1.46449	1.53662	1.0691	2.02947	1.1529	2.01203	2.40437	1.67395	1.88303	0.950299	2.28922	1.3308	1.51522	3.14386	2.09916	1.82455	1.73379	1.57542
1.47001	1.48624	1.26756	0.732225	0.807102	0.879198	1.41967	0.915835	0.633995	NaN	0.760456	0.940026	0.663834	1.10916	1.39318	1.56057	0.716076	0.585514	1.04833	0.928505	1.53231	1.74016	3.83303	1.51078	1.33885	2.56595	1.57072	1.65106	0.68055	0.936505	1.0308	1.47022	1.26113	1.46411	0.932749	3.19061	1.39266	2.47274	3.05129	1.51842	3.34213	0.961169	2.85339	1.67193	2.1879	2.77531	1.22538	2.16948	2.23125	2.25033
1.41359	NaN	1.38477	0.673038	1.61527	NaN	NaN	NaN	NaN	NaN	1.12706	NaN	1.1066	1.5477	1.90592	0.667111	1.237	0.765873	NaN	0.867152	NaN	1.24562	1.48547	1.62067	0.990001	1.81709	1.54524	1.33769	1.96549	1.97176	1.09041	1.55921	1.27861	1.23799	1.21081	3.99616	1.81146	NaN	2.01143	1.21957	1.36153	NaN	2.15253	2.38555	1.72286	1.77233	3.12149	3.03601	1.59086	2.86033
4.05219	5.42094	3.31093	1.86867	4.06256	1.29222	4.09249	2.31096	3.65003	0.825968	2.76618	2.04399	2.09389	2.78994	2.8855	1.64414	2.69804	2.55421	2.66937	1.5703	4.16476	3.8004	11.9826	4.87662	3.40669	4.84379	3.42747	3.77501	1.41943	1.44026	1.73629	4.84896	4.60978	7.26006	3.71457	4.19745	5.71331	6.06612	5.52029	5.30138	8.73362	1.93829	2.44427	4.75511	5.01303	6.93241	2.95622	4.95025	6.8018	6.80226
0.993838	0.968804	0.92302	0.641849	0.888968	1.06194	1.1525	0.74366	0.955384	0.735781	0.9994	0.87108	0.891583	0.942685	1.01788	0.550721	0.788706	1.17306	1.05077	0.516049	0.924813	1.08452	1.1259	1.04868	1.10308	0.830565	1.26854	1.68779	0.859623	1.10143	1.17253	0.982898	1.02963	1.22784	0.83689	1.9704	3.7407	0.752899	0.884799	1.93795	1.76822	1.07895	2.96095	1.22363	1.16171	0.95511	1.19993	1.68441	1.29507	1.09528
0.218905	0.160971	0.155417	0.135864	0.152695	0.232553	0.252289	0.244708	0.250715	0.131506	0.124363	0.157532	0.205541	0.243998	0.236005	0.249196	0.186116	0.2696	0.132896	0.166212	0.164365	0.37723	0.702198	0.430942	0.141959	0.172013	0.370055	0.39265	0.142521	0.28045	0.405861	0.244822	0.265788	0.206454	0.131353	0.173735	0.420504	0.269172	0.0986777	0.528095	0.457018	0.359699	0.429129	0.360555	0.422173	0.328558	0.680411	0.558659	0.397867	0.240564
0.77997	0.453412	0.429019	0.361494	0.284787	0.354434	0.417554	0.364285	0.361011	0.502639	0.419586	0.489716	0.426494	0.396087	0.38463	1.09874	0.328256	0.228734	0.398486	0.414079	0.915416	0.639059	0.594212	0.782228	0.4036	0.427533	0.559409	0.668896	0.336394	0.287216	0.418936	0.552883	0.416736	0.673809	0.363636	1.28611	0.807885	0.652188	0.609384	0.36014	0.921744	0.470743	1.86487	0.739044	0.532085	0.475579	1.5138	0.983284	0.654879	0.650406
1.10708	0.504617	0.510986	0.441345	0.842602	0.679995	1.06844	1.30479	0.505153	0.899523	0.607017	0.8142	0.505561	0.479985	0.874279	0.632391	0.93932	0.675767	1.09865	0.512243	0.659283	1.17328	2.08008	0.915751	1.62217	0.488353	0.702691	1.30358	0.716897	1.19529	1.57201	0.789141	1.05245	1.03492	0.76858	1.42633	1.7418	1.00089	0.532652	1.90836	1.45495	0.491569	1.90013	0.512243	0.936593	1.6011	1.87744	3.07664	1.07254	1.2276
0.822842	1.92171	1.15707	0.741785	0.403063	1.19878	0.667111	1.21487	1.08358	0.5004	1.05649	1.04118	0.640779	1.63671	1.05048	0.504337	1.2997	0.611696	0.468274	0.610352	0.741675	1.22444	1.51112	1.34271	1.26322	1.17463	1.02063	1.03687	0.50984	0.435066	1.48172	1.09552	1.69733	0.688847	1.53986	1.13837	1.42452	1.35452	2.70812	1.64693	2.04078	1.46323	0.858811	2.11941	1.76367	1.52702	0.857633	0.952018	1.0787	1.72262
1.57741	1.85028	1.31184	2.38578	1.85919	1.38958	1.2784	2.92697	2.29022	1.44615	1.39032	1.60223	NaN	2.56746	1.06809	0.564653	1.78763	1.29436	1.76813	0.610948	5.1948	1.91472	1.55953	1.80313	1.89387	2.44942	2.06241	1.57087	0.898796	1.03201	1.64333	4.81209	2.95526	4.03926	2.08551	1.19952	2.29326	2.81857	1.68523	3.09023	2.74236	2.3525	0.190414	3.04479	3.01923	2.35106	2.57639	1.86088	3.62175	4.09584
1.57709	0.595096	1.16917	0.675858	2.48806	2.12739	1.00236	0.938262	1.18061	0.742997	1.42058	1.18749	1.13576	1.21726	1.43744	1.35179	1.21809	2.01167	1.03415	0.676361	1.45607	1.76769	1.61012	1.43431	0.938262	0.846955	1.26957	1.2288	1.02246	2.30076	1.67135	1.6275	1.35369	2.23829	1.5607	2.15373	3.3753	1.90035	0.934841	2.26521	3.38341	0.424376	1.28082	1.70404	1.5198	1.83117	1.55877	2.71451	2.17235	1.77491
0.931706	0.894215	1.04297	0.721657	0.863409	1.08619	1.39583	0.793903	1.03635	0.855798	0.822707	0.802118	0.982801	1.05027	0.95039	0.517598	0.824878	1.44661	0.993641	0.461851	0.903098	0.976086	1.19504	0.976086	1.49822	0.808473	1.27984	1.50331	1.00166	1.1098	1.13516	1.00006	1.06592	1.29692	1.00215	2.07202	4.44741	1.0418	0.637105	2.51553	2.17306	0.91083	2.04132	1.39175	1.28072	0.958589	1.23253	1.64552	1.25965	1.0437
1.05797	1.32336	1.29534	1.25486	1.6108	1.47608	1.67121	1.1417	1.84023	NaN	1.60723	1.95756	0.537721	1.34438	0.89071	1.14303	1.23844	2.05744	0.930492	1.22134	0.631233	2.08952	2.34132	1.82535	2.20726	1.01106	2.43031	1.01335	1.21538	1.47029	1.09487	1.94288	1.62332	1.92979	1.97332	3.27246	1.21987	1.71303	1.71869	1.30822	1.3757	1.17973	2.3394	3.18532	3.57923	2.62757	3.1176	2.51712	4.00689	2.06975
0.0858885	0.0821895	0.104085	0.102771	0.0577234	0.123907	0.0799808	0.069847	0.0710631	0.0699937	0.109659	0.0465831	0.109223	0.0640533	0.112653	0.0873057	0.0961816	0.0656728	0.0722961	0.0556607	0.103845	0.130907	0.169457	0.155543	0.131562	0.0935191	0.110401	0.133025	0.0756487	0.139731	0.0928678	0.0688895	0.0795545	0.0960338	0.0984737	0.135729	0.162035	0.221459	0.087858	0.142312	0.167291	0.299913	0.277955	0.112428	0.133733	0.141307	0.163401	0.112256	0.124136	0.105824
1.20415	1.31252	0.989022	0.901063	0.864528	0.889838	1.10656	0.745156	1.16585	0.674218	1.00065	1.37975	1.26686	1.61679	0.821625	0.538503	0.788395	0.53056	1.13582	1.13614	1.52314	1.55361	2.64922	1.58416	0.803923	0.95039	1.58268	1.18776	0.916087	0.883783	1.18121	1.06203	2.33318	1.29418	1.6154	1.51119	1.56323	2.068	1.63929	1.86001	1.38912	1.38579	1.20348	1.28766	1.48039	2.27635	2.60396	2.54608	1.2224	1.51957
0.433858	0.0819672	0.165618	0.260566	0.389788	0.364977	0.142493	0.179533	0.250614	1.11914	0.613723	0.994036	0.0748111	0.212251	0.350976	0.316196	1.14207	0.39593	0.878503	1.08822	0.465419	0.558067	0.656685	1.16986	0.266809	0.294265	0.773455	0.901876	0.179733	0.510908	0.846095	0.705666	0.489836	0.527231	0.822368	0.870246	0.929368	0.829669	0.290377	0.627195	0.786287	0.719476	0.369004	0.822571	1.04985	0.658111	1.29267	0.674036	1.03149	0.928247
1.99676	2.97177	1.03186	2.07706	1.78425	2.08799	1.86668	1.84952	4.2508	1.34495	1.58851	1.68104	1.51978	3.09416	1.81729	1.16382	2.00457	1.42189	1.18099	1.45705	1.61376	4.7895	2.24034	1.76196	1.44875	2.5748	2.59464	1.07103	1.96897	4.6322	7.04225	2.94222	1.95008	1.44419	2.39	3.67229	0.808407	3.99249	4.11235	1.25544	2.19732	1.08904	4.32713	3.63994	2.14574	2.19819	2.99285	4.54897	3.16426	2.297
1.02894	0.677323	0.370316	0.979432	0.911245	0.592663	1.71171	NaN	0.722282	0.912159	0.929627	1.73211	0.455145	0.742942	0.363016	0.335503	0.808277	0.706215	1.68381	0.561829	0.724113	1.20058	3.26958	1.21863	0.467202	2.80065	2.773	0.988729	0.469484	0.693145	0.912909	0.956297	0.987264	NaN	0.949127	1.3773	0.662208	2.59977	1.8078	1.37688	3.70165	1.42786	1.2782	1.68042	1.30794	2.56279	1.89218	2.44732	2.17014	1.40239
0.643046	0.576502	0.857633	0.586648	0.352348	0.746714	0.951565	0.485107	0.662559	0.499226	0.689846	0.553097	0.688231	0.885034	0.333923	0.534759	0.348226	0.391926	0.758668	0.502033	1.53097	0.667067	0.806842	0.412984	0.850557	0.903179	0.99295	0.918611	0.338616	0.619348	0.962464	0.64512	1.45203	1.12245	0.491569	0.3627	1.02734	1.3205	0.823452	1.56964	1.43573	0.79713	0.41806	0.96609	1.02707	0.76476	1.03593	2.1708	1.16651	0.916926
1.19083	0.998004	4.10526	1.16511	0.751767	2.22876	1.22335	7.86102	1.85529	0.667557	1.7566	1.71518	0.567505	3.61102	1.15015	0.64512	4.77327	1.2169	1.15112	0.711744	0.775074	1.42193	18.9617	2.66901	2.0227	0.357833	1.36599	1.8556	0.500325	1.64061	2.35693	1.59959	2.08316	1.31563	3.31477	4.47668	1.24499	3.01423	1.88295	2.4083	2.07473	20.3558	2.19998	2.47225	2.86066	11.7014	1.62351	2.6743	1.99227	4.74001
0.91701	NaN	NaN	NaN	NaN	0.814797	NaN	NaN	1.24922	NaN	NaN	0.918949	NaN	NaN	1.1934	NaN	NaN	NaN	NaN	NaN	0.691563	0.980008	0.778937	NaN	NaN	1.13071	NaN	NaN	0.86881	NaN	1.62623	1.14451	1.34018	1.22666	1.30892	1.28733	NaN	NaN	NaN	0.931099	0.834376	NaN	0.908018	NaN	NaN	2.45688	2.14312	1.82956	1.60457	1.42128
0.356049	0.347439	0.4865	0.27619	0.279408	0.37059	0.448914	0.622239	0.38546	0.287604	0.38432	0.35935	0.341483	0.292663	0.657116	0.555895	0.377644	0.397662	0.511876	0.238385	0.364511	0.371181	1.84601	0.434556	0.392634	0.224517	0.247274	0.449559	0.420398	0.566348	0.509424	0.381723	0.533447	0.418043	0.443027	0.769704	1.73418	0.88347	0.151939	0.698324	1.00341	0.288052	1.98543	0.487353	0.356392	0.785114	0.486334	0.646621	0.517732	0.566829
1.96456	1.3631	0.986193	1.04209	1.18206	1.23545	1.56956	0.424683	1.89423	1.10721	1.57203	1.84138	0.71803	3.30764	0.68861	0.564366	1.75765	0.713929	1.40617	1.10665	1.27358	1.86133	1.94765	2.12612	1.41215	2.14975	1.70253	1.77582	0.976086	1.0824	1.07553	1.60138	3.36553	1.49488	3.0611	1.06173	2.67187	1.96101	1.28536	2.92492	2.23329	1.76314	0.538358	2.56463	2.93289	2.92766	1.69655	2.24472	1.77993	1.54991
NaN	0.251705	0.531011	0.451427	0.452837	0.504566	NaN	NaN	0.286205	0.801282	0.695265	0.579979	0.362411	0.600601	0.257268	0.287356	0.381927	0.278427	0.563317	0.244433	1.17334	0.499426	0.36491	0.443086	0.180655	0.929714	0.756487	0.665115	0.447447	0.372828	0.297947	0.719166	0.360192	0.763825	0.775074	NaN	0.623908	1.03085	0.574878	0.651042	1.8576	NaN	0.17546	0.790701	1.30252	0.905305	1.36919	0.511745	0.72338	0.686248
NaN	0.274808	0.282646	0.136752	0.096918	0.273276	0.114252	0.263588	0.164341	0.121114	0.259518	0.301486	0.504897	0.176554	0.19387	NaN	0.185498	0.146167	0.161308	0.345519	NaN	0.285845	2.08138	0.274544	0.197009	0.160023	0.25457	0.186567	0.111167	0.145817	0.163255	0.334437	0.256997	0.385327	1.35901	0.253383	0.151971	0.631313	1.3039	0.17993	0.526067	0.441891	0.264166	0.346081	0.4761	0.267165	0.414473	0.233372	0.639264	0.651126
0.777061	0.490725	1.21423	0.489812	1.19086	1.0417	2.43671	1.17572	1.03378	1.22868	1.28436	0.745268	NaN	0.785855	0.71772	1.14358	1.316	1.63615	0.977135	0.478629	0.643004	1.38953	1.27959	0.336802	0.701951	0.718288	NaN	1.27128	1.34829	1.73172	0.688942	1.26202	NaN	1.11644	1.43139	1.75337	3.48809	1.40205	0.524521	1.20961	1.62797	0.430552	2.29316	1.05986	2.26932	1.48787	1.44057	3.06636	1.90031	0.97972
0.348493	0.385713	0.348323	0.275247	0.260234	0.502336	0.182236	0.468011	0.389302	0.339144	0.397662	0.263151	0.354685	0.340925	0.291962	0.492902	0.191747	0.263317	0.338719	0.229516	0.589379	0.56494	1.09973	0.966277	0.334605	0.288834	0.606097	0.716486	0.27068	0.393654	0.673537	0.246956	0.368365	0.369113	0.316967	0.332723	1.88005	0.405384	0.298686	0.84969	1.12902	0.502639	1.2308	0.510178	0.730353	0.467902	0.856825	0.775194	0.587475	0.465875
NaN	2.68046	2.17751	2.35693	3.13372	1.72265	3.03509	1.4339	NaN	1.85491	2.15745	NaN	1.53205	3.26499	1.29462	1.69019	2.07987	1.87427	2.7202	1.96862	1.29159	2.78823	2.52627	2.31481	1.51101	1.96634	4.04138	3.72287	3.04284	NaN	1.72992	2.3488	3.02435	3.38135	3.30415	2.8664	4.59791	2.58471	1.67647	3.4082	4.84708	NaN	5.82581	2.08629	3.72884	1.50498	4.75964	4.73059	4.49499	2.64103
0.31903	0.270541	0.228243	0.174596	0.227884	0.169388	0.177469	0.186112	0.245393	0.0889521	0.168549	0.324844	0.123047	0.173922	0.39901	0.371457	0.214602	0.314792	0.219221	0.115473	0.0542977	0.174847	0.342724	0.41731	0.31142	0.147761	0.153742	0.231091	0.273217	0.16039	0.184284	0.459664	0.435977	0.171706	0.309396	0.465896	0.283913	0.462364	0.107819	0.239682	0.312042	0.413942	0.43367	0.336168	0.513954	0.26928	0.625861	0.252908	0.559003	0.292629
0.753182	0.928074	0.624337	0.376308	0.606208	0.454504	0.595983	0.48974	0.593225	0.420027	0.524604	0.516609	0.792142	0.717566	0.688658	0.354786	0.591681	0.756258	0.417049	0.529829	0.909504	0.934405	2.13954	1.59256	0.616181	1.94209	1.08196	1.10398	0.791515	0.697593	0.579475	0.837451	0.961261	0.688421	0.963577	0.661288	0.806647	2.01678	0.894215	1.09535	2.7908	1.03085	1.08453	1.02736	1.00999	2.01576	0.998203	1.63548	1.1258	1.49131
2.04641	2.49178	1.16187	2.50815	2.90259	3.35616	1.12835	2.33144	2.36944	NaN	3.5895	4.85909	1.82163	6.05034	1.82835	1.85336	5.15464	1.34927	NaN	3.67918	4.74406	5.08802	2.77277	4.85696	2.6713	2.85731	3.86533	3.70192	1.18115	2.22035	5.53006	4.94682	5.98229	6.74491	5.84044	3.22342	4.41618	3.43784	1.34356	5.61703	3.50521	NaN	0.937998	5.11457	5.7468	3.3761	3.19091	5.89588	4.42674	6.1024
NaN	0.974089	0.885583	0.907688	1.83372	1.61064	0.667735	0.936944	1.8007	NaN	1.48617	NaN	1.28148	2.06735	3.34538	2.23304	2.09398	1.34412	NaN	1.1516	1.95175	2.25454	4.12286	2.66	0.900657	1.52784	1.30577	2.43742	NaN	1.74951	NaN	3.03324	1.63169	2.95657	1.98299	NaN	2.99724	1.99041	0.976753	1.95794	4.22779	NaN	2.57407	2.67137	3.56366	3.46284	3.70975	4.28009	2.52372	2.85006
1.15664	1.16919	1.13146	0.752106	1.30422	1.77273	1.21619	1.61202	2.19332	1.18008	1.15029	1.39942	0.904077	1.69408	1.4186	0.534274	1.11693	2.11595	0.717772	0.83696	1.21868	2.36625	4.1587	3.36202	1.75815	1.55478	2.06164	1.1971	1.03174	1.2303	1.67535	2.16357	1.81048	2.0227	2.18699	2.02873	2.297	3.06391	1.76813	1.92012	1.84665	1.91957	2.31246	3.43513	3.54547	3.59712	3.24454	1.59614	4.25478	2.45032
0.505894	0.743108	0.915667	1.00924	0.702642	1.10687	0.574218	0.927128	0.99226	NaN	0.828157	1.03009	1.20893	1.16547	1.75679	0.780823	0.793777	0.873439	0.983768	0.937647	0.677323	2.96753	0.49645	1.14659	1.19609	0.616295	1.04814	1.73895	0.716076	NaN	1.17856	0.920641	1.43484	1.53358	1.09891	2.82095	2.34028	1.02044	0.549481	1.80339	1.695	NaN	1.72354	2.56259	1.77588	2.42301	1.07058	1.33266	2.97823	1.40479
1.42021	0.377843	0.707664	1.50146	0.819739	0.868508	0.611434	0.407963	1.26099	NaN	0.999101	1.22357	0.98464	1.15222	1.11032	0.855944	1.17873	0.983284	1.5965	1.01349	0.951294	1.75719	0.870246	2.33231	1.19079	1.38885	2.13311	1.11144	1.64728	0.502841	2.20794	2.73785	0.783638	1.55814	2.37158	1.0259	1.59951	NaN	2.04821	NaN	1.37022	1.22249	2.001	2.68492	2.15489	1.61007	2.10953	1.7362	2.59673	2.30712
1.00228	1.08858	1.26826	0.931272	0.48695	1.46154	1.49611	2.39429	0.935979	0.593754	0.721033	1.38698	1.06429	0.743494	2.28718	1.25872	0.829944	0.902935	0.529465	0.805347	1.27209	1.26006	2.21038	1.04313	2.3709	1.84843	1.27183	0.983574	0.59848	1.58544	0.786968	1.88157	1.96746	2.2242	1.59622	2.28817	1.3328	2.20095	1.3684	1.66066	2.19351	1.07451	1.38976	1.82532	2.85071	3.27097	2.07469	2.18079	2.52908	2.37903
2.07439	2.65175	2.77323	1.31879	1.25666	1.11633	1.89952	1.15059	1.36491	1.1282	1.68515	1.61713	1.06185	1.83786	0.754888	0.285951	1.7372	0.934841	0.866101	1.22261	4.02204	3.30437	1.94772	2.44493	1.21731	2.77809	1.991	3.59118	0.778452	0.955384	0.795988	2.92065	1.67982	2.1199	2.55931	1.62594	2.50069	3.34236	2.51351	4.48511	4.5043	2.48651	1.46289	2.49719	3.49406	2.4867	2.44529	4.59348	3.85564	4.07498
1.76407	1.79682	1.58496	1.05118	0.962186	0.894294	0.788208	0.885269	1.97219	2.20347	0.923191	1.17279	1.60426	2.08412	1.97836	0.687002	0.908678	0.788022	0.941354	1.6177	1.04789	2.09446	3.15786	1.81386	0.862069	1.62919	1.14976	2.61828	0.619963	0.670152	1.73807	1.05127	1.84815	1.40495	1.75328	1.7307	3.69891	1.90317	2.99392	3.4167	1.91296	2.44846	3.95961	1.76299	2.49981	3.59273	1.68987	3.03933	2.10948	1.3987
1.21427	0.986875	1.13837	1.58373	1.70669	1.17854	0.964413	1.27032	1.88434	0.659631	0.831601	1.49927	2.09021	1.39437	1.419	0.977708	0.858664	1.82365	0.643004	0.83661	0.687758	1.4205	1.73995	2.09648	1.93151	1.71291	1.26954	1.50978	1.43447	0.800128	1.25946	2.17708	1.9576	2.51231	2.30947	1.80704	1.23876	2.53807	0.746046	1.89018	2.2172	1.0765	1.00747	2.37096	4.25279	1.93783	2.12017	3.24149	5.25679	2.17974
2.33656	3.0373	2.08433	0.893975	0.800256	1.72747	2.73097	1.94205	0.896138	0.750638	1.6369	1.1153	0.779545	1.70602	3.05222	2.6907	1.04057	1.42806	1.41695	1.36177	2.57466	2.95308	9.37031	3.95491	1.98287	4.53494	2.38937	3.64405	0.680967	1.06785	1.15766	2.19722	2.14381	1.89764	1.71641	5.14668	4.21585	5.05331	3.6402	3.47391	9.66184	2.06309	6.75083	2.79564	5.39345	3.72398	1.59337	2.70008	6.92905	4.35426
3.75291	2.75657	2.94829	1.58985	2.9036	2.03517	3.06833	2.18723	2.89838	2.97159	2.14275	2.28509	1.31784	3.52871	2.40108	2.02151	4.0783	2.51851	2.28985	1.85584	3.57654	4.27679	13.9532	3.59144	2.05986	2.31054	1.84237	5.2626	1.44034	1.62404	1.50103	4.64662	6.29961	7.17927	2.65435	6.78472	9.50119	5.1717	3.70302	7.42556	5.19724	4.38404	2.11586	3.17803	5.2924	6.2162	2.85136	9.38086	5.50964	4.25369
1.16182	0.368963	1.36073	0.36245	0.525045	0.225882	0.465333	0.546388	0.36295	NaN	0.574481	0.362963	0.160945	0.657678	1.55943	0.317632	2.09688	2.39952	NaN	0.246706	0.929368	0.368704	31.0704	0.891266	2.74514	0.555648	0.9298	3.95946	1.04094	0.704722	0.818867	6.81106	3.57999	3.57207	2.9304	1.13332	1.82272	5.63095	0.310588	3.49004	4.4825	1.78721	2.4906	2.30245	4.88257	4.12524	1.69294	5.29465	3.92341	10.9503
0.141177	NaN	0.266177	NaN	0.0875503	0.274145	NaN	NaN	0.319285	0.120592	0.723694	0.29959	0.232547	0.353594	0.380084	0.135798	0.131185	0.209039	0.258618	NaN	0.147191	0.211327	0.778937	0.198472	0.232564	0.162314	0.16443	0.238061	0.21816	0.269593	0.954836	0.461191	0.500626	0.129166	0.262757	0.220527	0.387207	0.283374	NaN	0.326009	0.514827	0.402674	0.782963	0.374518	0.34132	0.283471	0.806127	0.347391	0.291945	0.424106
5.49179	3.83509	2.66312	3.68854	4.43912	4.06421	2.10921	7.2448	5.1083	3.79089	3.54058	3.62911	10.4541	3.37348	9.50661	6.58155	6.48424	2.47335	3.86653	3.79535	3.15467	3.96291	8.77732	5.4277	3.98613	2.64089	3.85981	2.86525	3.46729	9.22679	7.7912	8.22774	6.55437	7.16486	11.4668	2.99159	6.3857	7.21084	3.73999	2.30712	5.89345	1.72557	19.532	9.19625	8.79817	2.8097	11.9918	6.20193	5.57818	7.35673
0.257374	0.214837	0.249464	0.149153	0.184495	0.179598	0.187217	0.159423	0.236956	0.11656	0.278528	0.1775	0.0754148	0.292954	0.0597193	0.0894695	0.288609	0.0651126	0.302654	0.163736	0.194416	0.138449	0.921829	0.262109	0.252793	0.105182	0.119195	0.405071	0.20974	0.130926	0.109343	0.183581	0.415749	0.245435	0.273112	0.405795	0.802375	0.417816	0.226932	0.456309	0.402123	0.637146	0.201902	0.253762	0.583601	0.434764	0.200626	0.576004	0.314218	0.189724
1.09281	2.88467	1.03946	2.05736	0.695604	0.841255	1.64791	1.88822	1.51345	0.460384	1.38516	1.44548	1.12334	0.5773	2.39395	1.76345	0.845523	0.912992	1.12771	0.937734	2.12535	0.823859	3.55265	0.992359	1.26823	1.23538	1.42558	1.52437	1.22009	1.60457	1.61108	1.79237	1.9027	3.79276	2.38658	1.2184	2.6347	2.64536	0.946611	1.75877	4.0803	1.00236	2.35549	2.15824	2.37654	1.81366	1.55603	4.50308	4.67902	2
0.930406	0.588963	0.895656	0.548546	1.08418	0.368609	0.67595	0.698861	0.886211	0.535676	0.672948	0.464706	0.281025	0.837802	0.372898	0.229949	1.59954	0.998402	0.983478	0.217165	1.43031	0.920302	0.649393	0.956846	1.13951	1.11207	0.662033	1.22245	0.312227	1.00274	0.692425	1.248	1.41963	1.12693	0.865801	1.56534	1.88299	0.94518	0.62905	1.22273	2.22707	1.07087	0.240749	0.927214	1.67602	1.25199	0.790014	2.65781	1.09638	1.59721
1.82369	1.2469	1.10801	0.70028	1.06789	0.924813	1.70847	0.924214	1.42029	0.483629	0.670376	NaN	0.876424	1.59954	1.83254	NaN	NaN	1.2097	1.23039	0.861772	2.38373	2.25225	2.84293	1.13295	1.61674	1.38814	NaN	0.593296	1.86237	1.60077	1.41163	1.78012	1.51849	3.71485	1.38866	1.78495	4.33445	NaN	1.15369	2.42583	1.70442	0.892459	0.959049	2.06731	1.96641	NaN	NaN	3.54484	3.45435	3.40657
0.838364	2.3749	0.942418	0.716384	0.669165	1.92909	NaN	1.14659	2.40512	1.48449	1.22662	1.65868	1.41597	1.42635	2.06262	1.25907	1.39807	1.97044	1.55829	1.73319	1.32984	1.01934	2.5161	2.65993	NaN	2.24563	1.87529	2.31481	1.05718	1.42381	2.22663	2.10367	1.58962	1.16158	1.67985	2.15494	2.71946	2.90208	1.44743	3.20082	3.1955	2.7011	3.31345	1.90578	2.9915	3.8838	2.7552	3.19061	5.74317	2.5161
1.56698	1.66298	1.77233	1.26232	3.36236	1.37726	1.54866	1.38382	2.91639	2.03302	1.98291	2.09131	1.493	2.50257	1.26124	1.03321	2.63741	2.53017	1.43186	0.963113	1.65574	3.21017	6.38896	5.9499	1.78079	2.93341	1.90064	2.49887	1.96773	1.20611	6.48508	4.61318	3.17682	3.52038	4.01461	2.19727	1.65678	4.90437	2.66994	2.34687	2.5601	2.16689	2.87969	5.11797	5.17277	3.46392	6.10314	2.57294	5.48878	4.31723
2.49925	2.45658	2.41243	1.21249	2.11367	1.42276	3.92588	1.82166	2.49819	0.76799	1.37927	2.27025	1.21322	2.0784	2.07909	1.47564	2.29085	1.65857	1.63172	1.46171	4.17606	2.91053	3.96904	2.62584	3.70755	1.5896	1.80953	2.69607	1.65025	2.00425	1.65599	3.37918	2.89293	4.82556	2.18818	5.90458	9.49397	2.39223	4.18288	6.6313	3.46332	2.00618	1.82692	3.95679	3.37052	2.9274	1.65166	4.58295	4.24899	3.95617
0.663967	0.534474	0.584453	0.593296	0.261103	0.915248	0.368188	0.44839	0.553465	0.460596	0.505587	0.367647	0.413599	0.718133	0.469682	0.442909	0.383877	0.621891	0.744657	0.13928	0.492951	0.39468	1.00011	0.642426	0.528737	0.337633	0.804959	1.03644	0.362516	0.68975	0.513426	0.529549	0.748503	2.92963	0.813537	0.310347	0.823249	0.856604	0.398438	0.706964	0.925412	0.941797	0.752049	0.586132	1.42957	1.15189	0.249813	1.72025	1.0557	0.843597
1.78504	1.42181	1.12329	1.43577	1.31624	2.66404	2.0839	2.56805	1.00196	NaN	1.44647	1.43877	0.597586	1.16877	1.43458	1.36953	1.02216	NaN	1.33064	0.674309	1.23124	1.91186	2.54408	2.28076	2.76243	1.47628	2.05499	1.94265	1.73898	0.538851	1.26392	1.05725	1.8457	3.74406	1.86484	3.19632	5.5057	2.05221	2.45815	3.18117	4.04351	NaN	5.90423	2.89771	1.82428	3.79838	1.85422	2.31091	3.2496	NaN
2.09087	7.13012	1.7907	1.37593	2.96657	2.21843	1.13537	1.88829	1.79814	1.64976	2.0849	1.69892	3.091	3.51803	4.99127	1.7408	3.84275	1.9068	1.91329	0.99226	2.87969	2.42554	1.60772	4.97884	1.75322	2.87869	2.97734	4.5819	1.42009	2.37982	4.67246	3.11265	2.30134	3.4571	3.12081	1.81669	5.14801	4.27478	1.59926	3.24918	10.4537	1.05973	11.51	3.89575	6.03428	5.47495	3.6985	5.90702	4.26348	3.1109
1.97754	1.76675	2.68485	4.71032	8.62813	4.09349	1.3865	2.24175	8.83548	11.1242	2.64501	7.0922	2.70497	1.91575	3.00237	3.55353	11.1561	2.62764	11.3629	3.63412	2.62226	4.75964	9.00739	5.15783	4.73642	5.60004	7.90701	9.77804	2.06988	3.57296	6.55179	3.28332	4.05828	5.25431	9.05223	3.91175	5.09035	9.40115	7.64175	7.94218	9.0629	4.28321	6.18009	4.80862	9.45626	27.5005	8.67077	17.8504	11.7962	10.7318
0.204994	0.189595	0.272821	0.286812	0.26547	0.145326	0.23625	0.612032	0.207684	0.281849	0.228107	0.336168	0.227417	0.307012	0.20462	0.233498	0.186947	0.223759	0.370178	0.170059	0.282853	0.22098	0.341927	0.540336	0.463006	0.19489	0.34343	0.461574	0.448833	0.373916	0.455913	0.2774	0.335942	0.186947	0.220003	0.504286	0.50221	0.398153	0.349443	0.542329	0.625391	0.281754	2.13379	0.706464	0.24758	0.59011	0.625782	0.426858	0.245912	0.317068
1.97149	0.988045	1.16662	0.800384	1.53943	2.62729	0.773635	2.14546	1.98346	1.19809	1.42538	2.04629	0.932488	1.71774	2.05766	1.35726	1.97589	1.21402	1.41969	0.751033	2.65421	2.22222	3.47657	2.21916	1.41094	1.41723	1.92816	1.9584	1.47504	2.24512	2.43801	3.18167	2.44589	5.03474	2.04973	3.06513	5.90458	2.71039	1.09336	3.33968	2.44624	1.26594	1.02718	3.2911	3.45937	2.55467	1.62059	3.81519	3.98121	3.17168
NaN	0.499126	1.01562	0.570841	0.389514	2.41844	1.1212	0.674673	NaN	NaN	0.473687	0.696088	0.696137	0.646872	NaN	0.657938	0.521105	1.22969	0.538677	0.678472	0.895656	0.964599	1.0398	1.69162	0.485201	0.895977	1.1033	0.87943	1.51048	0.638855	1.31652	0.399664	0.444148	NaN	1.42922	2.5974	1.55715	1.9629	1.64764	2.09367	1.98157	NaN	3.37268	1.25696	0.459474	1.6065	1.76028	1.7685	0.905223	1.32006
NaN	NaN	NaN	0.285055	NaN	NaN	NaN	NaN	NaN	NaN	0.47856	NaN	NaN	NaN	NaN	0.354799	NaN	NaN	NaN	0.242571	NaN	NaN	0.433163	0.267358	NaN	NaN	NaN	0.373427	0.557072	NaN	NaN	0.768049	0.491087	0.310491	NaN	NaN	NaN	NaN	NaN	NaN	NaN	NaN	NaN	NaN	NaN	0.463435	0.503728	NaN	0.829669	0.778029
NaN	NaN	0.678748	0.485814	1.35851	1.70074	0.754831	NaN	NaN	NaN	1.15197	1.20976	1.38163	NaN	1.52704	NaN	1.49627	NaN	0.803471	NaN	NaN	1.84492	NaN	1.54433	0.695991	0.832362	1.45425	0.86259	1.22977	NaN	2.72235	2.72881	1.34488	2.43908	1.60143	NaN	1.30664	NaN	0.720357	NaN	2.78909	NaN	0.595344	NaN	NaN	1.89326	1.34479	2.05821	2.51124	3.94555
2.21548	1.59013	1.99442	1.51925	4.34499	1.29579	1.46374	0.925583	1.5569	NaN	1.81002	1.8008	2.17661	2.05935	1.88961	1.54226	1.88398	4.32826	1.7792	1.03536	NaN	1.62776	5.47465	1.34778	2.60396	0.91659	1.65931	1.23741	NaN	3.02288	1.92141	1.80274	3.43289	1.14277	2.43321	6.75904	4.53083	3.19275	2.11095	5.56669	3.68175	NaN	7.259	2.319	2.27583	3.82731	2.55096	6.50872	3.57628	2.16972
0.309186	0.37262	0.284422	NaN	0.315298	0.337359	0.197169	0.241034	0.43367	NaN	0.591471	0.80457	0.5576	0.49687	NaN	NaN	0.857192	NaN	0.359273	0.258378	0.474293	0.498355	0.651339	0.305708	0.331257	NaN	NaN	0.513716	0.278637	0.336564	NaN	0.689846	0.553557	0.676544	1.09971	0.231198	0.688563	0.90082	0.330458	0.620078	0.730194	NaN	1.87406	0.336485	0.746269	0.644205	1.03447	0.706464	0.509243	1.17044
0.235538	0.254835	0.267073	0.25468	0.267187	0.130039	0.298739	0.270234	0.375291	0.29769	0.155872	0.219829	0.342243	0.324886	0.200803	0.14278	0.259383	0.424322	0.18741	0.138571	0.277554	0.26678	0.4363	0.515305	0.373302	0.349211	0.274552	0.474473	0.0953925	0.162752	0.232954	0.341378	0.506611	0.54606	0.275081	0.409601	0.712657	0.503221	0.400256	0.545762	0.774054	1.03725	0.811557	0.289771	0.370206	0.567601	0.316155	0.297912	0.601468	0.546926
0.596552	0.483395	NaN	0.317028	0.452345	0.222995	0.611172	0.561136	0.557787	NaN	0.576302	NaN	0.72448	0.46277	0.861846	NaN	0.72015	NaN	0.410695	0.437637	NaN	0.686153	0.41834	0.597729	0.515358	NaN	NaN	1.01195	0.633352	NaN	0.745879	0.632391	NaN	NaN	NaN	1.06244	0.547345	0.889047	2.05668	NaN	NaN	NaN	0.856384	1.16058	1.12054	0.852515	0.800576	NaN	0.857045	1.21468
0.611845	0.462577	0.608791	0.401155	0.780153	0.4784	0.486452	0.713216	0.627865	0.586717	0.512847	0.500751	0.374742	0.464965	0.463306	0.703532	0.627313	0.488043	0.615915	0.503652	1.05718	0.733891	1.12766	0.74912	0.429111	0.534359	0.674127	0.930406	0.699056	0.491497	0.594424	0.697886	0.521703	0.895335	0.644371	0.951837	2.24891	0.564238	0.550297	1.39958	1.17241	0.924898	3.07182	0.803148	0.901632	0.815328	2.06258	1.43804	1.16478	0.727273
1.43984	2.50903	0.906947	0.969744	0.594142	0.640369	0.703185	2.28828	2.70512	0.657808	4.67355	1.64406	1.19517	2.5902	3.11721	0.94518	5.64844	1.57262	1.01516	0.835631	3.14584	2.46859	9.7924	2.64725	4.36529	1.44674	4.35275	3.29892	0.504974	0.934318	1.88264	6.39223	6.54493	6.91037	7.02741	1.88172	1.6302	3.98089	1.5874	2.59929	3.9398	3.87943	1.26638	4.68801	3.81272	3.89499	2.49426	2.70307	6.74901	10.9804
0.317844	0.188427	0.273433	0.236496	0.146113	0.10926	0.0445871	0.0344234	0.291129	0.692089	0.260268	0.839067	0.0677231	0.108298	0.130149	0.0909504	0.934492	0.166725	0.195714	0.0439252	0.16826	0.280363	0.827677	0.982222	NaN	0.151948	0.881445	0.515756	0.0895415	0.127397	0.436929	0.55991	0.526648	0.423227	0.321771	0.479295	0.55209	0.67769	0.114908	0.570678	0.707764	0.889442	0.0104205	0.577834	0.918358	0.819538	1.10542	0.742666	0.937295	0.477737
0.100223	0.555926	0.307882	0.0507949	0.0155017	0.108277	0.0424881	0.11919	0.119549	0.173638	0.410526	0.24426	0.348371	0.180031	0.0685824	0.0163375	0.166259	0.181924	0.130967	0.0385579	0.140133	0.251997	0.389241	0.285233	0.57468	0.136866	0.0766107	0.149651	0.0572508	0.0834725	0.28255	0.100559	0.343171	0.175694	0.938791	0.619348	0.795735	0.248478	0.482067	0.310308	0.200602	0.455353	0.207736	0.241016	0.378516	0.155824	0.111971	0.174073	0.180509	0.341239
0.780031	1.06771	0.622355	0.307664	0.158466	0.378429	1.56983	0.541829	0.962279	0.319734	0.532765	0.862738	0.76599	0.512059	0.725216	0.380894	0.639754	1.13379	0.741015	0.495098	0.551086	0.944822	1.64293	0.402398	1.13194	1.29948	1.17698	0.938086	0.304915	0.38552	0.283182	1.0024	0.71048	1.34034	1.29582	0.673355	1.30422	1.72414	0.456329	1.0942	0.803665	1.74408	1.60095	0.895015	2.31096	1.52985	1.51644	1.71095	1.66201	2.27309
0.683107	0.690846	1.09564	0.551177	0.74129	0.847817	0.912825	1.03467	0.939938	0.202963	0.819202	0.624844	0.338995	0.740028	0.382629	0.38909	0.748391	0.328256	0.586545	0.363425	0.693001	0.827883	1.57527	0.687285	1.35617	2.72405	0.894054	1.32896	0.197859	0.425007	0.576735	1.46184	1.66839	1.67558	1.06386	0.571951	3.21989	1.45066	1.28809	1.61223	2.24967	1.46638	0.610613	1.11916	1.05176	1.15874	0.643377	1.43744	2.00965	1.92597
NaN	NaN	NaN	NaN	NaN	NaN	NaN	4.2526	NaN	NaN	NaN	NaN	NaN	NaN	NaN	1.55282	NaN	NaN	2.44176	NaN	NaN	4.3122	NaN	2.80678	4.69175	4.11573	NaN	NaN	3.66394	NaN	NaN	NaN	NaN	7.21188	NaN	6.25117	NaN	NaN	NaN	NaN	NaN	NaN	7.05617	5.46269	4.39812	7.71129	NaN	NaN	NaN	NaN
23.3585	18.3288	12.735	4.36015	12.471	5.68796	11.6005	13.5119	14.1768	2.81897	10.1685	6.43874	0.305726	11.7323	1.88537	4.17519	10.9343	1.73112	8.83939	1.40986	11.5076	21.2013	14.1565	63.9672	11.1245	8.22504	19.0487	29.663	3.81752	6.48677	3.38066	8.78735	32.0564	17.3756	11.6722	14.7321	67.2585	28.255	8.79198	59.4566	45.3391	28.4754	2.42571	19.906	29.9025	15.6296	13.0722	24.9445	27.8901	15.507
1.21959	1.23323	1.39848	1.58083	1.30227	NaN	0.948767	1.78104	0.903506	NaN	1.53468	1.16206	0.622471	1.01311	1.50946	1.8511	2.25063	2.21646	1.60292	1.04186	NaN	1.21734	1.53015	2.65534	1.91729	1.36129	2.04065	NaN	2.23449	2.56568	1.61249	1.68325	1.82395	1.46404	1.49352	3.51333	3.44033	2.64795	2.53955	1.71465	1.96109	NaN	7.57978	4.28761	2.07615	3.06372	3.40067	4.43321	1.07127	2.72383
0.609607	0.427661	0.474518	0.170803	0.337564	0.312315	0.509035	0.446329	0.429037	0.338707	0.431779	0.255572	0.265421	0.224522	0.301768	0.779302	0.483372	0.341052	0.474158	0.324886	0.649646	0.548486	1.51169	0.695265	0.549602	0.377644	0.498554	1.14488	0.324517	0.257003	0.240656	0.288926	0.421976	0.630477	0.445653	1.03699	1.75988	0.780518	0.274899	1.02679	0.866101	0.901876	3.66126	0.43465	0.820546	1.00326	1.25299	1.33312	0.897666	0.585892
NaN	NaN	NaN	NaN	NaN	NaN	NaN	NaN	NaN	NaN	NaN	0.37372	0.373566	0.368446	NaN	NaN	0.420009	NaN	0.988142	NaN	0.128708	NaN	0.534616	1.01167	NaN	0.5194	0.404073	0.747719	0.883314	NaN	1.05594	NaN	0.447788	0.240177	1.05281	1.25502	2.0429	NaN	0.71048	0.816326	1.29129	NaN	0.538938	0.69935	1.79045	2.25154	0.610277	1.12523	0.728067	NaN
NaN	0.675721	1.434	NaN	1.34131	0.991473	1.24188	0.486192	1.37737	NaN	1.18593	1.02953	NaN	0.857854	1.28276	1.09173	0.771367	0.695024	0.789889	NaN	0.745712	1.17534	2.23184	1.09311	NaN	1.02978	0.917263	1.50994	0.474473	1.9996	0.63004	0.931619	1.48243	1.32843	1.01553	2.75096	3.85803	1.60914	1.07179	1.62232	4.09299	NaN	4.44207	0.947149	1.28763	1.43316	1.17044	1.66845	3.3129	NaN
3.29207	1.53556	2.98561	5.5991	3.05614	3.76932	2.32975	5.02968	2.54421	NaN	2.231	2.39252	2.06586	3.333	1.60997	2.04973	1.59383	2.85193	2.46057	0.867303	2.54959	1.88466	8.07037	5.18672	5.47465	3.64166	3.51976	7.3654	2.24351	2.52258	1.15864	5.01706	4.0391	3.36022	3.00418	5.90632	2.74386	3.2396	5.16476	3.2	7.10682	2.13506	9.11079	11.0721	5.4057	28.2909	7.74893	5.75705	9.59509	6.35324
5.82717	6.25743	4.38558	4.37771	2.85739	6.01685	5.27204	6.85589	8.51499	3.75502	6.0042	7.49738	3.24654	6.58155	3.35976	2.3788	5.76236	3.94135	3.78817	2.84827	3.46981	5.76302	5.45137	3.96652	16.8862	9.10249	5.7032	3.72426	2.85022	3.21203	2.03766	9.24044	12.7047	19.3229	12.2968	5.82004	12.2846	7.3551	5.1975	16.0911	9.25755	6.18009	4.004	12.0569	12.2463	8.16793	9.70591	11.3208	16.1595	10.9749
1.56223	NaN	1.08693	1.63058	1.97789	2.00236	NaN	1.03221	1.1077	NaN	1.37616	1.32531	NaN	1.0626	0.949938	1.09197	1.62009	1.9935	0.938615	1.80326	2.41109	1.87988	NaN	1.06373	NaN	1.20273	NaN	4.1561	1.77283	NaN	NaN	NaN	0.983865	1.51174	1.39774	NaN	NaN	1.93431	NaN	1.19916	2.32148	NaN	8.02697	NaN	2.83648	2.81611	6.13535	4.59432	3.16907	NaN
0.438962	0.410509	0.518162	0.508388	0.324781	0.503373	0.407382	0.703482	0.528849	0.360231	0.303905	0.334874	0.397867	0.466396	0.459284	0.360516	0.470522	0.604084	0.575573	0.269295	0.563285	0.523177	0.743052	0.543095	0.752729	0.367742	0.399824	0.807689	0.208312	0.525569	0.963762	0.499526	0.638244	0.670736	0.619886	0.77682	2.97539	0.428266	0.306937	0.817595	0.892459	0.64288	0.980296	0.884251	0.832155	0.517706	1.49988	1.60169	0.798467	0.79713
0.258051	0.482649	0.160852	0.138785	0.137646	0.159785	0.335255	0.208646	0.134867	0.114571	0.121265	0.103651	0.218857	0.223944	0.108658	0.10872	0.13582	0.124719	0.140074	0.119349	0.238175	0.188171	0.58309	0.231128	0.635728	0.197629	0.194757	0.359686	0.106207	0.146316	0.125926	0.221317	0.190661	0.170045	0.234329	0.372675	0.72982	0.464253	2.78125	0.401348	0.176072	0.609236	0.292791	0.284535	0.265555	0.409484	0.425749	0.268204	0.194765	0.176367
1.12197	2.7386	1.74204	0.229933	0.69377	11.4915	1.64312	0.819739	1.1782	1.82973	0.484168	1.13249	NaN	0.444563	0.762253	1.31977	0.169231	0.255578	1.49943	0.308318	0.623947	0.956846	27.5293	23.4516	1.41641	1.91289	9.45984	1.55041	0.764409	0.770119	1.82269	NaN	1.47604	NaN	0.343584	12.9845	1.89312	20.2179	11.6329	3.26669	4.16372	1.51559	21.8393	7.18907	2.23194	19.3592	3.06101	6.44538	4.83933	6.81756
0.959325	0.70082	0.658718	0.814531	1.51217	1.12361	0.929109	0.796178	1.6737	0.876808	1.12755	0.872372	0.850268	1.60617	1.23455	0.41927	1.21665	1.58828	0.760456	0.876424	1.18651	1.64693	3.09224	3.05343	1.97824	1.26886	2.89931	1.36362	1.04109	0.652103	0.639713	1.17026	1.83726	1.22414	1.35322	1.97414	2.08203	6.56168	2.96296	2.97469	3.97362	1.53655	4.0662	2.3843	3.83848	3.24275	3.27043	3.67148	3.66596	1.68557
0.42821	0.263082	1.36776	1.09555	0.362779	0.646998	0.597693	1.7466	0.661551	0.511274	0.328493	0.508492	0.649308	0.481556	0.543331	0.857633	0.25047	0.324602	0.867227	0.481672	0.173223	0.492465	3.76989	1.67768	0.552669	0.438212	0.50005	0.841609	0.532056	2.27355	3.01859	0.580923	1.11683	0.740576	0.584317	0.998502	3.41041	1.40193	0.526039	1.11691	2.89318	0.938086	2.08151	0.544218	1.98247	1.19483	1.17741	3.67999	0.781189	1.3842
1.58494	1.87793	3.02957	1.10687	1.30545	0.960707	1.49916	2.65161	2.05838	0.538967	2.07005	2.0143	0.942596	2.09604	1.15315	1.29119	3.0932	1.80404	1.76738	0.578972	1.21067	1.18023	39.1619	3.81592	3.08461	0.986972	1.72524	4.92975	1.46034	1.98602	0.966557	3.41239	3.51654	1.30892	3.85134	20.7766	3.96589	5.46329	4.36395	4.93389	4.67181	6.73401	3.44947	8.01282	10.2673	28.4374	5.02917	8.44024	3.01114	2.98757
1.89721	4.00144	2.16835	1.51087	1.96071	1.49125	2.14339	1.55176	1.71848	1.31294	2.62577	1.59144	1.37813	2.07267	2.58692	1.63428	1.91377	1.85171	1.6046	1.43156	1.62909	4.39715	6.71051	3.64073	1.56602	1.998	2.01723	4.26967	1.70103	2.74906	2.18164	2.53556	2.86123	1.88893	2.91384	3.39397	3.19519	6.38855	3.1501	3.58912	9.80008	1.94126	4.03779	3.71471	4.44207	11.2961	9.13743	6.52997	4.9771	3.74322
1.18573	0.578035	NaN	0.251762	0.566315	0.592628	0.532056	NaN	NaN	NaN	NaN	NaN	0.401622	0.577234	0.712809	0.484144	0.346861	0.537143	NaN	0.51435	0.51398	NaN	0.501605	0.381621	0.45296	0.715205	NaN	0.578972	NaN	0.809585	0.931272	NaN	0.767754	0.66072	0.409383	NaN	0.555155	4.42517	1.27522	NaN	NaN	NaN	1.00781	0.599161	NaN	0.637714	1.1953	NaN	NaN	0.622859
9.33358	9.75991	4.92029	4.41872	5.44929	4.1137	2.02593	NaN	9.07441	2.44015	7.42391	6.63086	7.98913	11.4583	3.9353	4.60957	3.82761	1.31053	10.7596	6.71547	7.61847	15.1683	18.2438	14.4509	3.89742	2.21961	5.77701	14.7195	3.44816	3.44471	3.88154	7.48895	30.7901	11.5682	6.72178	12.2594	44.9802	13.5483	9.67305	38.5981	21.0146	2.92732	3.40159	6.94203	15.7045	14.9336	5.65451	19.1593	16.6022	14.0657
0.481116	0.431518	1.26148	0.55537	0.634156	0.937559	0.788706	0.514642	0.815461	0.355872	0.795798	0.380185	1.10865	0.719839	0.458295	0.544484	0.46729	0.862218	0.425423	0.441579	0.639836	0.710833	1.38324	0.745156	0.803019	0.442556	0.382892	0.464684	0.42996	1.69156	1.18286	1.15981	1.29919	0.916338	1.59987	0.696137	1.35822	0.978186	0.29967	1.31641	2.04215	0.818934	2.319	1.47016	1.80229	1.03624	0.80782	1.71748	1.67297	1.54933
1.80695	2.68485	1.96263	0.655351	0.71582	0.589657	1.4315	0.876347	1.65442	1.02888	1.22914	1.13576	1.04377	1.11667	0.647501	0.900982	4.26021	0.485248	1.13418	0.495172	2.13643	1.41155	7.13267	5.92558	1.70445	1.73046	1.28693	2.04403	4.92732	0.506817	0.790077	1.1499	2.06037	1.45756	5.23862	2.58138	5.51116	7.11946	9.19287	3.25935	4.12065	3.53232	6.01106	3.64724	4.8223	9.4679	1.48012	2.20298	2.32466	3.16265
5.63634	6.64364	NaN	2.64166	3.98184	2.26788	3.17874	2.16647	4.77418	1.17567	2.32391	7.20617	0.207745	7.36052	1.1514	NaN	1.00295	NaN	4.56955	NaN	8.80514	2.58471	11.0346	10.4478	1.62758	6.88421	6.57117	6.83293	3.13126	3.84275	6.26881	7.74833	9.14746	9.62093	7.34538	3.90016	13.4061	12.1284	NaN	13.2834	7.62079	7.03433	NaN	11.3368	11.552	8.53097	6.18965	8.80049	12.0112	5.36049
0.444919	NaN	NaN	0.35629	NaN	0.426366	NaN	0.549511	NaN	NaN	0.396511	NaN	NaN	0.3465	NaN	NaN	NaN	NaN	NaN	NaN	NaN	NaN	NaN	0.291749	NaN	NaN	NaN	NaN	NaN	0.863409	0.897424	0.513637	NaN	NaN	0.489884	0.51198	NaN	NaN	NaN	NaN	0.896861	NaN	1.19349	NaN	NaN	0.707714	1.31898	1.04419	NaN	NaN
NaN	0.898715	NaN	NaN	2.21509	1.28066	0.543006	0.95511	1.9311	NaN	2.46093	NaN	0.693289	2.0086	1.01581	1.57465	2.08052	NaN	1.26887	1.22357	1.1329	1.42544	1.79701	1.61933	NaN	1.20301	1.32287	2.81905	1.42294	0.999301	2.46518	2.83318	1.67504	1.47304	1.09684	2.53062	2.22198	2.02832	NaN	NaN	2.32872	NaN	4.4615	3.16967	3.49797	2.86361	9.06454	7.9233	3.96621	1.57876
1.69188	NaN	0.761963	1.11774	1.55584	NaN	0.803407	0.41658	1.81838	NaN	0.604303	0.677369	0.283712	NaN	0.850268	0.233836	1.35069	NaN	1.27743	0.421621	1.635	0.671953	1.03541	1.55814	0.513664	1.74231	4.20045	2.52551	0.405039	0.485107	NaN	3.08833	3.93716	7.27431	1.32644	1.85894	1.85763	NaN	3.10974	1.13886	1.56553	NaN	1.8962	2.9209	3.32336	4.03959	3.7262	1.54564	1.23125	2.88184
3.80026	1.98247	2.85927	1.18018	1.93132	1.97667	3.65177	2.80348	1.81653	0.310984	1.00724	1.3568	1.17292	1.86731	3.31576	1.27515	1.63822	1.58733	1.63655	1.14611	3.56037	3.28915	2.51642	1.55364	2.32364	1.95932	9.4679	2.35638	0.898069	1.47252	1.92626	7.59821	2.48942	3.58089	2.3535	9.11079	4.25967	5.37953	1.94062	3.31246	6.4587	2.18007	3.92449	3.6626	6.33995	3.5699	8.66701	10.8992	5.84761	9.56206
1.64285	1.0416	0.934841	2.12161	2.00196	2.39012	NaN	0.601757	2.00473	NaN	1.65467	2.40489	1.3842	2.67802	1.74926	1.07459	2.87853	1.1399	1.45345	5.00626	3.31763	3.26381	5.25845	2.1889	1.15209	1.33296	1.2752	3.37895	1.7915	NaN	1.99641	3.22435	2.63616	5.46359	2.24351	19.7742	6.04084	3.03564	2.63678	2.71393	1.93521	1.39618	6.89132	5.16529	5.05587	5.13901	2.58045	7.58495	4.39425	3.15139
NaN	1.15958	NaN	NaN	1.30777	0.575175	1.64533	0.891663	1.27649	2.22931	0.854701	1.77038	1.70576	0.753069	1.62122	1.50279	1.26178	NaN	1.59487	1.60218	0.650195	0.612108	0.484496	NaN	NaN	0.785855	0.641355	0.847027	2.10979	0.62282	1.07987	NaN	1.27457	0.592663	0.365163	0.627904	0.27422	NaN	33.8181	0.621041	0.858885	0.700231	NaN	0.542446	0.608643	0.708767	NaN	0.947778	0.347138	0.967305
0.897827	1.3155	0.391298	0.204683	0.304507	0.303463	0.852806	1.49434	0.226752	NaN	0.507795	0.272213	0.156838	NaN	0.943218	0.35392	NaN	0.225535	0.569671	0.103519	0.457959	0.50005	2.31144	0.25748	0.687853	0.396511	0.885269	0.376478	0.172067	NaN	3.62726	1.00147	0.636537	0.527565	0.376194	1.3838	0.426276	0.698519	4.60257	0.696524	0.617208	NaN	1.66667	1.17639	2.42701	1.33835	1.48245	0.76864	1.15108	0.567537
9.42596	3.23426	51.023	2.57938	9.47598	NaN	12.1002	8.5419	13.0577	NaN	12.3905	13.4678	10.0269	33.9374	3.60153	2.50583	3.18461	19.311	19.661	1.39115	3.34415	14.4036	28.2869	34.9687	NaN	5.2356	1.62697	8.1493	25.1212	43.3576	3.51025	29.3962	39.8724	36.7417	69.0131	40.7681	39.0793	12.7191	22.7438	44.5395	45.7059	9.54199	17.7607	28.3551	19.036	15.8073	10.8036	31.7219	35.8089	29.1809
NaN	NaN	NaN	NaN	1.55255	NaN	NaN	NaN	1.08578	NaN	1.70337	NaN	NaN	1.35037	NaN	NaN	NaN	NaN	NaN	0.923873	NaN	2.18594	NaN	NaN	1.13687	0.991965	NaN	1.62912	0.959877	8.81756	NaN	NaN	NaN	1.66939	1.31439	NaN	NaN	NaN	NaN	NaN	1.82715	NaN	2.80954	NaN	NaN	NaN	2.11363	2.2415	NaN	NaN
4.12831	NaN	NaN	7.85422	5.68634	NaN	NaN	NaN	NaN	NaN	NaN	6.16333	NaN	NaN	NaN	5.32964	5.10412	NaN	NaN	NaN	NaN	NaN	NaN	NaN	NaN	NaN	NaN	9.94135	NaN	NaN	NaN	18.8133	NaN	NaN	NaN	NaN	NaN	NaN	NaN	NaN	NaN	NaN	NaN	NaN	NaN	NaN	10.4112	NaN	16.1922	10.5181
0.157173	0.121361	0.0974469	0.0110589	0.0578369	0.0149929	0.144953	0.745379	0.12808	1.35704	0.0621543	0.10549	0.00327375	0.0499775	0.0180672	0.145958	0.4723	0.0456621	0.0903832	0.182004	0.662998	1.92341	0.672948	3.70837	0.345125	0.618391	3.81446	0.396951	0.318939	0.108462	0.788644	0.0238175	0.245038	0.142205	0.20491	2.19602	1.07908	3.23384	1.75226	1.8309	2.15796	0.434726	6.744	0.976372	0.452817	2.3382	0.958865	1.07961	0.616827	0.455768
2.82175	NaN	NaN	NaN	1.70882	3.09473	1.95614	NaN	NaN	NaN	NaN	NaN	NaN	1.34669	0.27274	1.42931	NaN	NaN	1.86279	NaN	1.9734	1.99816	4.41365	2.16572	NaN	NaN	NaN	6.28615	NaN	NaN	5.33931	2.32997	2.50457	1.67101	3.43808	4.03405	NaN	11.0418	NaN	NaN	2.68694	0.962557	NaN	6.01178	9.42863	6.78472	NaN	13.1752	11.2213	3.81403
25.8592	NaN	14.5132	44.1852	NaN	NaN	NaN	NaN	10.7442	8.47529	22.8274	12.548	6.54407	134.255	NaN	76.1035	NaN	57.2312	NaN	8.79662	NaN	NaN	14.4699	107.419	60.4631	NaN	9.68992	231.476	NaN	NaN	25.5056	57.5242	109.957	12.5603	53.9607	42.2744	250.457	76.7165	NaN	173.115	NaN	379.061	110.039	59.7943	132.749	NaN	19.9645	339.294	70.7965	84.9618
NaN	NaN	1.15678	NaN	3.64272	NaN	NaN	NaN	4.25804	NaN	3.84867	4.62449	NaN	NaN	NaN	NaN	3.95617	NaN	2.94681	NaN	5.20237	4.6277	6.07275	1.00606	2.06394	5.7241	2.71488	5.04974	NaN	NaN	NaN	6.48172	NaN	6.13271	9.73236	NaN	7.4129	6.67067	NaN	22.9912	9.82125	4.64166	3.72093	10.2547	11.2943	9.24898	5.78402	14.9289	21.0464	6.5304
7.53807	NaN	NaN	NaN	NaN	NaN	NaN	NaN	NaN	NaN	3.74532	NaN	NaN	NaN	4.19024	NaN	6.57246	NaN	2.44798	NaN	4.53165	2.57798	3.95413	NaN	NaN	3.67836	1.93626	6.58284	NaN	NaN	NaN	16.3789	NaN	20.4947	NaN	NaN	NaN	NaN	NaN	9.96016	11.611	NaN	NaN	7.4151	7.85114	8.11952	4.51732	8.3682	14.0317	12.0627
NaN	0.422333	NaN	NaN	0.0247464	NaN	NaN	NaN	0.431388	NaN	0.384541	0.665868	0.00806712	0.0517947	0.0942241	0.0168674	NaN	0.118444	NaN	0.128144	0.827472	0.0195787	0.0978761	0.0116167	NaN	2.03169	NaN	0.125897	0.27767	NaN	0.575573	0.765931	1.62227	0.106884	0.0308157	NaN	NaN	3.57897	NaN	NaN	1.6342	NaN	0.850557	0.840266	NaN	0.231353	0.713878	0.44236	0.600348	0.10643
NaN	NaN	NaN	0.529857	1.72218	0.922509	NaN	NaN	1.44109	NaN	0.894935	0.987849	NaN	NaN	NaN	NaN	1.20716	NaN	NaN	NaN	1.57913	1.13365	1.28806	1.87392	1.20107	0.847027	1.6164	2.51023	1.56683	NaN	NaN	0.968148	NaN	1.01777	NaN	NaN	1.25717	NaN	NaN	1.73154	2.40784	30.9972	3.34079	1.96379	1.94503	1.838	2.54816	2.00703	2.51585	2.10837
NaN	1.18995	2.98027	1.10817	0.968711	1.48076	1.06678	2.18838	1.37438	NaN	NaN	1.17901	NaN	1.88661	NaN	0.498952	0.494071	NaN	NaN	1.10116	NaN	NaN	NaN	NaN	4.01171	NaN	NaN	NaN	NaN	NaN	NaN	NaN	NaN	NaN	2.50576	3.13647	1.58275	8.40266	NaN	NaN	NaN	2.48626	3.02279	4.35882	7.59763	NaN	NaN	10.5311	NaN	NaN
0.903179	NaN	NaN	NaN	NaN	1.33388	NaN	NaN	NaN	NaN	NaN	NaN	NaN	NaN	NaN	NaN	NaN	NaN	0.500501	NaN	NaN	NaN	NaN	NaN	NaN	0.106879	0.841468	NaN	NaN	NaN	NaN	1.41541	1.04638	NaN	NaN	3.83142	NaN	NaN	NaN	NaN	1.21168	NaN	NaN	NaN	NaN	1.87066	NaN	4.20681	1.62885	0.931185
0.0620771	0.137595	0.162848	0.425315	0.206915	0.10994	0.14268	0.441521	0.313568	0.0901713	0.0886132	0.196313	0.193386	0.180444	0.203318	0.262034	0.128823	0.326392	0.221043	0.0210455	0.244338	0.244906	0.0644621	0.61908	0.797894	0.468823	0.924214	0.86408	3.06946	0.170372	0.111164	0.113524	0.420575	0.0794155	0.169877	1.47769	0.657246	10.7965	3.68365	0.409383	0.898796	0.658979	1.24105	1.21308	1.4473	1.68481	0.270153	1.38064	1.38733	0.178968
NaN	NaN	0.336304	NaN	NaN	NaN	1.05284	0.562145	NaN	NaN	0.706514	0.819538	NaN	0.919371	NaN	NaN	0.767754	NaN	NaN	0.263144	NaN	1.18691	1.38244	NaN	0.945448	0.702741	NaN	0.514642	0.953925	NaN	NaN	NaN	1.27637	NaN	NaN	2.57142	1.50616	NaN	1.09192	3.3644	1.48419	NaN	3.22331	NaN	1.22131	5.18484	0.524411	2.91962	2.28399	NaN
NaN	NaN	0.499376	0.462813	0.587993	NaN	NaN	NaN	NaN	NaN	0.533106	NaN	NaN	0.483068	NaN	NaN	NaN	NaN	NaN	NaN	0.880282	NaN	NaN	NaN	NaN	NaN	NaN	NaN	NaN	NaN	NaN	NaN	0.40282	NaN	NaN	NaN	0.412371	NaN	NaN	NaN	NaN	NaN	NaN	NaN	NaN	0.461723	NaN	NaN	NaN	NaN
NaN	NaN	NaN	NaN	NaN	NaN	NaN	NaN	4.60914	NaN	NaN	NaN	NaN	NaN	NaN	NaN	NaN	8.70549	NaN	NaN	NaN	NaN	NaN	NaN	7.83576	NaN	NaN	NaN	NaN	NaN	NaN	10.7602	NaN	12.8048	9.39761	NaN	NaN	NaN	NaN	NaN	NaN	NaN	NaN	15.7408	12.4646	NaN	NaN	NaN	18.0613	21.6483
NaN	NaN	NaN	NaN	NaN	NaN	NaN	NaN	NaN	NaN	NaN	NaN	NaN	NaN	1.6655	NaN	1.43025	NaN	NaN	NaN	NaN	0.825151	NaN	NaN	NaN	NaN	NaN	1.32142	1.76582	NaN	NaN	NaN	NaN	NaN	NaN	NaN	0.503373	NaN	NaN	NaN	NaN	NaN	NaN	NaN	1.01084	1.09736	NaN	0.729714	0.570093	NaN
NaN	NaN	NaN	0.797575	NaN	NaN	NaN	NaN	NaN	NaN	3.29533	4.54133	NaN	NaN	2.66731	3.27697	NaN	NaN	NaN	2.93307	0.735673	NaN	NaN	NaN	NaN	NaN	NaN	NaN	1.71005	NaN	NaN	NaN	NaN	NaN	NaN	0.720721	0.524439	NaN	NaN	NaN	NaN	NaN	NaN	NaN	NaN	NaN	NaN	NaN	NaN	NaN
NaN	NaN	NaN	NaN	NaN	1.13377	NaN	1.05782	NaN	NaN	NaN	NaN	1.46216	1.16788	NaN	2.39969	NaN	NaN	NaN	1.40367	NaN	NaN	NaN	NaN	NaN	NaN	0.620771	1.12628	NaN	NaN	NaN	NaN	0.572213	NaN	NaN	NaN	0.556638	NaN	NaN	NaN	NaN	NaN	NaN	NaN	NaN	NaN	NaN	0.750019	NaN	NaN
7.07664	NaN	13.0242	NaN	NaN	NaN	NaN	21.9549	NaN	NaN	NaN	NaN	NaN	6.43294	NaN	NaN	NaN	NaN	NaN	NaN	NaN	8.87469	NaN	NaN	NaN	NaN	14.2678	NaN	NaN	NaN	5.09502	NaN	NaN	NaN	3.79982	NaN	NaN	NaN	NaN	NaN	NaN	6.1565	NaN	NaN	5.48697	NaN	NaN	NaN	NaN	NaN
NaN	20.4612	NaN	NaN	NaN	4.56142	2.0613	12.1953	NaN	NaN	NaN	NaN	NaN	NaN	16.2138	NaN	NaN	20.4918	NaN	6.9633	85.9845	9.09256	NaN	NaN	NaN	NaN	NaN	NaN	NaN	7.13725	0.345734	NaN	6.83293	NaN	NaN	NaN	NaN	NaN	NaN	NaN	NaN	NaN	NaN	NaN	NaN	NaN	NaN	NaN	NaN	NaN
NaN	NaN	NaN	3.14426	NaN	NaN	1.42051	NaN	NaN	NaN	1.50652	1.53659	1.47765	NaN	NaN	2.6992	2.06787	NaN	1.50035	NaN	NaN	NaN	NaN	NaN	NaN	NaN	NaN	NaN	NaN	2.54084	NaN	NaN	NaN	NaN	NaN	0.505485	NaN	NaN	0.766401	NaN	NaN	NaN	NaN	0.997606	NaN	1.12313	NaN	NaN	NaN	1.47693
NaN	NaN	NaN	NaN	NaN	NaN	NaN	NaN	NaN	NaN	0.725111	0.16539	0.728438	NaN	NaN	NaN	0.166359	NaN	0.099552	NaN	NaN	NaN	NaN	0.142473	NaN	NaN	0.0902201	0.230097	NaN	NaN	0.164867	0.0889759	NaN	0.132811	NaN	NaN	NaN	NaN	NaN	NaN	NaN	NaN	NaN	NaN	0.0525762	0.0761499	0.0501681	0.121371	NaN	NaN
NaN	NaN	NaN	NaN	NaN	NaN	NaN	NaN	NaN	NaN	0.705418	NaN	0.935629	0.984737	NaN	NaN	NaN	NaN	NaN	NaN	NaN	NaN	NaN	0.863632	1.01111	1.29296	NaN	NaN	NaN	NaN	NaN	NaN	5.53067	NaN	NaN	NaN	15.5386	NaN	1.25946	19.2652	5.37143	NaN	0.917179	1.00271	NaN	3.41518	NaN	5.31802	NaN	NaN
NaN	NaN	12.591	NaN	NaN	8.97424	5.61514	8.34098	NaN	NaN	NaN	NaN	5.19696	NaN	NaN	NaN	NaN	NaN	NaN	NaN	NaN	NaN	NaN	NaN	11.2212	NaN	NaN	NaN	2.01926	2.49881	NaN	0.252226	1.44881	NaN	NaN	7.64059	NaN	NaN	NaN	5.13426	NaN	NaN	3.273	NaN	4.60957	NaN	NaN	NaN	NaN	NaN
NaN	NaN	NaN	NaN	5.36423	NaN	NaN	NaN	NaN	NaN	NaN	NaN	NaN	NaN	NaN	NaN	6.07866	1.79553	1.89786	NaN	NaN	2.17387	NaN	NaN	NaN	NaN	NaN	2.7648	1.30721	NaN	NaN	NaN	7.66166	12.7735	2.64222	NaN	NaN	NaN	NaN	NaN	8.85975	NaN	NaN	NaN	NaN	7.48223	5.87786	NaN	NaN	2.91409
NaN	9.59601	19.1784	NaN	NaN	37.5827	NaN	NaN	24.3061	32.911	43.3107	NaN	NaN	25.5663	92.9109	NaN	NaN	19.8705	21.0141	NaN	NaN	43.2489	NaN	NaN	NaN	NaN	NaN	NaN	NaN	20.5673	19.064	19.5614	7.20461	NaN	NaN	NaN	NaN	NaN	NaN	NaN	NaN	NaN	NaN	NaN	NaN	NaN	NaN	NaN	NaN	NaN
NaN	NaN	NaN	NaN	NaN	NaN	NaN	NaN	NaN	NaN	NaN	NaN	0.559503	NaN	NaN	0.575672	0.703779	NaN	0.564111	0.415887	0.755687	NaN	NaN	NaN	NaN	NaN	NaN	NaN	0.383612	0.272859	NaN	NaN	NaN	NaN	NaN	NaN	0.374644	0.934667	NaN	NaN	0.363782	NaN	0.181271	0.262598	NaN	0.414783	NaN	0.492805	NaN	NaN
NaN	1.24176	5.52334	NaN	NaN	NaN	2.0963	NaN	NaN	23.8669	NaN	NaN	NaN	1.05965	NaN	NaN	0.361677	NaN	NaN	1.87252	NaN	NaN	NaN	NaN	NaN	NaN	NaN	1.65571	NaN	0.279791	NaN	NaN	NaN	0.510621	NaN	NaN	1.37251	NaN	1.05889	NaN	0.553894	NaN	NaN	NaN	1.07697	0.782534	NaN	0.700869	NaN	NaN
NaN	NaN	NaN	NaN	NaN	NaN	NaN	NaN	NaN	NaN	NaN	1.46936	1.14717	NaN	1.20417	1.53189	1.31591	0.765638	2.38016	1.1401	NaN	NaN	NaN	NaN	NaN	1.13465	NaN	0.886446	1.8547	NaN	NaN	NaN	NaN	NaN	1.07945	NaN	NaN	NaN	NaN	NaN	NaN	NaN	NaN	NaN	NaN	NaN	0.970874	NaN	1.02788	0.730194
NaN	NaN	NaN	NaN	NaN	NaN	NaN	1.33039	NaN	NaN	NaN	NaN	1.41721	NaN	4.23962	0.210855	2.6481	NaN	1.61439	NaN	NaN	NaN	NaN	NaN	NaN	3.61847	NaN	1.41411	NaN	NaN	NaN	NaN	NaN	NaN	NaN	2.51534	NaN	NaN	NaN	NaN	NaN	NaN	NaN	1.82652	5.44544	3.86085	3.01359	4.51264	NaN	NaN
NaN	NaN	NaN	1.48991	1.54131	NaN	NaN	NaN	NaN	NaN	0.984931	NaN	NaN	NaN	NaN	3.06607	1.88051	1.30581	NaN	1.79795	2.07434	1.4721	NaN	NaN	NaN	NaN	1.07109	NaN	1.82153	1.81009	NaN	NaN	NaN	NaN	NaN	NaN	NaN	NaN	NaN	NaN	NaN	NaN	NaN	NaN	1.2013	NaN	NaN	0.916254	NaN	0.727802
NaN	NaN	NaN	NaN	0.984349	NaN	NaN	NaN	NaN	NaN	NaN	0.769764	NaN	1.8005	NaN	2.02147	NaN	0.331708	NaN	1.64133	NaN	NaN	NaN	NaN	NaN	2.40871	0.97144	NaN	1.30907	NaN	NaN	NaN	NaN	0.596125	0.699839	1.0877	NaN	NaN	0.903996	NaN	NaN	NaN	0.551937	NaN	NaN	NaN	0.767578	0.845237	NaN	NaN
NaN	10.9272	29.0968	34.2759	NaN	9.14997	NaN	17.4672	8.54555	NaN	NaN	12.2362	31.1197	NaN	22.2732	13.9626	NaN	NaN	NaN	9.05715	NaN	NaN	NaN	NaN	NaN	11.2652	NaN	NaN	NaN	4.62022	16.8461	NaN	6.33473	NaN	NaN	NaN	NaN	NaN	NaN	NaN	NaN	NaN	NaN	NaN	NaN	3.76534	1.68098	NaN	NaN	NaN
NaN	NaN	6.02664	NaN	NaN	5.48246	NaN	NaN	NaN	NaN	NaN	4.58547	NaN	5.56638	NaN	NaN	NaN	NaN	NaN	NaN	NaN	15.3412	NaN	NaN	2.42354	13.2459	NaN	9.10996	NaN	NaN	NaN	NaN	NaN	NaN	NaN	NaN	119.035	19.0136	NaN	4.89908	NaN	142.672	NaN	22.2188	25.0916	NaN	NaN	NaN	20.3571	NaN
95.511	61.0762	42.6348	NaN	NaN	NaN	2.01377	162.912	75.7633	NaN	NaN	NaN	NaN	NaN	NaN	NaN	NaN	NaN	1.27007	43.3369	NaN	16.6409	7.3828	NaN	NaN	40.0577	NaN	NaN	14.9891	NaN	NaN	NaN	NaN	NaN	NaN	2.74846	0.258238	4.32526	14.7438	NaN	1.96607	NaN	NaN	NaN	NaN	3.77572	NaN	NaN	NaN	NaN
NaN	0.75375	5.70613	NaN	NaN	1.4541	NaN	2.05618	1.09811	NaN	NaN	NaN	14.0558	15.8965	NaN	NaN	NaN	NaN	NaN	NaN	NaN	NaN	NaN	39.2927	4.67137	NaN	NaN	NaN	NaN	NaN	NaN	NaN	14.429	NaN	20.8021	NaN	19.2738	NaN	3.88591	NaN	19.6148	187.322	NaN	52.0562	21.0757	NaN	NaN	NaN	15.1117	NaN
NaN	1.90723	NaN	NaN	NaN	NaN	NaN	NaN	3.75883	NaN	NaN	4.00673	NaN	NaN	NaN	NaN	NaN	NaN	NaN	NaN	2.34968	NaN	NaN	3.55455	NaN	1.66728	NaN	3.59583	NaN	2.11627	NaN	NaN	3.75756	NaN	4.72701	NaN	11.2331	NaN	6.17932	5.88305	NaN	NaN	NaN	2.55011	11.7376	5.00801	NaN	10.9163	NaN	NaN
NaN	NaN	NaN	NaN	0.426185	NaN	NaN	NaN	NaN	NaN	0.45685	0.546	NaN	NaN	NaN	0.570288	0.653552	NaN	1.68731	0.571429	0.535074	NaN	NaN	0.466331	NaN	NaN	NaN	NaN	0.544425	NaN	0.432957	NaN	0.350631	0.390671	NaN	0.360334	NaN	NaN	NaN	NaN	0.674491	NaN	0.365657	NaN	NaN	0.478538	0.453001	NaN	NaN	NaN
NaN	NaN	0.922765	NaN	NaN	NaN	1.33733	0.813207	NaN	NaN	NaN	NaN	NaN	NaN	NaN	NaN	NaN	NaN	NaN	NaN	NaN	0.885112	3.35537	NaN	NaN	4.09383	4.75398	1.38043	NaN	NaN	NaN	NaN	NaN	0.904323	NaN	10.0915	0.9802	NaN	5.55093	NaN	3.62884	NaN	2.42559	NaN	NaN	7.71784	5.31773	6.38692	NaN	NaN
NaN	2.97009	NaN	NaN	NaN	NaN	NaN	1.19006	NaN	NaN	6.26449	NaN	1.9771	2.02943	NaN	NaN	1.78836	1.63257	5.39316	NaN	0.806517	2.05999	NaN	2.83182	2.38385	NaN	NaN	NaN	2.70248	NaN	NaN	NaN	NaN	NaN	NaN	NaN	NaN	NaN	NaN	NaN	4.54277	NaN	11.768	2.26424	NaN	NaN	3.52597	NaN	NaN	3.62385
NaN	0.203459	0.313342	NaN	0.156355	0.654236	0.217023	NaN	NaN	NaN	NaN	NaN	0.620424	0.320267	NaN	0.293539	NaN	0.135291	0.172888	NaN	0.360659	0.151775	0.170847	NaN	1.24272	NaN	NaN	NaN	NaN	NaN	NaN	NaN	NaN	NaN	NaN	NaN	NaN	NaN	0.129747	0.175522	NaN	NaN	0.121545	NaN	NaN	0.137412	NaN	NaN	NaN	0.170048
NaN	0.578302	NaN	NaN	0.623947	0.877963	0.276419	0.646914	NaN	NaN	NaN	NaN	0.527816	NaN	NaN	1.29485	NaN	NaN	0.273598	0.342372	NaN	NaN	0.797575	1.45163	NaN	0.313381	NaN	NaN	0.916842	NaN	NaN	NaN	1.48998	NaN	NaN	1.06181	NaN	NaN	NaN	NaN	NaN	NaN	2.06437	NaN	NaN	NaN	1.33701	1.12129	NaN	NaN
NaN	NaN	NaN	0.933184	NaN	1.15598	NaN	NaN	NaN	NaN	NaN	2.3525	NaN	1.53097	NaN	1.8557	2.76457	NaN	NaN	NaN	NaN	NaN	NaN	NaN	1.06517	1.30789	1.60981	2.97442	1.00765	NaN	NaN	2.2118	NaN	3.35492	NaN	NaN	NaN	NaN	NaN	NaN	NaN	NaN	NaN	NaN	1.73253	3.22061	1.84775	2.56397	2.81952	NaN
NaN	NaN	NaN	NaN	NaN	NaN	NaN	NaN	NaN	NaN	NaN	1.7734	NaN	1.97761	1.53789	NaN	0.899523	0.525348	0.864977	NaN	NaN	1.66406	2.42601	NaN	NaN	1.89843	NaN	0.764351	NaN	1.7225	NaN	0.727326	2.06122	NaN	2.04078	1.9727	NaN	NaN	NaN	NaN	NaN	NaN	1.96506	2.56595	NaN	2.82422	2.11122	NaN	NaN	NaN
1.22308	NaN	NaN	NaN	1.10688	2.52717	1.60777	2.60899	0.968523	NaN	NaN	NaN	NaN	NaN	NaN	1.18079	1.01969	NaN	NaN	NaN	NaN	NaN	NaN	0.495712	2.04123	NaN	NaN	NaN	NaN	NaN	NaN	NaN	0.886446	NaN	NaN	2.06028	NaN	NaN	NaN	NaN	1.92419	NaN	2.3456	1.31251	NaN	7.91515	3.09463	4.14062	NaN	NaN
NaN	NaN	0.639713	2.21862	1.56632	2.37999	NaN	NaN	NaN	NaN	2.10628	NaN	NaN	2.08	NaN	1.49338	NaN	NaN	0.940557	1.45696	NaN	1.43837	NaN	NaN	NaN	0.949668	2.15304	NaN	2.4466	NaN	NaN	NaN	NaN	1.42426	2.00136	NaN	NaN	NaN	NaN	0.929973	NaN	NaN	NaN	NaN	NaN	NaN	0.945001	0.823791	1.15931	NaN
NaN	NaN	NaN	NaN	1.34061	NaN	1.17129	NaN	NaN	NaN	NaN	NaN	0.910913	NaN	1.29618	1.13652	1.24747	NaN	NaN	NaN	NaN	NaN	0.458316	NaN	1.01846	NaN	0.922254	NaN	1.2394	NaN	0.611172	NaN	NaN	NaN	NaN	0.343489	0.476349	NaN	NaN	NaN	NaN	0.48033	1.49557	NaN	0.667156	0.523533	NaN	0.586304	0.670916	NaN
NaN	NaN	NaN	0.746102	3.71996	NaN	NaN	0.360049	NaN	NaN	NaN	NaN	0.357641	NaN	NaN	1.67647	NaN	NaN	0.433501	0.275611	0.769764	0.874814	NaN	NaN	NaN	0.548998	0.563761	NaN	NaN	NaN	1.98728	NaN	NaN	0.798977	NaN	1.59852	NaN	NaN	NaN	NaN	0.929109	NaN	2.8582	6.36051	0.647752	0.830358	0.978569	NaN	NaN	0.684978
20.1037	NaN	NaN	6.09682	1.88402	8.34516	NaN	NaN	NaN	NaN	NaN	4.20805	4.54545	13.4486	NaN	1.70169	NaN	NaN	4.49782	NaN	NaN	5.25431	NaN	NaN	15.7614	NaN	7.2569	5.95273	NaN	NaN	2.91647	NaN	NaN	0.228686	NaN	NaN	NaN	NaN	NaN	NaN	14.5285	NaN	1.21772	NaN	NaN	NaN	0.927558	1.0701	NaN	4.58842
NaN	NaN	NaN	NaN	1.83096	NaN	NaN	NaN	NaN	NaN	NaN	1.14331	1.03481	1.26513	1.45637	0.824878	1.396	NaN	1.65648	1.09349	NaN	1.07305	NaN	NaN	NaN	NaN	NaN	1.07431	1.95714	NaN	NaN	0.646412	NaN	NaN	0.81586	1.27269	NaN	NaN	NaN	NaN	NaN	NaN	1.76212	0.924471	NaN	NaN	1.08716	0.924214	0.881445	NaN
1.20006	NaN	NaN	NaN	0.719528	0.979336	NaN	NaN	NaN	NaN	1.15306	1.12288	1.05978	NaN	NaN	1.20398	1.08491	0.746826	NaN	0.346668	1.21923	0.958038	NaN	NaN	0.458674	1.24462	1.32959	0.966464	NaN	NaN	NaN	NaN	NaN	NaN	NaN	NaN	NaN	NaN	NaN	NaN	1.01695	NaN	NaN	1.12619	1.23084	1.30869	1.87357	1.33667	NaN	NaN
NaN	NaN	NaN	NaN	6.92473	NaN	NaN	NaN	NaN	NaN	7.98085	8.65426	NaN	NaN	NaN	NaN	7.79849	29.4265	6.90894	NaN	3.84482	NaN	9.07853	NaN	NaN	17.5892	NaN	14.871	NaN	NaN	NaN	NaN	26.9745	17.6159	12.3408	NaN	NaN	NaN	NaN	23.423	12.9688	53.1067	8.47745	NaN	15.9218	15.2402	NaN	4.54215	45.3453	20.222
NaN	2.09613	1.79199	NaN	NaN	NaN	4.80261	NaN	NaN	NaN	3.39443	NaN	1.50249	3.38089	NaN	NaN	2.86394	NaN	NaN	NaN	4.16962	NaN	2.78002	4.05894	2.46324	NaN	NaN	3.79752	NaN	3.79233	NaN	NaN	3.20893	3.39098	2.05681	NaN	NaN	NaN	NaN	6.00889	6.75174	NaN	NaN	12.0796	5.73724	7.62893	7.06564	4.05647	NaN	NaN
0.95429	NaN	NaN	1.43055	1.30659	NaN	NaN	NaN	NaN	NaN	1.13358	1.07368	NaN	NaN	NaN	1.81429	1.02028	NaN	NaN	NaN	1.16671	NaN	3.45853	NaN	NaN	NaN	1.24321	1.27598	2.33678	NaN	NaN	NaN	1.38057	1.13438	1.50609	5.44366	NaN	NaN	NaN	NaN	1.73738	NaN	0.88739	2.42172	NaN	2.90884	4.49944	2.98009	2.84811	NaN
NaN	NaN	NaN	NaN	NaN	4.27533	1.22061	1.90125	1.16922	NaN	0.928074	NaN	NaN	NaN	2.45598	NaN	NaN	NaN	NaN	NaN	NaN	NaN	2.22931	NaN	0.512899	NaN	1.75251	2.36496	3.52373	2.50866	NaN	NaN	1.41285	1.07297	1.96781	NaN	NaN	3.57462	2.97327	2.67537	NaN	NaN	5.23752	3.25235	2.59862	2.86829	NaN	3.25595	NaN	4.27643
NaN	2.44129	NaN	NaN	1.0252	6.4433	12.366	16.5003	0.427204	126.475	2.53569	NaN	6.97691	NaN	4.64684	3.04618	NaN	NaN	0.930319	NaN	NaN	NaN	NaN	6.11621	NaN	4.0159	NaN	NaN	NaN	NaN	NaN	NaN	4.68955	1.03817	NaN	1.12011	NaN	2.46609	2.39137	NaN	NaN	NaN	3.73538	NaN	NaN	NaN	NaN	NaN	2.23974	0.943129
NaN	NaN	NaN	NaN	0.326862	NaN	0.385535	NaN	NaN	NaN	0.546508	0.375996	NaN	0.522657	0.5291	NaN	0.934579	NaN	0.798212	0.554078	0.651423	NaN	0.767048	0.759013	NaN	NaN	0.590668	1.03257	NaN	NaN	NaN	NaN	NaN	NaN	NaN	NaN	0.524769	1.11858	NaN	0.607718	0.891663	0.493949	0.661726	NaN	1.53754	2.92252	0.860141	1.15162	NaN	NaN
NaN	2.35949	NaN	NaN	NaN	0.83382	1.41643	NaN	NaN	NaN	NaN	3.09272	NaN	NaN	NaN	3.45925	NaN	1.86703	1.49486	NaN	NaN	4.31351	NaN	2.38158	1.4646	NaN	NaN	112.724	15.1936	5.80417	NaN	0.807363	NaN	NaN	NaN	91.9202	13.891	19.0136	NaN	54.6717	33.3801	NaN	103.687	4.53556	1.91373	5.74845	NaN	18.2635	8.74508	NaN
NaN	NaN	NaN	NaN	NaN	1.31935	NaN	0.62422	1.74831	NaN	NaN	NaN	NaN	0.805088	NaN	NaN	1.06391	1.83335	NaN	NaN	NaN	1.32547	NaN	2.76518	NaN	NaN	1.7642	3.85981	NaN	0.306035	NaN	NaN	NaN	1.07323	4.75466	NaN	NaN	3.0773	3.3865	NaN	1.99657	NaN	5.65259	4.77623	4.41735	5.35992	8.79894	0.732493	NaN	3.36112
0.197465	NaN	NaN	0.354799	1.45026	0.213484	NaN	0.168376	NaN	NaN	0.255754	NaN	NaN	0.334348	0.261076	0.221705	0.94509	NaN	1.11167	NaN	0.460638	0.075092	0.0793903	0.139229	0.0862664	0.18443	NaN	NaN	1.08919	0.0711794	NaN	0.189757	NaN	NaN	NaN	NaN	0.331983	0.0891822	NaN	NaN	0.0607238	NaN	NaN	0.156996	NaN	NaN	NaN	NaN	NaN	0.167244
NaN	NaN	NaN	0.806842	1.15233	NaN	NaN	NaN	0.929973	NaN	NaN	1.32443	NaN	0.963484	NaN	1.22249	0.65304	NaN	NaN	1.12751	NaN	NaN	3.2375	NaN	1.91062	0.604888	1.73415	NaN	NaN	NaN	NaN	NaN	1.07062	1.23752	NaN	2.558	1.64252	NaN	3.12588	NaN	2.92543	NaN	1.23897	1.65546	1.14536	2.00698	3.86892	1.13807	1.76897	NaN
20.6501	12.4194	16.2001	32.6254	NaN	NaN	NaN	41.7397	14.9965	30.7948	NaN	25.8371	NaN	16.4973	3.10723	NaN	51.4245	NaN	7.72977	NaN	NaN	NaN	NaN	NaN	NaN	16.3401	22.3254	26.976	2.62412	NaN	29.8392	NaN	8.93256	NaN	NaN	27.3217	140.833	NaN	NaN	56.6315	11.2245	1024.35	NaN	NaN	44.8813	NaN	NaN	NaN	NaN	NaN
NaN	NaN	NaN	1.14453	0.68653	1.32956	NaN	1.06803	NaN	NaN	1.49111	2.32315	NaN	NaN	NaN	NaN	1.44065	3.43737	1.11012	1.38696	NaN	3.55758	2.41057	NaN	NaN	NaN	NaN	1.17745	2.32992	9.20895	NaN	NaN	NaN	2.34137	2.48466	NaN	NaN	2.20075	NaN	NaN	NaN	33.3467	NaN	1.8304	NaN	NaN	1.66176	1.91461	3.54811	3.28084
NaN	2.24492	1.28699	1.12942	NaN	4.67617	1.29129	2.60505	NaN	NaN	NaN	1.4229	NaN	1.23887	2.21911	2.99634	NaN	NaN	1.00691	1.63902	NaN	1.81924	0.923617	NaN	NaN	1.20957	NaN	NaN	1.80757	3.6398	NaN	NaN	1.10783	NaN	1.20195	NaN	NaN	NaN	0.719839	0.56443	NaN	NaN	0.761035	1.53452	1.58371	0.661989	0.6222	NaN	NaN	NaN
NaN	0.21548	0.521268	NaN	NaN	0.390808	NaN	0.300174	0.408113	NaN	NaN	NaN	NaN	0.416441	NaN	0.647249	0.474001	NaN	NaN	0.749681	NaN	NaN	3.40483	NaN	NaN	0.296754	NaN	1.04133	NaN	NaN	NaN	0.746157	NaN	0.473597	NaN	NaN	0.416216	NaN	NaN	0.616751	1.17246	NaN	0.991473	0.560852	0.9997	1.04076	0.766754	1.31989	NaN	1.31652
NaN	NaN	0.274944	NaN	NaN	0.325182	NaN	0.158713	0.304915	NaN	0.292287	NaN	0.269034	0.407116	0.257573	0.47644	2.27516	NaN	NaN	0.308575	1.50335	NaN	0.267516	0.641766	0.248059	0.209367	NaN	NaN	NaN	NaN	NaN	NaN	0.277493	2.03786	NaN	1.46953	1.63916	NaN	NaN	NaN	0.400128	NaN	0.314465	0.586338	1.97344	NaN	0.776639	0.288342	NaN	NaN
NaN	1.05651	NaN	NaN	1.77648	NaN	NaN	NaN	NaN	NaN	NaN	1.97636	NaN	1.53177	1.62054	NaN	0.844381	NaN	0.715666	1.10569	NaN	NaN	2.13115	NaN	NaN	1.44202	1.34546	NaN	2.33225	2.33035	NaN	1.88622	NaN	NaN	1.98051	3.19142	NaN	1.90654	NaN	NaN	1.39731	NaN	1.65689	1.40256	NaN	2.4147	3.17339	NaN	2.05276	1.28876
NaN	NaN	NaN	0.744823	0.88739	NaN	NaN	0.749962	0.902935	1.10535	0.927386	0.611396	0.620887	NaN	NaN	NaN	0.781311	1.27959	NaN	0.545852	0.805802	NaN	NaN	NaN	NaN	0.649941	0.644662	1.58687	0.876347	0.437713	0.939938	0.443341	NaN	0.761441	NaN	NaN	0.43802	NaN	NaN	0.636051	0.846955	NaN	0.335267	NaN	0.67331	NaN	NaN	NaN	0.715768	NaN
NaN	NaN	4.0308	NaN	NaN	20.4947	10.0465	NaN	NaN	NaN	4.60639	12.8363	NaN	20.6415	NaN	4.33144	NaN	NaN	50.1379	NaN	NaN	5.99054	49.6549	84.6024	NaN	NaN	NaN	NaN	NaN	29.7956	NaN	NaN	NaN	NaN	NaN	247.776	77.6157	43.7254	149.896	13.4021	20.1706	23.8328	73.5348	32.924	49.4903	17.3196	134.501	16.398	6.20347	NaN
5.04134	NaN	NaN	3.92065	NaN	8.62515	NaN	NaN	NaN	3.07806	2.71098	5.57165	7.78634	4.42654	8.14797	4.34499	5.10725	NaN	NaN	NaN	3.26083	NaN	6.83527	NaN	NaN	NaN	NaN	5.79744	NaN	8.26515	3.92218	12.1683	9.88924	11.9353	2.02302	NaN	NaN	NaN	NaN	9.20132	11.3851	NaN	NaN	NaN	7.85978	5.55124	5.73724	16.6872	5.25127	11.7217
1.55227	NaN	NaN	4.58842	1.22351	1.88832	0.937471	NaN	2.62757	NaN	1.88997	1.60583	NaN	NaN	1.196	5.05663	7.78937	NaN	4.05318	11.131	NaN	NaN	1.84223	NaN	NaN	NaN	NaN	1.94326	2.70453	1.16295	0.437369	1.22847	NaN	2.06041	1.37935	1.34394	NaN	NaN	1.37597	NaN	0.797766	NaN	NaN	2.79838	1.0319	1.9126	NaN	1.34693	NaN	NaN
NaN	NaN	NaN	NaN	NaN	0.380228	28.1215	NaN	NaN	NaN	0.266461	0.346033	NaN	0.182419	NaN	0.302325	NaN	NaN	0.301123	0.354271	0.321492	0.352622	NaN	5.10569	0.91191	NaN	0.589345	0.478469	0.259121	0.139289	NaN	0.261431	0.540658	0.308062	0.314209	NaN	NaN	NaN	NaN	0.117983	0.188569	NaN	NaN	NaN	0.133213	NaN	0.235338	NaN	0.387477	0.239578
1.5029	2.20536	NaN	NaN	NaN	NaN	NaN	NaN	1.07484	NaN	1.66967	0.918695	NaN	NaN	1.33989	NaN	NaN	1.3942	1.34653	1.00023	1.23245	4.61595	NaN	NaN	1.18561	NaN	3.89484	2.19467	1.68577	NaN	0.956572	1.93551	NaN	NaN	1.43262	NaN	NaN	NaN	3.25669	1.83999	2.08664	NaN	5.90493	2.56036	NaN	NaN	4.54752	NaN	1.89484	2.97124
1.26743	NaN	NaN	0.423801	NaN	NaN	NaN	NaN	NaN	NaN	0.965251	1.67515	NaN	NaN	NaN	NaN	1.40034	0.720461	NaN	NaN	0.99108	2.24654	1.15981	1.58393	NaN	NaN	0.59609	3.06523	NaN	NaN	NaN	3.08785	3.01032	2.25164	NaN	1.36372	1.23724	1.997	NaN	1.81163	2.29253	0.480146	11.4409	2.14947	1.36556	2.39532	2.45453	2.73224	3.0721	1.17831
NaN	NaN	NaN	NaN	1.69457	NaN	NaN	0.856898	1.16201	NaN	2.3461	1.09831	1.07226	1.01914	NaN	3.24107	1.20224	NaN	2.20424	NaN	2.85437	1.16174	NaN	NaN	1.38447	1.54545	NaN	1.85787	0.997506	NaN	NaN	1.75012	1.63824	2.18718	NaN	NaN	NaN	NaN	NaN	2.27599	NaN	NaN	1.81653	NaN	3.2817	3.27697	2.33405	3.9557	1.56055	1.66085
0.998702	2.75687	1.89988	2.55617	NaN	NaN	NaN	NaN	0.775615	NaN	1.70899	1.07893	NaN	1.04237	1.13605	NaN	0.733676	NaN	1.85653	NaN	NaN	1.14817	2.24351	2.14643	NaN	NaN	1.45465	0.871004	NaN	1.1626	NaN	NaN	2.76947	NaN	NaN	1.75871	3.78487	NaN	NaN	5.01429	1.71007	NaN	NaN	0.719321	3.55581	2.5294	2.88642	2.67115	NaN	NaN
NaN	0.361938	NaN	NaN	0.542505	0.934405	1.32249	NaN	0.850485	NaN	NaN	NaN	1.10516	NaN	1.12871	2.59983	0.753125	0.76266	0.56654	NaN	NaN	NaN	NaN	NaN	0.666267	1.74929	NaN	0.455456	1.12663	NaN	NaN	NaN	0.483208	NaN	0.425098	0.699056	0.482649	NaN	NaN	0.349675	0.870398	NaN	2.67838	NaN	NaN	0.623792	0.884251	0.318046	0.740138	0.546358
NaN	NaN	2.58659	1.45962	1.91219	NaN	0.691372	NaN	2.22099	NaN	0.894935	0.551755	1.45754	1.32949	NaN	1.15558	1.26113	NaN	NaN	1.02992	1.2772	NaN	NaN	NaN	1.35785	2.31476	1.26191	1.67518	2.0178	3.2924	NaN	NaN	NaN	NaN	1.28039	1.60529	1.28853	NaN	NaN	3.24391	1.79927	NaN	NaN	1.96943	1.96232	1.6573	NaN	1.46785	2.25815	NaN
NaN	0.42244	NaN	NaN	0.706514	NaN	NaN	0.321151	0.678702	NaN	0.637674	0.653424	0.397883	0.481835	NaN	NaN	0.971817	NaN	NaN	NaN	0.278816	0.618697	0.534788	NaN	NaN	1.00669	2.28191	1.37491	0.702099	NaN	NaN	NaN	0.501958	0.744712	NaN	NaN	NaN	0.723066	1.16416	0.481348	0.798786	NaN	0.80109	0.664099	0.719011	7.02445	1.69116	4.08013	0.730994	NaN
NaN	NaN	NaN	0.855944	0.395194	0.592733	0.611322	0.765287	0.623402	NaN	1.18737	1.00809	0.628378	NaN	NaN	0.709421	NaN	NaN	NaN	0.693097	0.518618	0.92816	0.946701	0.435161	0.343926	NaN	NaN	0.99167	0.837381	NaN	NaN	NaN	NaN	1.49363	NaN	1.65541	1.0654	NaN	0.555648	0.708567	NaN	0.697399	1.49889	0.654922	1.23035	1.93263	0.739262	NaN	NaN	NaN
0.730941	1.19507	NaN	NaN	1.159	0.919118	0.972101	0.466527	NaN	NaN	1.07346	1.59895	0.79164	NaN	2.20702	NaN	NaN	NaN	NaN	0.765111	1.05262	NaN	NaN	NaN	NaN	1.27766	1.14917	NaN	0.958222	NaN	NaN	1.9741	0.762776	0.982222	1.46424	NaN	0.494633	1.26525	NaN	NaN	1.30945	NaN	1.40714	1.54567	1.27678	1.73974	2.10438	1.75642	1.56052	1.80346
NaN	0.3779	0.379377	0.666001	0.753296	0.624415	NaN	0.551359	NaN	0.632351	0.583329	0.691563	0.749681	0.520237	0.664187	1.2652	0.688184	NaN	0.61512	0.90843	0.531237	0.510621	NaN	NaN	NaN	0.472724	NaN	NaN	0.803535	0.530729	NaN	NaN	0.37103	0.449944	NaN	NaN	NaN	NaN	NaN	NaN	0.492053	0.542241	0.691515	0.316556	NaN	0.595948	NaN	NaN	NaN	NaN
10.5597	NaN	15.5337	64.8803	3.58937	NaN	226.009	45.1651	11.3225	NaN	4.55747	NaN	NaN	NaN	NaN	22.0478	NaN	NaN	1.03288	54.5167	NaN	NaN	NaN	0.94679	13.3584	NaN	1.16343	1.21561	4.82765	8.38504	0.627589	0.758898	5.34702	1.28901	0.658025	2.15142	NaN	NaN	233.59	0.706414	NaN	NaN	79.9488	0.959785	NaN	NaN	2.2951	NaN	0.68055	NaN
1.15312	NaN	NaN	NaN	1.8198	1.52546	0.855652	NaN	1.30899	NaN	1.49388	1.27202	1.18196	0.945269	0.884173	1.17288	1.26441	NaN	1.30955	0.97352	NaN	NaN	NaN	NaN	NaN	0.696137	NaN	1.84614	1.7082	0.700476	NaN	1.43991	0.412763	0.735186	0.766636	1.00083	NaN	NaN	NaN	0.300634	0.738116	NaN	1.14124	NaN	NaN	NaN	1.0314	1.30683	0.767519	NaN
NaN	NaN	NaN	NaN	2.37349	NaN	1.14226	20.0196	NaN	NaN	3.09809	2.37428	1.34043	NaN	4.73238	NaN	4.50613	2.06577	5.47945	2.33062	2.61022	2.14611	NaN	1.45516	NaN	2.79885	NaN	1.69828	4.5043	NaN	NaN	1.72256	1.37923	2.31782	1.2706	NaN	1.32272	NaN	1.15034	NaN	3.02453	NaN	NaN	1.96159	NaN	NaN	1.91007	3.33834	1.28946	1.78012
NaN	NaN	NaN	NaN	NaN	0.769704	NaN	NaN	NaN	NaN	NaN	0.982511	0.683293	NaN	NaN	1.12618	0.830358	0.923446	0.624493	NaN	0.845738	1.12289	1.27036	1.46186	NaN	1.17467	0.985125	1.26936	0.767519	0.761731	NaN	NaN	0.898553	0.632631	NaN	3.69836	1.44386	0.962371	1.0755	NaN	2.92894	NaN	1.89022	1.42976	1.91033	1.67904	2.32439	1.88328	NaN	0.851064
1.38635	1.49808	1.53875	NaN	2.39217	1.53825	1.43234	NaN	1.15343	NaN	1.93738	1.18824	1.66931	1.04412	NaN	2.49526	1.10687	NaN	NaN	1.35705	NaN	NaN	1.52683	2.04641	NaN	1.52891	NaN	1.93877	0.743771	2.465	NaN	NaN	1.88175	1.92116	NaN	NaN	NaN	NaN	NaN	1.86362	5.05255	NaN	4.11455	2.24593	0.903342	1.39282	1.51048	2.26352	NaN	NaN
8.27403	NaN	8.97747	25.6377	6.36821	6.67512	1.50024	NaN	11.0419	NaN	29.2449	21.4404	7.19114	NaN	3.27493	NaN	NaN	12.2985	5.49964	NaN	5.27398	22.8029	7.21917	111.365	3.75813	12.2873	7.69882	11.3833	2.67623	14.4459	NaN	40.853	22.5601	NaN	29.4083	NaN	NaN	31.9632	9.64972	NaN	NaN	NaN	13.7291	16.0213	NaN	NaN	NaN	18.2522	NaN	NaN
NaN	NaN	NaN	NaN	NaN	NaN	1.71937	1.12929	1.02917	NaN	0.936417	0.987362	NaN	0.554201	1.18607	NaN	1.29631	0.906043	NaN	NaN	NaN	2.51427	2.49252	2.80198	NaN	1.05076	4.82532	4.09853	1.16477	NaN	2.08303	NaN	NaN	1.11177	NaN	NaN	3.59997	1.30852	1.6432	2.07676	6.30875	NaN	8.66927	3.02838	1.42951	2.81579	2.11878	1.51713	2.20872	NaN
NaN	1.28664	0.800897	0.776096	0.688326	0.864977	NaN	0.745545	NaN	NaN	1.26704	0.853607	0.590179	2.05267	NaN	NaN	1.07895	0.907276	0.577567	0.994036	1.38982	0.884877	NaN	NaN	1.20646	1.06687	NaN	NaN	0.985416	NaN	1.12504	0.817394	NaN	NaN	0.837731	NaN	1.07604	NaN	1.35223	1.08275	1.19864	NaN	NaN	1.32993	1.8208	1.1288	1.86818	1.11489	NaN	NaN
8.57486	5.10595	13.212	14.7512	10.105	27.0431	18.0479	37.8759	NaN	NaN	NaN	8.38856	18.1015	22.5723	NaN	3.67404	3.22425	NaN	11.706	NaN	NaN	NaN	8.02504	8.13935	5.42535	6.82594	37.3692	NaN	6.69165	NaN	2.7555	1.8058	9.26441	3.28569	2.58558	24.108	NaN	NaN	NaN	NaN	9.56663	3.10078	NaN	7.40466	6.36254	7.72797	11.0963	NaN	NaN	NaN
NaN	NaN	0.247586	NaN	NaN	NaN	NaN	0.28204	0.400946	0.468472	0.345949	0.257699	0.329424	0.46705	0.412712	0.4	0.47735	0.362384	0.579374	0.271069	1.02267	0.71582	0.492684	0.348554	0.387747	0.332149	NaN	NaN	NaN	0.355758	NaN	NaN	NaN	NaN	NaN	NaN	0.468538	NaN	0.483629	0.373664	0.523478	0.782718	0.5527	0.389666	0.458758	0.598086	0.524274	0.481858	NaN	NaN
6.92953	1.98165	3.22206	3.95726	1.27008	5.21948	2.73299	0.940557	NaN	NaN	2.24205	3.5084	4.17938	1.7522	3.9412	3.121	NaN	4.32115	NaN	3.83098	NaN	1.72873	NaN	NaN	NaN	2.70834	2.57162	NaN	0.838785	3.41041	1.98784	3.66354	NaN	1.60267	0.463349	NaN	NaN	NaN	NaN	0.308976	2.68161	NaN	2.31992	NaN	NaN	NaN	NaN	NaN	1.2386	2.31289
NaN	NaN	0.87512	NaN	NaN	1.27434	NaN	2.02704	NaN	NaN	1.80636	1.8384	NaN	1.53419	1.66842	1.04571	NaN	NaN	1.56208	NaN	1.51842	1.20032	2.58184	1.4898	1.22722	1.39482	NaN	1.0996	1.6826	1.82415	2.48274	NaN	0.841893	NaN	0.523177	0.780214	NaN	NaN	NaN	NaN	1.16147	NaN	1.27441	1.64201	0.965251	1.17443	1.7761	1.09311	0.526011	1.18103
0.242043	NaN	NaN	0.579173	0.72223	NaN	NaN	0.189631	NaN	NaN	0.515225	0.760514	0.675767	NaN	0.602809	0.954016	0.749794	NaN	0.530251	NaN	0.626763	NaN	NaN	0.902364	0.37955	0.545554	0.489428	0.455498	NaN	0.463242	NaN	NaN	1.05015	0.385342	11.1689	NaN	0.3108	NaN	NaN	0.340739	0.538503	NaN	0.394089	0.348153	0.37287	0.384054	0.450045	0.487733	NaN	NaN
1.27147	NaN	0.460215	1.10265	0.639468	1.45321	0.543863	0.865202	NaN	NaN	0.558098	1.45408	0.880592	0.965717	1.05565	0.857707	0.744214	0.728863	0.852079	1.36138	1.68936	NaN	0.777847	0.375164	0.713929	NaN	NaN	0.494927	0.715359	NaN	1.45336	NaN	0.571461	0.820277	NaN	NaN	NaN	NaN	NaN	0.399234	0.387958	NaN	0.690894	NaN	NaN	0.328774	0.407033	0.567279	NaN	NaN
3.60659	NaN	13.1778	1.03223	2.67365	0.887312	0.681338	0.584624	NaN	NaN	6.57808	2.77585	NaN	NaN	NaN	NaN	4.80284	NaN	NaN	NaN	9.49307	1.86734	25.74	NaN	34.6572	9.47418	6.26292	1.48586	NaN	NaN	NaN	8.17327	4.39348	13.282	NaN	NaN	NaN	5.57693	11.8437	2.38567	16.3209	NaN	10.9653	5.49783	21.9159	6.90799	3.47198	11.278	12.5638	8.48176
NaN	NaN	13.5833	8.31393	NaN	6.33232	5.70776	40.0112	20.2819	4.54483	NaN	NaN	18.6651	25.1263	NaN	6.88753	NaN	NaN	9.60338	NaN	NaN	3.69181	6.64496	7.19217	30.3481	NaN	5.48156	9.64506	NaN	36.4246	NaN	NaN	9.12076	NaN	18.5549	NaN	14.8291	39.5538	NaN	20.1187	16.8161	52.521	16.1038	NaN	20.7048	8.45237	5.99736	NaN	12.9021	20.209
3.65657	1.41169	NaN	1.46925	4.53268	NaN	1.14015	0.598946	2.738	3.108	1.54197	0.803988	1.44875	2.09881	NaN	3.24538	3.12715	3.0472	4.61276	1.95549	0.786287	1.14745	1.12135	NaN	NaN	2.0394	1.09191	3.33189	2.47543	NaN	NaN	NaN	NaN	1.41	0.701017	NaN	NaN	0.748615	NaN	1.17712	NaN	NaN	1.56211	0.519589	NaN	NaN	NaN	NaN	0.708968	0.975324
0.82203	0.660764	1.69583	0.76599	1.38364	1.03018	3.33678	NaN	0.642426	NaN	0.752899	0.598946	0.664319	NaN	NaN	0.801732	0.46823	NaN	0.413069	0.332358	NaN	0.836051	0.73779	1.37099	1.36307	NaN	0.794092	0.955475	NaN	1.24983	NaN	1.33898	1.22889	1.35726	NaN	0.98561	NaN	NaN	1.25005	NaN	NaN	NaN	NaN	1.41766	1.38993	0.662866	3.50067	0.992063	1.53534	0.646663
0.887154	NaN	0.347005	NaN	0.765873	0.57019	NaN	NaN	0.636618	NaN	1.30424	0.693001	0.290765	0.856825	NaN	NaN	0.764351	NaN	0.821828	NaN	0.936856	NaN	0.828775	0.369877	0.742501	0.819336	0.522876	0.981162	0.177035	0.329826	NaN	1.30017	0.657938	1.15717	0.872068	NaN	NaN	NaN	0.37201	0.64792	1.05688	NaN	NaN	0.908513	1.25483	0.829669	0.640492	0.982415	1.72554	1.35258
NaN	NaN	0.374336	NaN	0.427679	NaN	NaN	0.53516	0.318178	0.680411	0.219144	NaN	0.926956	0.309109	0.431704	0.621891	0.198488	1.75061	0.367688	NaN	NaN	0.539491	NaN	0.369304	0.337735	0.181795	0.65937	0.163417	0.279658	0.332149	0.365657	0.392989	0.32898	NaN	0.2962	NaN	NaN	0.389803	0.180587	0.345949	0.293436	NaN	0.0945001	0.225134	NaN	NaN	NaN	0.263394	0.295264	0.283591
NaN	1.01684	NaN	NaN	NaN	0.766871	NaN	1.30605	NaN	1.38864	1.30996	1.35024	0.884173	1.21451	1.37785	1.39886	1.93904	1.27252	1.78683	0.830772	1.31801	0.815661	1.0102	NaN	1.44128	NaN	1.24353	1.16212	1.74404	0.761151	1.0398	NaN	NaN	1.33355	NaN	NaN	NaN	NaN	0.893176	0.973236	0.679348	NaN	0.891027	0.993443	NaN	1.38821	0.819336	1.45565	1.13109	NaN
NaN	0.570613	0.639713	NaN	1.59317	NaN	0.599808	NaN	0.810176	NaN	NaN	2.40315	3.14733	0.7397	1.14326	NaN	NaN	1.00486	0.851064	0.483395	NaN	1.14903	1.29121	0.921234	NaN	1.22375	1.13474	NaN	2.81073	1.79778	1.24477	1.5329	0.68686	NaN	1.24308	1.36823	NaN	1.45607	NaN	NaN	1.3443	NaN	1.58624	0.895817	1.21449	1.47301	3.20133	2.42883	0.994135	1.02126
13.6385	NaN	9.47418	NaN	11.1524	2.30134	NaN	3.3618	35.0926	34.9113	2.58532	10.6824	NaN	29.6437	NaN	1.63899	13.4562	NaN	14.2863	NaN	NaN	NaN	12.9927	25.6351	NaN	NaN	10.548	6.46496	NaN	10.1329	1.67799	NaN	17.3596	NaN	14.9254	18.1038	717.772	NaN	9.60338	107.504	17.9485	499.8	NaN	21.3424	92.0387	18.6313	11.3175	48.0769	41.6858	12.3599
NaN	NaN	NaN	NaN	0.337325	0.569152	NaN	NaN	0.357987	0.175168	NaN	0.702741	NaN	NaN	0.755002	0.934667	1.10468	0.271341	0.567054	NaN	0.764701	0.583976	1.19399	0.819605	NaN	NaN	0.621234	0.77912	0.369604	0.528346	0.53011	0.634921	1.70253	NaN	NaN	NaN	0.732869	1.06486	NaN	0.775615	1.34187	0.458169	0.680689	0.701311	1.2185	1.75193	0.923617	1.05086	1.01354	0.929541
0.904977	NaN	NaN	0.907688	1.59337	NaN	NaN	NaN	1.56878	2.64131	2.19077	2.79548	0.952744	NaN	1.1289	NaN	1.23669	1.53102	1.30869	1.34461	1.09573	1.54326	NaN	0.698714	0.652401	1.43633	1.60287	NaN	1.58806	1.16587	0.940911	NaN	1.08088	NaN	0.820479	NaN	0.467727	NaN	NaN	0.949217	1.95718	NaN	0.9996	1.12006	1.09298	1.29951	NaN	0.831808	1.54145	0.993838
2.0917	1.13653	1.32207	0.957488	1.64055	2.46969	0.466287	0.99681	1.12186	4.34972	1.40447	3.33812	1.66706	1.5675	NaN	1.34895	0.470102	NaN	NaN	1.01079	6.32711	NaN	2.98677	1.58988	1.10072	1.07626	NaN	NaN	NaN	2.34786	4.92514	4.25858	1.40103	1.60277	37.6903	NaN	36.0451	1.26459	NaN	NaN	2.37665	209.775	0.737572	1.69454	11.7909	0.868508	NaN	NaN	NaN	NaN
0.926012	1.88292	0.581463	0.433971	0.340009	0.828089	0.513795	0.772201	0.679625	NaN	0.893416	0.543154	0.764059	0.869414	0.58126	NaN	NaN	0.373455	NaN	0.485413	NaN	NaN	1.01434	NaN	1.00528	0.702741	0.560381	1.23203	0.39909	1.79798	NaN	1.73747	0.497389	NaN	NaN	2.04767	NaN	NaN	0.840548	1.61841	1.15752	NaN	1.09601	1.924	2.43647	NaN	1.17382	0.789952	1.68865	NaN
1.88437	NaN	NaN	0.68055	1.36834	1.0964	1.13994	4.12728	1.50832	NaN	NaN	0.99295	0.837381	0.765052	1.21125	0.847458	1.15354	1.11409	1.01068	0.876808	0.848464	NaN	0.896539	NaN	NaN	0.794344	0.859033	NaN	1.16689	1.02701	0.704176	0.887705	NaN	NaN	0.709069	NaN	5.18081	0.748447	NaN	NaN	0.633553	NaN	2.11046	0.823113	0.908843	0.707163	NaN	0.707214	0.746491	0.990884
1.1358	0.81646	0.81182	0.166948	0.566701	NaN	NaN	0.37172	0.588166	1.287	0.478881	0.594424	0.797003	0.494315	0.457059	1.39803	1.03767	0.535103	1.50173	1.82983	1.01012	NaN	NaN	0.289679	NaN	0.851789	0.830634	0.596623	0.525486	0.798786	1.22561	NaN	NaN	0.171048	0.198523	0.07494	0.286008	NaN	NaN	NaN	0.776578	0.385505	0.195771	0.241721	0.343253	NaN	0.884408	NaN	0.119828	NaN
NaN	0.309828	0.453782	0.288276	NaN	NaN	0.830082	0.806322	0.560444	NaN	0.839208	0.435863	NaN	0.378831	NaN	NaN	1.00937	NaN	1.20012	0.226917	1.05506	0.884095	6.63438	1.91377	1.0456	1.22454	0.646496	3.3857	1.1534	0.497488	NaN	0.71053	1.14592	1.78699	NaN	NaN	1.00649	1.2088	NaN	NaN	1.97808	0.917179	1.03337	1.58758	3.63597	3.62293	2.61664	2.88276	2.4514	1.88189
NaN	0.469947	NaN	0.321699	NaN	0.596944	NaN	NaN	NaN	NaN	0.624727	0.40843	NaN	NaN	0.350668	0.238158	0.507279	0.332138	NaN	NaN	0.589588	0.46594	1.01708	0.694011	NaN	0.32602	0.674172	NaN	0.560758	0.344649	0.629802	0.405416	1.01548	0.527677	NaN	0.512059	0.60794	0.391543	2.7707	0.64222	0.670646	0.654108	1.25453	0.990099	0.912992	0.753693	1.05291	0.448813	0.665071	0.929109
0.519049	0.687522	0.590598	0.99552	0.730194	0.417502	NaN	NaN	NaN	NaN	0.569638	0.600925	0.622975	0.542682	0.613873	NaN	0.89071	0.433388	0.846095	NaN	0.927644	0.541947	1.26094	0.627392	NaN	NaN	0.595557	0.996512	1.0861	NaN	0.528374	NaN	1.10478	0.680828	1.50634	0.710177	0.983671	0.873668	0.910913	0.681431	0.873439	0.735727	0.769704	NaN	NaN	0.936768	NaN	NaN	0.88308	0.822842
NaN	NaN	0.384098	0.330929	1.20148	1.24076	NaN	NaN	NaN	NaN	0.94509	1.08764	0.630199	0.694444	NaN	1.09328	1.03276	0.802568	0.737572	0.764701	1.10872	0.954016	1	2.07258	0.604084	0.893416	0.554078	0.823181	0.798021	1.03869	NaN	0.945805	NaN	0.835422	1.12916	0.873744	0.594672	1.14007	NaN	NaN	0.938967	NaN	NaN	1.46124	1.27248	NaN	1.82359	0.874585	1.79343	1.7212
0.348189	NaN	NaN	NaN	0.407	0.95057	NaN	NaN	NaN	NaN	2.09828	0.580349	1.58313	NaN	0.763417	0.638162	0.463285	0.356341	0.166656	1.10067	0.447568	0.652742	2.56792	0.532935	0.378243	0.131971	0.885112	0.773335	0.290858	0.751541	1.1262	0.749738	2.2829	1.69165	0.810504	NaN	NaN	0.73443	NaN	0.34369	1.06239	NaN	2.20008	NaN	1.13053	1.47813	1.41255	1.2999	0.73373	0.91954
1.08625	0.417641	0.591996	0.24906	1.01819	NaN	NaN	NaN	0.907853	NaN	1.49589	1.04666	NaN	0.936067	NaN	0.221239	1.13891	0.33911	2.04298	NaN	0.807233	1.11539	4.81974	1.64807	0.929541	1.2103	2.09846	1.33019	0.70082	0.997407	0.598086	1.94107	0.807559	1.80235	1.19696	NaN	NaN	1.7411	NaN	1.52604	2.20907	NaN	0.492805	1.699	NaN	1.43279	2.34077	4.03063	1.30093	1.69941
2.32986	NaN	NaN	2.76595	1.80031	1.50085	1.34689	NaN	NaN	3.40483	NaN	2.60736	7.3959	NaN	2.88076	2.5468	3.641	2.67781	1.77054	3.20863	1.41788	6.87049	NaN	NaN	2.29637	3.30142	3.14693	1.74899	2.04729	NaN	2.02593	5.02841	4.91908	5.23917	6.14515	4.4837	0.823655	NaN	NaN	NaN	NaN	2.1352	4.24268	6.6454	6.18544	1.77819	7.21709	2.05124	5.39142	5.21322
0.763884	2.98054	0.239069	0.900576	NaN	5.8326	NaN	6.65602	1.41471	NaN	NaN	0.866026	NaN	0.703433	1.11167	0.712149	0.179485	1.53863	0.775615	NaN	3.1082	1.05507	0.803407	0.481881	0.423855	0.220221	1.19626	0.907276	0.425224	0.173295	NaN	0.369576	0.239854	0.594601	0.691994	0.25442	1.20863	NaN	NaN	NaN	NaN	NaN	0.54227	0.219534	0.259983	0.164574	1.62059	NaN	1.34142	0.899604
0.835841	0.473104	NaN	NaN	1.20237	0.335132	NaN	0.767931	0.659761	1.75012	0.222306	0.948857	NaN	0.718701	1.44436	1.60681	1.07503	NaN	0.887705	1.04729	0.389909	0.867679	0.498629	0.319061	NaN	0.759821	0.286722	0.394867	2.20318	0.453721	0.866101	0.356202	NaN	0.0909835	NaN	NaN	0.278342	NaN	NaN	0.249023	0.557849	NaN	NaN	0.551663	0.521458	0.931706	0.769941	0.593437	0.757805	0.437618
NaN	NaN	1.1797	1.20494	1.35567	0.433313	0.760341	0.909587	1.51607	2.42913	NaN	1.96707	NaN	1.06145	0.919625	2.54059	2.75255	1.28645	1.72819	0.712454	2.027	2.16011	1.27629	1.4101	1.16375	1.04833	1.23954	3.31016	2.39699	NaN	NaN	NaN	2.71894	NaN	NaN	2.18842	NaN	NaN	1.30779	1.2975	1.46462	0.853679	2.23524	1.43511	NaN	2.13972	1.93472	2.28802	NaN	2.11502
0.944733	1.38837	0.659109	1.93652	1.94825	0.549028	1.45973	2.49097	0.941708	3.00381	NaN	1.07574	0.779302	NaN	NaN	0.776397	0.455788	2.76449	1.59895	1.09335	1.35192	1.30695	NaN	NaN	1.19779	1.13716	1.16447	1.56321	1.14051	1.01992	0.510986	NaN	1.04297	1.42922	1.08789	NaN	1.3741	NaN	0.547765	NaN	0.786164	NaN	NaN	NaN	0.926784	NaN	0.930319	1.00422	1.16448	0.348311
0.697107	1.35417	NaN	1.05839	NaN	0.617055	0.652784	0.458148	NaN	NaN	0.920133	0.437848	0.640533	0.728969	NaN	0.480908	0.971534	0.639427	1.10973	0.578403	1.17886	NaN	1.0257	1.0948	0.492587	0.701804	0.923191	1.06692	NaN	0.555957	0.882535	NaN	0.787464	0.782473	0.909504	0.70205	NaN	NaN	2.70548	1.55145	0.87184	NaN	0.861846	NaN	1.22002	1.40036	0.652528	1.29172	NaN	1.10534
0.641272	NaN	NaN	NaN	1.54863	NaN	0.349736	0.43852	0.517706	NaN	1.48019	1.33806	0.648845	0.783331	1.27152	0.716897	0.662339	NaN	0.773994	0.975515	1.93998	0.99552	1.94401	1.35426	NaN	0.83689	1.04119	NaN	0.760341	1.35864	1.03074	1.40602	0.610874	1.6629	1.25287	1.65385	NaN	NaN	NaN	1.50029	1.56588	NaN	0.368922	1.36883	1.50353	1.45732	1.76202	1.24749	1.34299	1.89645
NaN	0.561703	0.657246	0.519211	0.720409	0.505076	0.669837	0.716486	1.00657	NaN	0.789889	0.977517	0.384912	0.935804	NaN	NaN	0.613309	NaN	0.587337	0.428798	0.418848	0.791264	1.28737	1.72049	0.885896	1.13569	NaN	1.0029	0.556235	0.662164	NaN	NaN	0.954472	0.723537	1.15007	1.01848	0.979336	NaN	0.641519	0.9995	0.93835	NaN	0.408614	1.32721	NaN	1.11681	1.18124	0.946701	1.37076	NaN
NaN	1.06889	NaN	0.737083	1.16187	NaN	0.845738	0.785114	1.17704	NaN	1.04188	2.44152	1.25922	NaN	1.40388	NaN	1.54147	1.38646	1.88754	0.891981	0.690083	1.35314	1.66279	0.653509	NaN	0.914662	1.46218	1.36917	1.10743	2.30112	1.68067	1.4792	1.75571	1.18089	1.61977	NaN	NaN	NaN	1.05955	NaN	1.27372	NaN	0.765228	1.46537	1.09826	1.80904	2.12364	1.63535	1.69471	0.997805
70.8366	NaN	NaN	NaN	5.09347	47.2769	NaN	307.948	NaN	87.4585	3.88395	4.38385	55.0418	59.2347	36.7188	34.459	0.351025	3.11255	27.2665	21.1091	NaN	NaN	8.65576	4.20115	23.718	36.0023	20.6624	31.4209	200.574	NaN	20.3116	1.07073	NaN	NaN	25.1566	8.01667	0.513558	128.923	0.747999	NaN	0.977135	261.623	25.6141	NaN	12.4969	2.503	0.785423	3.98391	1.84785	12.0463
0.800192	0.600853	NaN	NaN	0.676178	NaN	0.491787	0.289452	1.03452	1.13193	0.52815	0.686248	0.570158	0.749232	0.416945	0.691276	0.525017	NaN	NaN	0.437598	0.690751	NaN	0.57277	0.541536	0.287414	0.305409	0.464922	0.818934	0.735943	0.627117	NaN	0.571265	1.6822	0.820479	1.12774	NaN	1.26789	NaN	0.925241	1.16626	0.850268	NaN	0.273823	0.714592	1.02366	0.665868	0.637349	0.520671	NaN	0.626488
NaN	0.407382	1.27052	0.703631	0.590633	0.586992	0.332303	NaN	0.817127	0.642096	0.84246	0.721709	0.937734	0.727273	0.558878	NaN	1.05482	0.729448	0.753579	0.775615	0.759129	0.474406	0.538039	0.718701	NaN	0.622742	0.723066	0.877347	NaN	0.711946	0.604522	1.10983	0.565099	0.561829	0.593507	NaN	0.309684	0.50615	NaN	NaN	NaN	0.3861	0.531124	0.487258	0.597336	0.813604	0.686295	NaN	NaN	0.620117
0.8142	1.31794	0.836051	0.617093	NaN	NaN	2.86156	NaN	0.645494	NaN	0.651423	0.525984	0.767813	0.550358	0.864827	0.824334	0.709019	0.675219	0.690942	NaN	0.70502	0.792644	2.00795	0.864977	0.592733	NaN	NaN	1.00835	0.589484	NaN	NaN	0.730834	0.931272	2.62178	0.736648	0.82122	1.21813	1.28783	0.786658	NaN	0.965904	NaN	0.667378	0.864678	1	1.07033	0.488401	0.846812	1.07415	1.36003
1.5352	NaN	NaN	5.42446	1.42422	1.46387	NaN	NaN	3.89423	4.00032	3.04664	3.91466	2.16268	3.07967	1.7924	0.981547	NaN	2.30659	1.66038	4.31202	1.0252	1.95458	NaN	3.47258	NaN	2.39935	2.89922	0.908678	2.65894	1.91795	NaN	1.16859	2.64341	1.03777	1.59995	0.391635	0.683013	2.81484	1.84584	NaN	2.69215	0.883783	4.66005	NaN	1.73801	1.96213	1.40772	NaN	0.797194	1.10974
0.75171	NaN	0.407432	0.884721	0.609979	0.561199	0.613648	0.414577	NaN	NaN	0.458085	0.644247	0.469506	0.219529	0.483652	0.484613	0.6595	NaN	0.636456	0.657981	0.933968	NaN	0.686248	0.363835	0.535045	0.813008	NaN	0.57019	0.587786	0.394353	NaN	NaN	0.427936	0.495516	0.31248	0.318421	0.388802	0.42389	0.490509	0.530983	0.621465	NaN	0.332712	0.308005	0.921744	0.544573	0.676087	0.388546	0.515836	NaN
1.15988	1.0767	1.00367	NaN	1.20341	1.23582	0.846239	NaN	1.38862	NaN	1.89412	1.0306	1.1048	0.783822	NaN	1.12442	1.57262	NaN	1.48245	1.03317	1.13552	1.54856	NaN	1.84441	1.56023	1.09611	0.780701	1.92515	1.5141	NaN	1.64576	1.62623	1.09041	1.32013	1.05647	1.41999	1.49795	NaN	1.15473	1.42406	2.11842	NaN	1.75716	1.61051	1.81488	2.19804	0.986777	NaN	1.82568	2.31075
0.360802	0.421603	NaN	0.799488	NaN	0.273015	0.407133	NaN	0.280183	NaN	0.508182	1.14989	0.203223	0.243072	0.345185	0.508595	0.388048	0.358449	0.291019	0.251206	0.854263	0.868357	0.358783	0.393964	0.172921	NaN	0.577767	0.329131	0.556235	NaN	0.249451	0.320729	0.169282	NaN	0.408597	0.207052	0.965904	NaN	0.321989	0.335886	0.458905	NaN	0.150843	0.337678	0.303343	0.265301	0.336214	0.312295	0.225104	NaN
1.59454	6.66533	3.86011	NaN	1.61259	7.92079	0.814465	2.59558	1.36312	NaN	7.48167	4.55747	NaN	10.8482	NaN	0.852297	8.69565	1.12827	2.01743	NaN	NaN	15.4887	2.3704	7.34592	33.919	9.65158	2.73748	10.442	1.73913	4.1437	NaN	2.05651	28.1286	1.44448	11.8754	NaN	40.4514	14.3986	4.19569	17.9388	2.17927	331.411	NaN	35.2473	18.1035	4.38462	NaN	1.69779	4.22726	3.56125
1.21731	NaN	0.682594	1.60821	1.75046	1.13794	0.494218	0.299679	0.423245	NaN	1.37482	NaN	0.869717	0.960984	1.06898	1.27306	0.886918	NaN	1.02882	1.00168	0.502816	3.11449	0.491835	0.593789	0.527176	NaN	0.761325	0.316006	1.41659	1.00601	1.29309	NaN	0.522958	NaN	NaN	14.2076	0.261513	NaN	0.389514	0.243167	0.380199	0.33437	0.712251	0.605804	0.429221	0.447928	NaN	0.545346	0.22246	0.611247
8.1215	1.84345	12.548	10.2547	28.8917	38.7252	1.90074	3.95523	40.5104	NaN	14.4053	91.8358	18.6244	19.8232	NaN	6.69837	NaN	1.12409	13.0171	25.7083	NaN	19.6317	88.0437	37.6591	NaN	7.01853	NaN	31.348	NaN	22.5464	13.3136	7.25742	122.339	31.8137	33.7154	22.3259	437.12	104.053	NaN	77.6277	81.057	6.90846	NaN	20.0124	28.3206	233.585	13.5746	86.1178	30.1632	9.44376
1.29884	1.11143	NaN	1.256	1.35597	0.697156	NaN	1.13478	1.21855	NaN	0.981354	3.23583	1.59167	1.51812	2.40113	1.62729	1.29333	1.516	0.782411	4.00705	1.39599	1.19168	1.04359	1.20866	NaN	0.898796	1.24869	0.596019	0.969932	2.68327	1.47861	NaN	0.886918	0.759013	1.29202	0.57277	0.715871	NaN	NaN	0.535791	1.10433	0.665513	0.803148	NaN	0.795292	1.12168	2.62688	0.833403	1.20424	0.339547
NaN	NaN	NaN	1.46578	1.37552	1.17324	NaN	0.889205	NaN	1.12988	1.02956	1.04141	0.964227	1.06519	0.718959	1.06561	1.09924	0.978569	1.10958	0.890789	0.863558	0.548185	1.1512	0.853534	0.991375	0.579274	0.914578	0.762486	1.37656	1.39665	1.32922	0.875274	NaN	0.791202	0.796622	1.00528	NaN	NaN	0.817327	0.597836	0.563889	0.480723	0.805347	0.888573	0.941531	0.664011	0.981258	0.782779	0.830979	0.786225
NaN	0.432115	0.478332	0.589901	0.470921	0.513769	0.483723	0.500125	0.387012	0.297018	NaN	0.34167	0.383568	0.502462	0.860437	0.717927	0.407814	NaN	0.679763	0.203948	0.373776	NaN	0.952381	0.325436	0.269614	0.359958	0.329045	NaN	0.325097	0.672948	0.384172	0.480608	0.211265	0.346837	NaN	0.189595	0.460384	0.243546	0.243191	0.274363	0.26313	0.312911	0.462663	0.189797	0.255395	0.222643	0.570418	0.532794	NaN	NaN
0.522548	0.421017	NaN	1.07785	0.436243	1.57366	0.441794	0.451427	0.394555	NaN	0.56224	0.971912	0.549119	0.574185	0.571657	1.74612	0.538764	NaN	0.306241	0.314347	0.700427	NaN	0.48459	0.611696	0.852152	0.360153	0.743937	0.501605	0.560727	0.601034	0.655437	0.708416	0.588963	0.582309	NaN	0.735889	0.762951	NaN	0.383156	0.5148	1.28108	NaN	4.07299	0.621659	0.708818	1.21121	3.89287	0.839278	0.916338	NaN
NaN	0.414456	0.861772	NaN	0.791891	0.372731	0.506997	1.00591	1.00212	NaN	1.3939	0.848464	0.759994	1.14318	0.66912	0.510412	0.931446	0.748055	1.42225	NaN	0.621427	0.928074	5.39113	1.39115	0.491304	0.452141	NaN	1.83046	0.492659	0.532056	NaN	2.17429	1.64601	1.2946	2.16882	1.58158	3.07882	1.14175	0.531972	0.93668	0.803213	1.61663	0.6879	0.639427	NaN	2.3139	1.52033	0.748671	1.62101	2.19771
3.45674	1.25647	3.64777	NaN	12.2267	11.7473	5.62493	3.98533	22.1848	NaN	2.5622	6.41643	NaN	12.4875	5.88062	NaN	6.99007	10.1491	NaN	1.63201	0.953562	11.7386	2.7922	16.2797	9.6918	5.46627	4.68516	5.72803	1.68845	NaN	4.69947	34.825	11.4222	24.4153	39.7646	9.84737	4.27497	NaN	0.9995	7.77303	4.03144	1.10153	NaN	25.9525	14.9285	5.15623	17.428	10.8533	40.3567	18.6846
NaN	0.855944	NaN	0.957763	2.72814	0.910581	1.2578	0.999301	1.19534	2.30447	1.72345	0.887154	2.59612	NaN	0.616219	2.04357	1.67825	0.938879	1.24434	1.49591	2.19814	0.791014	NaN	0.430775	1.27967	NaN	1.07787	1.00993	1.34214	1.70413	2.66248	1.21174	NaN	0.791139	NaN	0.630955	0.552669	0.319857	0.918611	0.639877	0.830151	NaN	1.47947	0.929023	0.498778	0.933794	1.25778	1.11132	0.671862	1.16496
1.07703	1.70164	0.693577	1.18782	0.546986	1.24332	0.670916	4.78973	1.0825	NaN	1.27026	1.03213	NaN	1.16118	1.12011	1.64031	1.74426	0.393809	2.03488	2.97965	1.19456	0.339963	5.28206	1.23744	2.01171	1.62182	0.635526	2.36429	2.48521	1.7313	NaN	1.38093	2.64613	3.67309	1.69932	0.79384	NaN	0.893336	NaN	5.42476	2.18943	NaN	NaN	1.99462	1.76326	2.24215	NaN	1.12973	1.59515	1.99824
0.913242	1.0968	1.60044	0.470633	0.800705	0.227848	NaN	0.972857	0.536798	0.604266	0.841893	0.631074	0.467508	0.608791	0.369727	0.917936	1.12556	0.397915	1.6129	0.621234	0.981066	0.24351	0.350606	0.446209	0.386907	0.346212	0.464425	0.413035	1.53617	0.378286	0.602156	0.594919	0.280065	0.742666	NaN	0.157873	0.229579	0.652358	0.343572	0.358153	0.388365	NaN	0.616105	0.343607	NaN	0.284438	0.373916	0.381083	1.16771	NaN
0.997705	NaN	NaN	0.872448	2.05546	NaN	0.644829	NaN	1.17499	1.20334	0.424971	1.03952	0.522412	0.936944	0.704325	1.66149	1.90887	0.624103	1.38587	1.19349	1.09426	0.504745	NaN	1.25482	NaN	0.135364	0.576901	0.980008	2.4639	0.529745	1.244	1.00113	0.391497	1.78779	0.735835	0.409484	0.393035	NaN	1.15899	0.645203	0.449176	0.398979	0.879662	0.489285	0.828912	0.574415	0.526454	0.762776	0.571657	0.791014
3.44104	1.45868	0.997108	0.973615	1.81045	1.31619	NaN	NaN	1.9213	7.26639	2.46816	1.77642	NaN	2.30277	NaN	2.31616	1.77098	1.62731	1.53825	0.601793	3.08376	1.43823	2.61958	3.63994	2.49813	3.13617	1.92071	1.77538	NaN	1.07648	NaN	3.16386	4.14525	3.17319	4.33125	1.10659	1.29458	1.60943	NaN	3.4565	3.54623	2.28113	0.815262	3.36904	4.52059	4.47427	2.76985	4.69594	7.35348	3.64047
0.894935	1.63087	NaN	1.87719	1.63669	2.15871	3.4785	1.74113	1.82395	NaN	1.18256	2.18384	2.7622	2.31118	2.20605	1.43885	1.0554	NaN	1.02514	1.2381	1.02757	2.71032	NaN	2.77747	NaN	3.42431	0.988045	1.73696	1.32251	0.808081	2.62364	3.57105	2.26716	2.98811	3.71927	1.80157	1.67977	3.51284	2.40848	NaN	2.1042	NaN	1.6302	3.94322	2.78598	1.47486	1.56831	1.04059	2.99106	4.20292
1.50256	1.54204	NaN	2.43173	1.34338	6.08828	1.87635	2.79376	1.65166	1.59325	1.4242	2.60838	2.34687	4.05877	1.30302	NaN	1.54952	1.6402	1.94996	2.19481	NaN	1.38837	NaN	1.7819	0.978761	1.13086	0.834724	1.16657	1.60511	2.60383	3.1176	2.04057	2.00747	1.15511	2.195	1.1277	0.764059	0.68653	NaN	NaN	NaN	0.725216	1.06273	1.29366	1.22626	0.854263	1.62245	0.692041	1.51837	1.19746
0.218575	0.336135	NaN	0.252755	0.15747	0.0780275	NaN	NaN	0.26528	0.44603	0.384763	0.885034	0.0141315	0.138633	NaN	NaN	0.691276	0.0825491	0.288825	0.171503	0.32602	0.164571	0.559973	0.808865	NaN	0.369072	0.469153	0.43083	0.700918	0.10281	0.273913	0.509347	0.483302	0.13614	0.338627	NaN	0.57607	0.845738	0.435331	0.459982	0.574581	0.469814	0.0607497	0.578503	0.913993	0.575407	0.849618	0.625939	0.927902	0.573066
0.813604	5.20616	1.27238	0.378716	1.79118	1.21293	NaN	NaN	0.949127	NaN	1.08519	0.565195	0.745879	0.598802	1.37491	1.10359	0.828089	NaN	0.667557	0.7259	1.16187	NaN	1.18025	1.41399	1.85196	0.510673	1.17303	3.5121	0.870928	0.818867	1.19686	1.07109	0.498405	1.23107	0.7373	1.12153	1.23426	1.34951	1.00476	1.47621	1.42144	NaN	6.52443	1.66722	1.41553	1.50482	1.32121	3.89499	1.98649	NaN
1.0268	0.8088	1.67586	1.02368	1.41207	0.77918	1.50544	NaN	0.77912	NaN	0.763767	1.09983	0.928591	0.844309	1.33099	1.07735	0.653296	0.958313	0.748279	0.773276	0.977231	0.892618	1.27367	NaN	0.483115	0.678564	1.00954	1.14021	0.611546	NaN	NaN	NaN	0.704077	1.23822	0.775434	1.41581	2.15889	0.945269	0.716538	1.62662	1.62975	NaN	2.0384	1.11823	0.929627	0.900657	1.57709	1.67227	1.29237	0.920471
0.375671	0.294395	0.545971	0.395351	0.514271	0.842744	NaN	0.879507	0.357948	0.855944	0.70497	0.801667	0.29152	0.884173	NaN	0.49724	0.577935	0.587061	0.639386	NaN	0.528346	0.415921	0.472612	0.311013	0.406372	0.26552	0.732011	0.671141	0.803729	0.457896	0.645786	0.382585	0.344317	NaN	0.293255	0.513637	NaN	0.331862	0.753125	0.20057	0.329413	0.199017	0.498753	0.30932	0.518807	0.472791	0.791515	NaN	NaN	0.331356
NaN	1.37946	NaN	NaN	1.04897	NaN	1.08315	NaN	1.11167	1.0153	1.73605	1.20525	1.43248	0.570028	0.909835	0.872981	1.48798	1.57503	1.66873	0.630795	1.57085	1.21398	1.02777	1.47767	1.20978	0.486429	1.55439	0.978186	1.19073	0.781922	1.09137	1.5805	1.11537	1.24933	1.40566	1.4867	NaN	NaN	2.06804	1.1211	1.59627	0.810701	1.51501	0.764585	1.88573	1.0116	2.27164	1.59383	1.95783	1.5866
1.45988	1.94077	0.96302	NaN	1.41423	2.25728	1.79578	0.726639	NaN	NaN	1.22811	2.16553	1.04849	3.6519	1.25063	0.914327	2.05229	NaN	1.6197	1.85048	2.77316	2.30574	6.58155	3.45961	2.72331	1.96475	1.96967	2.58284	1.09911	1.22614	1.37777	NaN	3.44828	4.17886	2.27345	1.74462	2.4273	NaN	2.95998	3.1507	2.95823	1.48139	1.61295	2.52736	2.39074	4.33238	5.23259	3.20061	3.57667	4.69131
0.947508	0.488735	0.4363	0.593824	0.483045	0.683153	0.569379	NaN	NaN	0.367202	0.585137	0.341658	NaN	NaN	0.575175	0.765228	0.430719	1.10427	0.843455	NaN	0.576269	0.63743	1.21569	0.468318	0.577467	0.631433	0.568763	0.549753	0.566444	0.716025	0.748839	0.655695	0.588789	0.582174	0.585823	0.831947	0.788208	0.690036	0.571592	0.590982	0.860215	0.471054	1.81409	0.92687	0.84538	0.829256	0.602119	NaN	0.916422	0.565099
1.88533	1.08661	1.63546	NaN	1.65804	1.11116	0.741675	NaN	NaN	NaN	1.10398	1.46458	1.16216	0.859623	1.53946	0.966931	1.03232	1.12843	1.03137	1.2097	1.09126	1.4945	1.75322	1.47846	NaN	0.577234	0.427606	1.18261	1.54602	0.874508	1.85154	1.72366	0.907276	1.1617	1.42001	1.54038	1.07106	NaN	1.80619	1.08854	1.88843	0.653296	2.02036	1.53268	1.51623	1.55904	1.71591	1.21861	1.85925	2.02188
1.54974	1.66931	1.53671	NaN	1.45881	1.65399	2.08069	1.84328	1.46291	NaN	2.32234	2.02384	1.38821	1.60774	7.06065	1.24775	1.74237	2.22911	1.9916	1.01977	1.06501	1.83274	2.48855	3.58461	2.59329	1.64074	1.66135	3.16646	2.7407	2.75156	NaN	NaN	3.03122	2.47042	1.92271	1.78348	1.83375	2.68334	NaN	2.2245	2.35255	NaN	2.394	1.50313	2.3801	3.32215	2.29816	2.60193	2.38243	1.954
NaN	0.722752	0.622161	0.914913	0.914495	0.752389	2.27692	NaN	0.929541	0.809979	0.819068	2.09083	NaN	1.03498	1.06928	0.790326	0.905223	1.11009	0.895576	0.834724	0.667468	0.868056	0.985319	1.18773	1.02574	1.06783	1.35995	0.993344	3.96416	1.05129	1.02572	1.32591	NaN	1.01012	1.24473	1.2553	NaN	NaN	1.63921	0.689941	0.843882	0.50746	1.63268	1.38451	1.01656	1.45309	2.3376	1.89879	1.92223	0.87604
0.591296	0.315876	NaN	0.706364	1.05816	0.951203	0.223264	NaN	NaN	0.9802	0.947149	0.902935	0.195316	NaN	1.15984	0.394898	0.896057	0.655652	0.640082	NaN	0.6054	1.02396	1.27629	0.971062	0.381301	0.725163	1.32571	1.15553	0.495688	0.717669	0.989609	1.27134	0.793966	0.991277	0.492951	1.61332	0.374238	0.701902	NaN	0.621157	1.94088	0.620771	1.90924	1.28016	1.53626	1.56705	0.889047	1.02887	1.35635	1.15386
2.89796	2.22104	1.14434	1.30034	1.12136	2.54433	1.01379	1.80261	2.84698	NaN	1.68563	1.86815	1.97691	2.65259	2.50903	1.23723	1.37214	NaN	1.88196	2.35499	2.26757	1.97754	3.90579	1.48911	1.97847	2.04666	1.69085	2.38243	0.75188	1.23183	1.76451	3.15806	2.60661	2.83406	2.47231	NaN	NaN	NaN	1.78441	2.33035	2.25596	NaN	0.603646	2.13748	2.73486	2.47304	3.15666	2.71857	3.2603	3.24749
NaN	1.94466	1.17	1.21979	3.14703	0.840054	1.98169	NaN	1.8162	2.79611	2.56904	1.4099	1.20325	1.60792	1.167	1.64655	3.24433	2.06834	3.23719	1.16139	1.31896	1.23359	NaN	1.23593	1.019	1.13968	NaN	1.52441	3.85178	1.43653	1.34816	1.16048	1.59363	1.7281	1.21036	0.989315	1.112	0.897183	NaN	1.0615	1.69136	NaN	1.21751	1.10091	1.0544	1.64604	1.63345	1.19015	1.45054	1.6129
0.856458	1.0853	0.264236	0.952562	0.801154	0.798212	0.522767	0.33184	0.633513	NaN	2.94525	1.12339	0.450958	1.07791	0.554939	0.688563	1.31864	0.935191	0.844309	0.783638	2.68348	2.12463	0.837802	0.427277	NaN	1.37255	2.22881	1.10265	NaN	1.09007	0.921404	1.73542	0.606061	2.92475	0.742611	NaN	1.00071	NaN	1.4655	1.15461	1.0742	NaN	0.251908	2.86098	1.49786	0.991867	1.07828	1.24653	2.69527	0.804182
0.769941	NaN	23.5677	1.47093	0.921319	0.65937	NaN	NaN	0.557662	1.17051	0.630159	0.611434	0.703037	0.319438	0.79783	0.764059	0.987849	0.503246	1.18554	0.871764	0.502892	0.417798	0.234022	0.619502	NaN	0.632951	0.832224	0.52615	0.595274	0.528961	0.92584	0.378415	0.408714	2.62233	0.490244	0.383951	0.300129	0.2772	NaN	0.258552	0.523259	0.389105	0.551146	1.9822	0.737191	0.556545	0.579542	0.575341	0.27392	0.464037
NaN	0.485295	0.639264	0.79321	0.808931	0.500275	0.572672	0.613234	0.463886	0.501077	0.632711	0.652103	0.510282	0.444227	0.835073	0.672948	0.569638	NaN	0.723066	0.49581	0.928678	0.622859	0.555247	0.367674	0.420734	0.503322	0.355492	0.494218	0.718856	1.20425	0.567827	0.407614	0.553434	0.65634	0.4998	NaN	0.271341	0.492199	0.449055	NaN	0.498505	NaN	0.591086	0.433708	0.452018	0.428357	0.628101	0.408981	0.465723	0.493389
0.324781	NaN	0.517063	0.445058	0.375488	0.462257	NaN	1.55596	NaN	0.182405	0.367823	0.40945	0.326158	0.360062	0.573395	0.613121	NaN	0.533846	0.537952	0.576502	0.339709	0.370879	1.75577	NaN	0.274191	0.300978	0.73692	0.556112	0.308005	1.31615	0.441813	0.423693	0.342842	0.566444	0.598158	0.592452	2.20946	0.778513	0.30909	1.62639	1.51169	0.36708	1.45043	0.232867	1.29692	0.650364	1.21479	1.30093	0.949577	0.554539
1.81703	2.49476	1.54457	0.873286	2.10775	2.92039	2.20731	2.64361	NaN	1.58935	1.91336	1.62636	1.12082	NaN	1.30078	1.49416	2.38056	1.28891	1.0819	0.923361	1.63074	5.75573	2.89159	2.05567	2.69157	2.41045	1.81551	1.92023	1.03936	1.73693	2.03364	2.20347	2.78707	2.79135	NaN	NaN	1.79999	2.17746	1.55494	2.11636	2.96657	1.62821	1.70879	2.33579	2.73703	3.27525	2.04324	2.95631	2.76771	2.57533
4.0568	1.22956	NaN	1.20793	1.66675	0.770653	1.56221	1.22366	0.683574	1.45035	1.85011	1.67971	0.928333	0.792079	1.20163	1.47678	1.46862	1.03878	4.15007	1.25172	1.6562	0.995223	0.992359	0.810438	NaN	NaN	0.802053	0.846668	2.00848	1.64685	1.66315	1.31325	1.10318	0.487068	2.63991	0.656858	0.704523	NaN	0.658241	0.685824	1.62122	0.337575	0.69935	0.940999	1.10936	1.09722	0.581835	0.994036	1.12709	0.69979
NaN	0.26629	0.623597	NaN	NaN	0.280363	0.315966	0.474158	0.557538	NaN	0.313952	0.339121	0.552242	0.549571	0.268456	0.433764	0.380271	0.60957	0.222207	0.325553	NaN	0.35292	0.607681	0.53674	0.905961	0.294092	0.402188	0.484004	0.203099	0.669254	0.64612	0.62027	0.431351	0.387552	0.442733	0.2292	1.00796	0.405203	0.23376	0.185735	0.642302	0.342243	0.878966	0.343607	0.632071	0.504236	0.707163	0.723799	0.51573	1.05357
NaN	1.40762	NaN	1.97188	0.974849	0.966464	2.06582	1.72375	1.17966	NaN	1.46054	1.08057	1.47013	1.12997	1.19855	1.27126	1.33213	0.887863	1.54586	1.19008	1.37963	1.02388	2.11024	2.19549	1.80522	0.775976	1.0018	1.47964	0.926526	NaN	1.03725	1.06509	1.28521	1.36191	1.60813	2.57785	1.00384	3.06457	1.91153	1.71095	1.76594	NaN	2.98891	1.54107	1.79045	2.90875	1.73001	2.06101	1.86713	1.08691
NaN	0.795102	NaN	NaN	1.07317	1.5822	1.74957	1.01128	1.45698	0.599988	0.914913	1.28038	NaN	1.27667	1.56539	1.35731	2.06642	NaN	0.415679	1.56243	1.23136	1.48309	2.91715	1.47341	0.868282	1.16771	1.46252	1.24488	0.513769	0.422369	0.826446	1.28979	1.55347	1.90636	1.03142	2.2476	1.08584	2.55089	1.3074	1.29483	2.11372	1.02377	1.2498	1.49127	2.5208	2.23274	2.52029	2.60756	2.4901	1.595
NaN	0.517947	NaN	0.855286	0.657116	0.469351	9.39673	0.446987	NaN	0.92098	0.921999	0.559472	0.303684	0.571821	0.664319	0.385371	0.882457	0.466374	0.774533	0.498778	0.7373	0.462257	0.421461	0.420964	0.43691	NaN	0.415455	0.639304	0.662471	0.407133	0.555278	0.552212	0.692521	0.736431	0.590214	0.681803	0.403437	0.932662	NaN	0.626174	1.00125	0.588963	1.04583	0.604961	0.81248	0.861772	1.06863	0.70373	1.07966	1.06114
NaN	1.75349	1.47578	1.43937	1.08988	1.20786	1.52043	1.50267	1.90582	NaN	1.47085	2.13757	0.870625	2.70512	1.66928	1.20207	1.13528	1.14836	1.71842	1.23074	3.44661	3.52597	2.58458	1.78629	1.19831	1.41078	2.00332	1.23013	1.15839	1.11295	1.2572	NaN	2.62419	2.61329	1.9141	1.09035	1.77503	NaN	1.59139	1.67398	2.21009	NaN	0.477874	1.90393	2.01183	2.3982	1.63023	3.88319	2.918	2.52029
2.66681	1.46209	2.1913	1.70259	1.30303	3.4522	2.25418	3.69617	1.38047	NaN	1.3684	1.14318	1.32663	2.20629	1.53464	1.19099	1.4323	1.41345	NaN	0.969744	3.74953	1.14805	2.6728	2.2413	4.92368	1.69022	3.35132	2.7859	0.690799	NaN	1.3245	3.71678	2.49054	3.16305	NaN	5.14588	1.57831	6.40944	4.06256	2.0377	3.2437	1.07546	5.31237	2.81976	1.01412	NaN	3.79061	3.26456	4.16389	3.73385
0.470278	0.371968	0.53516	NaN	0.148692	0.424502	0.215927	0.393252	0.34031	0.427625	0.357411	0.785916	0.490894	NaN	0.483536	0.310347	0.113475	0.797957	0.362858	0.275149	0.0841538	0.181828	0.940822	0.12784	1.79305	0.258799	0.241523	4.81788	NaN	0.795165	1.29021	0.297522	0.477236	0.495295	0.0817461	15.1007	10.0182	0.559566	0.357398	0.471631	1.03807	0.199629	0.374785	0.874967	2.28305	0.303141	0.816326	2.88251	NaN	0.51488
0.348262	0.328493	0.529437	0.21966	0.235034	0.34709	0.560852	1.12246	0.356939	0.307106	0.374756	0.402091	0.519103	0.421443	NaN	0.326787	0.350484	NaN	NaN	0.164628	0.355594	0.46032	1.2821	0.634598	0.874585	0.400208	0.345232	0.626331	0.323081	0.264873	0.327129	0.447227	0.323614	0.644247	0.520021	0.598229	0.767048	0.927988	0.74129	0.469616	0.49776	0.571592	0.768817	0.348068	0.4302	0.530729	0.516582	0.504872	0.633995	NaN
0.72015	0.72998	0.359583	0.770891	0.491473	0.445414	0.356075	0.895977	0.678058	NaN	0.604303	0.880514	NaN	1.19934	0.182535	0.976658	0.837731	NaN	0.456246	0.797703	0.663394	0.718959	0.854774	1.01281	0.464922	0.864902	0.727855	0.662866	0.500651	0.655179	0.567344	0.614817	0.835701	0.600673	0.931706	NaN	1.09741	0.739645	1.32319	1.13388	0.796559	0.731315	0.293186	1.0075	1.06246	0.913325	1.0333	1.06089	0.748559	0.74638
NaN	0.542241	0.384054	0.316827	0.244039	0.655179	0.427113	0.856311	0.569995	NaN	0.410627	0.390016	0.58572	0.316666	0.532566	0.392542	0.337986	NaN	0.27049	0.296525	0.401848	0.506278	13.5566	0.474563	0.622549	0.240327	0.516983	0.547855	0.404008	0.516449	NaN	0.503322	0.535246	0.399744	0.534416	0.382497	0.397456	0.846668	0.648593	0.501153	0.566091	0.872372	0.460257	0.579139	0.681106	0.912742	0.45958	0.586751	0.726691	0.407647
0.427442	0.616637	0.411286	0.751993	0.581666	0.327097	1.02337	0.649224	0.585343	0.568408	1.14845	0.652528	NaN	NaN	0.756029	0.346404	0.843882	0.546448	0.701853	0.374069	1.01394	0.845523	1.33344	0.780518	0.643252	1.04873	0.901145	1.16861	0.804182	0.258672	0.363517	0.792707	1.0782	1.30645	0.440218	1.02224	NaN	0.883314	0.786102	0.874279	1.18531	0.695797	0.979432	0.847961	1.04667	1.46927	1.33278	1.80031	1.61587	0.869641
0.600456	0.316586	0.526843	0.854263	0.397788	0.406769	0.479432	NaN	0.333867	0.648551	0.32586	0.467727	0.678702	0.32307	0.652955	0.839913	0.398454	0.35979	0.561388	0.332513	0.748447	0.21925	NaN	0.428412	NaN	0.388561	0.664894	NaN	0.312676	0.44841	0.818733	0.427131	0.332579	0.360815	0.335818	0.290808	0.23805	0.290495	0.398724	0.279767	0.333145	0.270746	0.603027	0.197707	0.277816	0.293143	0.565515	0.351791	0.260423	0.350336
NaN	NaN	NaN	1.20192	0.974659	0.352995	0.721761	0.654322	0.707965	1.19759	1.32746	1.11329	1.05153	0.660022	0.985319	1.75429	1.22311	0.804052	1.16488	1.29458	0.975229	0.697983	1.38427	0.910084	0.419921	0.779727	1.10817	1.60067	0.931099	0.760572	1.17841	1.23874	1.01619	0.917852	0.740412	0.290808	NaN	0.687994	0.766871	0.508725	0.777544	0.375742	0.574977	0.8047	0.912076	0.734646	0.780092	0.819538	0.899442	0.78125
1.11746	1.99005	2.58592	1.05838	0.917515	1.66351	1.40164	1.39499	2.8753	1.17709	0.887312	1.40688	1.16967	1.40521	1.42076	1.12713	1.57188	1.95791	0.533163	1.3772	1.27091	2.21058	1.35582	2.53781	2.99007	NaN	1.37677	1.01381	0.664275	1.44613	1.21915	2.11779	1.48295	NaN	3.19112	1.83385	1.74228	1.7925	NaN	NaN	1.02688	2.0028	1.07722	2.70709	2.60423	0.790264	3.08919	1.21209	3.62214	2.60593
0.971629	0.700378	NaN	0.780579	1.0988	0.577467	1.14124	0.476032	0.965344	NaN	1.3926	0.936944	0.576136	0.882768	1.0869	0.704027	0.592312	1.50793	0.91416	0.802439	1.30393	0.904895	1.6079	1.0358	0.967118	1.80209	0.696621	1.09543	1.39714	0.557662	NaN	1.32793	1.18823	1.25965	1.01916	1.53837	0.716486	1.19904	0.619694	0.799233	1.55608	NaN	1.66731	1.19369	1.55911	1.2735	2.90689	1.44626	1.52137	1.16545
3.67661	3.27429	NaN	2.6139	0.418095	1.74548	NaN	5.89866	1.53085	0.360023	1.46	0.714847	2.8116	4.88687	2.12757	1.75414	4.64037	6.60371	0.311197	0.747664	NaN	8.06972	1.08176	5.09191	NaN	2.03219	2.01191	6.92905	1.34344	3.41612	2.86632	4.28872	3.92542	5.63317	10.1874	1.51249	1.13863	2.3695	0.922169	2.13165	4.01445	1.90204	2.86352	8.9222	3.32281	19.2689	3.06513	2.20109	4.29019	7.24743
0.241844	0.328019	0.178145	NaN	0.164096	0.366892	0.162535	0.222529	0.254732	0.296859	0.185856	0.160015	0.229405	0.156752	0.232683	0.185223	0.22556	NaN	0.192285	0.681896	0.119191	NaN	0.567891	0.267788	0.249308	0.602482	0.21186	0.181035	0.125327	0.278482	0.464662	NaN	0.135698	0.192127	0.293668	0.203434	0.117697	0.304155	0.155362	0.198867	0.144609	0.208112	0.185932	0.119632	0.179736	0.14914	0.126382	0.130955	0.213982	0.168152
0.370151	0.411184	NaN	0.819672	0.676315	0.462385	0.264285	0.652614	0.489069	0.47112	0.501832	0.590633	0.663218	0.37919	0.50782	0.690512	0.56494	0.46262	0.599952	0.39398	0.361507	0.227749	0.723327	NaN	0.400304	0.332668	0.60957	0.600962	0.775314	0.469197	0.661726	0.603573	0.355214	0.28271	0.430997	0.275672	0.199203	0.199728	0.342971	0.512295	0.309991	0.29274	0.300228	NaN	0.556514	0.440005	0.419851	0.454256	0.493583	0.462235
0.412763	0.432563	0.697447	0.157803	0.348967	0.210833	0.371802	0.645286	0.452571	NaN	0.539113	0.5997	0.421461	0.475376	0.434141	0.27115	0.39119	NaN	0.48883	0.239659	0.318928	0.583873	1.26435	1.57913	0.302718	0.590075	1.23816	2.18279	0.534588	0.279634	0.369481	0.338558	0.709572	0.940115	0.385847	0.618621	1.40213	1.2326	0.643377	1.38545	1.20096	NaN	0.917095	0.584556	0.726005	1.14712	0.320821	1.60331	0.876347	0.928936
0.838012	0.615764	0.623597	0.780579	1.17608	1.16702	0.59305	0.661201	0.752559	NaN	0.988533	0.973615	0.556576	0.940645	0.888257	0.621736	0.642715	1.15882	1.05289	0.553587	0.916422	NaN	1.01583	0.774293	0.812612	0.664584	0.566091	1.18416	1.04204	0.766577	1.23125	0.952835	0.83668	1.03173	1.08569	4.48793	0.781494	1.22719	0.576037	0.947329	1.08769	NaN	7.07864	1.26054	0.858148	0.702741	2.30856	1.0338	1.66764	1.64935
0.9243	0.769231	0.782167	1.71597	1.13739	1.33908	0.880824	1.28108	0.825968	0.66569	0.533874	1.57858	1.29214	0.87184	NaN	0.532652	1.03688	1.93757	0.862887	1.29776	1.1994	1.16902	1.30536	1.74183	1.78658	0.778271	1.68498	0.693385	0.510256	1.07697	1.44972	1.25606	1.30598	0.941708	1.49358	1.86965	NaN	1.08499	1.37762	1.09031	1.35648	0.462492	1.87347	0.846955	1.65295	1.95019	1.87617	2.39682	1.83043	1.4391
1.2767	0.752955	0.489452	0.476327	0.423048	0.666444	0.793777	1.2624	0.445434	NaN	0.538097	0.45556	0.467771	0.5773	0.422636	1.25791	0.808342	NaN	0.816393	0.213475	0.842531	1.15745	2.55115	0.379968	0.756773	0.106711	0.786225	0.999301	1.27041	0.667824	0.710328	1.78336	0.971629	0.747496	0.765287	0.914077	1.5093	0.827062	0.332403	1.28485	2.37265	NaN	3.82263	0.844167	0.722178	1.06221	2.02175	2.77516	0.959233	1.02665
0.988533	0.484849	0.880359	1.18078	1.07941	1.20246	0.635728	0.695749	1.21255	NaN	2.81057	1.42643	1.70675	1.40635	0.986777	1.11823	0.834098	1.6509	1.31044	0.867303	1.34501	1.84481	2.20395	2.18279	0.622549	0.99453	2.1724	1.83743	0.807298	2.07671	1.11004	1.71919	1.25937	1.68717	1.36769	NaN	0.887784	1.13099	0.877963	1.00363	2.32954	NaN	1.50107	2.28175	2.79853	1.20671	2.98454	2.69215	2.32688	1.65904
1.61272	1.12948	0.955292	0.93188	1.42007	1.07061	1.56182	0.649224	0.965717	1.05934	1.31692	1.38908	0.58997	0.967679	1.3349	0.895015	1.32378	1.65065	0.966744	0.915919	1.85395	1.2053	0.973426	0.933184	0.782473	1.22701	1.13945	1.46563	0.822571	1.03776	NaN	2.18269	1.10691	2.37592	1.24384	NaN	0.811359	NaN	1.50029	1.51547	1.65369	0.559566	0.881757	1.39353	1.38139	1.27761	1.23156	2.19771	1.7307	1.38454
1.00417	0.494022	NaN	0.969556	0.778877	1.10575	1.05829	0.571037	0.798531	1.11046	0.85237	1.03276	1.07097	1.14103	0.873515	1.13153	1.40681	0.649984	1.30818	0.998602	1.16144	0.538155	0.658545	1.24527	0.68653	0.522057	0.652614	0.657722	2.11332	1.07609	1.77076	1.41327	0.904241	0.782656	0.517277	NaN	0.250576	3.63663	0.608198	NaN	0.55991	0.243315	0.721605	0.533561	0.575838	0.380026	0.504464	0.34779	0.69633	0.847099
0.547915	0.338169	0.372301	0.624571	0.784314	0.50388	0.462792	0.447868	0.258271	NaN	0.717978	0.610687	0.427515	0.469175	0.594424	0.914077	0.682594	0.854409	0.291231	0.505127	0.445673	0.541096	0.222663	0.517974	0.330426	0.514086	0.739645	0.668181	0.684838	0.772798	0.815328	0.613234	0.247641	0.523177	0.35158	0.630438	0.554477	0.735727	NaN	0.562082	0.848896	NaN	1.14532	0.793903	0.587717	0.580013	0.7249	0.521349	0.574547	0.676224
1.4379	NaN	0.622665	0.843953	1.62388	1.32041	1.50978	1.1841	1.29059	NaN	1.17517	1.48291	0.67944	0.681896	1.77614	1.019	1.53106	1.53747	0.9176	1.28302	0.808081	1.35929	1.99017	1.21604	1.3865	0.755801	1.80923	1.93293	1.92034	1.37819	1.27822	1.81835	1.7234	1.68839	0.963577	1.37536	1.51662	1.17422	1.5392	1.48869	1.68036	NaN	4.5104	1.63838	2.1624	1.80642	2.51048	0.902935	1.6965	1.25615
0.84868	0.399265	0.73373	0.713318	0.873515	1.68495	0.710985	0.87535	2.20061	NaN	1.23439	1.83174	1.26905	1.66928	1.17745	1.27426	1.88165	1.61282	1.39848	0.928333	0.29522	1.11284	0.51565	1.89714	0.994332	0.481139	0.669031	1.06852	0.821828	1.82942	4.43302	2.57619	1.67678	1.94224	2.21833	0.980584	0.406256	0.820546	NaN	0.799041	1.18315	NaN	0.519373	2.63539	2.60146	0.66024	1.78393	1.02231	3.82088	2.25362
2.7239	2.15434	1.41227	NaN	1.13184	1.25006	2.02376	1.14461	1.82909	NaN	2.25464	1.55398	1.28505	2.50407	1.06146	0.705368	1.51426	1.16015	1.29147	1.83026	3.14327	3.45566	2.25897	3.11643	1.61608	2.78956	2.42512	2.91775	1.39583	0.989903	0.817194	3.52833	2.5057	2.8251	1.69308	1.76703	1.55625	2.08451	1.96858	1.97589	2.9746	NaN	2.78156	2.58632	3.046	2.51718	2.5168	1.76429	2.88126	3.08413
2.32786	14.5474	28.3094	1.75772	1.20709	0.827677	1.37508	2.05153	0.674582	3.1081	5.77834	5.70809	1.54426	3.93066	3.40669	2.2524	0.384689	NaN	3.262	5.75904	2.26413	32.5775	1.08718	1.44781	0.629406	2.30266	5.65036	0.29227	NaN	3.66905	1.0759	1.2089	4.47007	0.780579	4.25931	1.23631	0.727061	1.47314	0.372412	0.664099	0.866776	14.2108	0.736865	0.324149	NaN	1.2462	0.557103	1.94205	0.969274	0.837241
1.28436	1.33462	0.913159	0.972479	1.3047	1.45683	0.884251	1.46244	1.31406	1.07945	1.52525	1.35292	0.876194	1.25892	1.40823	1.00869	1.33138	1.43825	0.90269	1.14859	1.31297	1.19355	1.01379	1.19191	1.317	0.906043	1.03255	1.40021	1.5815	1.34951	1.29961	2.02175	1.28036	1.51185	1.58489	1.39927	0.71772	0.962557	NaN	1.25331	1.31062	NaN	1.92701	1.32485	1.82812	1.36675	NaN	1.35862	1.65989	1.86445
0.938615	1.06397	0.909008	0.859254	0.885504	1.25576	1.35404	0.927644	1.52235	NaN	0.859476	1.03188	0.754091	0.915248	0.901876	0.971534	1.47152	2.03153	0.867453	0.780884	0.831117	1.06364	0.983574	1.14953	1.04559	1.52325	0.847458	0.808865	2.15021	1.44338	0.728757	1.06612	0.927644	1.18889	0.941265	1.23188	NaN	1.24319	1.02411	0.770535	1.25571	NaN	1.3213	2.02102	1.27241	1.11879	1.90982	1.36216	1.32235	1.75654
1.3238	0.974279	0.957946	1.02938	0.767695	NaN	1.40797	0.797321	1.0005	1.29747	0.878272	1.65101	1.10142	1.10159	1.34064	1.891	0.837872	1.83581	1.83254	1.36162	1.83786	1.99386	1.53464	1.27553	0.940999	2.02069	1.51446	2.01074	3.87222	1.19772	0.901713	0.516529	1.07248	0.679163	NaN	1.55096	0.407216	0.894374	1.32188	0.541712	1.80711	NaN	1.11464	0.877963	1.31543	2.6881	1.23752	1.07616	1.28309	0.8047
NaN	0.775134	0.824198	0.872981	1.57672	1.76563	0.409534	0.728491	1.84802	2.0379	1.76844	1.0803	1.57262	1.16554	1.10612	2.00116	1.52579	1.42953	0.773515	1.1747	0.577935	0.828295	0.653424	1.0421	0.438731	0.926956	1.11035	1.59706	2.06437	1.70529	NaN	0.971251	0.859106	0.716076	1.2655	0.481997	0.565195	0.960707	0.316476	0.371361	1.26621	NaN	0.396432	1.52242	1.09143	0.711136	1.18322	0.990295	0.875503	0.851934
0.473979	0.349235	0.286706	0.225403	0.868885	0.341018	1.17268	NaN	0.633312	0.891663	0.55325	0.500676	0.864827	0.523615	0.929973	0.312246	0.410054	0.356684	1.18802	0.578369	1.80914	0.595699	0.242313	0.338914	NaN	0.327536	0.556793	0.267351	0.21868	0.461808	0.666933	0.745935	0.388576	0.469726	0.347246	0.27374	0.290841	NaN	0.273232	0.388063	0.24266	0.471965	0.168294	0.263359	0.520508	0.238624	0.274476	0.232374	0.400593	0.0880282
0.568021	0.503221	0.535475	0.672043	NaN	1.12178	0.560695	0.590947	0.575904	0.856164	1.10966	0.783269	0.594955	4.1307	0.47172	0.903016	0.684182	0.654579	0.468713	0.588097	0.483302	0.802053	NaN	0.683247	0.864902	0.41132	0.859697	0.495368	0.788457	0.878812	0.81813	0.501228	0.669703	0.650237	0.530983	0.366757	NaN	0.435863	0.496524	0.520969	0.661551	0.308128	4.13223	0.66011	0.594142	0.459052	0.707214	0.3885	0.41978	0.575506
0.735024	0.678242	0.678887	0.48384	0.422887	0.766342	1.19076	0.983768	0.217931	0.326147	0.786968	0.365217	0.473911	0.396212	1.23873	1.10396	0.810964	0.784806	0.946611	0.539811	0.652614	1.02144	0.976086	0.803859	0.401284	0.702691	0.563507	0.855652	0.563507	1.2512	1.18398	0.616067	NaN	0.366046	0.851209	1.54154	1.32137	NaN	0.330578	0.866476	1.44381	1.06126	3.93097	0.692713	0.875197	0.986777	1.05243	1.10081	1.28564	0.632871
1.15034	1.50661	1.35733	1.31069	1.05496	1.12647	1.8404	1.77923	1.37161	1.38129	1.39811	1.73184	0.891663	1.53631	NaN	0.87405	1.21834	1.45788	1.31832	0.841893	1.21446	0.981643	2.58987	1.41006	1.49421	0.3314	1.32314	1.95752	1.1636	0.901469	0.810241	1.64387	1.47556	1.55072	0.959785	1.22021	2.24376	2.71968	1.77406	2.27293	1.99156	1.7316	1.44663	NaN	2.61233	1.94439	1.2528	2.60301	2.18751	1.96229
2.84471	2.19549	1.95019	2.52966	2.44624	2.248	1.19586	2.55024	2.35416	NaN	2.19169	4.42009	2.35178	4.42243	2.38977	1.14381	2.16967	1.30387	1.13767	2.21793	2.95683	2.65851	4.44287	1.20097	3.06391	2.98793	1.98843	3.06354	1.66005	2.67108	2.17799	3.03665	1.65514	3.76932	3.35345	1.22069	1.92145	4.92538	1.64802	2.8439	3.32204	NaN	3.89408	6.13648	2.44475	2.73172	3.52063	3.07446	4.13531	3.06523
2.50181	2.01126	2.1913	2.06573	4.62022	4.11896	2.35555	1.56194	7.64175	NaN	2.61335	4.13257	1.94141	3.53607	3.13018	1.47195	2.68413	5.37317	1.50304	1.87614	2.30856	9.87557	1.94715	4.09383	4.02804	3.15139	2.20965	2.41967	1.36149	2.39109	2.8687	9.51656	6.87711	7.09874	11.2278	5.07614	1.47883	2.9941	1.96943	1.5607	2.24861	NaN	0.97972	10.8278	10.2621	2.84131	7.73694	4.31351	19.492	5.28039
0.679625	0.423496	0.486476	0.926441	0.628575	0.961169	0.568279	0.319244	0.321895	0.710682	0.515863	0.527482	0.499975	1.57364	0.529325	1.01373	0.568311	0.599988	0.516476	0.488329	0.548426	0.367688	0.307069	0.518538	0.185233	0.400946	0.544277	0.577634	0.664584	0.61267	0.667646	0.434179	0.339052	0.595096	0.316937	0.17239	0.300228	0.380286	0.383671	0.31412	0.315896	NaN	0.233623	0.769349	NaN	0.439097	0.513452	0.393809	0.458568	0.614817
NaN	1.32524	1.28543	1.63994	4.51834	1.83591	2.71746	1.26441	4.92635	1.32041	NaN	3.41285	0.846812	2.34968	3.0315	0.87184	2.92398	5.91541	1.14061	1.85371	1.84884	5.11012	1.6763	5.97372	4.64145	2.71003	2.63407	1.32382	1.46122	2.34571	1.27672	4.77168	5.38184	3.23897	4.87258	4.35711	1.10563	4.11201	1.58203	1.95031	3.66932	1.19063	1.94261	6.65602	6.41026	2.54252	5.2263	4.19903	12.2269	8.1057
0.837591	1.21929	1.22446	0.788519	1.17863	0.986777	1.49138	1.39103	0.921404	0.496007	0.806582	0.606097	0.554847	0.963948	1.24687	1.25367	0.670601	1.0925	0.674673	1.10396	0.48998	1.07356	1.3084	1.01208	0.322186	NaN	1.08374	0.933445	0.701951	1.77907	1.14483	0.918949	0.589032	0.850413	1.24462	2.95255	1.98629	1.44467	NaN	1.02574	0.900576	3.97947	16.7833	2.45616	0.519292	2.56568	2.03915	1.16441	0.807428	1.10574
0.417536	0.171568	0.467465	0.28196	0.165516	0.565643	0.280285	0.216769	0.307399	0.263352	0.237727	0.139421	0.262985	0.428302	0.154154	0.181159	0.194145	0.306288	0.410576	NaN	0.318228	0.239561	10.4108	0.390885	0.331521	0.299661	0.145713	0.616523	0.369113	0.413462	0.23076	0.0857412	0.445871	0.148949	0.259067	0.702395	0.67861	1.42118	NaN	0.80064	0.635284	0.415679	0.982801	0.510048	0.236127	1.63999	0.291886	1.50301	1.67912	0.372606
1.24623	0.906208	1.02836	0.658415	1.14214	3.02874	0.805023	0.961538	0.930146	1.15209	1.53412	1.29184	1.36214	1.29722	1.86199	2.24195	1.19477	2.04771	0.822098	1.92898	1.23364	1.62274	0.944198	1.01924	0.865052	0.776096	0.920725	0.740905	1.45641	1.49156	2.29363	2.12152	0.785855	0.844595	1.01068	0.30087	0.402544	0.809127	0.920048	0.468801	0.82203	NaN	0.81626	0.978761	0.832847	0.776156	1.08627	0.79321	1.23451	1.05818
1.74917	1.70425	1.25357	2.16807	1.29687	1.90763	1.73076	1.96994	1.46178	0.667289	1.45626	1.38733	1.49557	1.95687	1.40875	1.33831	1.72921	2.62274	2.03103	1.03224	1.13204	1.77314	2.12988	1.87406	1.96564	1.91007	1.57955	3.33411	1.53419	2.09	1.24409	2.42913	1.93222	2.36384	1.86682	1.33284	1.71565	NaN	2.02671	2.18842	2.25831	NaN	1.17233	2.52143	1.76289	2.73973	1.56279	2.40062	2.23899	2.04248
1.75061	2.39034	2.00228	1.79575	2.99886	1.69794	1.59413	1.75085	1.93723	0.890869	1.44061	2.03712	1.60033	1.79982	1.90324	2.28472	2.26578	2.32547	1.76311	1.09855	2.67852	2.51395	1.8381	2.21976	1.79192	1.90465	2.07473	1.55092	1.82849	1.50096	1.70718	1.71019	2.2998	3.27022	2.24931	2.28347	1.37259	2.49981	0.50388	NaN	2.44583	NaN	3.30491	2.50231	2.16516	2.50759	2.49035	2.17571	2.77708	3.10039
0.574713	0.751767	0.951294	NaN	0.717206	0.622781	0.914244	1.08112	0.463027	NaN	0.617932	0.646371	0.943752	0.638937	0.892937	0.947149	0.495001	0.71058	0.74096	0.621504	0.520508	0.475964	1.83726	0.622278	0.496032	0.555864	0.516823	1.79231	0.609384	0.627707	0.88098	0.500751	0.675265	1.08109	0.516449	1.16249	0.770416	0.663878	0.68937	0.810635	1.04371	0.384867	1.87413	1.03663	0.996512	1.16226	1.38171	2.29405	0.798658	1.3308
24.3067	30.5008	19.6847	26.0892	11.9158	25.6463	3.91405	3.84423	10.4582	10.3988	40.7997	15.5737	53.2538	7.25058	67.1096	61.6561	8.01025	22.1415	20.2126	39.763	0.765404	17.7491	5.2924	5.43715	2.51921	6.9142	11.1908	2.57017	6.26763	37.8387	33.9766	21.938	30.4488	8.86839	31.7783	2.39389	1.1004	2.89872	2.5744	1.17561	10.7098	1.2588	NaN	2.53878	1.04	3.64551	8.62962	2.11019	2.66916	NaN
2.54816	2.25856	2.31193	1.53941	2.01382	1.48096	2.42014	1.50793	2.6455	NaN	1.61426	1.87178	2.77955	2.40136	1.57696	1.45851	3.53694	2.39034	2.51807	1.88466	3.71802	5.00576	2.52461	1.94723	2.38192	2.05116	2.51959	3.31268	2.92697	1.33207	1.50421	3.01677	2.19742	2.90816	3.7103	6.4704	2.19178	4.15835	3.07654	2.66276	3.26349	1.67112	4.98554	2.40714	3.59738	4.45295	3.204	2.51718	4.55539	1.30931
0.840336	0.287191	0.544484	0.577801	1.43023	0.805932	0.762428	0.661332	0.487282	NaN	0.946701	0.492247	0.782963	0.660895	0.950209	0.956846	0.875044	0.741125	1.00877	1.19241	0.685495	0.459158	0.393283	0.368067	0.72998	0.552883	1.43989	0.418445	1.45258	1.06312	1.25622	0.653168	0.654965	0.554693	0.518968	0.285404	0.569898	NaN	0.253704	0.155783	0.433802	1.21862	0.516236	0.445375	0.560632	0.376237	0.732654	0.378143	0.395852	0.498778
0.960615	0.75706	0.449236	0.895977	1.02901	0.514721	0.887548	0.694541	1.35788	1.40418	1.02841	1.01157	0.821355	0.496302	0.982608	0.977422	1.20539	0.998802	0.859623	0.913576	1.12627	0.651211	0.424628	0.789204	0.747608	0.463585	1.07912	NaN	1.78117	0.576601	1.24583	0.959969	0.632751	0.622742	0.713521	0.469506	0.692953	0.762428	0.798212	0.60757	0.518726	0.32759	1.02448	0.689513	0.830082	0.689227	0.820614	0.729607	0.902853	1.05887
257.48	125.086	209.63	112.619	151.628	205.103	NaN	959.601	49.6648	52.6843	85.6751	144.427	65.2656	471.12	174.371	125.362	5.47076	95.0028	8.50123	138.272	68.7994	254.829	99.8004	204.855	632.471	22.703	73.5727	783.208	15.7826	350.791	179.543	430.812	197.134	114.991	221.73	312.266	387.822	362.424	20.0505	195.825	170.999	574.383	43.4726	492.077	235.123	30.447	39.6087	321.388	500.45	233.973
0.47934	0.573033	0.336474	1.29813	0.332701	0.5291	0.336021	0.710985	0.34174	0.333923	0.889126	0.460851	0.845738	0.431127	0.689513	0.832639	0.723327	0.59004	0.675174	0.710177	0.663922	0.58418	0.434575	0.528821	0.847027	0.476122	0.46729	0.564175	0.462513	0.667111	0.590807	0.65634	0.376053	0.466657	0.512426	0.35466	0.336508	0.42757	0.738989	0.218236	0.430478	0.485508	0.252921	0.51488	0.343206	NaN	0.450288	0.276358	NaN	0.406868
0.804052	1.30758	1.52809	1.90734	1.11122	1.16678	0.730353	NaN	1.12383	0.823249	1.61423	1.98322	2.10966	1.91953	1.03357	2.30622	1.13873	1.70713	1.29209	1.85099	0.317531	1.91677	1.0584	1.50544	0.689417	0.775494	1.08183	1.9273	1.55659	1.15429	1.24114	0.780092	1.46981	0.964972	1.31397	1.21754	0.45296	0.973426	1.63042	0.791014	1.10387	1.06265	NaN	0.692857	1.77541	0.912326	0.824946	1.55671	0.764117	0.87974
1.07425	1.2498	1.20028	1.83766	NaN	2.08234	1.56301	3.372	1.60676	0.718494	1.33584	1.30902	1.34235	2.2311	1.12386	1.34533	1.80584	1.90843	1.13016	1.06647	1.56517	2.1498	2.05217	2.29743	4.05811	1.43881	1.60984	1.84369	0.769527	1.03141	1.98673	3.14772	2.1901	2.75149	1.51683	1.85213	0.831808	NaN	0.208947	1.34544	1.657	1.57433	1.32303	2.68608	3.2329	3.38673	2.32612	2.44475	2.98143	2.90377
1.30044	1.13362	1.21162	1.59829	1.70065	1.32046	0.896459	0.627235	1.06193	1.0017	0.856384	0.890313	0.944644	0.693577	1.15808	1.56109	0.945537	0.641437	1.11542	1.0208	0.946701	0.639427	0.335604	0.843668	0.818063	0.663878	1.09831	0.616637	0.780092	0.972006	0.946432	0.918527	0.732118	0.77997	0.550418	0.643294	0.327794	0.432563	0.970026	0.631433	0.529072	NaN	0.975039	0.937822	0.67659	0.628931	1.23732	0.75815	0.456579	1.13945
1.42306	2.33258	0.606907	1.15588	4.68011	1.2311	0.816127	0.846239	2.05263	0.714592	2.35217	1.90454	NaN	1.56543	2.16596	1.44686	2.0113	1.66561	1.1237	2.13434	1.59714	2.44606	2.40356	2.1439	2.63776	3.47464	4.69418	1.80232	1.36919	2.01029	3.36734	2.25063	2.08312	0.792456	3.18939	3.17793	1.5587	4.00304	2.52666	1.18011	2.1684	1.33228	3.47959	2.69346	1.96005	2.38265	3.94509	2.39825	5.67505	2.91588
0.993641	0.801539	0.691467	0.952562	1.25273	0.797448	1.00008	0.861401	0.748559	1.19594	1.12506	0.947598	0.663174	0.775074	0.903914	1.66611	0.799488	1.41273	0.958773	0.984349	1.09977	0.682175	0.863856	0.736648	0.788457	0.887705	0.78734	0.994431	0.900495	0.973331	0.820277	0.846884	0.889521	0.920895	0.671321	0.537115	0.571102	0.569217	0.668226	0.785361	0.8726	0.402982	1.00833	0.760745	0.851571	0.993542	0.800192	0.787402	NaN	0.647878
0.264012	0.385594	0.137703	0.235067	0.16193	0.289981	0.264739	0.133602	0.452141	0.451549	0.610352	0.490461	0.0900009	0.382658	0.0680735	0.313991	0.738607	0.101206	0.363478	0.310694	0.259808	0.207284	0.626174	1.08648	0.107797	0.142049	0.423765	0.455311	0.337166	0.388425	0.229875	0.119119	0.950932	0.616333	0.525845	NaN	0.924898	0.897183	0.150446	0.410846	0.750582	0.686106	0.064914	0.622161	1.08367	0.583839	0.687333	0.651721	0.5712	0.268687
0.788955	0.409635	NaN	0.96609	0.887626	0.513426	0.41389	0.674764	0.401784	0.336338	0.837521	0.993542	0.696185	0.31407	0.890234	1.20259	1.54744	0.703433	0.903098	0.767754	0.841609	0.658805	0.573921	0.419551	0.385163	0.417206	0.495909	0.616827	1.30803	0.603464	1.19781	0.913409	0.450999	0.401187	0.631194	0.475896	0.165904	0.451182	0.621581	0.308947	0.519535	0.443262	0.621581	0.493998	0.480307	0.240558	0.276778	0.387147	0.330295	0.555648
1.41317	1.79672	0.84246	0.794786	1.7641	0.894534	1.10453	0.983671	1.64209	1.05651	1.37971	2.44606	0.699203	1.62912	1.45328	1.40193	1.64244	0.945627	0.832501	0.915499	1.20181	1.61046	7.27961	1.79947	0.959141	2.19447	1.77004	2.07314	1.7846	1.06245	0.686955	1.66118	1.05002	1.28977	0.757576	3.44187	1.05234	3.27826	3.12617	2.25545	2.17889	NaN	6.71908	4.25767	2.2415	1.92345	3.30863	2.94135	2.95255	2.35605
NaN	0.390808	0.588997	1.17266	0.76693	1.07838	0.960615	0.801989	0.492854	0.554477	0.898796	0.956755	0.972952	0.828295	1.9782	1.78196	0.879972	0.888652	1.14571	0.83668	0.65083	0.684556	0.803407	0.889363	0.882068	1.02102	0.871688	0.832085	0.695072	2.53865	3.05689	0.854044	0.82021	0.576269	0.598122	0.524191	0.542888	0.73828	1.13053	0.475511	0.734808	0.685354	0.633673	0.687805	0.875427	0.821963	0.849907	0.407847	0.491207	0.463435
0.789079	0.924556	0.496007	0.797703	0.702001	0.874585	0.493852	1.24705	0.488424	0.415179	0.703581	0.8088	0.877963	0.90269	1.36928	0.870474	1.8195	0.675493	0.769882	1.60287	1.18315	0.521676	0.680457	0.562968	0.745212	0.824198	0.726269	0.823791	0.8088	0.901469	1.82169	0.75523	0.681013	0.591331	NaN	0.402091	0.678058	0.621272	0.525707	0.31508	0.550782	0.40085	0.91191	0.507743	0.462321	0.61237	1.00353	0.552731	0.642261	1.01454
NaN	0.659674	0.478675	0.704622	2.93169	1.42631	0.807298	0.869187	0.912492	2.98329	0.716538	1.02916	1.65637	1.30222	1.00684	0.684088	1.26215	0.819941	0.835143	0.997606	0.7494	1.24866	0.659109	1.40131	0.461382	0.808669	0.65647	0.726375	0.749794	0.92302	0.917852	0.726903	0.827677	0.852297	0.949307	1.7104	0.772022	2.2009	1.3028	1.13512	1.15437	0.811886	3.16036	1.18905	1.23045	1.57205	1.43431	1.15226	0.900982	0.943931
0.888336	1.21829	0.877655	0.780153	1.23215	0.644496	1.21631	0.844951	1.13017	1.07341	0.945716	1.10876	NaN	1.02375	0.930839	1.2508	0.825219	1.63143	0.704771	0.866476	1.03233	1.51252	1.30984	1.10396	1.02233	1.26727	0.88433	1.29072	0.872296	0.490148	0.676682	1.28657	1.14542	1.34742	1.20954	1.44705	0.678196	0.932662	0.847961	1.49519	1.54634	1.11894	1.75432	0.958497	1.50292	1.39235	1.13735	1.5532	1.98393	1.73136
0.296595	0.21093	0.199633	0.176326	0.242043	0.0726322	0.197527	0.233596	0.1926	NaN	0.181746	0.114441	0.153889	0.278125	0.295238	0.132284	0.146359	0.165038	0.215239	0.20057	0.502311	0.218136	0.359054	0.271466	0.263734	0.394462	0.117144	0.23131	0.192801	0.0607497	0.212409	0.366878	0.245664	0.538184	0.198515	0.144194	0.289302	0.233247	0.239774	0.312217	0.431686	0.416441	0.173166	0.202212	0.236116	0.222797	0.233307	0.330732	0.541096	0.368636
0.501203	0.740576	0.407897	0.373734	0.767872	0.435104	0.450918	0.713063	0.594001	0.414079	0.379248	0.402431	0.252678	NaN	0.847745	0.775314	0.606833	0.397788	0.298847	0.443086	0.539782	0.464835	1.62098	1.12784	0.474541	0.885269	0.60024	1.17851	2.0677	0.512715	0.513242	0.598552	0.273688	0.39093	0.459749	1.27214	0.61931	0.663042	1.25227	0.679394	1.20409	0.43482	1.67308	1.21086	0.838434	1.02017	1.67163	0.799936	0.969744	1.26135
1.02644	0.480584	0.700035	0.701459	1.34499	0.859254	0.765404	0.788955	0.841184	1.21197	1.03464	1.05564	0.824402	0.670017	1.15091	0.907606	0.905797	0.954745	1.1335	0.75643	0.804764	0.924898	0.716589	0.860807	0.48216	0.898392	0.783208	0.766401	1.57161	0.859033	0.986583	0.888652	0.642261	0.601178	0.738716	0.518861	0.762021	NaN	0.707915	0.681803	0.834376	0.296042	0.744935	0.759071	0.930925	1.01506	0.867303	0.751089	0.72124	0.989805
1.6314	1.65577	1.41115	1.11541	1.24778	1.92942	1.75614	1.59454	2.28014	NaN	1.01981	0.782411	0.903669	2.30665	1.18924	1.34746	1.41098	2.00076	0.894374	1.06419	0.861178	2.14615	1.93446	2.50332	3.63451	2.12676	1.4766	1.92075	1.02869	1.06129	0.920302	1.9216	2.13056	2.18579	3.00517	1.7681	1.20818	2.25836	1.07257	1.29542	1.77825	1.66442	1.64031	3.13804	3.76265	2.0787	2.26219	2.23599	3.5886	2.57327
0.107168	0.128603	0.235217	0.212175	0.127424	0.156949	0.153313	0.141066	0.157003	0.136032	0.23042	0.140154	0.172965	0.133849	0.0903098	0.467224	0.233274	0.142629	0.153078	0.223334	0.181222	0.101838	0.168631	0.334258	0.169863	0.148465	0.29385	0.227733	0.162509	0.114536	0.186923	0.160033	0.22142	0.217103	0.346021	0.0824946	0.259215	0.248466	0.173545	0.0909008	0.217424	NaN	0.23042	0.226173	0.465181	0.173403	0.263657	0.165429	0.221317	0.802633
0.420115	1.60377	0.522767	0.758553	0.83696	0.108817	0.586407	0.793021	1.27288	NaN	0.879817	1.41533	0.68918	0.373107	0.27046	2.05052	1.04106	0.600709	0.893575	2.027	0.437598	1.70917	1.4619	0.889601	0.508466	3.93546	1.38324	1.89097	2.39946	0.716127	1.05709	1.213	0.371885	0.659457	1.04858	2.77994	1.62861	1.80427	3.52473	0.680504	15.5705	0.412371	18.2203	6.8653	1.05467	2.29174	0.544188	2.29079	2.42966	1.91366
0.726533	0.22748	0.249445	0.371595	1.11445	0.628338	0.726533	0.592557	0.493778	0.746213	0.743771	0.756372	0.711642	0.416441	0.894294	0.478881	0.7122	0.56654	0.838223	0.690799	0.824402	0.654365	0.335875	0.484191	0.344911	0.422708	0.437963	0.722074	0.711389	0.724848	1.10428	0.520888	0.567086	0.664143	0.40269	0.260573	0.470633	0.388199	0.358282	0.309186	0.494193	NaN	0.46594	0.592382	0.40422	0.373232	0.630835	0.57435	0.492174	0.444701
1.07743	2.6753	0.531915	0.408297	NaN	0.775555	1.21548	0.921914	1.19022	0.411184	1.30601	1.54473	3.44851	1.11929	2.23674	1.00205	0.990688	0.408063	0.614817	0.678196	0.894775	1.83066	1.52725	1.82186	0.725742	2.40836	0.949487	1.80512	2.73037	1.34212	3.0238	2.01402	1.47419	1.28693	2.13124	2.05816	0.567151	1.32256	1.48124	0.780762	1.06701	0.688184	3.70096	2.87687	2.07512	0.422226	2.85878	2.51155	1.6997	2.25739
1.75147	1.32024	1.70398	1.05225	1.12923	0.773994	2.12179	0.733891	1.97107	NaN	1.35584	1.38236	1.67297	1.81703	0.538764	0.510386	0.418743	0.331268	1.8109	0.989413	1.2939	1.48034	4.61127	1.36821	0.520346	0.755401	0.486855	1.6086	0.456809	0.623636	0.826925	0.903914	5.82683	1.40974	1.10666	1.34495	2.46287	2.04298	1.20367	5.25431	2.59195	1.48549	0.666889	1.0498	2.17259	2.76472	0.635647	4.58064	1.88203	1.49808
1.43338	0.832709	0.465268	0.218837	0.432582	0.327429	1.19459	0.563444	0.749288	NaN	0.613347	0.348772	0.394898	0.980488	0.473889	0.209983	0.331214	0.205103	0.138038	0.115801	0.317531	0.57607	0.498604	0.847314	0.542564	1.49869	0.36515	1.57704	0.25896	0.990491	0.212603	0.905469	1.36154	1.68839	0.417136	0.975895	1.092	0.677231	0.957488	0.753693	1.77945	4.73956	0.120875	0.681803	1.41721	0.421106	0.739754	0.289553	0.506611	0.787898
0.493291	0.236234	NaN	0.551846	0.754945	0.829394	0.281207	0.41561	0.420044	0.419569	0.863558	0.56205	0.62897	1.10506	0.608236	0.664982	0.557383	0.343183	0.675767	0.338146	0.610128	0.51164	0.316416	0.508932	1.55499	0.347681	0.407997	0.699399	0.542682	0.441599	1.05394	0.324202	0.460787	0.361441	0.343195	0.271186	0.46867	0.300111	2.55128	0.259296	0.588166	0.638896	0.239728	0.358012	0.495197	0.327826	0.379305	0.51701	0.340263	0.430385
0.690369	0.808604	0.7414	1.01855	0.763825	0.382	0.7373	0.407797	0.691706	0.953289	1.01903	1.04384	1.25265	0.686201	1.03079	0.829875	0.864304	0.942685	1.07431	0.783515	0.829256	0.7347	0.909504	0.774773	NaN	0.539607	1.02134	1.04318	0.987459	0.552212	0.83675	0.755801	0.674991	1.18395	0.77912	0.631672	0.570613	0.471542	0.921234	0.636375	0.579139	0.350214	0.712149	0.851499	0.672766	0.801218	1.07416	0.66177	0.823113	0.866476
0.711541	0.66269	0.725216	0.585995	0.631513	0.692521	0.262695	0.632151	0.63589	1.02421	0.72427	0.720046	0.977135	0.413069	0.755059	1.38502	0.669658	0.783147	0.754831	0.821693	0.611509	0.421443	0.2337	0.431444	0.410459	0.58126	0.640697	0.706314	0.506047	0.815927	1.13049	0.568569	0.575374	0.508984	0.399792	NaN	0.507924	0.56392	0.733568	0.45296	0.502285	0.518753	0.364232	0.433745	0.475082	0.553925	0.631832	0.499426	0.409216	0.667869
0.648424	0.578804	0.429461	0.696816	0.635082	0.625821	0.693241	0.635405	0.856751	0.706564	0.85492	0.591576	0.83375	0.464878	0.894694	0.754319	0.913743	0.863707	0.706664	0.799169	0.918358	0.574746	0.575175	1.09333	0.511012	0.697156	0.715615	0.903342	1.09561	0.573066	0.939232	0.811227	0.649646	0.667022	0.66269	0.528513	0.282215	0.544129	0.463994	0.548336	0.624727	NaN	0.73692	0.584966	0.740193	0.699839	0.728067	0.520942	0.700967	0.743384
2.50413	1.54574	0.851354	0.796178	3.21699	1.51635	2.32851	1.09531	5.47555	4.95319	3.60373	3.17188	1.18476	4.85225	2.18809	1.29418	3.33045	7.64409	2.08229	1.34011	2.93195	5.75076	2.5234	6.65513	1.39899	4.24322	7.22387	3.05838	2.68868	1.3887	1.95412	4.73462	2.43885	4.78057	6.0746	NaN	1.40792	2.29705	1.56502	5.47315	12.7401	1.29907	1.50946	10.888	9.54836	7.57002	16.0777	6.90369	9.48677	5.44929
2.562	1.3244	5.17357	1.16097	3.24433	1.0405	5.76402	1.7381	0.972195	NaN	2.93625	3.78659	1.13935	1.24606	2.03587	1.57523	3.40681	0.690751	4.67836	0.726216	1.00221	1.66132	14.9528	2.87216	1.27561	4.2294	1.87378	15.6855	2.62833	5.40745	1.15168	1.62994	11.7332	1.51768	1.85021	13.2571	1.57612	9.80873	4.0391	4.19621	6.0412	0.955201	2.77408	4.28578	3.20061	34.1588	4.9249	25.6023	9.69932	4.65571
0.38622	0.280466	0.381388	0.170396	0.270621	0.267594	0.29107	0.483325	0.339478	NaN	0.197941	0.190063	0.281643	0.253017	0.460151	0.300978	0.339501	0.335357	0.366797	0.336882	0.297601	0.407183	0.541301	0.267695	0.214744	0.276656	0.410374	0.333845	0.285413	0.785423	0.554416	0.219149	0.240396	0.286041	0.222678	0.324381	0.499002	0.527176	0.259734	0.368202	0.420115	0.495565	1.5382	0.375813	0.311964	0.31503	0.571755	0.499052	0.316096	0.370508
5.50327	5.4603	4.70566	4.91159	3.10723	4.03633	3.37302	5.67344	5.35705	2.64341	3.65885	4.1724	2.64795	8.66401	2.28639	1.66304	5.72771	2.44004	3.99154	2.79673	4.76872	7.4638	4.51101	6.50491	6.41108	5.11169	6.66489	5.53557	2.04645	2.24553	3.84128	3.00228	7.89702	6.59326	7.9277	3.91896	7.56086	5.78771	2.98329	8.34028	5.78269	4.71631	1.58604	9.61446	8.25628	7.32923	4.12728	6.62296	7.49288	7.69942
1.86199	2.20313	1.63401	2.70629	1.93431	2.18818	2.01163	2.47991	1.76069	1.3876	1.62454	3.35694	1.51941	2.04708	3.05278	1.88597	2.25225	2.74597	1.53018	1.49687	1.9998	2.09692	1.17081	4.26985	0.866176	1.48558	1.06705	1.54844	1.72277	1.0776	1.49202	2.42207	1.70135	1.86279	1.62419	0.965624	1.34036	1.04737	0.682454	1.95111	2.72443	0.927386	3.58025	1.43908	1.17883	1.06782	1.71639	1.30664	1.72005	1.66631
1.22284	1.49936	1.09194	0.925412	1.14173	0.916422	1.33932	1.0328	1.64701	1.26223	1.14067	1.41965	1.17445	1.41531	1.29318	0.989707	1.23019	1.37165	1.02767	1.12843	1.19099	1.6897	1.71748	2.23284	1.75599	2.30293	1.72304	1.33849	0.989315	1.28231	1.42288	1.77727	1.19609	1.74316	1.59325	1.714	0.835352	1.46782	1.81485	1.03006	1.34539	1.24265	1.40136	2.64138	2.02192	1.46171	2.39958	1.66786	1.97656	1.79009
0.409467	0.265168	0.552792	0.333834	0.201829	0.29907	0.376818	0.366596	0.352423	0.236586	0.372537	0.250784	0.168645	0.267845	0.33539	0.617665	0.30459	0.481487	0.326403	0.175525	0.506611	0.540628	0.478836	0.666267	0.430293	0.493803	0.295657	0.626292	0.375418	0.270336	0.384956	0.209806	0.325616	0.323803	0.420433	0.503018	1.14236	0.738989	0.217585	0.609905	1.01384	0.43756	1.04238	0.290512	0.727537	0.575871	1.1822	0.645037	0.565867	0.735186
1.45132	1.2618	1.40115	1.78801	1.61049	1.68121	0.923617	1.20473	1.24527	1.69661	1.38943	1.94814	1.9887	1.83945	1.56106	1.31567	1.31074	1.76063	1.28632	1.75067	1.36232	2.42354	1.73238	1.65967	0.871232	1.54204	1.73853	1.283	1.2569	2.4273	2.34847	2.3672	1.79366	1.93106	2.69644	1.07432	0.899442	2.50539	2.37727	1.12092	1.81245	0.646245	0.828981	2.25632	1.87945	1.76044	3.40275	1.63787	2.59356	2.33781
0.593613	0.548787	0.54136	0.707915	0.519373	0.673174	0.410189	0.841963	0.447387	0.633633	0.524907	0.385089	0.457498	0.545256	0.392835	1.24828	0.611396	0.604193	0.599988	0.607681	0.627943	0.466657	0.407531	0.584453	0.566155	0.279759	0.400657	0.638203	0.49838	0.662208	0.637837	0.394851	0.458674	0.4997	0.378831	0.297212	0.584249	0.507872	0.463521	0.526648	0.471276	0.427095	0.469241	0.393577	0.35859	0.436129	0.445058	0.452468	0.373413	0.599952
1.36282	0.718597	1.30235	1.12061	0.681338	0.959049	0.546627	0.919287	0.903016	0.992457	0.792959	1.26314	1.51717	0.961446	1.85141	1.55015	0.718597	1.89011	1.23136	1.87448	0.897344	0.679348	0.533504	0.681989	0.50551	1.13956	0.957121	0.97229	0.808931	1.91972	1.84843	1.55048	0.510204	0.980104	1.0756	0.451121	0.452366	0.846453	0.699399	0.481719	0.743052	0.394945	0.560005	0.619272	0.74599	0.778392	0.754091	0.641972	0.712251	0.648971
1.70856	1.06348	1.45601	1.17251	1.22639	0.6744	1.09465	0.797067	1.7722	1.36917	1.43008	1.4555	0.775976	2.30213	0.507511	1.19263	1.64401	2.06432	1.0452	0.756716	1.73726	2.0156	3.33367	2.19346	0.890313	1.58755	1.41689	1.13365	0.779849	1.19224	1.05097	3.3024	1.69394	3.20976	2.83318	1.98102	0.377074	3.13913	1.9692	1.36401	1.35307	1.18138	0.699252	1.78715	2.37119	1.83925	2.36323	2.8473	3.06579	1.89552
4.40238	8.87075	4.89884	4.87829	4.34877	6.26959	6.06318	6.74536	8.27267	5.77734	10.0109	12.3106	8.5492	11.9845	5.58909	3.58616	9.42685	3.09856	3.76421	6.79025	12.0853	7.31797	20.3252	6.13685	11.7568	9.91375	5.45822	10.084	3.07664	6.77782	14.4561	17.4122	10.9895	14.663	11.6122	5.58566	7.81494	13.6433	7.11389	11.749	12.4718	10.0088	4.28046	10.083	9.24215	8.08604	5.41418	6.90799	10.042	11.5694
1.25326	0.742721	0.887154	1.17471	0.83633	1.01868	1.00469	1.01687	0.614288	0.915332	0.742556	0.66921	0.641601	0.788395	0.871992	0.956846	0.878657	0.870398	1.03694	1.05574	0.624961	0.692809	0.528402	0.933968	0.813802	0.951656	0.73346	0.608347	0.77997	1.30086	0.752729	0.976276	0.711592	0.849618	0.671231	0.638244	0.757748	0.567859	0.609607	0.714898	0.778574	0.757576	0.572312	0.754091	0.573559	0.632631	0.838997	0.679995	0.600529	0.680411
0.457289	0.542711	0.379939	0.505766	0.420946	0.350939	0.0464059	0.225902	0.414353	0.690417	0.496056	0.715615	0.352013	0.61177	0.242207	0.450369	0.93985	0.324538	0.58326	0.618238	0.538445	0.54277	0.46292	0.697642	0.425098	0.339006	0.772201	0.564398	0.246749	0.400529	0.453906	0.69512	0.536855	0.456392	0.470323	0.552395	0.73692	0.776337	0.595912	0.517732	0.421923	0.596837	0.208039	0.73959	0.887942	0.771486	1.13884	0.707564	0.523451	0.812612
1.95507	2.02155	1.42611	0.948497	1.22169	1.52516	0.982125	1.32806	1.92042	1.00154	2.34423	1.2968	0.845309	1.84159	1.38874	1.02948	1.56732	1.33917	1.75377	0.724113	2.01382	2.71437	2.82678	1.67608	1.90978	1.9566	1.47262	2.82717	2.06851	1.309	2.05698	1.91029	2.15931	1.98389	1.99684	1.28665	2.54414	1.8134	1.34649	2.33122	2.44894	1.56713	1.89548	1.57173	2.52302	1.66825	1.99676	2.10005	2.03878	3.22331
1.67482	1.16734	1.49752	1.70794	1.22128	1.57161	2.04784	1.6153	1.32158	0.8923	1.51073	2.31257	1.51213	1.86043	2.10168	0.82802	1.47003	1.23609	1.54093	0.949307	1.72274	1.19927	1.04533	0.864603	1.12987	1.58572	0.870398	1.05148	1.1104	1.27165	1.25649	1.97625	1.71871	1.46727	1.28075	0.652784	0.755915	0.975515	0.687522	0.847601	1.05579	0.885583	0.796305	1.08526	0.911245	0.753012	0.990589	0.908513	1.18579	1.91461
0.933794	0.621697	0.862143	1.07152	0.883158	0.803277	0.344816	0.5251	0.755801	0.430942	0.554262	0.590528	0.913492	0.941265	0.657592	0.709019	0.597907	0.583669	0.622045	0.87535	0.821693	0.495565	0.463263	0.494682	0.570353	0.718081	0.483162	0.680133	0.566123	1.18827	0.87727	0.553587	0.513822	0.448873	0.582547	0.260783	0.533049	0.601793	0.695555	0.462556	0.518269	0.686342	0.320246	0.497512	0.691133	0.309482	0.546837	0.468691	0.383715	0.562809
0.635001	0.43691	0.541096	0.747943	0.557973	0.589449	0.513373	0.60868	0.368324	0.742115	0.560601	0.641931	0.659979	0.883392	0.835492	1.1048	0.619157	0.638447	0.622045	0.673401	0.685025	0.513215	0.377544	0.381243	0.393949	0.601178	0.594142	0.639509	0.425713	0.688279	0.731261	0.480123	0.388893	0.622549	0.352609	0.45045	0.530842	0.171207	0.515996	0.283254	0.41855	0.62027	0.404645	0.429277	0.356354	0.427753	0.559003	0.427972	0.532311	0.42155
0.746157	0.359389	0.416945	0.676773	0.552639	0.818867	0.356926	0.306984	0.325224	0.732118	0.43352	0.693289	0.656211	0.519265	0.494486	0.830841	0.520237	0.55605	0.587889	0.649688	0.553679	0.397662	0.39604	0.348809	0.355278	0.845595	0.459031	0.638366	0.595274	0.480238	0.88269	0.584932	0.32603	0.491884	0.357488	0.364777	0.27568	0.256786	0.17526	0.223849	0.474901	0.268579	0.402366	0.26656	0.36808	0.496845	0.53559	0.473507	0.41625	0.554232
2.18164	1.67977	1.43726	0.995025	1.23178	0.992162	1.28386	1.30266	1.25194	1.516	1.70439	1.46002	0.70932	1.7284	1.56016	1.3141	1.3664	1.16095	1.17149	1.34895	1.7555	1.3393	1.34389	1.77057	1.02914	1.20057	1.29545	2.17462	1.12406	1.35161	1.06866	1.84356	1.33967	1.82789	2.1222	1.45159	1.358	1.5051	1.40518	2.11833	1.73971	0.945805	1.8162	1.75836	1.74517	1.92485	0.613422	2.03046	2.08668	2.10881
1.27139	0.706265	0.696282	0.558971	0.878426	0.796622	1.71025	1.54288	0.609384	0.322799	0.657289	0.487686	0.51565	0.492417	1.10158	0.770653	0.60868	0.708968	0.66379	0.320123	0.958773	0.568473	6.24766	1.12334	1.79778	1.38382	0.83675	1.71336	0.42107	0.82905	0.478583	0.980392	1.41842	1.06609	0.654793	1.57886	0.947778	2.16385	1.27434	1.34984	1.62359	1.03893	1.17862	1.43993	0.864379	4.30756	1.47643	1.74234	1.79989	1.09419
0.833056	0.74744	0.724638	0.545643	0.64587	0.550812	1.00884	0.783945	0.82447	0.530645	0.665956	0.706115	0.938174	0.813405	1.14296	0.835282	0.621041	0.532964	0.642921	0.552212	0.775134	0.996413	1.73515	1.1628	0.641972	0.859623	0.77997	0.915667	0.549179	0.527927	0.6943	0.848608	0.799488	1.05421	0.856458	0.885504	2.04901	0.716692	0.752785	1.22543	1.43166	0.719011	3.17723	0.821086	0.986777	0.806972	1.12286	1.47833	1.0139	1.00981
0.99226	0.829325	0.530476	0.89214	1.747	0.490292	0.851209	0.672224	0.67331	0.889996	0.877039	0.867453	0.765169	0.692329	0.393701	0.890076	1.29196	0.350349	1.18982	0.696427	1.0846	0.601142	0.538387	0.620925	0.590912	0.514245	0.653808	0.811754	1.05626	0.66011	0.435673	0.604412	0.629327	1.08638	0.493949	0.630557	0.536855	0.742611	0.912659	0.636578	0.514748	0.507485	0.56101	0.510725	0.581869	0.579307	0.420098	0.629287	0.478149	0.534845
3.05829	3.68732	1.8132	0.993542	3.05951	1.66828	2.03095	1.66903	3.21409	1.61044	2.77039	2.58451	1.8919	3.53257	3.31895	1.15492	3.0446	2.73008	0.817795	2.15346	0.867679	5.29465	4.24358	5.41888	3.5727	2.81183	2.3417	3.00012	0.945448	2.42719	1.81762	7.12708	6.054	7.74054	4.21692	3.56913	1.97765	2.70922	2.93118	2.16193	2.61042	2.14064	1.0661	5.70809	7.34808	3.37815	3.8323	4.45633	9.3188	3.95366
0.910996	0.863036	0.688231	1.39101	1.01758	0.578035	0.816793	0.542947	1.121	0.792581	1.25605	0.983768	1.05023	1.02458	1.26159	1.0709	1.00057	1.06259	0.96637	1.04055	1.32617	1.38286	1.04536	1.26326	0.985902	1.06798	1.07857	1.2782	1.1548	1.05927	0.925241	2.0889	1.42229	1.30247	1.343	0.959417	1.04491	0.972195	1.03468	2.13165	1.41221	1.32965	0.673537	1.2104	1.75728	1.58602	1.11089	1.49961	1.86919	1.56092
0.244864	0.4584	0.193005	0.48962	0.225169	0.266916	0.165311	0.473889	0.244379	0.305549	0.454607	0.256753	0.332491	0.321605	0.40992	0.479823	0.36899	0.35297	0.290259	0.346152	0.188072	0.160521	0.342501	0.316086	0.24596	0.226732	0.314693	0.356544	0.373762	0.190465	0.155497	0.199832	0.233623	0.292363	0.272777	0.150516	0.27389	0.286451	0.455809	0.248367	0.288717	0.26944	0.36483	0.270871	0.223579	0.202943	0.276068	0.240854	0.179762	0.320308
0.201381	0.260383	1.28436	0.0532028	0.0621968	0.207637	0.251477	0.19811	0.127551	0.15519	0.201288	0.30791	0.109169	0.227889	0.225068	0.159434	0.557507	0.0868961	0.546299	0.116003	0.192686	0.13367	1.10377	0.581531	0.106923	0.404858	0.0796813	0.46503	0.144173	0.232029	0.301495	0.464274	1.19023	0.295003	0.227066	0.125135	1.15509	0.904977	0.278683	0.970685	0.447928	0.346344	0.0524907	0.257619	0.451875	0.535045	0.239733	1.13335	0.421496	0.192034
1.38339	0.117433	0.209354	0.201678	0.719217	0.370343	0.241464	0.159558	0.200787	0.243427	0.549692	0.933271	0.359157	0.0791077	0.0835701	0.187572	0.851281	0.120504	0.554109	0.0805997	0.248386	0.130227	0.231096	0.444405	0.106504	0.146561	0.119684	0.157637	0.811886	0.0992654	0.212044	0.0609347	0.347596	0.0744435	1.26346	0.0598122	0.165131	0.747608	0.226881	0.178104	0.0994827	0.148403	0.297283	0.0526843	0.117725	0.0625704	0.129069	0.0574482	0.0434047	0.113343
2.26071	1.48041	1.60875	2.33946	1.8899	1.48573	1.70282	1.61917	1.51669	1.18627	1.5214	1.75482	1.63535	1.59304	1.65675	1.69236	1.42651	1.68512	1.55065	1.63977	2.43516	1.80989	1.61358	1.30962	2.28582	2.01605	1.76641	1.81478	1.4074	2.10584	1.554	2.39029	1.72625	2.40194	1.89865	1.58564	1.0477	1.87765	1.7394	2.06467	1.93502	1.39905	1.42001	1.85791	2.57506	2.42695	2.29938	2.35521	2.62971	2.69942
0.621465	0.947149	0.471498	0.126751	0.2002	0.766107	0.965997	0.575407	0.432975	0.990884	0.370096	0.155116	0.190103	0.375841	0.661682	0.324749	0.272695	1.44779	0.230203	0.160015	0.388274	0.400545	0.714388	0.71958	0.76858	1.04363	0.465354	1.02533	0.182405	0.735835	1.15968	0.590877	0.581193	0.473934	0.443518	0.506842	0.800769	0.699545	0.718907	0.657765	0.505817	0.68018	1.46039	0.585001	0.783024	1.16408	0.749344	0.953562	1.42276	0.772738
12.9212	10.076	15.4126	3.71775	41.6736	18.457	7.0492	1.75067	21.8069	47.019	38.6728	27.9712	2.55382	19.9952	4.97413	3.54447	37.2412	27.527	36.9864	2.39693	20.3029	17.0783	25.3762	36.0855	11.2595	11.1005	15.2124	35.7692	14.4431	8.84877	19.5894	27.2487	24.8478	29.5736	29.221	12.6916	43.9252	29.2141	7.9694	68.7332	35.4497	49.7488	1.33551	40.032	49.8654	36.7336	30.0345	70.5418	51.164	18.3793
0.947867	0.48209	2.71039	0.587406	0.709623	0.574053	0.282789	0.474451	0.760514	1.61075	1.10336	1.99884	0.987459	0.620001	2.22677	2.44906	0.537115	0.745657	0.995917	1.5068	1.27742	2.59754	0.255957	0.542064	0.398867	0.341064	0.679256	0.247684	0.306711	1.41006	1.0837	0.80186	1.47962	0.370549	0.931099	0.480769	0.398724	0.27717	0.24616	0.503525	0.455042	0.60757	0.327279	0.421674	0.526288	0.236731	0.224366	0.404433	0.405203	0.44617
0.563412	0.512479	0.3141	0.400689	0.371789	0.363227	0.474113	0.440878	0.54603	0.310723	0.551268	0.332591	0.472746	0.525017	0.547465	0.570907	0.562303	0.561892	0.643625	0.572902	0.497265	0.616257	0.779241	0.709472	0.663218	0.492417	0.779362	0.623364	0.51557	0.441248	0.419393	0.666489	0.666311	0.711693	0.529184	0.349052	0.50045	0.69512	0.252379	0.605107	0.793021	0.624805	0.536567	0.643046	0.761383	0.732654	0.808669	0.561987	0.674309	0.820345
1.6115	0.912326	1.84054	1.27436	1.81921	1.72795	1.3676	1.36659	1.19556	1.1611	1.30502	1.44227	1.37442	1.10184	1.77198	1.61608	1.23022	1.89243	1.28263	1.28282	1.39708	1.57898	1.84641	1.29646	1.10423	0.887154	1.97589	1.46772	0.917852	2.67394	2.01544	1.51662	1.21095	1.8831	1.43086	1.62935	1.83506	1.37828	0.824538	1.73611	2.74326	1.02325	3.25245	1.57171	1.64387	1.61561	2.54033	2.52347	2.14004	1.48344
1.17877	1.49882	1.25677	1.42007	1.14714	1.21243	1.23384	1.34512	1.72942	1.6079	1.31732	1.92189	1.30678	1.7068	1.39107	0.859328	1.34593	1.5804	1.42916	1.4458	1.36979	2.17675	1.58892	2.18828	1.53789	2.18823	1.9181	1.44109	1.19089	1.52777	1.3632	2.03878	1.49338	1.72554	1.99525	1.75196	1.15423	1.5915	2.43427	1.03023	1.68583	1.21991	1.19531	2.67251	2.17604	1.97789	2.8729	1.98228	2.394	2.07969
1.16666	1.46527	0.996214	0.810307	1.01476	0.71664	1.15389	0.857927	1.18792	0.979336	1.43439	1.08569	0.748111	1.40998	1.05963	0.939938	1.14895	1.58521	1.16861	0.759821	1.16473	1.3372	1.31721	1.40796	1.13903	1.17419	0.938615	1.30208	1.18929	0.932314	0.610799	1.40675	1.537	1.30637	1.3002	1.00153	1.5227	1.20863	1.1942	1.39049	1.57038	0.981547	1.02523	1.19313	1.51089	1.78336	1.42195	1.38389	1.4473	1.4663
0.548727	0.584693	0.719994	0.676224	0.549239	1.88019	0.806907	0.596766	0.595061	0.687096	0.617132	0.885583	1.07527	0.821355	2.14179	0.371168	0.457018	1.33234	0.568246	0.673582	0.570776	0.938527	0.685213	1.46227	0.526898	0.688137	0.746659	0.849041	0.594601	1.06208	1.54438	0.811952	0.624766	0.898876	0.629129	0.987849	0.853898	0.951294	0.59848	0.777605	2.11672	0.928247	2.94776	0.696427	0.702346	0.874814	1.51405	1.05349	0.829119	0.857412
0.634961	0.427734	0.236956	0.419516	0.676133	0.379536	0.438078	0.451203	0.561766	0.255578	0.501932	0.644538	0.580889	0.492368	0.784437	0.51792	0.508233	0.709975	0.620964	0.457875	1.27639	0.457101	1.52637	0.931793	0.469197	1.14418	2.88567	1.27377	0.652316	0.510725	0.553373	0.665424	0.631872	0.595132	0.621891	0.531039	0.584249	1.39065	0.519049	0.844595	2.1616	0.514562	0.975991	0.805153	1.02181	1.18124	2.09688	0.925241	1.33103	1.52943
2.67187	3.25288	1.19073	1.66636	4.03421	1.49102	2.35643	1.76357	3.01932	2.3888	5.29493	1.70274	2.09987	2.83479	2.23649	0.571004	3.5302	1.05501	2.91146	0.902853	2.83374	3.13942	4.54091	3.74294	1.85045	2.92295	4.41131	7.72797	2.86369	1.91004	3.30371	3.00066	4.85885	3.11546	3.24623	1.83624	4.43125	2.7811	3.51877	3.67161	4.22476	3.17773	2.51769	3.24855	4.91836	4.81742	2.52908	3.52597	2.96868	2.70219
0.678979	1.40801	0.864827	0.901551	0.399377	0.360477	0.53396	0.643087	0.731208	0.792017	0.642756	0.830565	0.89662	1.23168	0.845237	0.520427	0.558285	0.488711	0.618621	1.60511	0.88098	2.9769	0.523505	0.615612	0.440781	0.866101	0.871916	1.09791	0.448894	0.784191	0.571592	0.668896	0.555864	0.435464	0.701754	0.41978	0.645911	0.52829	0.598337	0.356735	0.642963	0.719891	0.305988	0.486594	0.615158	0.256568	0.513189	0.387867	0.486974	1.09052
1.50886	1.78712	1.36709	1.41235	1.57035	1.51791	1.09401	1.51254	1.57881	1.31688	1.28013	1.63792	1.56301	1.83763	1.27753	1.01345	1.24182	1.61645	1.16398	1.4323	1.33517	2.31605	2.25073	1.91007	2.11327	2.17061	1.66185	1.56267	1.31278	1.12435	1.41659	1.59854	1.37217	1.72568	1.98772	2.16155	1.16757	1.68418	2.44774	1.42015	1.58265	1.5488	2.30287	2.5535	2.28718	1.90183	2.63915	1.75328	2.31118	1.93851
0.913576	1.1348	0.760977	0.675083	0.780579	1.061	0.589171	0.606391	1.1729	1.06437	1.57642	0.801539	1.08375	1.55919	0.816593	0.773754	0.952925	0.731261	0.875197	0.7414	1.23232	1.35411	1.20226	1.52975	1.02083	1.26208	0.942063	1.56996	0.639672	0.634276	1.22534	1.26306	1.78498	1.25225	1.71691	0.618582	2.38703	1.19674	1.13161	1.70788	1.46428	1.04758	0.577034	1.14193	1.48098	1.39192	1.01035	1.22731	1.21939	1.25647
1.61896	1.52451	1.37088	0.808211	0.8371	0.440762	1.97558	0.480307	1.49979	0.804311	1.22596	1.25694	0.850629	2.38351	0.632671	0.702149	0.684182	0.553894	1.68461	0.822165	0.785731	1.63305	4.13138	1.91292	0.514589	1.02181	0.820277	1.77314	0.465073	0.740467	0.95648	1.20483	4.38577	0.896941	1.19147	1.0126	2.95499	2.5896	1.53674	4.09232	2.24286	1.42796	0.600745	1.14347	1.60485	2.64599	0.854482	3.92912	1.79624	1.26307
0.609868	0.769231	0.773216	0.6027	0.922424	0.957671	0.922594	1.03339	0.953925	0.311837	1.42908	0.82713	0.577501	0.660982	0.977517	0.805737	1.05472	0.940911	0.754603	0.867002	0.708015	0.748391	0.83647	0.713827	0.632751	0.656513	0.773694	0.822165	0.53359	0.813074	0.539432	0.640738	0.537577	0.61237	0.575639	0.465376	0.607091	0.747664	0.693001	0.599197	0.686719	0.589449	0.947867	0.647249	0.826515	0.614779	0.612145	0.808277	0.97012	0.761441
0.806127	0.997904	1.00428	1.33924	1.06809	1.34933	1.08384	1.04476	1.07165	1.02463	2.06941	1.08791	1.25274	0.977517	0.98464	1.8557	1.3223	1.62383	1.17651	1.52541	1.1333	0.965158	0.779849	0.846955	0.894855	0.912492	0.954927	1.16046	1.67487	0.935541	1.49105	1.00203	0.928764	1.01418	1.04248	0.650787	0.710782	0.747217	1.03238	0.770357	0.730247	0.771605	1.15421	1.07328	0.993443	1.16484	1.02967	0.791703	0.895897	1.16501
1.07356	1.2663	0.867528	1.09135	1.40796	1.41953	1.27286	0.937295	1.68566	0.933707	1.07492	1.27371	0.861772	1.94875	0.928764	0.738661	1.04812	1.42458	0.80457	1.01697	0.697739	1.62543	1.84213	1.56031	1.59627	1.44465	1.3653	1.05204	0.903098	0.757518	1.32408	1.92548	1.638	1.42252	1.41263	1.71792	0.947059	1.50841	1.4186	1.00161	1.29749	1.01675	1.52884	2.15713	2.43908	1.16078	2.60281	1.05602	2.56456	1.85804
0.497859	0.305157	0.418743	0.446987	0.109111	0.855652	0.236608	0.721553	0.381636	0.386683	0.357859	0.225667	0.388274	0.406108	0.357987	0.650576	0.637105	0.371168	0.508621	0.499102	0.200606	0.239561	0.26723	0.222588	0.572475	0.122134	0.278948	0.199708	0.251433	0.530588	0.806712	0.283897	0.434443	0.265527	0.295151	0.0727484	0.341413	0.21937	0.225048	0.168353	0.207818	0.381548	0.243149	0.150498	0.160901	0.0884408	0.170448	0.149595	0.13429	0.439986
2.47408	2.66397	2.19486	2.20639	1.68042	2.55089	2.34132	3.82643	2.30723	0.941708	1.97851	1.53929	1.66223	2.53543	2.1777	1.71697	2.05048	2.12004	1.80848	1.86623	3.34024	2.76663	1.84567	1.97387	4.329	2.55167	2.39774	2.19785	1.41141	1.82598	1.57433	3.41612	2.65562	3.7991	2.92646	2.77708	2.42201	2.3818	2.14202	2.54758	2.78575	2.60166	1.69179	2.82326	2.95316	2.53344	2.09608	2.49944	3.29913	3.6324
3.88682	2.4862	1.64576	2.19457	2.17756	2.22336	3.87627	3.30066	2.37394	1.23928	2.83777	1.62787	2.1164	3.37325	2.45501	2.32829	3.2175	1.99294	2.4529	3.18178	4.09132	3.85	4.17938	3.04999	4.02641	3.39029	3.41705	3.88244	1.49947	2.68456	1.82588	3.9984	3.18796	4.36719	3.02233	3.12354	1.72741	3.53507	2.71732	3.9165	4.45712	2.7674	2.9244	4.22315	3.94571	3.44163	3.10646	3.87117	4.13035	4.69175
1.90938	1.46684	1.25083	1.50444	2.04566	2.12757	1.77623	1.85604	1.93341	0.848969	1.98428	1.99175	1.77838	1.98922	1.9656	0.965531	1.39794	1.98958	1.23518	0.857265	3.22061	1.7245	1.79821	1.57304	1.95057	2.41511	1.90629	2.5227	1.88083	1.94371	2.4209	2.76564	1.94303	3.49871	2.19308	1.58879	1.306	1.64169	1.58811	2.52832	2.53569	2.41523	1.56949	1.82755	2.49538	2.09223	1.94069	2.51446	3.06918	2.73905
0.385802	0.384128	0.221239	0.233639	0.291435	0.362057	0.337667	0.148914	0.32551	0.360568	0.303426	0.332524	0.263172	0.422244	1.10358	0.340391	0.285144	0.427241	0.268507	0.191245	0.219101	0.253723	0.770238	0.481858	0.50505	0.461894	0.459982	0.895496	0.135895	0.303896	0.698422	0.327429	0.485461	0.394322	0.304201	0.303545	0.761731	0.475376	0.28192	0.39035	0.418008	0.446309	0.883548	0.762428	0.468494	0.731475	0.590319	0.635324	0.496376	0.195515
1.33754	1.38061	1.38631	1.7372	1.49959	1.73004	1.80313	1.92808	2.16385	1.19069	1.44644	1.65363	1.32535	1.91721	1.71204	1.57171	1.33894	1.8938	0.99167	1.13385	0.984737	2.04203	2.22544	2.97168	2.17155	1.58185	1.42898	1.11248	1.05728	1.60031	1.34205	2.93505	1.64818	1.87417	2.59538	2.32072	0.726586	2.36183	1.5027	1.21253	1.79385	2.01155	1.78237	3.65123	2.47353	1.8315	2.25489	1.34638	3.35109	2.22109
0.723327	0.75884	0.383465	0.95511	0.86103	0.890393	0.470633	0.851136	0.531745	0.855505	0.810767	0.628496	0.871916	0.505306	0.663834	1.11294	1.05215	0.74184	0.772678	0.702346	0.729448	0.496746	0.616143	0.525045	0.749064	0.671051	0.883158	0.775795	0.986972	0.597586	0.827472	0.730674	0.669658	0.509347	0.505715	0.555124	0.310385	0.497537	0.884173	0.26418	0.402787	0.454298	0.695894	0.609533	0.608458	0.653552	0.691706	0.758553	0.591926	0.764818
2.08234	1.48737	2.71643	1.17093	1.46434	2.40465	3.60698	2.08995	2.34044	0.720046	1.30738	1.58223	1.12254	1.72989	1.93806	1.45271	2.17699	1.23075	1.29572	1.31977	3.72218	1.51361	3.33367	1.77607	3.56964	1.79173	1.83709	2.5563	2.62481	2.12332	1.46334	2.02622	2.79994	4.39851	1.11083	5.18457	9.45984	3.64697	2.76281	5.09918	2.67989	1.12334	1.63503	2.88159	3.28818	2.10944	1.42438	3.51716	1.25389	2.72087
1.06849	1.26454	0.761325	0.849762	0.905141	1.10425	0.822436	0.860807	1.39509	1.56853	1.66218	0.892379	1.31371	1.70192	0.995421	1.03721	1.11934	0.812414	0.873286	1.15299	1.42741	1.54693	1.36457	1.63367	1.16995	1.44959	1.11768	1.64813	0.849257	0.773096	1.34794	1.55814	1.98138	1.46073	2.01418	0.776337	1.34232	1.23101	1.39792	1.6621	1.64466	1.34149	0.722804	1.38068	1.72604	1.64949	1.21174	1.76233	1.57662	1.23273
2.52239	2.56654	2.96903	1.82389	5.6443	1.61614	2.40616	1.81676	2.85576	3.50717	3.21667	2.30665	2.16123	2.60417	2.80505	3.69208	6.96427	4.14508	3.8149	1.82732	1.89635	4.31165	4.32788	4.53556	2.26619	2.22568	5.16796	5.05945	4.15541	2.44577	2.25749	3.37644	4.28835	4.69373	2.98072	3.07825	3.07588	5.99161	3.09598	5.56081	5.28989	2.46336	3.20554	3.6985	4.42615	11.7129	5.0997	7.38389	4.38539	2.93505
0.598623	0.552456	0.485131	0.794218	0.790639	0.865951	0.548005	0.649351	0.495638	0.456517	0.7397	0.845237	0.596338	0.597907	0.877732	1.26507	0.60154	0.667512	0.631154	0.609682	0.440063	0.461212	0.363808	0.503474	0.455705	0.743826	0.555772	0.565899	0.851789	0.683387	0.854409	0.517625	0.322924	0.504846	0.390488	0.548486	0.519454	0.311857	0.417624	0.565004	0.761151	0.413582	1.28241	0.515251	0.517518	0.352771	0.739044	0.379061	0.319234	0.381068
0.427296	0.806517	0.353058	0.780945	0.287522	0.497043	0.385089	1.16271	0.386922	0.419674	0.548396	0.783515	0.524219	0.473821	0.576735	0.658285	0.596944	0.505459	0.360205	0.388184	1.9108	0.970874	0.797385	0.806062	0.839701	0.594707	1.09367	0.660153	0.512952	0.317803	0.261472	0.504617	0.592874	0.393236	0.385045	0.53674	0.259255	0.585514	0.757518	0.400625	0.504694	0.357296	0.792017	0.438443	0.407515	0.62905	0.565963	0.403698	0.406273	0.406009
1.22027	0.734107	0.827746	0.502109	1.33154	1.01726	0.927214	0.869792	0.775434	0.728332	0.707014	1.11404	1.03593	0.841114	1.10851	1.17062	0.899766	0.972195	0.685448	0.61885	0.780092	1.23148	1.14448	1.12208	0.826105	0.531265	0.821963	0.919287	0.732547	0.949668	1.36387	1.06843	0.923787	1.11843	1.27618	0.851426	1.31284	0.974659	0.869641	0.687663	0.995917	0.599089	0.974754	1.02008	1.13545	0.905223	2.06173	1.62538	1.20992	1.32786
0.568861	0.465484	0.387537	0.316376	0.534302	0.481162	0.368067	0.314475	0.491932	0.68653	0.240941	0.500425	0.300219	0.222143	0.405186	0.579307	0.914244	0.41425	0.440354	0.387777	0.277631	0.37143	0.343513	0.276755	0.196402	0.377216	0.432563	0.798594	0.378644	0.434273	0.412865	0.31956	0.508363	0.282207	0.158085	0.242589	0.216521	0.379939	0.197449	0.19833	0.338444	0.20141	0.541272	0.3861	0.335289	0.373553	0.255637	0.373622	0.210593	0.294698
1.6314	1.82575	1.21795	1.18923	1.23973	1.22719	1.26223	1.149	1.77204	2.55265	1.41569	1.61295	1.08458	1.44459	1.25315	0.963577	1.28866	1.16171	1.21024	2.5937	2.28859	2.26454	1.39938	3.62766	0.765111	1.72762	1.60146	1.91329	0.908595	1.69975	1.69678	2.1492	2.05423	1.64231	2.06194	1.35918	1.50017	2.32132	1.30019	1.37187	1.99033	1.68671	0.844309	1.75836	2.27733	1.96986	1.98831	2.08286	1.89688	2.09551
0.600673	0.380214	0.422511	0.39847	0.784621	0.469021	0.539753	0.39035	0.491376	0.783454	0.712758	0.588305	0.483419	0.459348	1.06092	1.52098	0.526205	0.815594	0.497611	0.968711	0.652827	0.54336	1.42706	0.905305	0.245363	0.656297	0.679117	0.74118	0.540307	0.903179	0.628259	0.453556	0.378587	0.400978	0.485649	0.601287	0.337484	0.470079	0.372509	0.261705	0.503728	0.178664	0.170126	0.53118	0.737953	0.396668	0.562082	0.387792	0.575374	0.747105
0.324675	0.610203	0.590214	0.620424	0.235505	0.636537	0.495319	0.333867	0.375855	0.394306	0.676041	0.767224	0.590598	0.444207	0.704225	0.527315	0.419041	1.02822	0.958497	0.568634	0.598372	0.534845	0.363531	0.475195	0.425931	0.443341	0.181835	0.274168	0.656944	0.766518	0.278598	0.367607	0.392696	0.336146	0.56654	0.293462	0.45731	0.23681	0.240656	0.524962	0.415282	0.412269	0.519778	0.371858	0.410223	0.649773	0.294942	0.441638	0.321543	0.49087
1.23681	1.03031	1.21907	0.556204	1.68101	1.85963	0.970309	0.857559	1.21684	1.31463	1.55323	1.43949	1.07381	1.44705	1.22273	2.46293	1.3693	1.18776	1.82869	0.584385	1.54787	1.95768	2.50627	1.66589	1.269	1.20385	1.39645	3.04897	0.990491	1.44182	1.4596	1.74621	1.48238	2.28264	1.26445	1.04202	2.05368	1.6856	0.481209	1.99394	3.77829	1.18802	2.25007	2.22232	1.83864	1.35122	1.10702	2.55781	3.12393	1.97851
1.25617	1.67202	0.612257	2.26855	0.762079	1.06279	1.08134	0.974944	0.666667	0.766342	1.0729	0.886682	0.964413	0.721917	1.42531	0.840266	1.25891	1.02196	0.859402	0.772201	1.65824	0.870625	1.17543	0.855725	0.999301	1.02751	1.63449	0.814067	0.547106	1.10113	1.1586	1.82892	0.721136	0.80289	0.633995	0.791014	0.463908	0.522193	1.16698	0.515943	0.858885	0.524411	1.0515	0.745657	0.685965	0.692713	0.922339	0.628654	0.742556	0.563317
1.2107	0.732011	0.880282	1.21275	0.906125	1.03938	0.90269	0.934929	0.646162	0.919287	0.740796	0.728014	0.664275	0.847386	0.950029	0.997407	0.808146	0.899119	1.08535	0.954654	0.756029	0.721085	0.619387	0.869792	0.905059	0.938967	0.831393	0.661638	0.856164	1.43268	0.708818	1.03193	0.745434	0.79466	0.660415	0.572344	0.690751	0.666711	0.689941	0.737246	0.763534	0.752729	0.720877	0.868056	0.629247	0.790389	0.942241	0.746269	0.578972	0.744103
1.02672	0.754546	0.833125	0.848392	0.78827	1.58368	0.873134	1.17093	0.937119	0.65304	0.92885	0.821423	1.10017	0.834794	0.826173	0.658415	0.834655	0.820277	1.02165	0.761151	0.661201	0.824674	0.600817	0.747999	1.66633	0.812612	0.689513	0.76799	1.2385	1.18675	1.11468	0.92098	0.729182	0.731261	0.56013	0.62422	0.58751	0.737191	0.846668	0.649308	0.775615	0.593225	0.879121	0.965251	0.687853	0.726639	0.730994	0.612858	0.761325	0.767519
0.313686	0.222291	0.267745	0.220196	0.323436	0.261165	0.293281	0.29873	0.267137	0.271658	0.217174	0.242389	0.200904	0.366461	0.272717	0.373497	0.203198	0.221675	0.179128	0.244385	1.12123	0.255284	0.332679	0.274589	0.387732	0.220201	0.30869	0.228875	0.146591	0.145618	0.501379	0.266539	0.255839	0.303804	0.31249	0.506919	1.00341	0.36531	0.406951	0.58997	0.386877	0.279065	1.63688	0.217019	0.177283	0.399712	0.867679	0.507331	0.41738	0.272227
0.931185	1.54784	0.848392	0.905387	1.32696	0.653168	0.787216	0.630159	1.21364	2.72139	1.19399	1.16362	1.23943	1.39355	1.97235	1.52133	1.36117	1.56932	0.839137	3.89514	0.773335	2.74763	0.709572	0.9997	0.823791	1.2161	0.916758	1.25315	0.732654	1.50916	0.726427	0.937295	0.952925	1.02698	1.58869	0.518538	0.645703	0.856164	0.965251	0.443145	0.8	0.526843	0.39681	1.05271	0.916254	0.616713	0.626527	0.651976	0.894775	0.945537
1.45216	0.907194	1.52875	0.976467	1.63324	0.634679	1.11501	1.17254	0.981836	1.38448	1.1573	1.26836	1.56998	1.15776	1.20498	2.30771	0.972857	1.8442	1.20136	1.61671	0.430515	1.00232	0.88574	1.17383	0.985416	1.60821	1.13829	1.26741	1.056	1.32113	1.25824	1.35108	0.728014	0.786287	0.710631	1.17686	1.20649	0.775855	0.628378	1.14133	1.13246	0.740741	2.18637	0.813008	0.679995	0.740686	1.69362	0.896218	0.793966	0.832155
1.91391	2.93049	2.85551	2.16151	0.722595	1.47724	1.15934	2.18136	1.8443	2.96419	2.28029	1.61765	3.19305	5.41917	1.84403	1.2282	1.0753	1.46688	0.895656	3.01078	2.16835	4.35521	2.29316	1.74993	1.94209	3.24118	2.69186	0.833264	1.14858	1.32658	1.83581	1.44672	1.79189	1.71459	4.84496	0.370042	0.880824	1.90964	1.1647	0.784745	2.0307	1.39942	0.883548	1.35879	1.00857	0.483582	0.784929	1.75297	1.12351	2.02601
0.642715	0.596837	0.532481	0.667289	0.864827	0.340785	0.339064	0.485696	0.693193	1.14355	0.940026	0.905633	0.748279	0.564111	0.658935	0.735402	1.40714	1.00638	1.46484	0.81646	0.904159	0.565611	0.745268	0.741895	0.49554	0.53087	0.786844	0.83689	1.19256	0.619118	0.553067	0.700869	0.675539	0.362582	0.647123	0.292107	0.443991	0.660502	0.565195	0.439599	0.664673	0.669031	0.617398	0.59577	0.673219	0.543596	0.756601	0.666444	0.564079	0.715256
0.964134	0.873515	0.898231	1.00701	1.3295	0.569833	1.00647	1.0673	1.34127	1.04779	1.31512	1.06243	1.21167	0.938615	1.07988	1.37861	1.57557	1.76435	1.67586	1.3728	1.5419	0.87581	0.955019	1.29413	1.20171	0.758323	1.00573	1.44494	1.68279	0.808342	1.11522	0.888336	0.951294	0.946342	1.12661	0.694589	0.99691	0.927988	0.822842	0.963391	0.870474	1.65036	1.08419	0.87943	1.08783	0.8992	0.913576	1.09473	1.14345	1.04319
1.05636	0.764701	0.67595	1.21205	1.62206	0.86192	0.894215	1.27096	1.0391	1.39821	1.06078	1.25124	1.55953	1.00994	0.873668	1.82189	1.39249	1.27818	1.22985	1.08251	2.15318	0.925069	0.780153	1.09211	0.881213	1.12328	1.2071	1.2067	2.05057	1.33752	1.54984	1.05301	0.854701	1.06112	0.888731	0.347114	0.517331	0.746993	1.07488	0.89063	0.930839	0.770297	1.03496	1.00649	0.992063	0.869565	1.16511	1.05358	1.02453	1.01176
1.71694	1.46261	1.12897	1.74313	1.22222	1.69745	1.68016	1.32163	1.67878	1.09803	1.98985	1.61561	2.0211	0.873668	1.74037	3.17309	1.35781	1.7891	2.1504	2.29221	2.14975	1.19733	1.16225	1.20582	1.01756	1.08924	0.967024	1.67664	2.50319	1.03724	2.01256	1.12913	1.29207	1.80427	1.17312	0.592417	1.13812	0.911494	1.10714	1.04812	1.20847	0.693626	1.41239	0.891902	1.44613	1.61397	1.35289	1.84997	1.6581	1.74843
1.40188	1.65363	1.17191	1.71851	0.810176	0.722387	0.877424	1.17297	1.15607	1.17455	0.952018	1.53856	1.36151	1.94917	1.9314	1.30191	0.874891	0.886054	1.16008	1.69863	2.46208	2.61445	0.877039	0.961261	0.961169	1.278	1.15299	1.86227	0.681106	1.89635	0.979912	1.24769	0.782534	1.1724	1.29574	0.536021	0.73779	0.770951	1.21849	0.553771	1.04854	1.02864	0.411913	0.815262	0.891902	0.468472	0.784868	0.679995	0.885426	1.86738
0.610128	0.523122	0.392665	0.569217	0.790764	0.574581	0.445097	0.377772	0.386713	0.710126	0.361991	0.597193	0.645995	0.438597	0.513426	0.848752	0.481278	0.248979	0.462022	0.842673	0.755059	0.309301	0.291172	0.659326	0.276878	0.434764	0.477623	0.362043	0.331686	0.450958	0.955932	0.387057	0.39482	0.377586	0.361481	0.250683	0.40838	0.379925	0.413514	0.290858	0.334661	0.348602	0.397346	0.36475	0.405581	0.296595	0.707614	0.438039	0.294343	0.350349
2.31016	3.1737	1.93263	2.25018	2.06954	3.01042	1.92012	1.72717	2.71106	1.81498	1.83645	2.94022	1.37737	3.03021	2.7587	0.959693	1.76134	2.27268	1.40572	1.6129	1.60416	3.90686	3.77245	3.75136	2.52404	2.11349	2.11699	1.74487	1.60013	3.27837	1.93768	2.3855	2.08952	2.28477	3.09081	3.89181	1.7627	2.46627	3.15129	1.43019	2.47954	2.04119	3.00662	4.12099	2.89922	2.79814	4.18883	2.62116	4.71965	2.82773
2.01455	0.859254	0.655179	1.0062	2.62812	1.10268	1.41012	1.04116	1.28939	1.19339	0.931967	1.77715	2.15862	1.61441	2.12283	0.953562	1.76264	1.54345	1.61069	1.56769	2.20061	1.70663	2.51364	4.73956	1.61676	0.991867	2.37971	1.37093	1.0479	1.4748	1.28866	1.75159	1.55106	1.44325	1.77942	4.37943	0.96665	2.00876	2.94629	1.72577	2.26188	1.03854	2.41394	2.10433	2.2481	7.78877	3.16656	2.75573	2.09415	2.09485
0.736214	0.44823	0.569022	0.492514	0.790264	0.953471	0.373776	1.00102	0.522193	0.496229	0.717412	0.676041	0.609533	0.646705	0.504694	0.865052	0.649308	0.696233	0.703433	0.461255	0.869414	0.524054	0.656771	0.476122	0.912909	0.544811	0.935016	0.83647	0.582343	0.931099	1.07175	0.64704	0.624181	0.634035	0.419886	0.241243	0.325129	0.398058	0.591576	0.263234	0.526371	0.827335	0.233187	0.429332	0.427661	0.434273	0.580114	0.477897	0.645786	0.35057
0.932836	1.01675	0.554109	0.898311	1.17698	0.695024	0.797448	0.700624	0.849257	1.23821	1.03543	1.12648	0.777907	0.710177	1.14847	0.888494	1.12089	1.2192	1.31888	0.764467	0.98561	0.688042	0.781372	0.85419	0.722648	0.951475	0.997407	0.945895	1.26054	0.863931	0.8371	0.870701	0.585137	0.843099	0.974849	0.433238	0.204646	0.760861	0.570711	0.573526	0.868357	0.479916	0.737028	0.802375	0.90082	0.802826	0.898715	0.869717	0.946074	1.25556
0.453618	1.20934	0.39521	0.41848	0.364924	0.29649	0.44047	0.226019	0.47792	0.9176	0.447568	0.665115	0.733676	0.491159	0.706964	0.443538	0.706714	0.734592	0.807363	0.425858	1.28768	1.33964	1.19134	0.785546	0.383524	0.609979	0.610426	0.537317	0.486452	0.598337	0.446887	0.62135	0.990099	0.712048	0.672585	0.907194	0.480885	0.869112	0.819336	0.797257	1.03224	0.441599	1.06455	0.497389	0.726322	1.4189	0.766342	1.45134	0.699496	0.835771
4.28504	2.64564	4.70854	4.79501	3.66099	3.57667	2.33525	2.60451	4.31183	5.67054	4.40102	4.66309	5.55463	6.16523	4.56204	3.02435	3.37166	2.96718	3.54912	6.79348	3.03205	5.82445	4.65441	5.00075	2.8165	7.33837	3.36259	4.47928	2.46196	7.3497	3.38983	3.77173	5.94212	5.21866	6.23947	5.98194	5.69022	4.66266	4.08547	6.45911	6.83761	2.02478	2.69709	5.57165	5.89553	9.54107	4.74563	6.91659	4.09685	3.72121
0.160169	0.186431	0.206432	0.231118	0.143717	0.240292	0.112313	0.320523	0.215568	0.300138	0.136752	0.397836	0.355328	0.176722	0.477486	0.27922	0.121702	1.08613	0.121724	0.136907	0.0696524	0.342701	1.11481	0.659718	0.268601	0.455042	2.3571	0.455063	0.0565068	0.317148	1.35595	0.360205	0.256404	0.163999	0.360373	0.184077	0.250451	2.21853	0.132596	0.23131	0.628852	1.72951	0.531972	0.305409	0.377701	1.34059	0.348469	0.777544	0.767872	0.601106
0.275285	0.36974	0.322674	0.184383	0.128426	0.306636	0.226055	0.435388	0.301187	0.160321	0.368514	0.332193	0.157381	0.158914	0.185518	0.24888	0.224316	0.19566	0.249825	0.130151	0.339905	0.303426	1.52982	0.293135	0.383568	0.126694	0.467858	0.222886	0.110181	0.24001	0.232526	0.481093	0.520589	0.35142	0.328537	0.225438	0.727273	0.619157	0.265111	0.404826	0.365831	0.337735	0.492611	0.193054	0.383083	0.248201	0.153553	0.354409	0.380793	0.437044
0.987849	0.78376	1.01545	0.898473	0.384586	1.28248	1.1968	1.33115	1.09275	0.496007	0.716897	1.56252	1.04117	0.542446	2.14137	2.25464	0.701607	1.18552	0.690942	0.609905	0.987264	0.991178	0.895095	0.87974	1.27879	1.39903	1.01846	0.869112	0.882145	0.952472	0.742556	1.06632	1.1504	1.48082	1.20378	0.94402	1.08981	1.16588	0.956206	1.35984	1.27871	0.922339	1.23933	1.28987	2.39728	1.82849	1.77223	1.12635	1.85031	1.39702
1.50609	1.09983	1.46578	0.880514	1.74152	1.47997	2.2554	1.70981	0.983381	1.12208	1.54307	1.16519	0.791891	1.24791	1.33567	0.881679	1.19433	1.97243	2.0178	1.05589	1.92382	1.459	5.11876	1.64241	1.57418	0.504923	1.63527	1.12556	1.23848	1.57945	1.51352	1.49249	1.43833	1.54024	1.40928	6.55953	1.28292	2.0967	1.81865	1.15588	2.50081	1.26496	2.88792	1.79714	1.21364	4.18375	2.90495	2.66809	2.25724	2.55219
1.24727	1.41874	1.07951	1.20454	1.50541	1.19099	0.913743	1.19005	1.07665	1.49218	0.998004	1.29395	1.20903	1.23127	1.33576	1.3545	1.40948	1.04741	0.920217	1.17334	1.0801	1.04889	1.03369	0.953289	1.1271	0.818532	1.27463	0.989217	1.26693	1.31699	1.18135	1.17919	1.14853	1.42478	0.897908	0.867528	1.42794	1.07527	0.757289	1.00526	0.90876	0.875887	0.918695	1.03993	0.972573	1.00726	1.0872	0.972101	1.02628	0.918274
2.56878	2.6801	1.56873	2.11761	0.954107	2.2407	1.90367	4.44879	1.31498	1.12074	1.99338	3.58384	3.24865	1.52667	4.4018	2.06224	1.35256	1.76691	1.2539	3.16686	4.86594	2.09253	1.908	1.17721	0.649477	1.67681	1.17664	1.11416	0.914327	1.58983	2.82869	3.10887	1.85165	1.56006	1.66019	0.547795	0.803407	1.00957	1.6011	0.923446	1.23564	0.598265	1.47857	1.78177	1.01551	0.828775	1.34887	0.996016	1.39388	2.70841
1.12036	0.676087	0.881834	0.971912	1.10334	1.26467	0.584078	0.78672	0.74912	0.754831	1.1788	0.814465	0.617322	0.73244	0.821288	0.807298	1.16256	0.892061	0.768285	0.913826	0.670916	0.78827	0.516609	0.746547	0.672631	0.687144	0.708868	0.520535	0.989413	1.06261	1.6021	0.945269	0.553403	0.690465	0.724323	0.626174	0.463006	0.591576	0.63674	0.500375	0.62692	0.465333	0.615726	0.877732	0.756945	0.56899	0.796242	0.568634	0.538764	0.690322
1.11297	1.20375	1.56863	0.892061	0.922084	1.24163	1.60177	1.50236	1.1494	1.10254	1.14912	1.60712	1.73286	1.51055	1.37404	2.05618	0.748391	2.37976	1.03796	0.804635	3.49809	2.08786	1.3909	1.60256	1.23672	1.5953	1.802	1.73696	0.419059	1.59046	2.12242	1.5807	1.97472	1.56126	1.38017	0.930579	2.40142	1.77674	0.852878	2.83777	5.36625	1.11408	1.48891	1.31938	2.51965	1.94002	3.21771	4.6681	2.52838	2.39774
5.41829	3.63557	3.84527	3.87717	3.34325	5.80147	4.21443	5.90667	3.80026	2.22534	2.93746	2.87778	3.41076	4.18463	3.2175	2.37727	2.61151	4.41092	2.62171	2.36083	5.46807	5.40541	3.57756	3.21895	9.20387	3.60581	3.44697	3.92496	1.65079	2.23145	2.29253	6.58631	3.87867	8.43953	5.01077	5.6993	3.72634	4.96722	4.12184	4.47888	3.98549	5.56545	2.26116	4.88234	5.65867	5.26399	4.02204	5.23314	6.68807	5.59754
0.760919	1.86161	1.20581	0.853097	0.543242	0.872296	1.20243	1.13123	1.00916	0.754945	0.736431	1.15044	2.36726	0.970685	3.01541	0.827541	0.634518	0.78064	0.560947	1.69578	2.30378	1.38404	1.41341	1.40895	0.753012	1.49528	2.22286	0.902446	0.321781	1.25116	0.985902	1.73265	1.98772	1.67698	1.92508	0.767754	1.74718	3.15906	1.65865	1.1849	1.96769	1.53749	0.765873	1.25655	1.43819	1.05151	0.786473	1.44017	1.70923	1.59862
0.318107	0.202683	0.209	0.401429	0.316136	0.232818	0.168759	0.286	0.244654	0.588859	0.46681	0.358551	0.374111	0.255584	0.378344	0.493705	0.369167	0.460936	0.814996	0.249582	0.457896	0.198645	0.277085	0.28618	0.188523	0.190632	0.323635	0.482859	0.522357	0.184556	0.445296	0.296077	0.351914	0.167479	0.248862	0.146908	0.226963	0.239624	0.252277	0.196363	0.298543	0.330491	0.187431	0.173762	0.242943	0.277377	0.326669	0.339133	0.312285	0.285641
2.38124	1.92946	2.0345	2.89906	1.98032	1.53257	2.07568	1.83107	2.01483	1.25415	1.58338	2.17047	2.69288	2.55356	3.45125	1.44774	1.94928	2.04053	1.55015	1.84911	2.63866	2.42471	6.50364	3.77159	1.86912	2.8303	2.50463	2.03293	1.35918	2.17599	2.40131	3.13913	2.2169	3.05838	2.44045	2.73785	1.75414	2.87637	2.51073	2.02413	2.3713	1.6562	1.46227	2.50231	3.16596	2.43908	2.51332	3.69795	3.13706	3.23248
0.694493	0.804959	0.707264	0.747943	1.16302	0.576402	0.926441	0.55371	0.764409	1.24573	1.08985	0.738661	0.87382	0.691946	0.878503	0.814133	1.24959	1.0455	0.975515	0.573	1.02579	0.594424	0.63597	0.71449	0.83956	0.834585	0.824266	0.962094	1.00698	0.801667	0.821828	0.91391	0.756315	0.998004	0.649477	0.35782	0.383995	0.758668	0.415455	0.647501	0.637755	0.421053	0.601974	0.917684	0.902364	0.532396	0.898311	0.797575	0.689037	0.660284
0.75392	0.508259	0.474316	0.364857	0.708265	0.862292	0.57277	1.31721	0.86259	0.583226	0.800384	0.513584	0.248855	0.922169	0.708617	0.79447	0.663658	0.860659	0.865801	0.413138	0.505664	0.72197	1.82862	0.900901	0.731208	0.371664	0.85034	0.81606	0.879894	0.811162	0.657938	0.912492	0.824334	0.819471	0.910913	0.756315	1.38072	0.970026	0.379925	0.750131	1.1718	0.946611	0.889759	0.87535	0.987849	1.62774	0.717566	0.79321	1.43131	0.728916
1.28795	1.26298	0.921659	1.78447	1.64908	1.55848	1.35779	1.51554	1.79269	0.865127	2.01159	1.90698	1.10474	1.27566	1.08613	1.16189	1.7209	1.83073	0.75643	0.952018	1.20562	2.17217	2.57812	2.42701	1.43219	1.08075	1.59401	1.42753	0.762835	1.44779	1.32811	2.59707	1.36338	1.52763	1.89254	1.72619	0.508595	2.30659	1.26611	1.21246	2.13092	1.02017	2.7606	2.7407	3.08747	2.0229	2.90748	1.22791	3.71581	2.41348
0.633192	0.387657	0.426403	0.819538	0.631154	0.360516	0.488902	0.379147	0.504032	0.682082	0.62135	0.471876	0.68278	0.426912	0.746269	0.80289	0.4939	0.449095	0.589032	0.41266	0.595841	0.319448	0.308223	0.401542	0.314515	0.620001	0.365644	0.382073	0.621195	0.559785	0.715103	0.514007	0.362135	0.363875	0.310655	0.216212	0.202585	0.280907	0.421195	0.362214	0.323091	0.906454	0.378644	0.353744	0.465051	0.366582	0.354359	0.250828	0.24681	0.620193
1.26847	0.83949	0.464123	1.12554	1.48076	1.77693	0.557414	0.964599	1.18068	1.07724	1.27189	1.92637	0.0778331	1.07513	1.09273	1.69007	1.00651	1.28876	1.06862	0.877578	1.21984	1.21007	1.83881	1.44917	0.878889	1.00424	1.37444	1.15951	0.878735	1.17445	0.910001	1.36846	1.13554	1.47288	1.12702	1.98067	0.83167	1.52994	1.51833	2.30883	1.48527	0.834585	1.39606	2.46366	1.50446	1.41327	0.98174	1.80258	2.21926	1.4281
1.95599	1.45218	1.46567	0.934841	1.41377	1.24116	1.58962	1.14519	1.84645	1.02336	1.97675	1.29705	1.34104	1.85298	1.50342	1.76038	1.63937	2.24901	1.61593	0.994728	1.60072	2.58005	2.60654	1.58438	1.31418	1.38837	1.60418	2.3483	2.2414	0.923617	1.56184	2.02996	2.4322	2.24628	1.77667	1.55963	1.33287	2.87076	1.31146	2.23005	2.08047	1.05792	1.15995	1.87684	2.66674	2.38163	2.67544	2.54654	2.57288	2.62013
1.04149	0.661507	0.660851	1.08922	0.805023	0.956938	0.939408	0.9758	0.600673	0.853097	0.659805	0.669344	0.571429	0.745657	0.792833	0.986388	0.801603	0.74599	1.04802	1.01805	0.660022	0.640287	0.532595	0.695701	0.711491	0.808669	0.719735	0.60595	0.780031	1.30733	0.737953	0.936593	0.697399	0.768521	0.54933	0.551511	0.61736	0.600348	0.519076	0.595309	0.718081	0.688279	0.533561	0.702346	0.590772	0.681989	0.83091	0.671592	0.525514	0.677369
1.20042	1.08566	0.901469	1.98874	1.09275	0.90967	1.57208	0.958038	1.0363	1.32142	1.30586	1.21117	1.0944	1.12458	1.35604	1.33685	1.34326	1.61267	1.33804	2.47641	0.663834	1.48289	1.13266	0.8188	0.989707	1.37798	1.64004	0.840619	1.68535	0.862143	0.997705	1.34682	1.00201	1.07244	1.19527	0.985513	0.508699	0.882068	1.43885	0.710278	1.1263	0.723641	1.24182	1.3198	1.04997	1.07689	1.19986	0.810373	1.02716	1.05306
1.02977	0.608125	0.68264	0.867303	1.22155	0.765404	0.859033	0.986485	0.909339	1.00905	1.38569	1.18392	1.09938	0.786164	0.996413	1.31853	1.33438	0.932923	1.30768	0.984737	1.26374	0.854336	0.940026	0.842531	0.971157	0.697886	0.921829	1.01853	1.57062	0.937295	1.33445	0.915667	0.73888	0.971817	0.867152	0.483022	0.825968	0.856604	0.827677	0.769112	0.845094	0.672179	1.01854	1.02926	0.833125	0.694203	0.885583	0.947957	0.889047	0.878889
0.41834	0.392881	0.299007	0.733353	0.181581	0.325013	0.307721	0.221175	0.309713	0.256016	0.19571	0.169794	0.5383	0.31736	0.235977	0.570125	0.222519	0.514748	0.262288	0.653168	0.331532	0.363333	0.0921574	0.287431	0.420645	0.302627	0.149604	0.136511	0.409752	0.217165	0.914495	0.380706	0.169185	0.22042	0.272405	0.132885	0.181871	0.110473	0.105735	0.169566	0.118739	0.482323	0.241074	0.321409	0.19213	0.0596623	0.176903	0.0874432	0.224578	1.50743
9.17515	17.319	64.4621	11.4678	3.55416	9.94728	2.4681	59.011	7.71188	23.0888	4.0992	10.8534	15.6779	29.6217	2.81936	5.7867	10.9445	0.677277	9.46522	25.0564	1.12899	53.4188	0.390793	30.9511	15.6485	11.375	4.06884	2.4338	9.79816	2.95701	6.0562	3.84985	1.81934	15.048	24.599	0.601576	2.12657	8.66776	1.29943	8.85191	6.75493	14.9399	0.441404	6.26292	1.91461	0.364352	0.933707	1.70529	3.09674	10.4549
0.56494	0.555001	0.398613	0.369154	0.917179	0.722648	1.07581	1.01828	0.625782	0.35979	0.74129	0.6595	0.411896	0.838364	0.916254	0.232261	0.480307	0.518188	0.664849	0.296226	0.915667	0.463349	1.54548	0.778513	1.22728	0.785423	0.469991	1.13766	0.34484	1.15906	0.988826	1.0029	0.649562	0.947778	0.507151	0.528178	0.871688	1.04213	0.525901	0.752672	0.994728	0.790264	0.543065	0.775555	0.698324	0.978091	1.40455	0.949668	0.900739	1.10743
0.622007	1.57423	0.510256	0.633032	0.384379	0.348821	0.60183	1.16459	0.621968	0.461467	0.536538	0.364378	0.516636	0.656814	0.819806	0.4588	0.378831	0.536222	0.604558	0.35957	0.904895	0.584453	1.32947	0.470965	0.562746	0.669434	0.6832	0.627274	0.489524	0.688563	0.507511	0.687191	0.652443	0.571984	0.598982	0.427077	0.951294	0.808015	0.633633	0.420734	0.735456	0.916087	0.76746	1.20789	1.00384	0.810373	1.16419	0.856164	0.827335	0.851136
1.87896	1.92086	1.81994	1.84976	2.4508	4.29886	2.27692	1.65497	4.37503	3.03352	2.94837	4.19956	2.29027	4.56976	1.91069	1.24615	2.86131	2.19679	1.2788	2.38709	3.37427	5.15889	7.27114	1.57478	2.84633	2.69549	2.37344	2.22163	1.90498	5.66027	4.24737	2.98	2.71872	2.51807	3.46861	4.04744	1.55335	3.37644	6.4082	2.39269	3.01141	1.09604	2.55944	3.34013	4.02139	2.66375	7.4162	2.83126	5.66091	3.00689
0.573329	0.621736	0.506201	2.05897	0.577034	0.813471	0.68686	0.75392	0.776639	0.421425	0.822707	0.644371	0.567988	0.626449	1.27325	0.868433	0.515066	0.987557	0.578503	0.580821	0.700231	0.417415	3.13676	0.587199	0.589553	0.870928	0.599628	0.475941	0.80795	0.931185	0.748335	0.568214	0.331246	0.526482	0.552334	0.405729	0.305493	0.405252	0.221941	1.44674	0.668807	0.417484	0.615991	0.557196	1.07926	0.500701	0.618123	0.522384	0.771605	0.577634
0.397725	0.26079	0.42425	0.397947	0.786596	0.454959	0.442615	0.509476	0.416129	0.518511	0.590702	0.490701	0.674536	0.657765	0.622316	0.570841	0.338169	0.338089	0.447287	0.327364	0.698617	0.453865	0.492926	0.543124	0.611284	0.390168	0.516422	0.656426	0.629445	0.436262	0.520291	0.498654	0.465636	0.6141	0.426712	0.428908	0.969368	0.606575	0.267144	0.816127	1.11626	0.793777	1.08439	0.808538	0.58045	0.593401	0.738661	0.709623	0.563698	0.665469
1.72565	1.76547	2.24075	1.51396	1.47997	3.57436	2.46609	2.27454	2.06194	1.37825	1.66528	1.98295	1.51644	3.0349	3.39363	1.16481	1.49047	3.16426	1.42298	1.79009	1.77832	4.60003	4.0476	2.75467	2.13607	1.37391	2.95858	1.35115	1.34398	2.80789	1.32449	1.78888	1.82648	2.1668	2.62281	3.1956	1.59139	3.24023	3.85386	1.8455	2.2041	1.58889	2.84657	3.72495	2.72546	4.06091	4.38885	2.96235	3.68107	2.36239
0.205931	0.328958	0.157953	0.139528	0.397235	0.306852	0.198181	0.170966	0.236418	0.12092	0.196982	0.178597	0.16182	0.260071	0.230926	0.100337	0.151932	0.175543	0.166146	0.103406	0.158889	0.206705	0.700722	0.281247	0.339685	0.159411	0.361089	0.536394	0.216132	0.183422	0.2696	0.198886	0.281762	0.171485	0.259134	0.258552	0.239131	0.378487	0.199306	0.185288	0.165829	0.649477	0.699447	0.277855	0.427405	0.291214	0.255689	0.229274	0.403128	0.183013
12.3877	5.76968	36.105	4.91497	22.2831	7.74893	20.9227	65.1423	16.2588	17.391	11.867	47.8675	4.33107	24.9569	9.37383	20.0268	10.668	13.9876	21.6216	5.14853	5.08156	45.2386	17.7911	19.0451	14.914	4.82276	15.0087	21.8761	4.93998	6.45369	41.4938	12.759	27.4461	12.1098	11.2291	32.8666	50.3601	27.5885	15.561	48.7329	15.7592	53.5046	14.6761	18.4764	30.5764	65.5781	8.32432	23.5538	28.7629	11.0754
0.595167	0.645661	0.423478	0.334213	0.315806	0.352647	0.453721	0.392434	0.554693	0.2955	0.531519	0.341006	0.470743	0.590249	0.596837	0.549481	0.536337	0.501781	0.539374	0.587544	0.367121	0.621157	0.812282	0.748279	0.527927	0.529493	0.758035	0.68918	0.576535	0.379319	0.486263	0.688563	0.614893	0.664408	0.483489	0.387387	0.518591	0.649056	0.35759	0.56035	0.763475	0.921914	0.69808	0.611471	0.686342	0.689085	0.795861	0.538648	0.685636	0.796305
3.76478	4.69726	2.82606	2.41674	2.77986	2.65753	4.51937	2.58231	10.5303	4.43991	3.23666	4.40898	4.88257	8.01989	3.65457	2.44385	4.27004	4.18795	1.75171	3.8348	3.07229	8.83626	4.85343	5.30983	4.16216	5.45286	4.72099	4.58779	3.4644	2.06203	2.06915	6.49266	5.2615	5.98802	9.27988	6.09236	2.27713	4.66657	6.73991	3.2963	3.78129	3.53694	5.36538	9.15416	11.7668	3.12813	10.3346	5.57414	10.0754	6.03683
1.29742	1.68277	1.09847	1.21623	2.23994	1.44394	2.31498	0.940468	1.97629	1.04451	1.65568	2.02163	1.47599	1.78047	1.18533	0.738498	1.3969	3.13657	0.95648	0.818264	1.3309	1.55051	1.82963	2.68428	1.18325	1.47936	1.82979	1.21462	1.07597	1.07283	1.60395	1.6767	1.55948	1.79131	1.9859	3.82936	1.34867	2.58572	1.65678	1.38093	1.2956	1.29828	1.30993	2.21474	2.7533	1.82986	3.67823	1.51229	3.33957	1.44051
1.52376	0.856898	0.720046	1.06292	2.4796	0.781189	1.69958	1.13025	0.978186	1.14979	1.68859	1.62573	1.85615	0.947149	1.40609	1.6346	2.30362	1.86057	2.37857	1.55051	0.860585	1.27982	0.779606	0.928333	0.751371	1.38313	1.32459	0.994332	3.50128	1.45209	1.30434	1.28669	0.996413	1.50839	1.07316	0.871156	0.511012	0.868583	0.780153	0.632351	0.901063	0.330262	1.37344	0.842602	0.909173	1.09186	1.0261	1.11283	1.07652	1.20408
0.511587	0.380952	0.411743	0.506355	0.355303	0.322331	0.665159	0.731797	0.66769	0.367026	0.552395	0.537201	0.676407	0.469859	0.639182	0.563	0.367067	0.469241	0.404367	0.404907	0.519832	0.458884	0.805867	0.579643	0.497314	0.344566	0.765052	0.58827	0.444168	0.459834	1.01652	0.524714	0.433144	0.668941	0.565036	0.862441	0.62004	0.349699	0.305176	0.799105	0.647543	0.577001	2.05385	0.517438	0.580619	0.523286	0.619425	0.898473	0.614251	0.772917
2.65922	1.60102	1.29745	1.3372	2.40038	1.20607	1.46574	1.60364	2.28133	1.47234	2.27077	2.32234	1.24629	3.05213	1.92537	2.1073	2.59565	3.15637	2.52391	2.11609	2.799	2.14555	6.22239	3.17733	2.17727	3.03905	1.90465	4.96697	2.56904	3.42936	1.40576	3.29175	2.87158	4.82463	2.89981	1.19299	1.43883	1.96379	1.99928	1.665	2.93212	2.60092	5.57072	2.64257	3.7143	5.66958	3.65083	4.96969	4.85131	4.38673
1.24053	1.99673	1.19099	0.826446	0.683293	0.773874	1.11933	0.995124	1.49515	0.715512	1.66603	1.35761	0.792644	2.17533	1.27406	0.671186	1.39295	0.74195	0.958038	0.808931	1.66578	2.07987	1.36902	1.66906	1.23571	1.82232	1.18621	1.42878	0.644164	0.785299	1.15976	0.978569	2.61076	1.18749	1.82976	1.02393	2.19245	1.58148	1.72807	2.26531	1.60945	1.60339	0.912575	1.98346	1.98839	1.70195	1.01729	1.26859	1.07346	1.38754
1.51936	1.8164	1.17356	9.64879	1.26688	1.04457	1.50691	1.24956	0.962279	0.661857	0.98912	0.911826	0.782534	1.32031	0.883861	1.31448	1.44636	1.06263	0.886368	0.950842	1.64861	1.09617	2.24457	0.945627	1.27913	1.30714	1.26905	1.20404	0.79321	1.66174	1.16	2.25933	1.52672	2.0004	1.54629	2.60743	0.965437	1.26451	1.02616	1.6662	1.66825	1.49705	1.14114	1.39425	1.39045	1.43279	1.33005	0.89063	1.67124	1.74359
20.5969	70.2395	126.999	68.88	46.0257	60.8162	32.5277	150.691	106.359	31.8766	43.9831	91.1328	29.4369	81.9403	32.2872	27.5475	71.2048	36.3359	16.6008	22.666	18.9696	46.1106	45.3721	66.2866	199.39	45.7038	149.757	84.7314	1.3881	36.1598	60.9125	72.4375	96.4506	39.7867	152.328	47.792	110.367	28.7654	71.0429	196.19	70.8969	285.992	41.2167	113.389	105.658	41.0004	48.5131	84.9041	200.088	39.3329
1.05184	0.833125	0.838364	0.996314	0.805477	0.77694	1.09021	0.870322	0.669254	0.843882	0.730353	0.687522	0.629287	0.862962	0.911079	0.910747	0.737409	0.776699	1.02185	1.02983	0.819269	0.66379	0.577234	0.887233	0.725268	0.888178	0.71541	0.599772	0.775374	1.29172	0.675128	0.989217	0.702988	0.792959	0.538793	0.725374	0.678104	0.648172	0.680087	0.74499	0.791077	0.759879	0.814332	0.76646	0.567215	0.683807	0.813471	0.712048	0.550873	0.67245
0.358513	0.508363	0.653381	0.383039	0.317793	0.604266	0.374462	0.626409	0.367444	0.68106	0.280986	0.320729	0.437025	0.276556	0.462492	0.687994	0.354421	0.428064	0.237428	0.496968	0.348032	0.326531	0.367188	0.424196	0.602482	0.455228	0.768521	0.403242	0.193233	0.49985	0.291571	0.385788	0.389469	0.301741	0.592312	0.334482	0.437637	0.362004	0.233902	0.261801	0.303343	0.463499	0.295753	0.315627	0.373916	0.225149	0.300382	0.304962	0.278404	0.358256
1.12306	1.09885	0.667646	0.703136	1.5555	1.08092	0.982029	0.680874	1.66828	3.33056	1.46359	1.07414	0.88433	0.754831	1.15778	1.75617	2.01458	1.84043	1.25715	0.684135	1.1785	0.819672	0.993147	0.950299	0.546538	0.978474	0.73416	2.17855	1.32686	0.919371	0.72338	1.11261	1.38874	1.333	0.381447	0.635364	0.491908	0.728598	0.382717	0.720773	0.956206	0.401381	0.654664	1.13877	1.16248	0.864304	0.85778	0.90703	1.04902	1.00827
0.873744	0.825764	0.773515	1.55289	1.0304	1.22426	2.35532	0.444741	0.923873	0.627195	1.12979	1.35472	0.534931	1.18406	0.772141	2.92158	1.05147	0.722857	1.12534	1.08319	1.99892	1.90534	0.827609	1.79032	1.01864	1.09961	1.25769	2.29426	0.825491	2.34258	0.647501	0.92081	1.08162	0.788519	1.3137	2.00602	1.31719	1.36416	0.75815	2.0819	3.56303	0.955932	4.07913	1.54626	2.03509	1.29467	3.70727	2.06624	1.51784	1.86095
0.472657	0.467028	0.269469	0.372564	0.210779	0.702691	0.356443	0.354371	0.368949	0.21139	0.203277	0.351766	0.552608	0.54336	0.257308	0.241097	0.143104	0.176716	0.133552	0.229253	1.36398	0.710025	0.783822	0.553281	0.318786	0.353033	0.326808	0.374883	0.085419	0.317904	0.259323	0.432563	0.4281	0.181528	0.468121	0.579845	0.41813	0.633312	1.02733	0.613535	0.416354	0.441638	0.212224	0.415991	0.649098	0.800769	1.22363	0.455643	0.406653	0.646287
3.22206	17.2028	16.208	2.77177	4.78721	5.0005	124.353	1.3513	2.75832	2.79955	2.50194	8.07037	28.7133	88.9917	12.0646	13.5399	1.80649	16.4506	1.20766	17.519	1.05678	15.0896	2.16141	6.76361	0.56654	2.26578	7.51654	2.06945	1.77365	5.86648	4.79524	4.60596	1.99275	2.18747	18.134	3.34336	0.930406	10.2095	1.61956	3.75968	3.86713	0.612595	8.24334	1.2051	0.749008	2.24982	0.749288	12.8655	0.408831	0.621736
0.318471	0.353782	0.284261	0.159193	0.406686	0.275809	0.354283	0.329402	0.323992	0.152488	0.190534	0.112358	0.245912	0.214754	0.205482	0.273988	0.1803	0.422887	0.190672	0.210935	0.215345	0.305782	0.862664	0.443262	0.333756	0.380604	0.310694	0.392234	0.193285	0.256384	0.202049	0.395523	0.327622	0.336836	0.260329	0.266014	0.641849	0.475195	0.237586	0.452878	0.419534	0.528681	0.536423	0.265506	0.427369	0.464231	0.221695	0.311526	0.385312	0.33248
1.76354	1.82565	2.98882	1.6822	2.31182	2.07857	2.97088	1.85099	1.70022	1.33009	1.74862	1.35243	2.06573	1.95542	1.73118	3.59958	1.66564	2.72331	0.911328	1.16191	1.11606	1.53619	1.60542	2.13872	1.53889	1.04019	2.78753	2.44612	1.27304	1.8595	2.57672	2.17879	1.75125	2.59316	1.68925	4.13565	1.93791	2.0141	3.34717	1.21783	2.84957	1.47558	4.5108	2.33683	1.78006	2.50891	3.30153	3.28095	2.52519	1.90821
0.182705	0.490268	0.272747	0.169978	0.0561262	0.408914	0.180274	0.226475	0.349382	0.272777	0.309416	0.377045	0.275778	1.01976	0.223494	0.13508	0.231123	0.171148	0.148779	0.218837	0.236849	0.282064	0.787402	0.415075	0.374672	0.260396	0.416736	0.340124	0.115717	0.0959325	0.35591	0.321244	0.385996	0.293281	0.383274	0.261972	0.608643	0.343844	0.445613	0.354534	0.248855	0.581226	0.420274	0.216661	0.316536	0.319285	0.40868	0.387988	0.310839	0.500025
0.466027	0.517598	0.314752	0.322695	0.250752	0.285722	0.537201	0.388018	0.394882	0.347451	0.426676	0.364432	0.382088	0.415887	0.582072	0.507357	0.503271	0.473709	0.516929	0.446528	0.385416	0.603064	0.759129	0.550995	0.388199	0.432882	0.584453	0.650745	0.547555	0.353033	0.475783	0.611733	0.488974	0.590284	0.430422	0.358333	0.401365	0.569476	0.322945	0.368338	0.573954	0.683994	0.619387	0.479547	0.657852	0.649056	0.643708	0.528095	0.704771	0.679902
1.75451	2.75885	1.82093	0.986485	3.00897	4.57645	1.65692	2.23075	4.10779	1.51426	1.52537	1.91883	2.56753	2.68788	1.53617	1.19629	1.99477	1.82458	1.02538	1.75079	1.41858	3.84615	2.99527	3.23593	1.69526	1.60005	2.63859	1.59434	0.813537	2.08108	2.63831	3.23887	2.12617	3.54296	3.28429	2.31422	1.11586	2.54861	2.29421	1.62025	2.06582	1.19399	1.01238	4.64835	4.73462	2.13552	5.22357	2.22673	5.18538	4.15489
1.63441	2.36496	1.34081	1.47189	1.79157	1.95614	1.99227	1.7798	1.23798	1.44663	1.69022	2.05335	1.74996	1.85505	3.35379	1.94882	1.74795	2.6666	1.69256	1.24682	2.14763	2.19048	1.93791	1.77825	1.54007	1.44155	1.45419	2.36815	1.48152	1.75722	1.98681	1.62882	1.64217	1.98973	1.65843	2.46008	2.48299	1.54586	1.63404	2.78033	2.96261	1.51764	4.94315	2.14229	2.25119	2.95692	2.58391	2.83768	2.42895	2.15489
0.990295	1.54808	1.30225	1.72622	1.14172	1.9791	1.1697	1.15874	1.03585	1.44409	1.37918	1.20985	2.19717	1.16047	1.34673	1.22699	1.25991	1.17948	1.42385	1.57838	1.02196	1.35794	1.08185	1.03623	1.2807	0.834446	0.951384	0.77991	1.31825	1.6358	1.80786	1.48381	1.52604	1.08146	1.33686	0.994135	0.572541	0.856898	1.08389	0.641108	0.886603	1.24128	0.916254	1.16772	0.932836	1.13377	1.15522	1.0119	0.967305	0.976562
0.507717	0.395585	0.409366	0.595805	0.387597	0.345066	0.380967	0.353707	0.442635	0.574812	0.253184	0.399505	0.575705	0.354334	0.439522	0.640533	0.599592	0.433219	0.536567	0.577367	0.613685	0.258491	0.252487	0.386832	0.20394	0.477532	0.359712	0.437541	0.411015	0.773455	0.323761	0.33695	0.27767	0.331071	0.26293	0.422369	0.244564	0.397772	0.257288	0.451365	0.288834	1.09641	0.413479	0.30792	0.437139	0.222931	0.310049	0.235738	0.27915	0.296428
1.41737	2.45749	1.24719	0.69377	1.21775	3.36349	1.20153	1.68535	1.43587	0.356748	1.47039	1.1482	1.36258	1.75886	1.96955	2.17993	1.63599	1.64276	1.40657	1.86975	0.894454	1.07825	1.23853	1.01877	1.21792	1.06007	1.20985	1.02873	1.62196	5.15996	1.47245	1.522	1.58208	1.22785	1.77217	0.46322	0.611845	0.823181	0.989805	0.806582	1.14691	0.607017	0.882457	1.14574	0.892777	1.3506	0.974469	0.783269	0.812282	1.73061
0.877039	0.774174	0.857486	1.1531	1.00093	1.09479	0.696233	0.733245	1.0822	0.983091	0.93791	1.10813	1.19903	0.847099	1.11888	1.26541	1.00932	0.937647	1.06178	1.22772	1.08329	1.07436	0.902283	0.802182	0.699741	0.849834	1.36043	0.91617	1.12902	1.01866	0.896941	1.15978	0.842105	1.16532	0.876655	0.672857	0.635082	0.541976	0.724008	0.924471	0.911245	0.533248	0.775194	0.975419	0.749344	1.02745	1.03435	0.757691	0.965065	0.835003
0.667557	0.307088	0.516823	0.426894	0.29577	0.291528	0.0949758	0.503652	0.661594	0.795229	0.338135	0.781006	0.549783	0.527343	0.519346	0.38622	1.06776	0.557631	0.541888	0.413959	0.511745	0.467946	0.698812	0.963298	0.324097	0.496032	0.715256	0.555432	0.364206	0.443125	0.637308	0.647375	0.279096	0.379694	0.569963	0.665868	0.665823	0.847242	0.209363	0.503702	0.648845	0.755972	0.535246	0.622781	0.967212	0.819605	0.976849	0.786596	0.958405	0.721813
0.83612	0.691228	0.446628	0.805283	1.07491	0.743052	0.916674	0.764467	0.660589	1.19103	0.885034	0.767872	0.883314	0.641766	1.01551	1.22784	1.04093	1.04491	1.26714	0.867528	0.992162	0.788395	0.940203	1.09542	1.08756	0.796749	1.09714	1.41768	1.60074	0.77821	1.2337	0.787402	0.874202	0.910249	0.605877	0.481162	0.584112	0.897747	0.900495	0.770832	0.805607	0.723066	0.869263	0.867378	0.943931	0.803665	0.790514	0.870928	0.858664	0.642591
0.475941	0.668003	0.761615	0.495737	0.156791	1.28337	0.351296	0.601287	0.306298	0.403926	0.242937	0.560821	1.60023	0.51398	0.529465	0.964692	0.0870473	1.46914	0.180226	1.07522	0.293152	0.498579	0.305801	0.33592	0.354736	0.22804	0.117345	0.314268	0.338753	0.602882	0.312891	0.482369	0.401784	0.259686	0.437464	0.174161	0.206509	0.314199	0.261904	0.1947	0.188882	0.533476	0.360088	0.355189	0.263123	0.204495	0.219385	0.266454	0.14655	0.254524
1.86699	1.03373	0.859845	1.03316	1.44175	1.6192	1.21104	0.833403	1.48355	1.40568	1.09838	1.28437	3.96165	1.59304	1.8837	0.921999	1.21953	1.20356	1.10549	0.769053	1.59357	1.92764	1.65164	2.74003	1.46441	3.29066	1.65571	1.46304	1.07756	1.07559	2.81144	1.58657	1.5269	1.85079	1.80855	1.36719	1.2346	1.95084	1.54681	1.11438	1.53078	1.16974	1.60821	2.5271	1.91655	1.66038	2.50213	2.36189	2.56102	2.01446
0.958681	0.547795	0.404973	1.22554	1.72414	0.907771	1.1102	0.668673	0.971157	1.79811	0.98629	1.02435	0.77688	0.634921	0.776759	0.963113	1.63092	0.763359	1.55596	0.858885	0.861401	0.530054	0.694879	0.773754	0.649646	0.879817	0.950299	0.877578	1.68589	1.00741	1.00919	0.847314	0.783822	0.970874	0.690083	0.617132	0.523505	0.666578	0.716897	0.9997	0.758725	0.624259	0.558472	0.772738	0.777303	0.707464	0.721709	0.715768	0.669792	0.512899
0.279564	0.224861	0.330153	0.409299	0.186071	0.485508	0.132524	0.389605	0.480423	0.316596	0.256693	0.199215	0.262888	0.357028	0.349406	0.242483	0.352373	0.219183	0.315179	0.42613	0.307012	0.201824	0.267838	0.266241	0.278552	0.195814	0.247378	0.271621	0.261958	0.40404	0.37853	0.245339	0.179598	0.250532	0.137148	0.081367	0.201422	0.188832	0.193821	0.302096	0.212513	0.176004	0.43247	0.247341	0.190727	0.309981	0.369099	0.193233	0.154109	0.256937
1.73768	1.64058	1.50403	1.52837	1.15501	1.68124	1.6728	1.69857	2.27599	1.47226	1.19014	2.00481	1.27327	2.1535	1.61223	0.868131	1.33982	1.65599	1.09509	1.66697	1.49799	2.73905	1.54378	2.64676	2.10363	2.6441	1.88672	1.42562	1.3525	1.48392	1.4956	2.22896	1.98063	2.10287	2.44612	2.1522	1.09485	1.80584	2.1378	1.22076	1.89966	1.50621	1.32896	3.44234	2.48756	1.86296	3.22196	2.2308	2.90251	2.78606
2.53197	1.07139	1.13344	1.06039	5.67762	4.4236	1.04359	1.14082	7.86596	1.84655	3.14515	4.69726	2.31016	5.04363	3.20123	1.08515	3.7312	8.61104	1.95191	1.03835	2.60974	6.33352	2.58371	10.1946	2.23159	3.4954	2.57951	2.51408	1.59622	2.6617	1.54931	10.0975	7.66401	10.1641	11.7505	2.4423	1.64631	3.4668	1.14159	2.74884	3.12911	2.217	0.749288	11.9611	16.1321	3.72232	9.63856	4.41345	20.0815	5.19805
0.700673	0.588374	0.544366	0.424304	0.379766	0.496475	0.633152	0.621968	0.642756	0.538735	0.537663	0.3632	0.572508	0.66921	0.597264	0.563825	0.620309	0.493559	0.634518	0.71286	0.448491	0.644745	0.783883	0.743218	0.616485	0.532964	0.832016	0.748503	0.734268	0.493974	0.488353	0.704077	0.702938	0.756487	0.460617	0.405268	0.583465	0.711693	0.52776	0.688279	0.763301	0.919794	0.872448	0.711288	0.763126	0.764526	0.868206	0.584351	0.729714	0.806257
0.957763	1.11053	0.702445	0.695314	1.00462	0.641725	0.912742	0.808473	1.13017	1.30811	1.16316	1.04142	1.16087	0.905551	1.17625	1.09056	1.1411	0.967212	1.42501	1.18157	1.12839	0.873744	1.04967	0.979336	0.658068	0.890551	1.10286	0.906454	1.09709	0.788022	0.90703	1.02588	0.961169	1.04852	0.998004	0.64	0.779666	0.762079	0.673355	0.684275	0.955019	0.573099	1.02525	0.883392	0.903751	1.05659	1.09925	0.871232	1.05474	0.945627
2.08091	9.49217	1.94609	1.53586	1.82056	2.0139	1.18833	1.47018	1.667	0.647626	2.39378	1.72348	1.89814	2.59356	3.99074	1.33025	2.18098	1.84485	1.48967	2.11515	2.85112	3.27794	3.15278	3.90457	2.96252	2.33106	2.76985	5.47555	2.01731	1.83533	2.14528	1.89948	3.49455	2.07753	2.82175	1.88915	2.55083	2.19655	2.61342	3.70576	3.04118	2.43356	6.9667	3.56748	2.88517	11.5727	2.47531	2.86623	1.85515	2.21823
2.83608	2.71223	2.04675	1.33572	1.40219	1.54885	1.66845	0.779788	2.60974	1.32058	1.42383	2.58051	1.89948	2.1302	2.90732	1.85038	1.48262	2.36089	1.8457	2.15179	1.29463	1.516	1.49109	2.08026	1.44111	2.17467	1.58098	1.63383	2.61732	1.55308	1.20296	1.33472	1.4408	1.14224	1.6856	2.21956	1.23303	1.51389	1.68231	1.52283	2.45773	1.47901	2.60383	1.51229	1.30263	2.10571	1.9216	1.37069	1.25823	1.07302
5.67312	4.55394	2.16586	3.48384	2.90082	2.57845	1.6279	3.59919	3.88908	0.968336	2.93755	4.11794	2.83656	7.07014	1.02043	2.49931	3.96087	1.10813	2.44559	3.27643	3.86713	2.61547	1.65662	2.62171	5.01203	4.02901	2.38783	5.81767	2.52576	3.89955	4.9317	4.34462	5.96979	3.0292	13.3032	1.7041	3.72842	4.04138	5.85103	3.53357	7.30727	3.79118	0.832016	4.3691	4.85295	4.60066	2.18665	1.73741	2.59882	3.57769
0.324528	0.266113	0.204843	0.262329	0.32714	0.309885	0.390717	0.275809	0.15031	0.468494	0.370192	0.301878	0.426494	0.242377	0.236446	0.316736	0.362766	0.208069	0.958773	0.402852	0.317864	0.56443	4.89836	0.542241	0.912825	1.14914	0.334739	1.32673	0.891266	0.250677	0.29634	0.259707	0.490412	0.200525	0.210062	1.509	0.770297	1.75719	1.06033	1.46203	2.67458	0.468077	0.877116	0.714133	0.929023	5.36394	0.972857	1.33529	0.529269	0.579139
0.773874	0.540833	0.565483	1.27882	0.834516	1.47382	0.892618	1.58667	1.15031	0.748671	1.05681	1.1937	0.992556	1.21736	1.6512	0.69483	0.86423	0.913743	0.805867	0.686766	0.634357	1.04771	2.16029	1.4744	1.2032	0.949397	1.00308	1.0403	0.742501	1.34387	2.17628	1.2115	1.0276	0.846239	0.930406	1.72322	0.580956	1.23893	1.78852	0.711592	0.90629	0.708416	1.53337	1.80982	1.38301	1.55381	3.27375	1.56929	1.90382	1.0595
1.94966	2.18079	3.10607	1.73349	2.95125	2.87002	2.24967	1.0712	4.44069	1.89735	1.73403	1.71524	2.72814	3.40402	2.22628	1.70149	1.8524	3.07958	0.793462	3.19081	1.52847	3.73343	2.54816	2.94022	3.6523	2.58799	2.57752	1.50632	1.09335	1.91928	2.37801	3.56646	3.25298	2.95762	3.9703	2.16713	1.69883	2.59626	3.60088	1.68206	3.1409	2.30017	2.46142	4.96549	4.42929	2.528	4.49681	1.77607	5.1398	3.87687
5.35705	4.8572	2.64866	3.78272	3.04553	5.6427	3.16756	2.11492	4.80977	4.3611	4.26221	3.79608	2.45592	9.7924	1.23675	1.31408	4.29775	1.3153	3.58282	2.54356	1.96002	4.02059	3.22664	5.08725	4.80885	4.50572	2.99886	7.40905	2.67774	2.59875	3.98708	2.39642	7.4217	2.44499	12.4332	3.8915	13.9171	2.96314	7.97067	14.9495	6.03755	5.10048	1.16644	7.32547	9.07112	4.62599	3.34706	7.25111	3.58616	3.57296
0.591751	0.503474	0.364591	0.330077	0.366757	0.375178	0.484308	0.470566	0.575772	0.367121	0.62461	0.361324	0.512899	0.662033	0.599413	0.593613	0.537374	0.53674	0.63008	0.643501	0.397994	0.735889	0.772678	0.639304	0.460384	0.477281	0.846812	0.772798	0.679486	0.378415	0.509347	0.775434	0.753352	0.712149	0.574218	0.351617	0.647082	0.578269	0.286098	0.423657	0.786658	0.611621	0.667111	0.652486	0.70368	0.78284	0.812018	0.532879	0.776518	0.904077
0.65716	0.497142	1.04167	1.78259	0.993542	2.62605	1.09257	2.34847	1.49999	0.775074	0.915751	1.74007	0.677323	1.45132	1.25731	0.962186	1.3747	1.07058	0.834376	1.05844	1.20512	1.11491	2.53062	0.818197	2.99832	0.844452	1.23831	1.31839	0.782718	1.15138	1.82622	1.83231	1.41353	1.74031	1.04704	1.2182	1.33103	2.67508	1.15327	0.735727	1.34153	2.83873	1.33332	1.62681	1.53339	1.36186	1.45762	1.44655	1.2287	1.76373
1.38504	0.988924	0.978378	1.23818	1.72452	0.861178	1.04195	1.09641	1.44096	1.14164	1.37285	1.03224	1.30293	0.873363	1.01264	1.40605	1.52702	1.21826	1.81133	1.42717	1.28573	1.01933	1.04219	1.12002	0.994036	1.20305	1.11794	1.28287	1.52096	1.13305	1.09771	1.21542	0.959509	1.16607	1.06668	0.813339	0.6222	0.90967	1.05044	0.953562	1.01562	0.571037	1.02214	1.10969	1.21953	1.13237	1.23347	1.154	1.15287	1.1795
0.877886	0.807689	0.653339	0.893096	1.22728	0.511561	0.704126	0.54401	0.957396	1.02449	1.3438	1.08308	1.42843	0.974659	1.20948	1.46088	1.33028	1.02981	1.40584	1.17064	1.12445	0.809782	0.766166	0.666489	0.645453	0.847458	1.33822	0.994926	1.51341	0.861104	0.871992	0.958681	0.838926	0.819941	0.694541	0.590423	0.564143	0.80109	1.53558	0.525624	0.761093	0.663262	0.912659	1.00021	0.965904	0.795292	1.25376	0.630795	0.779849	0.927816
1.30521	1.04619	1.2471	1.28231	2.25887	0.712251	1.63773	0.846525	1.27899	1.0264	2.01179	1.43453	1.44115	1.17888	1.47401	2.68133	2.33274	1.64064	2.08242	1.73626	1.77573	1.20343	1.19815	1.08575	0.981643	1.36745	1.47178	1.75543	2.3855	0.991473	1.49988	1.66728	1.50557	1.31203	1.19073	1.08308	0.547166	1.05812	1.09902	0.858664	1.15722	0.470655	1.08561	1.16032	1.41985	1.22178	1.39507	1.54314	1.14837	1.31099
5.67924	6.39591	3.49956	2.99572	3.87657	3.53907	6.09422	3.15876	4.56913	2.18876	4.10189	6.54793	5.30757	7.31582	2.4335	1.65744	4.27643	2.92509	3.00499	2.61698	7.37517	5.05153	4.58547	4.66135	6.2818	6.55824	4.20274	5.82887	3.76946	2.39768	2.86467	6.09607	6.64673	6.57852	5.55895	3.9248	5.20156	4.99201	5.00125	7.48223	5.6638	3.68338	2.85935	7.46882	6.43998	5.87648	4.7061	4.76077	5.95061	7.11794
4.20256	1.82929	2.13598	2.65301	2.9423	1.52952	3.28655	3.13126	2.87175	1.82279	2.29959	1.62668	1.82989	3.13962	2.4703	1.71718	3.73552	3.08509	2.78575	0.750751	8.32155	4.03193	9.49217	3.66421	4.09668	3.94431	4.85885	10.1381	1.24693	1.47048	1.62906	3.15916	3.33378	4.74473	2.93419	2.63741	5.25127	6.47417	2.20056	6.60633	6.25469	7.29661	2.39177	4.76281	5.61798	2.07005	4.86168	3.85252	6.32391	4.90172
0.26411	0.27154	0.332149	0.319673	0.342747	0.363597	0.265597	0.759129	0.32533	0.241733	0.314228	0.427862	0.195164	0.196974	0.367161	0.202655	0.321616	0.586098	0.328009	0.539694	0.302462	0.222529	0.83633	0.596374	0.377302	0.423711	0.557196	0.561608	0.913159	0.777061	0.334549	0.376889	0.395679	0.342701	0.488926	0.391328	0.369031	0.464016	0.308299	0.52997	0.550539	0.527983	0.318969	0.590842	0.398645	0.894454	0.608347	0.887863	0.422762	0.412575
1.06022	0.495221	1.10841	1.73421	1.58013	0.647375	0.668092	1.00703	1.22094	0.829669	1.40396	1.31607	1.4425	0.554262	1.41961	1.51904	1.70239	1.05868	1.38616	0.962094	1.04504	0.876578	0.997805	1.11941	1.20347	0.872372	1.06043	1.05916	1.71892	1.10286	1.27112	1.15907	0.961631	1.06404	1.04373	0.337861	0.569444	1.0397	1.03452	0.766049	1.04067	0.342994	0.865876	1.24933	1.00924	0.749288	1.0232	0.739153	1.09199	1.2085
2.47733	2.1462	1.68226	2.22588	1.66756	2.57235	1.88111	2.14325	1.89175	0.920217	2.24967	1.51355	1.64039	2.0213	2.25139	1.90313	2.10739	1.64791	1.83675	1.72203	3.05979	2.68911	1.97208	1.91124	3.44068	2.37248	2.1195	2.2097	1.45275	1.58952	1.83258	3.83494	2.68796	4.32133	2.51048	1.77371	1.72176	2.26979	1.53608	1.91608	2.62653	2.34307	1.58879	2.61787	2.714	2.34203	2.07796	2.61554	3.28127	3.53995
2.89394	3.02865	2.15778	1.94307	1.77245	2.16718	2.23	2.8259	2.16226	1.08047	2.39762	1.9497	1.84088	3.22539	2.99052	1.85546	2.36005	2.72368	1.90168	1.54665	3.84497	2.97433	2.81889	1.999	3.97947	2.40604	2.27392	3.55088	1.24344	2.01029	1.69523	5.0997	3.52423	4.67246	3.37132	2.37693	2.40883	2.64817	1.83278	3.47838	2.56568	2.9274	1.84379	3.19949	3.33778	2.62481	2.04721	2.88892	3.77929	4.16858
0.492393	0.408948	0.694975	0.373566	0.455996	0.355707	0.541477	0.595167	0.358359	0.200924	0.331983	0.164894	0.316155	0.344697	0.699643	0.327214	0.504796	0.699741	0.493267	0.383966	0.411032	0.432844	0.521213	0.506791	0.479295	0.362476	0.307295	0.526011	0.364711	0.476667	0.554631	0.407349	0.366946	0.422762	0.358436	0.48158	1.10506	0.32307	0.336598	0.651211	0.640985	0.450187	2.22301	0.61267	0.52378	0.459812	0.59011	0.706564	0.551146	0.453679
0.776458	0.73373	0.919963	0.5001	1.08035	0.640246	0.633192	1.06818	0.892459	0.3641	0.851426	0.936067	0.566059	0.721501	0.826173	0.46307	0.855432	0.898796	0.813405	0.541389	0.842034	1.25729	1.15287	1.52026	0.830979	1.18457	0.623247	1.15219	1.58539	0.69735	0.846812	0.753069	0.755687	0.776156	0.693866	1.43078	0.601106	1.39067	1.08241	1.15931	1.48381	0.734538	1.89631	1.07544	0.989315	2.05931	1.51119	0.9995	1.24071	1.01673
0.143143	0.419375	0.352398	0.457415	0.0997506	0.657722	0.151826	0.542564	0.212022	0.151208	0.134649	0.132498	0.318847	1.50975	0.151609	0.206629	0.172685	0.0793273	0.227562	0.11271	0.0888573	0.0557756	0.355038	0.128818	0.623053	0.0669972	0.20803	0.173668	0.128828	0.413753	0.338558	0.0948767	0.087535	0.0671817	0.139489	0.163084	0.16509	0.144227	0.124202	0.125357	0.72469	0.202552	0.179769	0.104417	0.0720461	0.0860363	0.0684369	0.145868	0.063012	0.0507949
0.442635	0.368718	1.0926	1.52672	0.162758	0.19163	0.204633	0.615764	0.73443	1.39663	1.25083	2.31546	1.49723	0.538706	1.17851	2.30707	0.605804	0.224391	0.389681	0.770535	0.145433	0.705268	0.148289	0.480677	0.363029	0.64487	1.43326	0.104196	0.99681	0.760572	3.62411	1.63436	0.435996	0.583124	1.25646	0.0966651	0.277554	0.326733	0.0956938	0.131512	0.417851	0.374294	0.0442615	0.459812	0.423585	0.0857633	0.154445	0.109463	0.167015	0.361063
2.6708	0.451732	0.660982	0.77688	0.282191	0.455145	1.16094	1.64171	1.13952	2.16873	0.96637	0.793336	1.04033	0.561482	0.852951	2.50897	0.532935	4.17694	0.32515	0.299913	0.321813	0.681199	4.51223	1.00341	1.25511	0.286459	2.90977	2.07125	1.52565	1.23553	2.80867	0.26571	2.00549	0.222138	0.732869	1.05339	1.49519	3.6985	2.71194	1.21272	1.77063	1.54464	3.43607	4.65463	1.38372	1.17112	3.43855	2.00807	2.09512	1.38053
0.308661	0.156568	0.197887	0.408147	0.271968	0.509996	0.239189	0.385178	0.278652	0.655824	0.407531	0.363425	0.386473	0.289469	0.513426	0.716076	0.609719	0.45405	0.67792	0.491328	0.366542	0.22979	0.355518	0.453289	0.337792	0.222891	0.385267	0.607829	0.444642	0.356557	1.1375	0.273149	0.297787	0.247182	0.264299	0.189229	1.64196	0.27274	0.192348	0.217292	0.300607	0.492975	0.234022	0.237654	0.373274	0.285209	0.307371	0.310328	0.240976	0.304655
1.13928	0.963762	1.87098	1.02874	1.48065	1.3594	1.57418	1.21024	1.08222	0.846239	1.00189	1.12279	1.2406	1.01572	1.11474	1.08861	0.810964	1.67322	1.00422	1.05557	1.11292	1.07853	1.54595	1.11344	1.34597	0.727061	1.18721	1.16244	0.672179	1.80989	1.40325	1.15162	1.12423	1.37884	1.08593	1.53702	4.22636	1.25511	0.72812	1.76985	1.99892	1.31614	3.45125	0.943574	1.21334	1.04977	1.50026	1.71474	1.46454	1.13759
0.656039	0.899119	1.10715	0.876347	1.03728	0.738443	0.906372	1.01631	1.51144	0.450735	1.20166	1.13043	1.30579	1.09961	1.69509	1.05325	1.12334	1.17891	1.32631	1.60349	0.78796	1.58361	1.42635	1.16284	0.750469	1.41949	1.22787	1.26756	1.24182	1.24716	1.19062	1.55017	1.04172	1.58431	1.26719	1.53908	0.480954	1.32528	1.22504	1.38681	1.40702	0.514668	1.0181	1.32982	1.62978	1.62816	1.41419	1.52054	1.48765	1.13464
0.616637	0.28811	0.64041	0.417397	0.550691	0.74438	0.537548	0.704672	0.624493	0.330273	0.303187	0.289754	0.523259	0.415541	0.391543	0.432302	0.381374	0.745823	0.360516	0.609125	0.425967	0.483933	0.637511	0.695459	0.573888	0.320646	0.664761	0.47353	0.217009	0.980777	0.744602	0.453289	0.489021	0.539142	0.417641	0.366394	0.774593	0.630517	0.463199	0.702543	0.570646	0.461106	0.592347	0.445296	0.705268	0.360698	0.751089	0.920641	0.693818	0.48539
1.68014	1.31506	1.78533	1.75107	1.66795	2.90994	1.48122	2.46664	1.58645	1.42678	1.87129	1.1652	0.954472	1.81169	1.34201	1.30492	1.54957	1.77481	1.03047	1.49202	1.3842	1.74304	1.89261	1.97379	3.31972	1.65259	1.54945	1.79743	1.97507	2.07104	2.43066	1.87434	1.77702	2.38555	1.56622	2.49794	1.22052	2.68666	1.41026	1.22388	1.77806	1.72043	1.86293	2.01284	1.82246	1.74651	2.77169	1.93151	1.57503	2.77147
1.41733	1.79973	1.882	1.58028	1.23988	2.34836	1.74731	1.57114	2.16029	1.42118	1.46115	1.7165	1.50596	1.95061	2.36956	1.18528	1.33449	2.07022	1.32732	1.41115	1.27142	2.31777	2.0985	2.19366	1.90132	1.85998	1.49076	1.36342	1.40738	2.26552	2.35482	1.97507	1.52446	1.47793	2.23589	2.80962	0.880359	2.10526	2.06088	1.26931	1.999	1.20983	1.92593	2.09135	2.07409	2.55872	3.40669	2.35139	2.02253	2.17509
1.2823	1.11698	1.01293	1.09644	1.76885	2.54985	1.85577	1.01802	3.36406	1.63519	1.79404	2.0896	0.854701	1.54576	2.40177	1.37654	1.75617	2.24613	1.02559	1.36414	1.28179	2.52742	2.76243	2.80733	2.13931	2.44188	1.8206	1.50821	1.30837	1.77092	3.20031	3.17813	2.26968	2.65964	3.11808	2.02836	0.925926	1.90356	1.45199	1.31952	2.02487	1.40239	2.12816	3.22217	2.57918	1.26995	2.68528	1.63452	4.27753	2.45712
0.635687	0.561325	0.490509	0.556452	0.578135	0.673219	0.706015	0.484379	0.676224	0.631513	0.620848	0.41132	0.667289	0.641725	0.851064	1.12906	0.715871	0.853315	0.523725	0.722022	0.470057	0.590319	0.595274	0.776458	0.657895	0.819336	0.660066	0.806192	0.603865	0.645161	0.709774	0.591611	0.612745	0.516369	0.548336	0.585754	0.470146	0.560821	0.486997	0.3429	0.520969	0.482253	0.618009	0.888494	0.602083	0.494144	0.696719	0.429812	0.603719	0.774174
1.8797	1.13099	1.07699	1.13806	1.90194	1.3934	1.4191	1.35895	1.65254	1.03011	1.78492	1.43806	1.36788	1.42009	1.2462	1.54969	1.25796	1.87719	1.29051	1.12966	1.77955	1.31688	1.60008	1.50734	1.05809	1.11663	1.67898	1.52423	1.2115	1.8686	1.35822	1.93054	1.43117	2.43795	1.82475	1.45571	0.95813	1.29914	1.30727	2.72941	1.46133	0.622937	1.6214	2.40506	1.60424	1.50177	1.09353	1.75559	2.57347	1.91659
0.665336	0.12219	0.68526	0.71772	0.904568	0.705467	0.218174	0.475466	0.551238	0.991768	0.808473	0.982029	0.423747	0.673401	0.820143	0.697301	1.19195	0.707814	0.823045	0.165511	0.648004	1.20855	0.60868	1.18044	0.434745	0.399457	1.02142	0.843882	0.732815	0.598015	0.941354	1.12473	0.697593	0.856678	0.956846	0.295534	0.743992	1.04129	0.441833	0.704275	0.738989	0.923958	0.108982	1.12784	1.11445	0.910664	1.37187	0.82149	0.832085	1.223
0.948767	1.11951	5.48125	0.560915	1.02834	0.708918	1.23528	0.747831	1.29242	0.722439	1.01567	1.04481	0.785793	1.19016	1.29226	0.758783	0.729395	1.10044	0.775014	0.798914	0.945537	1.43517	2.93971	1.75988	0.905797	1.52966	1.17359	0.995322	0.98629	0.85237	0.779362	1.23657	0.939496	1.23104	1.37172	2.10093	0.728491	1.99001	1.96707	0.880592	1.07088	0.902609	1.66722	1.6239	1.34956	1.56057	2.26214	1.35988	1.84928	1.41145
1.148	0.719839	0.7249	1.3747	1.79714	0.704225	1.01398	0.488353	0.940822	1.61954	1.41943	1.32998	1.02954	0.851281	1.07574	0.853534	1.26924	1.17705	1.62959	1.30127	1.02486	0.975134	0.876271	1.10024	0.800897	0.747999	0.820143	1.03044	1.8403	1.04886	0.915583	1.02687	0.662822	1.02896	1.05294	0.849834	0.6141	0.696524	0.691754	0.788457	0.725953	0.963762	0.974754	1.03827	0.63597	0.806907	1.1473	1.11	0.983187	1.0021
2.12332	2.06224	3.21141	3.07418	2.07995	4.02966	1.55606	3.96621	1.66672	0.95338	1.25568	1.91084	2.95133	1.99844	2.35571	2.86041	1.51055	2.03463	1.48139	1.91245	1.70175	2.42801	2.85234	2.45622	3.47971	1.93128	2.62467	2.40344	1.20633	2.59316	2.37547	2.92535	2.35966	2.15142	2.17009	4.14388	1.47044	4.39773	3.24707	1.55145	2.06139	2.63532	4.49256	2.0765	2.33536	6.0831	3.56646	3.18573	3.07125	2.64971
1.2369	1.15555	1.09992	1.12782	1.38735	1.43767	1.03803	0.96965	1.02478	1.36517	1.42519	1.38537	0.978282	1.11383	1.52121	0.89222	1.25876	1.83898	1.17043	1.61023	1.18092	1.06911	0.931012	0.849329	0.861549	1.49811	1.06368	0.949487	0.98561	1.73187	1.91051	1.69932	0.979816	1.14264	1.10102	0.746491	0.626292	0.724638	0.78703	0.641643	1.0162	0.539665	0.760977	0.926784	0.888731	0.726164	1.36584	0.895416	0.788457	1.30507
1.6946	1.11371	2.13338	1.44883	2.45459	1.5556	2.26639	1.39493	1.33709	1.12211	1.28561	1.51828	1.51416	1.35628	1.62435	1.57858	1.20301	2.2979	1.42782	1.65549	1.57082	1.6794	1.78907	1.37587	1.64385	1.13277	1.82618	1.55683	1.10453	2.56515	1.77076	1.61374	1.36385	1.81251	1.39386	2.39469	2.47078	1.4625	1.25576	2.16015	2.57235	1.29099	3.97251	1.52672	1.53414	1.65123	2.36776	2.7587	2.12562	1.61212
0.714286	0.754717	0.67595	0.637958	0.755344	0.666311	0.854847	0.615006	0.611023	0.686153	0.598982	0.856458	0.624415	0.77918	0.608828	0.85859	0.804117	0.723013	0.768876	0.62905	1.13131	0.576336	0.559159	0.631074	0.572115	0.556731	0.563507	0.527009	0.974184	0.688279	0.795292	0.574251	0.567569	0.642963	0.449095	0.427862	0.364884	0.493462	0.70205	0.535303	0.662603	0.23695	0.765931	0.628536	0.630795	0.629604	0.626056	0.612445	0.640656	0.689703
1.01803	0.980488	0.835841	1.0236	0.807298	1.28796	1.17891	1.10972	0.93835	0.88269	1.22693	0.791452	0.71623	1.22632	0.750976	0.924471	0.906783	1.34073	0.890789	0.730247	1.24556	1.18071	1.05119	1.33456	1.76426	1.09553	1.02584	1.11825	0.780945	1.05371	0.72982	1.08788	1.25598	1.10535	1.48969	0.83717	1.38667	1.18252	1.04903	0.854555	1.43637	1.14763	0.827883	1.07461	1.36659	1.43068	1.32959	0.985902	1.25951	1.30068
2.57341	1.06508	1.21281	1.17276	1.18971	1.08348	1.31365	1.41111	1.16683	0.513215	1.30297	1.44691	2.19809	1.00482	3.5387	1.00418	1.42027	2.57215	0.954198	0.847673	1.16003	1.05978	1.41279	0.828089	2.53011	1.04733	0.8047	2.8001	3.48008	1.21203	1.15141	2.45869	1.6723	1.9108	1.4655	2.6126	1.7445	2.75991	1.19194	2.59612	1.82963	1.34756	0.763417	1.65763	2.52525	0.9999	1.2711	2.07792	2.00409	2.27247
2.37473	1.51568	1.16355	1.10015	2.0528	1.45014	1.80744	1.74134	1.17004	2.40541	2.08173	2.57188	1.0945	2.54298	1.57644	1.55116	2.28535	1.87695	1.39383	1.29186	2.71532	3.88093	2.26727	2.4523	1.4074	1.34885	1.93558	2.14353	1.63361	1.19898	2.13593	2.61185	2.23115	2.94109	2.34077	1.23273	1.83496	2.6462	1.67269	1.84713	2.41295	2.07788	1.27649	2.589	2.39952	1.93915	2.9009	1.78945	1.9931	4.35692
1.06271	0.722491	0.58309	1.19004	1.13845	1.00119	1.05099	1.03916	1.11328	1.32582	1.26013	1.03603	0.992851	0.812216	0.845237	1.19811	1.40841	0.961538	1.51185	0.939585	1.29024	0.753864	1.01252	1.053	1.43511	0.792896	1.15015	1.31761	1.35834	1.24395	1.37044	1.00433	1.43414	0.951565	0.804182	0.708065	0.599628	0.956938	0.45731	1.06423	0.794786	0.803988	1.06911	0.954745	0.930319	1.00724	0.935716	1.31544	0.966838	0.884799
0.625078	0.278149	0.565931	0.768403	0.713878	0.811359	0.720409	0.525707	0.448009	1.0336	0.435028	0.512453	0.673038	0.448934	0.514853	0.846024	0.641849	0.664673	0.59609	0.539549	0.28978	0.549874	0.406421	0.562809	0.313048	0.597729	0.717875	0.744048	0.545494	0.539432	0.81215	0.526815	0.473776	0.538358	0.571102	0.319448	0.444879	0.340739	0.420239	0.35791	0.466679	0.0945269	0.573427	0.461574	0.377344	0.419657	0.657765	0.533504	0.422547	0.617093
1.0458	0.823181	0.697837	0.875734	1.11674	0.594354	0.871992	0.678196	0.964134	1.528	1.00592	1.03404	0.910581	0.755344	1.07478	1.53093	1.14569	1.17008	1.25846	0.977517	1.23802	0.821693	0.908678	1.00935	0.53087	0.793273	1.09591	1.17149	2.02257	0.860956	0.988826	0.957854	0.983091	0.880824	0.782656	0.689037	1.13716	0.91166	0.760572	0.725742	0.772798	0.913743	1.07313	0.735998	0.898069	0.85237	0.932662	0.853534	0.93985	0.812216
26.2653	1.05112	2.39596	2.35305	1.84512	1.68206	2.4286	1.5549	1.72565	1.63116	1.70952	1.33858	1.66019	1.73286	1.54428	1.87536	1.32259	1.48067	1.67909	1.07264	0.969932	1.97048	2.48657	2.10713	1.43606	1.30443	1.62164	1.88922	0.834516	1.41377	2.11846	1.57275	3.51741	1.42619	1.7135	4.29443	1.41201	2.97504	2.29027	1.52462	1.69676	4.30107	4.32807	1.40683	1.89577	1.96854	1.49837	2.25464	2.17424	1.88104
0.551086	0.598731	0.559284	0.379564	0.263985	0.648466	0.437675	0.519238	0.465311	0.198358	0.520752	0.356252	0.410071	0.493097	0.499875	0.200896	0.31347	0.373986	0.557103	0.719321	1.07461	0.352684	1.81778	0.562335	0.585926	0.403421	0.310039	0.575076	0.15058	0.301014	0.197977	0.493608	0.543331	0.587199	0.669031	0.465549	0.634397	0.706714	0.42757	0.466527	0.505408	0.732708	0.381534	0.508699	0.905141	1.07034	0.831532	0.998004	0.642013	0.788768
0.92115	0.373079	1.72697	0.58682	0.247653	0.71958	0.27137	0.658415	0.485295	0.407382	0.956938	1.64109	3.22445	0.383568	3.80735	0.759763	0.0690608	0.982415	0.516636	1.88537	0.0695024	0.866852	0.189663	0.191164	0.190531	0.628575	0.231096	0.164252	0.0485932	2.79142	0.8992	1.52607	2.98597	0.195164	1.14154	0.122129	0.219611	0.224401	0.393732	0.231594	0.135864	0.350447	0.107724	0.135101	0.12315	0.0916338	0.0768167	0.079713	0.0687994	0.0326041
0.966557	0.367809	0.382629	0.301796	0.863558	0.151724	0.204918	0.227355	1.02726	0.937295	0.944822	0.866401	0.429019	0.658718	0.168138	0.358757	1.25188	0.656728	1.2427	0.226865	0.501555	1.24225	0.640492	1.33065	0.341542	0.148511	1.06486	0.824606	0.223524	0.238027	0.629327	1.2308	0.744712	0.699301	0.950299	1.22276	0.505817	0.892061	0.497735	0.781616	0.729767	0.652742	0.114613	1.09579	1.34693	0.870398	1.36924	0.957579	1.07287	1.25351
1.46823	1.55817	1.58924	1.48216	1.33636	1.61194	1.50766	1.45773	1.96719	1.40125	1.41689	1.85563	1.58874	2.0903	1.39326	1.05387	1.49096	1.65235	1.36084	1.87347	1.51101	2.42043	1.70777	2.42913	2.04157	2.76152	2.06936	1.4743	1.4298	1.54128	1.38475	2.03401	1.60079	2.07456	2.30404	2.18713	1.09519	1.69538	2.48682	1.20244	1.97887	1.0195	1.56683	3.02984	2.22069	2.08359	2.95456	1.97468	2.24729	2.17325
2.3334	0.494218	1.67026	2.45875	0.753352	4.27296	0.830703	1.12182	2.00574	0.903587	1.40227	1.73816	2.61274	1.12501	2.79259	1.8679	1.1458	4.18971	1.42308	1.40938	0.698617	2.25301	0.969556	0.966277	0.754603	0.81182	0.741895	0.488854	0.376875	1.87154	0.68157	1.43166	2.036	1.27081	1.94856	0.489476	0.605327	0.388636	0.717515	0.706714	0.680272	1.19627	0.331774	0.631353	1.03364	0.543154	0.890948	0.508492	1.13991	1.52022
1.31716	0.881601	1.37197	1.0708	2.49289	2.65132	0.553281	2.10699	2.0345	1.70129	3.43371	2.19476	2.00457	2.26398	1.99164	2.00353	2.77739	2.14523	2.12251	0.707414	1.31912	3.29196	3.32956	2.89637	3.13126	1.61238	2.63477	2.0475	3.36746	2.68485	2.60004	2.54401	3.04238	3.07531	3.40646	2.47476	2.392	8.67152	0.775194	1.53948	2.63567	1.8443	0.77101	3.04794	2.49545	2.96648	2.79822	3.43855	3.75446	2.23634
1.17909	1.27967	0.693481	0.68292	0.82905	1.06555	0.951747	1.03232	1.08931	0.650491	1.08726	0.680921	0.618544	0.721449	0.868885	0.5449	1.07211	0.675128	0.828226	0.577467	1.15705	1.02665	1.03142	1.05462	2.65041	1.38702	1.11937	1.3193	0.883236	0.647585	1.07254	1.34702	1.12681	1.5029	0.896298	0.935979	1.23928	1.0209	0.613535	1.06967	1.21456	0.802697	0.998502	1.15549	1.21378	1.17963	1.06451	0.844452	1.43433	1.7706
1.84111	6.19272	2.18574	1.25723	0.567924	2.51073	1.31615	0.826037	5.04974	3.23457	4.35559	3.41052	1.16343	9.46522	0.79277	0.537924	5.78168	0.992851	0.620424	1.34807	5.35189	2.38101	3.75502	4.49418	5.08311	7.08316	2.81428	4.47908	0.798021	1.39094	4.47668	3.34426	6.33955	1.30834	13.3801	1.2108	8.85583	3.29761	3.90031	11.162	4.12354	2.1302	1.27218	5.69703	5.35332	3.18046	2.19077	4.40645	3.13136	4.29867
1.40813	0.821018	0.910581	0.722961	1.02462	2.24306	1.07645	1.09188	1.3376	0.895095	1.0655	1.03154	1.15776	1.37133	1.74441	1.15681	1.59408	1.37857	0.816994	1.32575	1.72076	1.31572	1.6199	1.25657	1.12324	1.11615	1.65047	1.41425	0.931619	1.5687	1.50035	1.65205	1.27384	1.66976	1.70019	1.19224	0.565067	1.94844	1.04678	0.861698	1.32751	0.662998	1.21253	1.51789	1.59663	2.14092	1.76221	1.36154	1.79475	2.0616
2.7835	2.5618	2.15188	2.29848	2.8422	3.60529	2.08381	2.35632	3.38146	2.90858	3.13962	3.21306	3.92065	4.30182	3.00526	3.00192	1.95	3.19336	3.12441	1.99665	5.44395	4.45514	8.64827	1.31167	1.50446	5.39607	3.10405	3.91988	1.46589	3.62661	3.75206	3.89772	3.13706	4.15991	3.61232	2.58485	2.48447	4.64749	3.67107	4.2889	5.07099	2.40229	1.82136	3.08957	3.78272	5.87959	2.23294	4.05778	3.55139	4.28229
0.216844	0.114848	0.124808	0.218837	0.14789	0.195741	0.0842957	0.130093	0.135551	0.216132	0.119857	0.0983091	0.57544	0.196475	0.411845	0.186331	0.0692137	0.189459	0.242137	0.434991	0.169918	0.117415	0.0374014	0.120623	0.164074	0.0560475	0.0726216	0.180619	0.0727008	0.301714	0.217708	0.24995	0.0769053	0.119131	0.169535	0.0524054	0.160645	0.0787402	0.0654922	1.70582	0.0282215	0.271444	0.0419094	0.0797003	0.1064	0.0179575	0.0556917	0.0378558	0.0906208	0.115761
2.15866	1.01093	1.66163	1.58874	1.06282	2.13383	1.67614	4.363	1.10392	0.623947	0.927558	1.23118	1.30169	1.31784	1.15001	1.42335	1.09855	1.67856	0.617093	1.1459	1.83456	1.4619	0.838785	1.79131	2.72911	1.2184	1.65904	0.718339	1.85498	1.02095	1.07589	0.948677	0.866626	1.3662	0.808538	1.32127	0.545346	1.05077	1.49	0.601649	1.44246	1.24794	1.15075	1.41521	0.581159	0.72223	1.59335	0.451855	1.27515	2.2686
3.22331	3.14703	4.43125	3.10463	1.15436	3.61624	0.643459	1.17236	1.8091	1.81861	3.03076	2.76893	6.45328	0.889284	7.40521	8.25696	1.12844	10.0653	1.40807	3.68555	0.0347198	1.53773	0.714388	0.973331	0.851426	0.801732	1.43873	0.535131	0.881213	6.66178	4.385	7.74233	2.96217	1.16689	3.74672	0.697593	0.527705	0.695362	0.984931	0.499251	1.11188	0.488711	0.720305	0.652146	0.393763	0.903179	1.45726	0.673673	0.48895	0.431667
0.536625	0.103188	0.128906	0.10865	0.0722439	0.1639	0.187347	0.119374	0.113401	2.07237	0.101111	0.0786102	0.282566	0.121439	0.189952	0.196641	0.0920556	0.113929	0.0844666	0.113805	0.122575	0.138167	0.209543	0.154595	0.123303	0.0925069	0.174262	0.159798	0.0564079	0.132725	0.192838	0.0885426	2.23634	0.105223	0.173515	0.108586	0.257341	0.176935	0.101	0.197231	0.203521	0.334627	0.332945	0.135417	0.141943	0.148058	0.17064	0.110596	0.163271	0.180734
1.02615	1.03158	0.738171	0.895576	1.10594	1.47239	0.853242	0.55732	0.746269	1.97824	0.84631	1.04965	0.886997	0.880824	0.814929	0.853752	0.912742	0.76266	1.15793	0.685495	0.903669	0.718184	0.786535	0.934754	0.752785	0.819471	1.41758	0.78604	1.43433	1.19366	0.805737	1.27629	0.617551	0.937822	0.597693	0.644371	0.537982	0.837381	0.688279	0.663086	0.636983	1.04492	0.648761	1.34687	0.639264	0.923361	0.77226	0.679163	0.652656	0.954198
0.659631	0.341962	0.477852	0.346633	0.3295	1.44413	1.82572	0.698568	0.531915	0.198302	0.307834	0.870777	0.506586	0.63861	2.68593	0.644787	0.492247	0.333834	0.350557	0.933881	0.283954	0.541126	1.70739	0.531152	0.570841	0.514827	0.516289	0.600024	0.438962	0.718804	1.53071	0.453721	0.601251	0.660807	0.344009	0.771724	0.518323	0.497611	0.786844	0.565004	0.583329	2.15652	1.48021	1.21455	0.586098	1.38529	0.973805	0.630795	0.60507	0.365377
64.4496	139.944	290.04	62.3597	127.812	124.643	163.572	229.048	279.494	72.7167	62.822	193.941	166.221	344.625	34.7331	14.3583	70.4771	85.2442	58.7337	87.3515	53.674	125.816	37.1733	184.659	317.239	159.264	59.1436	72.3118	42.084	47.4271	48.6997	62.1427	135.318	334.403	82.2639	5.54723	48.2486	29.1596	92.7214	57.4449	6.57549	146.54	29.2629	115.338	77.6337	37.9377	62.5704	62.818	118.552	61.065
1.07045	1.18181	1.05826	1.09427	1.69658	0.923873	1.32575	0.866251	1.14915	1.82385	1.53182	1.11024	1.37973	0.945895	1.08587	1.42444	1.33113	1.12987	1.79863	1.27858	1.23674	0.977899	1.12366	1.24519	0.918949	1.05397	1.16256	1.42402	1.61655	1.21887	0.937998	1.06415	1.13065	1.12101	1.00526	0.728385	0.899766	0.937207	1.1111	1.12222	1.19832	0.615612	1.2335	1.08771	1.11014	1.23741	1.21309	1.2741	1.22188	1.10763
1.77352	1.64417	1.53097	1.0866	2.30489	1.71718	2.42031	1.6544	1.66234	1.10229	1.86867	1.52586	1.84437	2.07538	1.37601	1.69771	1.50761	1.5898	1.59061	1.31177	1.8848	1.72265	1.66226	2.06118	1.37208	1.14496	2.20415	1.49716	1.21769	2.41523	1.73623	1.83449	1.61933	2.03335	1.73632	1.69857	1.55109	1.57642	1.58629	3.62476	1.59439	0.74096	2.33519	2.58987	1.75636	1.67932	1.19718	1.91011	2.35366	1.92508
2.04796	1.62467	1.22716	1.49169	0.842815	0.831878	1.30909	0.498778	1.63658	2.5565	1.7685	1.5647	2.24125	3.01241	1.06619	0.744712	1.0521	0.818264	1.14811	2.04023	1.25627	3.20544	0.4865	1.2591	1.04162	2.66766	1.22318	0.841751	0.716076	1.16044	1.15393	1.35071	1.04403	1.39416	1.91245	0.460363	0.587613	0.762544	2.7757	0.319683	0.828981	0.84538	0.618621	1.00716	1.27877	0.363319	1.10457	0.347427	0.531293	1.11245
1.51076	2.28133	1.2409	1.34005	1.85922	2.94742	1.05651	3.76336	2.72844	1.63795	2.12997	1.59574	3.46789	4.34858	2.36782	3.15527	1.01921	1.47191	1.38785	1.4385	1.58356	3.03095	1.35071	1.64791	3.67377	1.02188	1.2521	1.5672	1.77352	3.30994	1.62949	1.54064	1.25078	1.528	1.4205	2.09608	0.965437	2.07848	1.04429	1.37967	1.04244	1.20054	0.980488	2.01931	1.70436	1.28771	1.49361	1.49312	1.83123	1.77311
2.39831	1.80845	1.41898	1.79045	2.25571	3.03638	1.40355	1.50292	2.15424	1.54316	2.0263	2.15239	1.45402	2.1273	2.61445	1.80963	1.46512	5.34588	2.60654	1.63287	2.19394	2.63998	3.99824	2.42371	2.61842	2.02988	2.22489	1.78885	1.34755	2.63068	2.3328	3.03159	3.08318	3.27826	2.73958	2.58264	1.57252	2.39252	0.79783	1.92667	2.88884	1.18569	1.1243	2.89059	2.79963	2.78133	1.65862	2.96042	4.66222	2.53878
0.229111	0.259963	0.167873	0.430923	0.0902772	0.272799	0.377972	0.182163	0.141852	0.645494	0.640123	0.256713	0.489524	0.171034	0.340541	0.400336	0.0309301	0.173846	0.318036	0.33911	2.96833	0.401768	0.529773	0.228796	0.173762	0.214119	0.49434	0.1378	0.114973	0.156764	0.164177	0.156986	0.132273	0.2849	0.288359	0.464943	0.702938	0.126406	0.0823045	0.182375	0.156764	0.25101	0.463714	0.121403	0.101128	0.708567	0.135428	0.214041	0.0789827	0.0880282
0.159987	0.275164	0.246251	0.283294	0.0470677	0.32112	0.161418	0.363835	0.217122	0.231723	0.163103	0.082352	0.266248	0.163913	0.191468	0.585103	0.131105	0.343466	0.198468	0.116796	0.27359	0.191633	0.196082	0.218608	0.355051	0.223934	0.27648	0.201058	0.110668	0.199465	0.260954	0.172443	0.107963	0.149367	0.187484	0.135704	0.207091	0.296419	0.14869	0.181478	0.181722	0.211287	0.169825	0.179064	0.16538	0.132163	0.107582	0.124844	0.147254	0.22203
0.235145	0.680365	0.219341	0.157654	0.379219	0.247832	0.236776	0.223279	0.932314	0.260647	0.491328	0.695943	0.354849	0.596196	0.441638	0.299446	0.383171	0.718236	0.183695	0.33117	0.292338	0.748111	0.28767	1.2279	0.635324	0.366139	0.497018	0.260634	0.2275	0.201926	0.211923	0.867077	0.735673	0.972763	1.46686	0.35966	0.401348	0.808931	0.173819	0.251667	0.443715	0.485932	0.273553	0.91659	1.31373	0.460151	0.688089	0.363016	1.47091	1.08519
0.95648	1.40528	0.535762	0.963298	1.26013	0.814266	1.29865	0.652188	1.07533	0.922169	1.1946	1.3295	0.543655	0.801218	0.816527	1.65577	1.01798	1.27716	1.229	0.262971	0.981066	1.79876	1.15071	1.80884	0.654151	1.03885	0.994036	1.26202	1.40123	1.1759	0.849329	1.24648	0.708717	1.39251	1.06574	1.46533	1.28634	0.936593	1.07841	1.3619	2.78156	0.32987	1.3101	1.81459	0.990001	1.70442	2.22257	1.32783	1.71268	1.27317
3.44293	2.83358	2.06607	2.02692	2.67587	2.12071	3.91757	3.42513	5.68861	2.76075	2.01365	2.3024	1.97675	2.39458	1.99279	1.92545	1.73208	3.33957	1.33754	1.42231	3.87717	0.988435	2.91401	5.40921	2.17514	4.49398	4.21763	2.60512	1.55817	1.75735	0.938791	3.46332	3.00039	3.63584	2.8931	7.52785	2.50319	3.75192	4.41989	3.95867	4.57164	1.24344	2.15536	4.89476	5.25155	4.38635	1.37967	9.26355	5.93155	3.55455
2.17486	2.51579	1.9859	2.07271	1.76847	2.23949	1.61025	2.39785	1.98752	1.23286	2.1925	1.93218	1.82508	2.61773	2.06979	1.83533	2.16043	2.39475	1.84054	1.52992	3.09406	2.59034	1.94977	2.28739	2.49725	2.44672	2.43291	2.24281	1.44098	2.06147	1.63618	3.7522	3.00391	3.92126	2.77423	1.63279	0.935979	2.09543	1.6432	2.07172	2.80418	2.96895	1.23478	2.55122	2.80749	2.50056	2.21902	2.53049	3.12578	3.03518
0.627274	0.467355	0.60746	0.971157	1.00419	0.801732	0.668315	0.826651	0.597336	0.599413	1.07913	0.528206	0.747608	0.562556	0.647375	1.34816	0.917431	0.735024	1.49965	0.969368	0.598372	0.704622	0.869565	0.647123	0.717103	0.658892	0.843241	1.02867	1.34214	0.808342	0.649604	0.730567	0.638855	0.625626	0.762835	0.53376	0.351543	0.702149	0.629445	0.604595	0.592031	0.582547	0.964692	0.659457	0.622626	0.588893	0.604303	0.684885	0.674172	0.701262
0.177636	0.102389	0.285625	0.289343	0.08726	0.541243	0.259041	0.437331	0.206062	0.187126	0.190567	0.10112	0.115519	0.169805	0.293135	0.23238	0.154839	0.198657	0.177626	0.118125	0.182133	0.220352	0.635526	0.269092	0.327676	0.183191	0.194201	0.377715	0.149365	0.31836	0.660764	0.138891	0.20238	0.16128	0.188104	0.259558	0.541888	0.358038	0.0832778	0.279072	0.600529	0.476599	0.692281	0.164701	0.467596	0.329012	0.374756	0.369072	0.201886	0.229221
0.83612	0.361546	0.608902	0.958038	0.876962	0.693866	1.28829	0.503094	0.688089	1.44017	0.825968	0.600853	1.05237	0.812348	1.20563	1.09748	0.502185	0.728969	0.937295	0.957854	0.583976	0.624259	0.649562	0.658631	0.696233	1.05064	0.74499	0.832986	0.680365	0.975324	1.01728	0.799872	0.663262	0.714592	0.546747	0.397772	0.497389	0.642839	0.558378	0.390686	0.647626	0.619195	0.387027	0.766049	0.707965	0.657808	0.637064	0.709119	0.761673	0.747887
0.719683	0.453227	0.558378	0.402803	0.83375	0.632791	0.83619	0.530645	0.747161	0.529072	0.507898	0.934318	0.976086	0.649646	0.910996	0.92885	0.696864	0.502134	0.617627	0.307891	0.914244	0.714184	0.82203	1.33901	0.526843	0.782656	0.703532	0.971817	0.675493	0.475534	0.52086	0.631513	0.920133	0.926012	0.749008	0.965624	1.45134	0.802375	0.416858	1.25956	1.64604	0.620078	2.43279	0.700624	0.664011	0.687474	1.05623	1.13246	1.0271	0.941797
0.327439	0.859106	0.9739	0.759475	2.27599	0.950661	1.17154	0.708015	1.24389	0.417798	1.64298	1.30587	1.00532	0.655652	0.889442	1.12679	1.61773	0.609125	1.58426	0.710278	0.562746	1.09838	2.57792	1.80629	1.05086	1.6233	0.929627	1.50367	2.52143	1.11021	0.752559	0.85859	0.921829	1.09324	1.02655	5.41301	1.02143	2.51225	2.05385	2.01365	2.29674	0.790764	4.03812	1.61095	1.11967	5.23423	3.43088	2.86607	2.75748	0.947598
0.865801	1.89233	1.04783	0.559628	0.386563	0.870777	0.782656	0.619272	1.16958	0.529017	1.11911	0.779606	0.635001	1.39386	0.496697	0.453721	1.33756	0.433745	0.707564	0.815129	1.20636	1.9145	1.35534	1.44749	1.35141	1.15149	1.2147	1.04432	0.378315	0.456517	0.788146	1.18419	1.45155	1.007	1.87441	0.710328	1.50094	1.46988	1.57803	1.27506	1.23175	1.25331	0.45901	1.357	1.34063	0.728704	0.727273	0.783945	0.982125	1.45334
12.972	10.872	33.2812	8.7382	6.89275	8.72068	13.1851	19.6121	19.9948	5.39607	19.6175	11.3446	8.25696	18.596	5.00751	5.39607	20.2782	16.2896	5.36769	5.34731	14.9564	12.8489	23.6105	24.4224	13.3117	6.97496	10.9682	11.9993	3.25034	9.98602	9.90393	15.8416	18.1412	18.7783	22.5759	9.99201	10.6203	9.86777	10.1793	14.9296	17.2301	136.047	12.2651	18.6459	24.0246	39.3051	26.293	16.4948	25.2985	17.261
0.465614	0.363914	0.387297	0.302224	0.40256	0.516156	0.405071	0.712403	0.615233	0.350742	0.327686	0.466092	0.845023	0.418428	0.618123	0.42935	0.483068	0.723432	0.379824	0.483559	0.445157	0.957854	0.639959	0.665513	0.430682	0.409149	0.614855	0.496968	0.223644	1.08411	0.787588	0.684275	0.575904	0.453844	0.520454	0.455872	0.576901	0.435218	0.158138	0.43431	0.649477	0.492635	0.618429	0.413496	0.779423	0.383215	0.705866	0.780275	0.657462	0.550934
0.737409	0.0982222	0.108147	0.135595	0.616295	0.384763	0.0471787	0.0811425	0.253833	1.00341	0.903832	1.02352	0.315119	0.371955	1.15618	0.501002	1.00743	0.733514	0.941088	0.103825	0.761963	0.921744	0.890472	0.867905	0.0625586	0.221872	0.91659	0.681431	0.269469	0.637267	0.788457	1.44699	0.627825	0.876271	0.921999	0.326552	0.40803	0.700329	0.0780945	0.275832	0.718701	0.697496	0.0367269	1.0774	1.18287	0.832639	1.45932	0.889996	1.08246	1.32807
1.00374	0.299177	0.34303	0.685213	0.347524	1.62106	0.859402	1.53412	0.362818	0.68348	0.617703	0.62162	1.22242	0.808015	1.74926	0.554816	0.272139	0.374574	0.254952	0.8364	0.351161	0.477441	0.12474	0.525569	0.565739	0.199021	0.110825	0.227697	0.252067	1.51197	1.26849	0.491835	0.61717	0.125426	0.71286	0.318969	0.245543	0.190233	1.10702	0.236435	0.291937	0.595557	0.21347	0.572213	0.158614	0.165136	0.30976	0.150326	0.0800448	0.403959
2.26578	2.38817	2.40796	1.92767	2.00437	2.8618	1.63223	2.04044	3.14208	1.69039	1.88115	2.32699	2.22856	2.95168	2.18996	1.68594	2.04061	2.98463	1.31971	2.0222	1.57376	3.54283	2.19669	4.08263	2.55043	2.22119	1.92178	1.87382	1.52372	2.06954	1.83194	3.62542	2.59175	2.9449	4.84543	2.43534	1.5324	3.24812	2.06339	2.0434	2.05804	2.19964	1.53142	4.65528	3.60438	1.86348	3.18725	1.98859	5.20779	3.43773
1.22507	0.745101	0.636213	0.69735	0.609868	0.994728	0.75375	0.730887	0.467028	0.532765	1.084	1.02621	0.573921	0.803084	1.19647	0.67769	1.42414	1.29609	0.972573	0.784068	0.731368	1.13814	0.843882	0.666489	0.621272	0.715564	1.13104	0.715461	1.60164	1.06563	1.0814	0.863409	0.649899	0.705219	0.645995	0.604814	0.459052	0.660327	0.715973	0.646663	0.763417	0.40295	0.804182	0.642591	0.702099	0.704771	0.748111	0.68526	0.583839	0.776578
0.166814	0.335604	0.497958	0.284051	0.46516	0.683948	0.238186	0.263908	0.335255	1.42282	0.296138	0.518538	0.708918	0.845166	0.153438	0.519157	0.315477	0.40935	0.186216	0.291537	0.0884643	0.93985	0.230744	1.40982	0.658675	1.61794	0.334124	2.66631	0.421603	0.381199	0.36406	0.298116	0.215434	0.243049	0.350361	1.70451	2.36362	0.536193	0.355707	0.498281	1.58534	0.73616	4.28082	1.1566	1.22521	0.887626	4.94218	0.907359	0.376095	0.337075
0.41841	0.601395	1.06332	0.823995	0.756716	0.474113	0.550115	1.21861	0.390335	0.58872	0.652401	0.417676	0.484684	0.701902	0.913492	0.988631	0.875197	0.506098	0.647501	0.545643	0.356011	0.834376	0.304664	0.375897	0.793777	0.278575	0.20571	0.32001	0.805218	0.448109	0.393887	0.553679	0.474136	0.441326	0.449681	0.491739	1.70308	0.373023	0.190053	0.310154	0.905633	0.519022	0.955932	0.492005	0.356735	0.161723	0.578135	0.255944	0.233187	0.344851
0.716949	0.918442	0.790701	0.809258	0.378745	0.666311	0.599664	0.774413	0.586338	0.562303	0.823859	0.64612	0.462193	0.543419	0.729129	1.25478	0.938615	0.636132	0.87382	0.809454	0.466287	0.487876	0.966838	0.658588	0.522439	0.589588	0.519481	0.525348	0.458947	0.814598	0.406587	0.60746	0.78883	0.228014	0.609496	0.45469	0.893575	1.24771	0.603901	0.40122	0.422565	0.350165	0.682454	0.501832	0.581598	0.555895	0.490485	0.606134	0.600024	0.620193
0.633473	0.671772	0.49186	0.220921	0.0923276	0.319918	0.208251	0.564175	0.434707	0.206181	0.514907	0.311837	0.425152	0.383318	0.231075	0.381127	0.403877	0.0862813	0.148311	0.140066	0.651551	0.245537	0.8967	0.477806	0.676911	0.20889	0.657765	0.311779	0.121902	0.180313	0.339905	0.562493	0.522958	0.479662	0.846668	0.312666	0.656771	0.622471	0.639509	0.465268	0.571331	1.63819	0.392095	0.507048	0.514218	0.329696	0.244242	0.448511	0.464706	0.540307
6.42343	4.15162	3.78645	5.92838	5.81058	5.56173	3.12441	14.0691	5.98122	2.12477	4.054	3.15209	1.87	6.15082	4.68296	3.01614	5.34245	3.84468	3.72981	1.91457	13.8015	5.89449	4.332	4.5436	29.6156	6.06134	6.34598	6.71321	1.42231	2.55232	3.43997	14.9999	6.29525	23.2083	4.81232	6.79163	3.80127	9.7972	2.24296	5.42123	6.5591	7.54375	1.71913	10.0405	8.31463	4.80354	6.76544	7.16281	13.6454	13.3405
0.03747	0.0219708	0.0912492	0.0138616	0.0230102	0.0533248	0.0249875	0.0394991	0.0303131	0.0146546	0.032374	0.0218948	0.0412643	0.0223604	0.0109161	0.00901307	0.0233803	0.0215964	0.00627274	0.0196854	0.0487401	0.0279736	0.0109891	0.0336893	0.0459897	0.0260464	0.0156128	0.0265182	0.00870322	0.0338078	0.203724	0.114534	0.0385252	0.0267924	0.973426	0.0138976	0.123018	0.012313	0.0444267	0.0598337	0.013157	0.176066	0.03444	0.0119733	0.0295596	0.0220298	0.0243487	0.0224024	0.083619	0.0265111
1.29406	1.16063	1.30625	1.00644	1.04309	1.32735	1.32263	1.43219	1.93829	1.51955	1.01421	1.61483	1.53624	1.80135	1.41898	1.29914	1.10646	1.38184	0.823588	0.977995	0.965531	2.41692	1.70599	2.43356	1.16212	3.01259	2.08768	1.12757	1.17847	1.11983	1.43084	2.34368	1.5361	1.46415	2.58645	1.64793	0.538532	1.32688	1.39663	1.01013	1.70198	1.66362	1.32859	2.7684	2.72948	1.57876	3.64432	1.38169	2.97752	2.15109
1.45155	1.1661	1.49475	0.973141	2.10349	1.96067	1.63191	1.59013	1.73112	1.07521	1.4691	1.34419	1.50019	1.39305	1.31674	1.59411	1.28986	1.35099	1.54691	1.3362	1.46782	1.39964	1.53186	1.55405	1.19161	1.06055	1.70858	1.42615	1.17606	1.96044	1.56875	1.82033	1.27522	1.78012	1.72331	1.47029	1.03975	1.40113	1.26283	1.92608	1.36422	1.37026	1.60295	1.85189	1.62388	1.33649	1.17831	1.63201	2.77039	1.85584
2.29827	1.83153	1.57876	1.67179	1.70103	1.74926	1.85801	2.10673	2.15745	0.901795	1.65618	1.16414	1.10099	1.70541	1.51925	2.07706	1.87755	1.74892	1.27363	1.43536	2.89947	1.51442	2.8926	1.2784	2.28875	1.39649	1.62874	1.95519	1.50741	1.11026	1.07374	3.58461	1.95236	3.3206	2.42559	2.12843	1.61721	2.82119	1.21818	1.6866	1.89215	2.25413	1.42132	2.34417	2.23874	2.49333	2.05643	1.48535	2.91282	3.67229
0.423424	0.535017	0.683013	0.528234	0.534645	0.551359	0.589727	0.666978	1.24088	0.475873	0.472367	0.901551	0.64771	1.00668	1.02751	0.926183	0.597229	1.01049	0.442635	1.44144	0.562936	0.403405	0.780945	0.878657	0.611322	0.775615	0.459855	0.496944	0.904241	0.488114	0.671411	0.629564	0.68157	0.605657	0.585069	0.354648	0.27312	0.460617	0.450653	0.365497	0.571331	0.616713	0.468121	0.768699	0.583976	0.587475	0.599952	0.420521	0.676178	0.65066
0.91508	1.42635	0.95584	1.16573	1.29346	0.515119	0.556669	0.482579	1.26517	1.48386	1.47256	1.49073	1.4551	0.733084	1.15752	1.41117	1.62938	1.53759	2.07284	1.13227	1.67912	1.18898	1.1575	0.793462	0.730247	0.811688	1.01542	1.21576	1.84356	1.60493	2.12761	1.38244	1.21284	0.873363	1.04559	0.302581	0.337541	0.714439	0.68686	0.772917	0.869565	0.682221	0.910664	0.956572	0.926612	0.841609	1.02948	0.905223	1.22562	1.29848
0.919287	1.14354	1.54109	0.778392	0.61931	0.537346	0.633633	0.672179	0.854482	0.424556	0.617856	1.27311	0.775916	0.817595	1.45271	0.820883	0.66827	0.814797	0.629287	1.2728	2.55336	0.851644	0.707414	1.06099	0.746491	0.818867	1.36257	0.693626	0.886997	0.871764	0.933707	1.10639	0.773994	0.549209	1.04748	0.631752	0.615915	0.688895	1.0226	0.601612	0.84674	0.564461	0.697642	0.789328	0.64	0.909587	0.445117	0.564175	0.520156	0.707514
1.09369	0.826105	0.822978	1.25258	0.830358	1.25712	0.873134	0.985707	0.87558	0.751823	0.978091	1.31794	0.849834	0.931967	1.07909	0.808538	0.848392	0.976562	0.98068	1.3018	1.36733	0.947508	0.728332	0.789702	0.785608	1.11606	0.675493	0.779302	1.01572	1.3986	1.5478	1.17838	0.994036	0.928333	0.756201	0.627274	0.441521	0.678012	0.721449	0.634638	0.900982	0.598874	0.864454	1.2369	0.718081	0.905879	0.833611	0.593437	0.709119	0.919963
0.768226	0.513505	0.512821	0.651763	0.703087	0.679856	0.862218	0.620001	0.605254	0.702889	0.715922	0.528681	0.73373	0.620232	0.722022	0.697253	0.496771	0.603027	0.572935	0.625547	0.687711	0.507975	0.496106	0.572312	0.672902	0.750019	0.728544	0.660415	1.11068	0.578235	0.464749	0.761963	0.461958	0.803535	0.634156	0.581632	0.305213	0.685871	0.562968	0.490436	0.569022	0.618391	0.555401	0.698714	0.564748	0.58827	0.726269	0.506919	0.597693	0.541331
1.07694	1.05625	1.32498	1.23619	1.2372	0.888021	0.960246	0.746324	1.32529	1.47204	1.11324	1.27566	0.896057	1.17718	0.893575	0.753636	1.31289	0.705517	0.541859	1.21939	1.33717	1.56311	0.701557	2.78296	1.364	1.35868	1.85525	1.17539	0.75523	0.709774	1.17387	1.39976	1.05098	1.07365	1.36407	1.62904	1.04177	1.85216	1.252	1.02774	1.48936	0.928936	1.37101	2.22128	1.6889	1.35971	4.07465	0.987362	1.3881	1.49593
0.350447	0.360438	0.438654	0.409433	0.321357	0.463994	0.327955	0.531745	0.363069	0.335999	0.387627	0.396558	0.34559	0.30828	0.545941	0.788706	0.541594	0.401978	0.570418	0.523533	0.415248	0.370824	0.507666	0.694927	0.455934	0.330491	0.506611	0.249495	0.289394	0.546329	0.288151	0.408864	0.412763	0.251934	0.373329	0.293677	0.528039	0.45901	0.294386	0.283431	0.45958	0.316857	0.219476	0.366946	0.34118	0.278497	0.460532	0.38004	0.383156	0.444405
1.06349	1.05354	1.20084	1.28861	0.887075	2.47213	1.47145	1.51639	1.63897	0.34565	0.87804	0.715052	0.730994	1.53898	0.903587	1.30506	1.39268	2.35732	0.687427	0.603865	0.635001	1.80802	2.27221	1.71641	3.68365	1.44559	1.10961	1.29906	0.736214	0.916674	0.0337064	1.25094	1.32795	1.55693	2.82709	1.30151	1.13309	2.13739	0.897747	0.898069	1.03273	2.29032	1.43565	2.22777	3.19173	1.90582	1.69317	1.69874	3.4139	1.96529
1.05437	1.03111	1.37108	1.13707	1.01247	1.57612	1.37221	1.19396	1.47599	1.2288	1.20772	1.37884	1.0057	1.30941	1.44473	1.08415	0.865277	1.58768	0.871688	0.97371	1.48936	1.90056	1.91384	1.85004	1.45596	1.75448	1.58153	1.19416	1.41914	0.901226	1.3565	1.47776	1.31492	1.34241	1.47063	1.7019	0.88881	1.56318	1.55899	1.12723	1.58183	0.936067	2.05825	1.81189	2.79135	2.67852	2.99195	1.73711	2.07495	1.79282
1.55802	0.434179	0.684416	0.867378	1.42227	1.20565	0.613121	0.79713	0.77997	1.97204	1.07369	0.722126	0.846955	1.12034	0.303095	1.23069	1.7614	1.08413	1.21652	1.21356	1.33497	0.527955	1.28946	1.892	1.19225	0.848105	0.96609	0.970874	0.0752729	1.47375	1.56946	0.738771	0.543478	0.731689	0.811952	0.513215	1.36943	0.653381	0.751258	0.48676	0.68686	0.731475	0.668449	0.684369	1.28174	0.727061	0.733676	0.849185	0.580316	0.61222
4.24124	3.61952	1.61865	5.04414	2.46761	1.90847	2.38943	5.49904	3.0077	0.877578	3.69222	2.4233	5.7323	2.53962	3.9546	4.70699	1.93352	2.87051	1.3462	1.95645	4.52018	4.05137	1.11929	2.00369	2.31075	6.88326	3.60581	2.37057	2.4079	2.2238	1.74911	3.3129	2.17789	6.71006	1.61059	1.62986	0.904404	2.49638	1.07652	1.08764	2.69005	1.20087	2.0917	2.98231	2.03546	1.91729	4.69351	1.00352	3.07503	4.54835
1.25747	2.16025	1.7481	2.11775	0.369263	1.02043	1.10121	2.62013	1.37711	3.778	1.89566	2.05036	2.1835	2.35333	1.34949	2.27108	0.735835	0.668003	0.859033	1.04531	1.78364	3.67053	1.61907	1.21552	1.59246	1.92957	2.50025	0.5576	1.046	1.08586	1.63679	1.13273	2.44332	0.867604	2.39234	0.32496	0.405531	2.16525	1.06328	0.889442	0.939673	1.80532	0.832917	0.96637	1.25078	0.613798	0.68306	0.336055	1.08293	1.82939
0.524659	0.409971	0.482789	0.587855	0.657808	0.758495	0.301042	1.15595	0.591506	0.598015	0.684088	0.683247	0.731582	0.524164	0.624064	0.720409	0.772082	0.6391	0.711339	0.474091	0.629366	0.453248	0.948587	0.719994	0.621968	0.287084	0.744657	0.683574	0.813736	0.642137	0.868357	0.679902	0.499027	0.402479	0.530363	0.35073	0.335683	0.576801	0.222119	0.562366	0.550146	0.482276	0.464145	0.49776	0.630398	0.60423	0.571984	0.655265	0.541829	0.768049
1.17215	0.669658	0.865876	1.20182	1.38504	1.01421	0.981258	0.929454	1.29363	1.71585	1.0758	1.01594	1.15516	0.698519	1.66351	1.19339	1.54744	1.42588	1.64544	1.04675	1.15215	0.717875	0.904486	1.223	1.31759	0.993838	1.20288	1.16414	2.03969	1.11237	1.41415	1.15334	0.888257	1.19409	0.89071	0.818197	0.458232	0.970874	1.06858	NaN	0.820681	0.588305	1.18082	1.05013	1.20831	1.11591	1.21256	1.08617	1.02718	0.93668
0.256944	0.348602	0.241214	0.734754	0.416372	NaN	0.23872	0.325956	0.409769	NaN	0.250658	0.209591	0.242172	0.217908	0.232916	0.309196	0.404367	0.246518	0.368283	0.138024	0.903261	0.217311	0.340344	0.32173	0.19223	0.503069	0.210049	0.313686	0.620078	0.276587	0.284519	0.339224	0.182335	0.168722	0.285331	0.22969	0.175704	0.220318	0.20596	0.197332	0.287828	0.214823	0.337815	0.221469	0.278365	0.163886	0.260389	0.231294	1.93975	0.290808
0.311935	0.501781	0.292295	0.19511	0.183453	0.261993	0.392034	0.255376	0.284357	NaN	0.395351	0.325754	0.403421	0.377173	0.599664	0.224749	0.266852	0.555556	0.263873	NaN	0.259228	0.252864	0.69808	0.407199	0.306589	0.44016	0.409685	0.551207	0.209916	0.469197	0.213356	0.346344	0.451814	0.32774	0.532226	0.405482	0.234681	0.42889	0.347066	0.478492	0.335278	0.751033	0.395241	0.480238	0.545852	0.732333	0.56057	0.246445	0.545911	0.31251
0.991572	2.86156	NaN	1.00406	1.53541	0.658068	1.28961	1.44252	0.967867	1.31865	1.13166	0.793525	0.889601	1.09973	1.08453	0.616029	0.865651	0.74355	0.857486	1.18345	1.39291	0.984834	1.04889	1.22336	0.460215	0.925241	0.6391	0.51488	0.837872	0.779606	0.904895	0.631592	1.08172	0.788146	0.663834	0.805218	0.660851	NaN	1.3745	0.918105	0.698812	0.437331	1.3186	1.00699	1.04769	0.851209	1.13769	0.967118	0.832847	0.586786
0.520508	0.545137	0.525984	0.347717	0.556483	0.176969	0.399457	NaN	0.235178	0.111749	0.684556	0.430367	0.287546	0.287571	0.385089	0.448491	0.677186	1.15221	0.346105	0.236569	0.847529	0.872448	1.27659	0.395023	0.289847	0.548968	0.577001	0.50035	0.277886	0.216915	0.390579	1.17269	0.818063	0.686577	1.22446	0.555772	0.34577	6.8861	0.282598	0.320636	0.604888	0.305483	0.466788	0.590668	0.526067	0.564557	0.471898	0.681153	1.25552	1.12174
1.80956	1.53633	0.487781	0.751371	1.13814	0.889759	1.59264	0.79233	1.23417	NaN	1.18964	0.733676	0.439928	1.33583	1.28384	0.929627	1.53048	1.92042	1.12017	0.688184	1.55885	1.22876	2.23509	1.63902	0.847099	1.51469	3.42079	1.79244	1.01222	0.822571	0.963206	1.8957	1.55574	2.57985	0.770179	0.747496	0.891424	1.61361	1.04721	1.46376	2.22638	0.796813	2.20371	1.70908	2.57818	2.36731	1.76685	1.75688	2.72124	3.48845
0.49527	NaN	NaN	NaN	0.389378	NaN	NaN	NaN	0.303933	0.413736	0.234214	0.402933	NaN	NaN	0.504668	NaN	0.382497	0.485107	0.48676	NaN	0.707114	0.367782	1.17708	NaN	NaN	NaN	0.35402	0.422833	0.620771	NaN	0.760688	0.54606	0.524356	0.567279	0.388003	0.331895	NaN	0.474901	0.273613	NaN	0.633914	0.653894	0.956389	0.483208	0.557693	0.851644	0.612595	NaN	0.848969	0.771426
NaN	NaN	NaN	NaN	NaN	NaN	0.472478	NaN	NaN	NaN	0.67627	0.729501	0.647082	0.469307	1.14778	0.605327	0.651296	NaN	0.759244	1.33112	0.976849	0.708968	NaN	NaN	1.91784	NaN	NaN	1.08951	0.891266	NaN	0.583124	0.548125	0.449438	NaN	0.461723	NaN	NaN	NaN	NaN	NaN	0.581767	NaN	0.741565	0.64914	0.474023	1.13026	0.436662	NaN	0.654622	NaN
0.477441	0.542918	NaN	0.468362	NaN	1.16757	0.795988	0.483115	0.477783	NaN	0.500225	NaN	0.860437	NaN	1.09041	NaN	NaN	NaN	NaN	0.877116	0.812216	0.950119	NaN	0.552486	1.01924	0.675356	NaN	NaN	0.556669	NaN	NaN	NaN	0.437426	0.470965	0.670331	0.518457	0.44611	NaN	0.673673	0.43929	NaN	NaN	NaN	NaN	NaN	NaN	0.629168	0.647207	0.606097	NaN
1.23911	1.3604	0.788022	0.92081	0.87535	1.37278	0.911577	2.05655	0.774353	0.748783	1.30675	0.875197	1.09572	0.825287	1.14392	0.793903	0.919709	1.53624	0.878503	1.022	1.17279	1.0736	1.21451	0.998004	1.07214	1.16821	1.03358	1.07289	1.23124	1.0994	1.28864	1.05423	0.919963	0.935716	1.11439	0.668941	0.68264	0.91659	0.682361	0.748559	0.968711	1.04267	1.1315	1.06018	0.910913	0.76746	1.28259	0.709975	0.980873	0.80289
1.0026	0.958038	0.832224	1.38804	0.749738	1.04407	0.664452	0.831532	0.865052	0.912242	1.04457	1.40189	0.899847	0.978665	1.36549	1.11175	0.987167	1.10651	1.10462	1.06198	0.708416	1.16861	0.716692	0.650026	0.536596	0.974469	0.634638	0.659761	1.48856	1.70277	1.48974	1.46445	1.02514	0.778452	0.838926	0.542918	0.518054	0.72223	0.788892	0.392727	0.7397	0.588651	0.958222	1.09658	0.686106	0.629168	0.861549	0.416979	0.722909	0.88129
0.531406	0.481139	0.584419	0.516609	0.585583	0.458379	0.776699	0.508233	0.757289	0.473328	0.567698	0.405778	0.687285	0.565067	0.921404	0.993542	0.624649	0.918274	0.566219	0.622433	0.413496	0.591926	0.537201	0.674445	0.625313	0.704622	0.600709	0.701066	0.641849	0.454711	0.552731	0.525376	0.566829	0.513954	0.494462	0.591576	0.420575	0.588581	0.392696	0.479892	0.458842	0.546627	0.704126	0.793651	0.501178	0.53056	0.619963	0.303961	0.561073	0.713572
0.672314	1.00208	0.654365	1.06529	0.514721	1.35391	1.35986	1.78833	1.11748	0.84488	0.972857	0.866476	1.28844	0.661945	2.03645	1.26228	0.449398	0.877039	0.658892	0.548817	0.71803	1.49957	4.88544	1.44304	2.11117	2.11542	1.18131	1.28886	0.496993	1.9384	2.83294	0.896379	1.08944	0.847386	0.943485	1.23435	1.26839	1.52446	1.16017	1.32459	1.13617	1.48425	1.10568	2.01313	2.29938	1.85943	2.00128	2.488	2.16109	0.812216
0.300634	0.244816	0.443321	0.337007	0.236155	0.321688	0.432376	0.220104	0.40843	0.26976	0.354572	0.601612	0.406339	0.393376	0.146479	0.403291	0.249091	0.516342	0.309081	0.436243	0.267931	0.207387	0.133551	0.376109	0.351235	0.602228	0.148197	0.266923	0.757231	0.566508	0.268658	0.398835	0.176551	0.214146	0.169176	0.521268	0.241949	0.338215	0.280607	0.144915	0.215959	0.249619	0.374785	0.332668	0.117141	1.79827	0.217723	0.321792	0.0865052	0.126991
0.530814	0.854701	0.330066	1.03472	0.161849	0.831117	0.365885	0.341857	0.52304	0.35327	0.283736	0.186289	0.375305	0.550509	0.708115	0.623714	0.48771	0.670556	0.575838	0.561073	0.205563	0.674673	0.493243	0.583363	0.743108	1.45802	0.598623	0.622433	0.490629	0.270468	0.593472	0.377003	0.382307	0.258612	0.998004	0.655093	0.560475	0.831601	0.685213	0.695894	0.71664	0.496081	2.58866	1.69713	0.900252	0.802439	0.948857	0.680226	0.667111	0.959049
1.0552	0.788768	0.814929	0.954563	1.84744	0.594707	0.644413	0.543419	1.0683	1.30451	1.21767	1.0314	0.959785	0.916338	0.997904	1.23399	1.34532	1.18029	1.60979	0.9176	1.10126	0.834585	0.880359	0.687616	0.63008	0.850702	0.847745	1.05466	1.43947	1.03699	1.014	0.964413	0.793714	0.981643	1.00356	0.760341	0.666223	0.832986	0.580248	0.740193	0.830013	0.715768	0.565067	0.752729	0.962186	0.744602	0.93835	0.976944	0.975419	0.883392
0.900009	0.928505	0.524742	0.610314	0.812942	0.52776	0.675083	0.621968	0.699839	0.672766	0.906618	1.1534	0.807494	0.656987	1.03565	1.24224	0.665203	0.870701	0.798403	0.952925	1.4964	1.09341	0.784191	0.983478	0.745434	1.02945	1.1268	1.26789	0.772559	0.79783	0.822842	0.840619	0.742335	0.707564	0.874355	1.01294	0.557258	1.23399	1.08415	1.37984	1.9181	0.849545	1.91622	0.897827	1.18289	1.52091	1.15558	0.701902	1.21951	1.29452
0.476803	0.571168	0.19393	0.397488	0.799808	0.747217	0.423783	0.588893	0.684135	0.825355	0.647752	0.672359	0.599089	0.549722	0.601287	0.525901	0.598552	0.476077	0.613648	0.721449	0.674582	0.616599	0.596054	0.883861	0.473642	0.619694	0.504974	0.575374	0.645911	0.598408	0.512348	0.451182	0.523122	0.648382	0.409853	0.494976	0.45106	0.493437	0.643046	0.480515	0.432432	0.374939	0.510621	0.671501	0.682967	0.462942	0.854044	0.564079	0.658328	0.51725
1.34252	0.807233	0.823249	1.46413	1.81482	0.811425	0.926441	1.17189	1.08014	1.66121	1.33012	1.33597	1.06569	0.95429	0.927902	1.301	1.36201	0.961723	1.54832	1.0878	1.24253	0.917179	0.841184	0.907276	0.942152	0.896459	1.32508	0.887075	1.48599	0.99226	1.3961	1.09518	1.0197	1.20614	0.947598	0.871308	0.67563	0.752389	0.925583	0.855139	0.790077	0.849545	1.00053	1.01079	0.9522	0.845952	1.06997	1.17802	0.900495	1.15298
1.27382	0.782044	0.622433	0.745879	0.839067	0.852006	0.601504	1.13785	0.513321	0.498679	0.874661	0.804505	0.31001	1.48759	0.843597	0.785793	0.972573	0.439232	1.12296	1.00966	1.49629	1.05795	1.11776	1.18439	0.813802	1.40857	0.789204	1.46666	1.54012	NaN	0.853825	1.16264	1.04681	1.25053	0.685683	1.66845	0.575308	0.887548	0.78827	1.21572	1.23413	0.309014	1.91725	1.8639	1.71913	1.26722	2.49432	1.16668	1.2313	3.58076
1.85939	1.04971	0.590249	0.860956	2.27972	0.657765	0.856604	1.18322	1.19459	2.83254	3.34124	1.67057	2.78195	1.30012	1.60816	2.59518	2.2969	1.76857	2.44355	1.37836	1.87326	0.886289	2.08729	1.33515	0.814133	1.29328	1.70882	1.73373	7.42666	1.26097	1.89566	1.17559	1.81874	1.61658	1.19283	1.03302	0.66569	0.750356	1.26598	0.633072	1.07256	NaN	0.896539	1.14088	1.41365	1.78345	1.4347	1.41808	1.20032	0.991572
1.40333	2.17491	1.17502	0.935979	1.38383	1.33358	0.900901	1.13763	2.67659	NaN	0.838715	1.51506	1.36926	1.68785	2.08952	1.16617	0.897827	1.09412	0.540482	1.36661	0.906865	2.02224	0.832778	2.26173	0.787464	1.49714	1.54	1.09839	1.28469	0.998702	1.8096	2.22207	1.46643	1.56009	2.13111	1.6509	0.448531	1.68745	1.66196	NaN	0.902446	NaN	0.70279	2.24739	1.68848	0.903914	2.83214	1.14508	2.45694	2.52653
0.503094	0.527732	0.433163	0.522739	1.00643	0.536711	NaN	0.2941	0.59312	NaN	0.860585	0.670107	0.387943	0.559566	0.977517	0.78883	0.722022	NaN	0.748111	0.473934	0.621968	0.775014	0.663086	0.549209	0.402172	0.448672	NaN	0.477236	0.411946	0.628417	NaN	NaN	0.458863	0.636618	NaN	NaN	NaN	0.534359	NaN	NaN	0.911993	NaN	0.588755	1.0308	0.695797	0.776578	0.452039	0.88968	1.00889	0.989707
NaN	NaN	81.88	81.7127	NaN	30.8766	88.0437	76.8462	NaN	26.02	16.5769	NaN	9.9691	16.0336	19.0429	32.5447	NaN	NaN	NaN	NaN	NaN	8.7146	7.31957	8.77039	186.72	8.98796	31.3982	NaN	NaN	NaN	NaN	8.33681	11.5158	20.6488	12.266	12.1544	NaN	28.4471	11.0755	NaN	NaN	54.0687	22.8634	8.28706	NaN	9.77517	12.0356	7.19683	NaN	8.80592
NaN	0.937822	11.2705	8.65726	NaN	1.28551	1.05955	1.5687	NaN	0.853971	7.37844	2.97725	NaN	5.93014	9.02039	NaN	NaN	1.18496	13.4834	3.83201	NaN	12.1493	NaN	NaN	NaN	NaN	NaN	0.706464	0.941354	8.40266	1.46759	1.18751	0.796178	5.68117	6.01359	0.671682	NaN	0.713318	NaN	0.759071	1.01273	NaN	NaN	NaN	NaN	NaN	NaN	1.6475	NaN	0.773395
3.01396	2.65788	14.2335	NaN	1.29801	0.607644	6.60328	0.558254	NaN	1.63918	3.0096	3.93298	NaN	1.02134	NaN	1.44571	NaN	NaN	12.6931	NaN	NaN	3.7435	133.284	7.60745	1.96271	10.9073	NaN	73.8062	0.517223	1.60005	0.584214	0.658501	11.408	NaN	0.849545	124.908	48.5343	56.5675	53.0026	121.35	27.5664	3.4382	19.8141	9.98901	46.3499	154.131	50.5382	82.1288	64.7752	13.1517
2.01633	NaN	1.40416	NaN	0.847529	NaN	NaN	NaN	2.56075	NaN	2.37767	1.86012	NaN	6.89846	0.895897	NaN	NaN	NaN	NaN	2.49091	2.83302	1.55289	1.56863	NaN	NaN	NaN	2.19332	NaN	NaN	1.19644	1.25326	1.28823	0.96965	NaN	1.31527	NaN	NaN	NaN	NaN	NaN	NaN	NaN	NaN	NaN	1.583	NaN	NaN	NaN	NaN	1.58657
0.973805	0.544514	0.382922	0.298187	1.76317	0.635647	0.609384	0.422619	0.688279	NaN	1.07156	0.803407	0.725268	0.856751	0.303499	0.433125	0.936242	0.83382	0.770297	0.756888	1.4643	0.612858	1.0959	0.790264	0.48771	1.20434	0.73692	1.28202	1.18284	0.753239	1.17251	1.10154	1.07099	1.30859	0.594636	0.371692	0.813074	1.07932	0.980873	1.02472	0.862069	NaN	0.7397	1.05651	0.939496	0.977326	0.881834	0.898311	1.02632	0.98174
1.17368	1.02415	0.924214	0.878349	1.28889	0.789515	0.859476	1.29948	0.950119	NaN	1.28366	0.860363	1.16519	0.83619	1.65505	1.13266	1.0959	1.04124	1.28322	0.385089	1.19424	1.821	1.71641	1.65544	0.542623	1.01958	1.07218	1.76336	1.19141	1.41603	1.36855	0.915499	0.893256	0.986583	1.29631	1.10844	1.51595	0.99453	NaN	1.39214	2.15917	0.834724	1.12801	1.10628	1.40548	1.68243	1.84261	1.85639	1.4308	1.78285
0.786287	NaN	NaN	NaN	1.91707	NaN	0.876271	2.69593	NaN	NaN	2.60247	1.2674	NaN	NaN	2.03911	2.09767	2.87472	NaN	2.11318	1.2773	NaN	NaN	1.76392	NaN	NaN	NaN	1.46988	3.32314	2.27035	1.20573	2.04303	0.695604	1.63696	NaN	1.19956	NaN	NaN	NaN	NaN	NaN	NaN	NaN	1.39526	1.69877	1.08999	0.993049	NaN	1.38677	NaN	NaN
1.0168	2.12382	1.45387	1.24386	1.36455	2.49551	0.711035	0.825491	2.85413	NaN	1.29485	1.13031	0.748503	1.96986	1.86972	0.995619	1.07373	2.14528	NaN	0.891742	0.945716	1.80986	3.5979	3.01787	1.43748	1.37508	1.33064	1.70946	0.784191	1.44812	0.497512	1.54672	1.80038	1.68362	1.91608	2.50094	1.5472	1.91487	1.09765	1.7111	2.01984	NaN	0.831255	2.62144	3.06701	2.57613	1.62117	1.93121	8.74891	1.96048
1.25149	0.99681	1.6758	0.968148	0.952381	3.07626	1.34299	1.20171	1.11043	NaN	0.947508	1.00242	1.08199	1.20983	1.55858	1.4694	1.15312	NaN	NaN	1.02098	1.25968	1.24174	2.56476	2.21779	0.646204	1.5625	1.08005	1.95255	0.376124	2.72509	1.35988	0.782534	1.31147	1.59706	NaN	0.843526	2.4209	0.754774	0.70917	1.30342	1.97601	NaN	3.98057	1.61621	2.28582	1.80825	2.25576	2.22089	NaN	1.46449
1.50155	2.14238	2.48466	1.59829	1.62203	1.3328	1.12557	1.74429	1.92204	3.50643	4.4154	9.54745	4.59327	1.32929	7.4184	9.32227	0.688184	7.22961	1.91578	3.26371	1.12197	9.27644	0.542123	1.6469	NaN	1.46877	2.42665	NaN	0.632951	2.02257	3.87882	2.24105	2.41022	1.17217	2.43256	0.859254	0.698275	1.32913	0.798658	1.67395	1.43829	NaN	1.41014	NaN	NaN	1.20796	NaN	1.25543	0.701115	1.1458
2.74303	1.80005	0.797385	1.8976	2.10939	0.939761	2.38681	0.96637	1.52509	0.94304	1.37963	1.37954	1.12021	2.43149	1.50884	1.70529	1.55531	2.44493	1.28023	1.68868	1.75466	1.63862	2.95081	2.32223	1.80232	1.82682	1.15663	2.19327	1.26319	1.816	1.4229	1.92156	1.76342	2.39017	2.29869	2.84795	0.929541	1.5794	1.73608	1.70823	1.48821	1.16081	2.3034	2.6509	2.48509	2.42536	2.61397	2.24019	2.41057	3.8625
0.6182	0.660371	0.436034	0.457038	0.448571	0.456558	0.611658	0.628614	0.646956	0.481649	0.630239	0.395632	0.550418	0.584385	0.645745	0.600817	0.613046	0.643832	0.545762	0.855725	0.496376	0.711187	0.84969	0.747999	0.744214	0.441053	0.894775	0.701754	0.671862	0.391481	0.609793	0.782779	0.738552	0.783147	0.56205	0.439812	0.709975	0.74151	0.575639	0.452304	0.744546	0.658154	0.838645	0.631393	0.813273	0.769408	0.924813	0.63484	0.773814	0.874967
1.34367	1.04236	1.32668	1.16308	1.91975	1.1001	1.7334	0.885896	1.52286	2.20211	1.99128	1.52891	1.45586	1.10251	1.25164	1.47639	1.82802	1.33702	2.08451	1.47256	1.41719	1.03361	1.14418	1.08115	0.903506	1.137	1.1912	1.44688	1.79992	1.55161	1.55137	1.2793	1.15832	1.00542	1.05785	0.887469	0.813935	1.02417	1.17931	1.11911	1.11453	0.959233	1.61311	1.34492	1.31309	1.27301	1.28266	1.41205	1.16359	1.14095
0.554816	0.671006	0.292552	0.29649	0.283174	0.348481	0.510777	0.58651	0.551755	0.339812	0.546418	0.324886	0.394337	0.506252	0.576668	0.539113	0.480054	0.528318	0.50615	0.531802	0.383715	0.56123	0.80064	0.609533	0.387612	0.467399	0.778452	0.640451	0.573723	0.372426	0.460723	0.733783	0.573395	0.587061	0.483816	0.275512	0.363504	0.646329	0.345746	0.479432	0.602264	0.716949	0.590005	0.591751	0.695943	0.739481	0.784929	0.511509	0.735348	0.756773
2.60539	2.22296	1.7391	1.89653	1.49696	1.37897	2.05449	1.41223	1.97851	1.93405	2.54052	3.05045	1.7212	2.94968	1.33261	1.60932	1.63776	1.78856	1.46724	2.04796	3.34975	2.86435	2.24739	3.59531	1.4612	2.79478	2.57248	2.49532	1.32739	1.31389	1.54571	2.97309	2.69049	3.28063	2.50796	2.30282	2.20187	2.46688	2.58592	1.58358	2.59578	1.699	2.03641	2.92329	3.1252	2.02647	2.49619	1.99748	2.37614	3.7522
0.552151	0.565259	0.347826	0.434443	0.329327	0.276572	0.452981	0.435426	1.48438	0.326968	0.732923	0.581328	0.509113	0.703185	0.704523	0.652955	0.508311	0.331159	0.591751	0.662208	0.671186	0.827746	1.04952	0.998602	0.370343	0.643542	1.00334	0.644455	0.458337	0.396118	0.623169	0.543567	0.727167	0.499401	0.830841	0.500927	0.623053	0.648088	1.18699	0.445613	0.912575	1.20434	0.631911	0.863707	0.946611	0.862887	1.08327	0.519022	0.68106	0.462299
1.46434	1.2536	1.28712	1.57565	2.21611	1.16372	1.61757	1.35033	1.54352	2.62778	1.59251	1.61447	1.47831	1.3901	1.38389	1.84911	1.96433	1.74792	2.58645	1.30414	1.22145	1.18524	1.36915	1.1957	1.38301	1.48987	1.24336	1.59421	2.37541	1.29361	1.74859	1.36874	1.57337	1.76675	1.09618	0.841043	0.793714	1.34311	1.15166	1.28753	1.39032	0.637511	1.11518	1.17295	1.56436	1.65884	1.37482	1.34825	1.80119	1.37589
NaN	NaN	55.5093	4.9687	NaN	32.1875	NaN	24.9109	NaN	NaN	NaN	NaN	NaN	48.2742	NaN	NaN	NaN	NaN	NaN	NaN	NaN	NaN	45.2858	NaN	140.992	NaN	51.496	41.4577	NaN	9.02935	NaN	NaN	NaN	NaN	NaN	NaN	NaN	13.1036	NaN	NaN	NaN	57.8704	NaN	NaN	6.03464	1.18872	NaN	10.8458	NaN	NaN
NaN	NaN	1.48626	NaN	1.48355	2.05305	NaN	NaN	1.90858	NaN	NaN	2.37988	NaN	1.19074	1.64495	NaN	NaN	NaN	NaN	NaN	NaN	NaN	NaN	NaN	NaN	NaN	NaN	NaN	NaN	NaN	NaN	4.63693	NaN	NaN	1.80789	NaN	NaN	1.35659	NaN	NaN	5.5701	NaN	9.2885	1.56924	NaN	NaN	NaN	3.31554	5.32198	NaN
0.998502	0.737083	0.729341	0.847027	0.79713	2.5892	0.231032	1.35516	0.572475	0.530814	0.6027	0.658588	0.870701	0.990197	1.65752	0.902527	0.968336	1.57965	0.406934	0.875044	0.772141	0.824742	0.932836	1.21401	0.544929	1.01632	0.918358	0.6222	0.763242	0.886368	0.946074	0.704176	0.655609	0.537432	0.525569	0.448009	NaN	0.593683	0.331137	0.356633	0.590982	0.559848	1.25175	2.30463	0.690846	0.906701	1.47693	0.370892	0.768817	0.855139
NaN	0.559409	0.651593	0.523478	0.45208	0.621272	38.466	9.20471	0.244846	4.36129	2.22564	0.444603	0.455768	0.360503	0.424142	4.02414	0.427168	0.385683	0.305474	0.405301	3.75474	0.607201	0.299688	0.275475	0.543478	0.34369	0.390046	0.286664	0.344768	3.25436	0.489884	0.397757	0.322622	0.380938	0.969462	0.332447	0.457875	0.298347	NaN	0.282662	0.303242	2.1661	0.30186	0.243712	0.748783	0.215973	NaN	0.366099	0.278311	1.31829
NaN	NaN	1.53001	0.893176	0.922509	1.10378	NaN	NaN	1.17327	NaN	1.23194	0.896539	NaN	0.493121	NaN	NaN	2.21073	2.68781	NaN	NaN	NaN	NaN	NaN	0.640943	NaN	2.39229	5.44633	NaN	9.24813	4.00545	NaN	NaN	NaN	NaN	NaN	NaN	NaN	NaN	1.72224	NaN	1.08192	3.2911	9.89511	NaN	6.81989	NaN	1.01861	4.08563	NaN	3.17551
0.485531	0.186313	NaN	NaN	0.44285	NaN	NaN	NaN	NaN	1.0476	0.487401	0.483793	0.283591	NaN	0.529409	0.547675	0.752389	0.226834	0.973141	NaN	1.22654	0.382219	0.558597	0.370741	NaN	0.242436	1.09714	1.11879	0.475037	0.556638	0.842176	0.408247	NaN	NaN	0.60584	NaN	NaN	0.643004	NaN	0.338937	0.657895	NaN	0.644247	0.679995	1.04964	1.1736	0.675539	1.54048	1.31487	0.631872
NaN	NaN	NaN	0.708065	0.895656	0.782105	NaN	NaN	NaN	NaN	NaN	NaN	1.36775	NaN	NaN	0.833056	0.920302	0.714082	0.779302	0.400336	NaN	1.25574	NaN	NaN	NaN	NaN	NaN	1.43225	NaN	NaN	NaN	NaN	NaN	NaN	NaN	NaN	1.47984	NaN	NaN	0.753807	NaN	NaN	4.74834	0.982994	1.46214	0.645786	2.52908	1.43713	NaN	NaN
1.7926	1.85839	1.32027	1.2413	1.3619	1.99657	1.13492	NaN	1.82275	1.33606	0.618238	1.96835	1.47822	2.21523	0.979912	0.868734	1.05519	1.06703	1.11901	1.76078	2.08886	1.85567	1.24902	1.6459	1.11179	1.21483	1.37656	1.92909	0.518081	1.62989	1.41834	2.00549	1.5166	1.51169	1.3271	1.78409	3.49382	NaN	1.84352	2.20463	1.99306	1.00739	0.822368	1.41579	2.23694	1.71338	1.03984	2.21636	1.49521	1.74669
NaN	2.90048	2.40258	2.13707	1.11882	3.03398	2.30856	2.41488	2.42595	NaN	2.45327	1.51323	2.06872	2.23889	1.62285	2.00052	2.20357	0.737898	1.18185	1.65145	3.35762	2.1317	2.42542	2.13803	2.29079	2.10066	2.46981	1.41577	1.86008	3.58359	NaN	3.01677	1.81712	3.11799	2.76465	2.64375	1.194	NaN	3.22601	1.76479	2.16614	NaN	2.02564	2.18498	3.0421	2.8034	2.60383	2.09538	3.59945	3.48797
NaN	NaN	NaN	NaN	0.632831	1.75988	0.843739	NaN	1.05188	NaN	0.801218	0.699545	0.575109	NaN	0.884643	1.09486	0.78456	1.10555	0.657419	0.698617	NaN	0.91391	NaN	1.05756	NaN	NaN	1.57208	1.0061	1.53811	NaN	1.48436	1.2745	1.09559	NaN	0.953562	1.66193	NaN	NaN	NaN	0.859919	NaN	NaN	2.41429	NaN	1.24863	0.598372	1.79359	1.15752	NaN	0.947598
NaN	NaN	0.88739	NaN	1.16001	NaN	1.48041	1.09885	0.988435	0.995025	1.37838	1.12272	NaN	1.27264	1.10257	1.24163	0.977231	0.683667	NaN	1.18509	2.87307	1.55318	1.0227	0.876117	1.93345	NaN	1.36926	1.05766	1.60444	0.813339	0.962557	1.09824	1.18213	NaN	NaN	NaN	NaN	0.986485	2.03455	NaN	0.82631	NaN	1.6948	1.27525	0.730034	1.04825	NaN	0.77226	0.754774	NaN
NaN	NaN	0.386071	NaN	NaN	NaN	NaN	1.59492	NaN	NaN	NaN	NaN	1.00822	NaN	NaN	NaN	NaN	NaN	NaN	1.25269	NaN	NaN	NaN	NaN	NaN	NaN	NaN	NaN	NaN	NaN	NaN	NaN	NaN	NaN	NaN	NaN	NaN	NaN	NaN	NaN	0.371609	NaN	0.487116	NaN	NaN	0.164644	NaN	NaN	0.115473	NaN
NaN	NaN	NaN	NaN	NaN	NaN	NaN	NaN	NaN	NaN	NaN	NaN	NaN	NaN	NaN	NaN	NaN	NaN	NaN	NaN	2.2817	NaN	NaN	NaN	NaN	1.8203	NaN	NaN	1.98397	NaN	NaN	NaN	NaN	NaN	NaN	NaN	NaN	NaN	NaN	NaN	NaN	NaN	7.15512	NaN	NaN	4.69307	NaN	4.84802	2.68298	NaN
NaN	NaN	NaN	NaN	NaN	NaN	NaN	NaN	NaN	NaN	NaN	2.73478	NaN	NaN	0.815927	NaN	NaN	NaN	NaN	NaN	NaN	NaN	NaN	NaN	NaN	NaN	NaN	1.08038	1.27299	NaN	NaN	12.4614	NaN	NaN	NaN	NaN	NaN	NaN	NaN	NaN	NaN	NaN	NaN	NaN	NaN	NaN	NaN	4.74766	9.87849	NaN
1.87614	NaN	NaN	NaN	NaN	1.16298	2.27195	NaN	NaN	1.79048	NaN	NaN	NaN	NaN	NaN	NaN	NaN	NaN	NaN	NaN	NaN	NaN	NaN	NaN	NaN	NaN	NaN	NaN	NaN	4.32507	NaN	NaN	NaN	NaN	NaN	NaN	NaN	NaN	NaN	NaN	NaN	NaN	NaN	NaN	NaN	3.70934	NaN	NaN	NaN	NaN
0.72427	0.228425	0.219168	0.140493	0.457122	0.533703	0.0864006	0.106066	0.686342	0.820008	0.81706	0.755801	0.138362	0.341355	0.309905	0.306636	0.876655	0.561577	0.558659	0.113987	0.587096	0.892777	0.670511	1.03343	0.137646	0.161606	0.710884	0.560852	0.284212	0.709874	0.673083	0.848392	0.531152	0.589275	0.849329	0.598158	0.529493	0.753125	0.100412	0.419956	0.642385	0.49087	0.0332546	0.701262	1.07267	0.717669	0.993838	0.598122	0.571527	0.938879
1.16663	1.10712	0.924813	1.43499	1.54751	0.845023	1.01982	0.889363	1.02501	4.72992	1.1205	1.15959	1.41263	0.971157	0.958773	1.07426	0.726955	1.1667	1.62877	0.897827	1.36996	0.681896	0.936768	0.854409	0.834028	1.22669	1.00866	1.03497	1.22543	0.9996	1.39995	0.989903	0.728332	1.1282	0.849329	0.719839	0.619924	0.78064	1.26579	1.0526	1.00921	0.349394	0.869112	0.786658	1.16776	0.700476	1.25164	1.05799	1.21694	0.930233
0.275399	0.359855	0.136249	0.147288	0.0402625	0.292116	0.107232	0.906618	0.210398	0.0276763	0.101886	0.156331	0.186275	0.215401	0.0851571	0.240119	0.0656901	0.0778937	0.120184	0.245718	0.0853315	0.0842318	0.250194	0.078284	0.227946	0.376223	0.0118607	0.219327	0.110097	0.902527	0.345985	0.37154	0.406141	0.151032	0.125661	0.368202	0.277446	0.141977	0.372634	0.409803	0.110251	0.395304	0.331565	0.0681989	0.134931	0.134381	0.0361873	0.189491	0.160272	0.437503
1.57463	1.16498	0.969838	0.555772	0.700771	5.88062	0.850702	1.95225	0.816393	0.568602	0.524164	0.681663	4.24448	2.7533	3.57897	0.37103	0.500225	1.33442	0.877809	1.49999	0.67861	0.671456	13.5597	1.11778	0.650957	0.684369	0.212058	1.44275	2.06526	3.6974	2.41342	0.826515	0.975991	0.956023	0.603209	2.18226	1.36115	0.78883	2.7303	2.62495	1.84983	1.14675	4.35464	4.04645	0.812084	11.1271	2.53627	2.64354	1.43796	1.0195
0.829944	0.96918	0.656211	1.23816	0.969932	1.0761	0.924898	0.915583	0.68738	0.64658	1.05361	0.819068	0.668628	0.63012	0.7503	1.0941	0.824674	0.562114	0.854555	0.771069	1.26231	0.95057	4.53906	1.07312	1.24491	0.993344	1.5454	1.13314	0.829738	0.895897	1.2943	0.774713	1.08092	0.895817	1.39805	1.75633	0.777061	0.919287	0.753125	0.759936	1.95053	0.946432	1.85192	0.776096	1.54342	2.19867	1.25134	1.01329	1.22305	1.81068
1.45207	1.10511	1.28482	0.948137	1.37484	1.6257	1.11281	1.28492	1.23545	1.3123	1.17775	1.03623	1.30273	1.3494	1.22683	1.22977	1.34501	1.30933	1.31301	1.6973	1.25475	1.14047	0.909422	0.984543	1.49013	1.4075	0.908843	1.07423	1.79183	1.09932	1.87238	1.1151	1.08723	1.30392	1.20204	0.862218	1.58273	0.927128	1.02121	1.17937	1.13792	1.23306	1.14193	1.16458	0.937734	1.96595	1.02667	0.876655	0.87512	1.09464
0.856604	0.656814	0.724113	0.639059	1.09587	0.550843	0.951384	0.540249	0.921659	1.60532	1.06623	0.884721	1.04839	0.623636	1.30234	0.969462	1.58894	1.08082	1.18178	0.748391	1.0655	0.782473	0.93668	0.985319	0.768521	0.880592	0.803213	1.02793	1.44707	1.01003	1.156	1.03521	0.678933	0.83647	0.778756	0.723275	0.414886	0.934318	0.667824	0.518296	0.691324	0.341041	0.892857	0.929714	0.861772	0.704871	1.10017	0.736865	0.881135	0.976658
0.440063	0.484379	0.758208	0.855725	0.501354	0.548276	0.418778	0.653125	0.578269	0.344045	0.69377	0.691133	0.607386	0.494927	0.654922	0.960522	0.420309	0.455726	0.45438	0.766284	0.513822	0.585892	0.451243	0.337587	0.404302	0.606244	0.749457	0.459559	1.25707	1.2367	0.89214	0.369781	0.391711	0.31173	0.396794	0.761499	0.311944	0.305372	0.659848	0.345877	0.562841	0.301441	0.933358	0.554109	0.234077	0.590563	0.683854	0.454607	0.279259	0.530082
0.68899	0.542947	0.222099	0.520535	0.627471	0.236703	0.465831	0.476963	0.848536	1.69924	0.820008	0.947418	0.632351	0.416285	0.70492	0.714439	1.07436	1.03504	1.28637	0.639959	0.68157	0.545881	0.615688	0.734538	0.258819	0.441989	0.930752	0.669075	1.50909	0.615006	0.958405	0.580518	0.670017	0.511692	0.488401	0.211475	0.247194	0.655179	0.134468	0.448894	0.538503	0.43033	0.515943	0.664187	0.558659	0.581903	0.66921	0.588339	0.633673	0.765404
1.89505	1.12383	1.33005	1.85336	1.4075	1.26502	1.00875	0.983091	1.54928	1.42225	1.28806	1.3532	1.71809	1.32459	1.45368	2.25139	1.39807	1.57769	1.44548	1.64715	1.0395	1.14115	1.08136	1.31916	1.14643	1.285	1.15019	1.18864	1.5615	1.54048	1.60576	1.57287	1.11293	1.13574	1.23276	1.6578	0.716949	1.02972	1.22948	0.86949	1.17756	0.716384	1.14683	1.56922	1.36153	0.955749	1.46154	1.06783	1.14779	1.10641
0.547945	1.14223	1.91157	0.427972	NaN	1.21763	0.864379	NaN	0.801475	NaN	1.05538	0.80186	0.758553	1.10988	1.10495	1.05509	1.30531	1.44932	1.10902	0.793525	1.06736	1.31234	1.22838	0.903179	1.02068	1.05342	1.08176	1.1414	1.24377	1.46092	NaN	1.19057	1.30234	1.05735	1.54818	0.924471	NaN	0.851571	1.29902	0.875044	1.71253	NaN	0.960061	1.24964	NaN	1.6073	1.91278	1.5075	1.531	1.17637
6.57073	1.57851	0.806647	1.46052	8.16993	1.86529	1.25726	NaN	9.30406	0.951294	0.897022	NaN	NaN	0.995025	17.8069	0.55639	0.661551	NaN	NaN	0.667334	0.88881	NaN	1.33808	1.17459	0.977135	0.609756	0.458379	1.00534	0.74096	1.09776	NaN	NaN	1.10963	0.842105	8.50919	12.0104	NaN	NaN	0.719114	9.05551	5.22739	NaN	NaN	0.767578	1.36136	7.03977	2.04386	2.28352	8.69943	NaN
NaN	NaN	52.1866	7.51089	NaN	79.5102	NaN	232.099	NaN	11.4628	9.85902	5.91436	NaN	26.0288	NaN	NaN	NaN	6.65071	NaN	65.4236	NaN	23.3869	NaN	16.5437	250.532	19.9625	NaN	NaN	NaN	NaN	NaN	NaN	NaN	111.987	29.5029	42.0557	NaN	82.0816	NaN	NaN	NaN	28.7579	16.4449	69.7983	143.526	NaN	36.7931	125.326	NaN	NaN
1.60141	0.749906	1.85756	0.974754	1.53353	1.59203	0.441306	1.15386	2.04015	2.55415	1.34966	1.7347	2.12148	1.70599	0.920556	0.83949	1.33815	1.39346	0.949938	1.07691	1.96889	2.31476	1.89308	2.4182	0.948317	1.6204	1.77715	1.5295	1.39987	2.25989	NaN	2.03786	1.3177	2.66085	2.37846	2.20897	0.54933	1.53123	2.15731	1.1652	1.58728	NaN	0.726744	2.6322	2.20517	1.25384	3.12715	1.59182	2.23229	1.97398
561.924	779.241	5884.78	1007.3	213.179	2436.47	4608.51	3088.52	1560.09	1739.55	345.507	347.391	4842.61	1024.1	1195.66	1839.38	163.969	654.622	198.208	807.689	NaN	2018.12	31.8289	1504.62	4233.34	1443.98	620.27	1050.11	1841.25	NaN	662.778	104.67	374.027	56.8376	2019.88	1731.66	1208.26	2064.24	854.482	747.831	117.317	15701	1941.03	386.862	356.913	182.405	1066.64	145.165	574.878	343.218
NaN	0.464533	0.35471	0.575242	0.337963	0.540862	NaN	NaN	NaN	NaN	NaN	0.298837	0.478217	0.348736	0.45529	NaN	0.740796	NaN	0.400368	0.459432	0.647207	NaN	NaN	0.456225	0.422636	0.439309	NaN	NaN	0.387702	NaN	NaN	0.284115	0.464296	0.347331	0.218665	0.534759	NaN	NaN	NaN	NaN	0.318735	NaN	0.342724	0.66335	0.29865	0.27398	NaN	NaN	NaN	0.658631
0.589623	NaN	NaN	NaN	0.82149	0.88199	0.292946	NaN	NaN	0.497983	NaN	1.09446	NaN	NaN	0.571951	0.464533	0.697399	0.742776	0.70082	0.576469	NaN	0.695701	3.55379	NaN	NaN	1.08274	0.740576	0.73346	1.01706	0.776036	0.968429	0.761499	1.11938	NaN	1.3391	1.72153	NaN	NaN	NaN	0.384246	NaN	0.476122	1.30336	NaN	0.877116	1.28207	2.84544	1.47059	1.31442	NaN
23.5571	NaN	NaN	6.74036	NaN	28.0915	NaN	382.292	NaN	NaN	NaN	NaN	NaN	NaN	5.30195	24.4918	NaN	17.6516	NaN	7.82718	NaN	7.34484	NaN	33.5031	45.0857	NaN	NaN	NaN	6.99105	NaN	46.8911	62.9327	9.29973	31.6416	18.2752	NaN	NaN	NaN	NaN	11.5435	NaN	162.52	NaN	NaN	32.9946	NaN	NaN	NaN	67.0871	99.6711
0.966838	0.668896	1.18436	1.1622	1.19947	0.825627	0.664496	0.657808	0.68451	0.928247	1.45936	1.18322	0.806192	0.860733	1.33924	1.08007	1.18756	1.18869	1.70337	0.866326	1.02619	0.648298	0.691754	0.953743	0.581564	0.741455	0.938174	0.652401	1.64444	1.02331	1.48196	1.0422	1.02836	0.940822	0.755572	0.554754	0.515198	0.622394	0.567666	0.61885	0.818264	0.382044	0.704672	0.826173	0.949577	0.773934	0.866476	0.84832	0.869792	0.982801
2.66064	3.80199	3.52858	2.61643	2.14037	2.63651	4.24881	1.45832	2.775	1.40853	8.04764	2.31219	3.18735	3.431	4.59643	2.9671	1.89261	2.25083	4.92611	3.0165	2.89084	8.17595	6.61376	3.56901	2.06007	4.49256	1.85161	3.2872	1.33736	2.28634	2.90698	2.76893	7.13623	3.10588	4.89908	4.82859	3.43879	5.50206	2.83214	3.03721	4.87139	3.23133	1.96877	4.07515	5.87096	5.0449	2.92346	4.97043	4.35047	2.71636
1.45618	1.25124	0.906372	1.63765	1.52506	1.70233	1.07175	1.00844	0.760109	0.982608	1.13389	1.23565	1.19606	0.791703	1.66661	2.40489	1.27329	1.62069	0.519211	1.20434	0.909422	1.42918	1.28113	1.42796	0.832917	0.924044	0.843953	1.10433	1.4689	0.789453	1.15276	1.06672	0.703532	0.961261	0.931099	1.08171	1.12318	0.810438	0.973047	1.13775	1.31947	0.406537	3.34213	1.15516	0.750751	1.62174	1.36687	1.03967	1.04941	1.03261
2.21352	1.6394	1.33878	1.58356	2.7835	2.14837	2.09367	1.7331	1.79966	0.916422	2.02827	2.21926	0.837241	2.20809	1.74155	1.01538	2.41826	3.00409	1.49757	1.96213	1.26201	2.33956	2.75854	2.52213	1.8352	1.78635	1.86175	1.65226	1.71483	2.13849	1.73331	3.15348	2.08725	2.13106	3.1248	2.66219	0.864603	2.39848	1.92719	1.43831	1.85804	0.908843	1.20181	3.48736	2.54544	1.69374	3.11526	3.09215	3.94664	3.10405
0.72685	0.982222	0.534817	0.617475	0.862441	0.614402	0.606833	0.533675	0.473082	0.51843	0.945001	0.869036	0.863409	1.05378	1.30244	0.297708	0.806907	1.30745	1.35514	0.460003	0.505638	0.512033	0.55894	0.75392	0.71053	0.796178	0.60698	0.754262	1.481	1.05955	0.377031	0.478858	0.545375	0.57205	0.925241	0.413189	0.62383	0.603355	0.725374	0.54606	0.660327	0.643915	0.520048	0.554201	0.698275	0.690131	0.639059	0.481232	0.46503	0.495025
0.273778	0.222504	0.313676	0.419094	0.0947688	0.417693	0.18318	0.354095	0.202302	1.16919	0.160177	0.138671	0.36846	0.253685	0.226326	0.282366	0.125698	0.168939	0.12449	0.350926	0.285747	0.187889	0.257838	0.345782	0.385788	0.30338	0.292723	0.210376	0.109043	0.330317	0.351976	0.196402	0.129364	0.200188	0.239034	0.133967	0.302994	0.200739	0.112468	0.166157	0.16057	0.543419	0.190172	0.174119	0.305558	0.09802	0.202216	0.121149	0.156855	0.172061
3.49406	2.46865	6.20424	3.26968	1.7331	8.40548	2.75908	8.28569	2.67094	2.13406	1.92801	2.86098	3.01668	2.6395	4.49863	3.30535	2.52481	4.12286	1.55972	2.21641	1.94939	3.6622	3.93128	3.33823	3.59273	1.56313	1.73995	1.79633	2.80348	3.46933	5.08078	3.41087	2.16314	3.2476	2.63651	1.39412	1.83611	2.62923	1.67954	1.92961	2.43558	1.58882	2.32347	2.3304	2.10899	1.82849	2.31621	1.98985	2.69426	3.7442
0.785978	0.541565	0.625313	0.675083	0.862366	1.07259	0.577601	0.803342	0.659979	0.604778	0.708818	0.670556	0.716281	0.508337	0.649984	0.784314	0.998004	0.654664	0.95648	0.582547	0.732011	0.507691	0.823181	0.724743	0.879044	0.544218	0.729554	1.10226	1.04569	0.759071	0.936944	0.513163	0.659022	0.458716	0.611696	0.459031	0.643542	0.792581	0.718442	0.447227	0.57501	0.621079	0.797575	0.468516	0.681431	0.719683	0.66569	0.753125	0.64704	0.728014
0.807037	1.00186	0.653552	0.715001	0.798594	1.21014	0.758783	1.11571	1.279	0.869943	0.911162	0.87382	0.958957	0.776096	1.04161	1.05916	0.928419	1.0119	1.23367	0.963762	0.872905	0.722074	0.924214	1.10784	1.08022	1.02712	0.897183	0.958405	1.05242	0.81626	1.40617	0.879275	0.743494	0.866701	1.02087	0.85317	0.665115	0.809782	0.767224	0.777363	0.830703	1.04792	0.883783	0.858738	1.05703	0.828706	0.995421	0.80289	0.87727	0.876347
1.44609	1.13089	1.23467	0.734268	2.91299	1.4534	1.01294	1.07009	2.36038	2.05842	2.12188	2.08177	0.986583	2.30595	1.80063	1.06329	2.39252	3.73427	1.7239	0.976658	1.57741	2.18522	3.38604	2.46354	1.06082	2.48102	1.7199	1.81865	1.84386	2.54414	1.44909	3.05409	2.12712	2.13493	2.61753	2.34077	0.855139	2.60988	0.885269	1.35955	2.03285	0.904814	0.949487	2.98508	3.04971	2.25825	3.29446	3.04906	3.76534	2.93032
0.418936	0.458695	0.382307	0.512899	0.598229	0.307267	0.383509	0.422315	0.32305	0.393794	0.598444	0.744435	0.490846	0.539054	0.747943	0.878194	0.55537	0.577001	0.504007	0.469594	0.372828	0.375319	0.332856	0.424448	0.419305	0.485956	0.55732	0.532028	0.684088	0.468933	0.568085	0.397314	0.27474	0.417955	0.217912	0.425514	0.564079	0.232937	0.263186	0.413719	0.673129	0.317642	1.21947	0.43518	0.485366	0.344828	0.721553	0.318745	0.261993	0.329652
0.483489	0.551481	0.595699	0.430942	0.342736	0.614326	0.462278	0.642839	0.349919	0.495491	0.487972	0.459686	0.67792	0.579811	0.717669	0.500726	0.483325	0.610799	0.4997	0.547615	0.47152	0.672088	0.535619	0.780579	0.431295	0.523725	0.515597	0.874202	0.522357	0.672721	0.605437	0.525182	0.365564	0.485154	0.403649	0.505331	0.83375	0.516929	0.406636	0.706714	1.13827	0.672269	2.07271	0.823316	0.542182	0.852515	1.10418	0.943931	0.5506	0.495246
NaN	30.7238	NaN	16.905	NaN	72.8597	NaN	NaN	12.5441	NaN	NaN	11.3042	NaN	16.6257	NaN	NaN	NaN	NaN	NaN	NaN	NaN	17.9717	NaN	11.4002	NaN	NaN	17.8498	NaN	NaN	18.8711	22.9827	NaN	NaN	NaN	50.5459	NaN	NaN	NaN	NaN	NaN	NaN	20.6211	NaN	NaN	NaN	NaN	NaN	NaN	NaN	NaN
NaN	NaN	2.27682	1.14203	1.35439	0.795925	0.766049	NaN	1.2965	1.08964	1.07868	0.915583	NaN	0.766695	1.27317	2.15633	1.26379	1.00776	1.42432	1.11822	NaN	0.581091	1.1021	0.535504	2.97177	1.34814	0.859328	1.06452	1.28715	1.14325	1.02772	0.970403	0.701508	0.837731	0.629366	1.19534	1.35842	NaN	1.26258	0.646245	0.746491	NaN	0.812612	1.10526	0.813339	0.809848	0.916254	1.01419	0.886054	1.02526
0.808473	0.755687	0.44405	0.918695	1.17945	0.661813	0.706514	0.519265	0.786844	1.13512	1.33397	0.618659	0.859623	0.559535	1.15709	0.990884	1.20667	1.03268	1.08157	0.819605	1.06584	0.707814	0.894374	0.757691	0.52776	1.15076	0.659152	1.3055	0.891583	0.92115	1.03449	1.22269	0.791891	0.731101	0.649773	0.483185	0.499201	0.694782	0.468472	0.566604	0.700869	NaN	0.427771	0.727008	0.925497	0.792707	0.789765	0.840689	0.850702	0.771069
1.73202	3.44163	2.3586	3.19673	4.74338	1.94515	2.9873	2.42037	2.79728	1.66096	2.2899	1.708	1.98649	3.46248	3.18086	2.17094	2.97203	3.29066	2.39378	3.25722	4.31313	3.97551	1.27951	7.05219	3.53182	3.36553	3.62345	2.85087	2.51819	2.35899	0.754603	4.54649	4.32994	3.90717	3.65617	2.5503	1.79604	5.31208	3.71002	2.45116	4.48773	NaN	2.10735	4.67639	4.30589	1.48443	3.87132	3.71581	5.17786	5.20752
NaN	NaN	NaN	NaN	NaN	NaN	NaN	NaN	NaN	NaN	NaN	3.43714	NaN	NaN	NaN	NaN	NaN	NaN	NaN	NaN	NaN	2.95334	NaN	NaN	NaN	NaN	NaN	NaN	NaN	5.96338	5.70744	NaN	12.5433	NaN	2.97743	NaN	NaN	NaN	NaN	16.5038	NaN	18.4271	NaN	5.73592	4.7895	NaN	NaN	NaN	8.31601	7.18288
1.64298	1.57421	1.06986	0.793399	2.02766	1.92708	0.961723	1.80193	1.36314	NaN	1.38617	2.22886	2.40246	1.96025	3.09933	1.67378	1.44259	1.18878	1.37272	1.93293	NaN	1.64055	2.22841	1.27463	NaN	2.07982	1.62639	2.3083	1.79927	2.85299	NaN	2.21185	1.97398	1.80773	2.3731	NaN	1.13958	2.13693	1.33811	2.24992	2.74846	NaN	1.41922	1.77022	2.5113	2.03463	1.77636	1.97122	1.12569	1.74957
0.663174	1.15692	0.929454	1.01904	1.13607	0.680041	NaN	NaN	1.01883	1.36309	1.23445	1.24941	0.739153	0.881368	NaN	1.07771	1.2687	1.06753	0.876962	0.868282	1.29749	NaN	1.11561	0.53859	0.747943	0.867378	1.04904	0.607054	1.34936	0.962649	0.852515	0.423173	1.00727	0.936944	2.80285	NaN	2.43653	NaN	0.588166	0.68686	0.804764	NaN	0.923531	0.93633	0.736594	0.750188	0.744823	0.702889	0.925497	0.619042
13.3795	NaN	NaN	NaN	3.28666	NaN	15.1483	NaN	9.40557	NaN	29.7477	4.6834	NaN	5.2815	3.79392	3.51173	11.5257	NaN	76.558	1.78298	16.9087	66.2032	38.3274	20.3132	NaN	15.1462	24.046	27.7308	NaN	NaN	NaN	45.9031	NaN	26.5604	6.71321	21.3033	9.22765	47.7874	14.8377	138.082	24.7091	NaN	85.1064	13.5971	38.7087	28.3624	25.1769	120.16	6.2282	36.6086
0.342853	0.311274	0.115828	0.326936	0.200212	0.0936768	0.141939	0.187445	0.183321	0.443498	0.468516	0.387612	0.283776	0.206919	0.402253	0.515597	0.598229	0.465398	0.503119	0.423173	0.424827	0.339328	0.30539	0.33173	0.156509	0.170718	0.453022	0.273187	0.46581	0.234907	0.363016	0.33173	0.231401	0.134317	0.331851	0.153386	0.147184	0.23265	0.137639	0.159737	0.222593	0.392357	0.134115	0.30003	0.318847	0.204361	0.312256	0.154859	0.234869	0.480954
1.66304	0.730887	0.518135	0.671096	1.41323	1.48474	0.841184	1.01364	1.30292	1.93196	1.25136	1.07685	1.16943	0.77912	1.3453	0.933881	1.23993	0.609496	1.03256	1.43517	1.25025	1.09315	1.09074	0.751823	NaN	0.930925	2.09683	1.17843	1.68973	0.886603	1.43176	1.20434	1.02582	0.8088	0.987752	0.684229	0.404465	0.590528	0.970214	0.832431	0.855359	NaN	0.607644	1.00894	0.816127	1.58816	1.42874	0.819135	0.950661	0.937559
NaN	NaN	2.48114	1.34345	2.45158	1.2089	2.53043	3.4075	0.384069	0.934492	1.58924	NaN	3.26541	2.24937	NaN	1.90328	1.98527	2.17491	NaN	NaN	1.10518	NaN	NaN	NaN	3.65297	1.87424	5.03601	3.15946	4.00513	NaN	2.18426	2.16581	2.73053	4.7112	1.77923	2.57865	NaN	NaN	2.98704	NaN	2.98981	NaN	3.06316	2.83841	NaN	2.56088	3.0409	3.20811	4.31444	2.80717
0.751993	0.436605	0.441969	0.601395	1.16771	2.42507	0.312598	0.545465	2.65463	1.18579	1.06087	1.43794	0.914913	0.696573	0.634276	3.51309	1.21092	0.826037	1.28564	0.3885	4.83465	0.646956	0.975039	1.0287	0.643708	0.60241	0.895656	0.921489	0.984349	0.70082	0.799552	0.748335	0.83731	0.846955	0.673355	0.336417	0.627117	0.556297	0.149056	0.765873	0.591156	0.979144	0.402982	0.588824	0.740686	1.44128	0.850268	0.790826	0.759705	0.756659
1.10621	1.2083	0.841255	0.960984	1.09773	0.731101	1.26148	0.979912	1.41215	0.946342	1.15389	1.51089	1.14036	1.66301	1.34822	0.790889	1.08288	1.38003	0.9995	0.973615	1.17048	1.71215	1.47399	1.91267	1.36463	2.10526	1.75694	1.07807	1.06244	0.934492	0.918695	1.70952	1.08501	1.58965	1.42276	1.70605	0.611359	1.67496	1.56287	0.922765	1.33617	0.887705	1.46701	2.40304	1.66168	1.68438	2.17533	1.69454	1.89768	1.82842
1.0301	0.720721	0.65505	0.628062	1.63661	0.72865	1.17077	0.782534	0.87535	1.01715	1.17369	1.08906	1.146	0.706414	1.31563	1.22048	2.19534	0.845309	1.69687	0.981547	0.865277	0.484895	0.654065	0.681292	1.01083	0.808277	0.84317	0.840901	2.50332	1.06997	0.988045	0.8285	1.07638	0.867453	0.492732	0.669075	0.641725	0.909173	0.590633	0.594566	0.774353	0.430422	1.0221	0.858222	0.833403	0.896781	0.826105	0.817929	0.749569	0.913492
1.43289	1.53624	3.91757	1.39059	1.69394	1.19524	2.09899	1.19204	1.91428	1.01884	1.46488	2.06979	1.41707	2.34302	1.39805	1.25412	1.4686	2.3928	1.09441	1.79876	1.07451	2.42113	3.58115	2.31006	1.71954	2.22811	1.83817	1.45347	1.59872	1.13522	1.34622	3.07069	2.34439	2.36916	2.89101	3.04442	0.869263	1.87737	2.1691	1.02477	1.75664	1.25265	2.13306	3.46177	2.24004	2.81992	3.87837	2.28974	3.45089	2.29996
4.91715	1.94549	2.46445	1.20485	1.51992	1.33718	2.20707	2.47905	2.07452	0.204503	3.52746	0.808081	0.309722	2.12062	3.51482	1.0555	1.27974	1.83422	1.4206	1.9324	7.21657	4.82509	1.00915	3.95663	4.21124	2.26876	7.503	2.76129	0.459137	0.684885	1.8209	6.63174	2.57745	2.77832	4.0517	1.32352	2.65604	1.98153	1.01109	2.0996	2.63262	4.65636	4.14663	9.65904	1.69693	2.04645	12.7066	1.43219	3.54748	14.2472
0.497463	0.217335	0.211761	0.584522	0.774054	0.274138	0.439232	0.273815	0.31142	0.67815	0.588789	0.699545	0.439541	0.233639	0.424953	0.80289	0.679948	0.679856	0.972763	0.56262	0.773096	1.43029	0.439367	0.72427	1.60298	0.46705	0.587406	0.556112	0.794155	0.238555	0.704771	0.483255	0.534245	0.522794	0.41934	0.233678	0.248571	0.276419	0.271267	0.573756	0.569671	0.382512	0.26322	0.575242	0.594601	0.432246	0.512952	0.710631	0.484567	0.489045
0.168472	0.162673	0.0868206	0.0590319	0.0263908	0.245652	0.063678	0.135604	0.0596944	0.0433952	0.0458337	0.111574	0.183908	0.0823927	0.289452	0.0964972	0.0592452	0.083682	0.0492514	0.175306	0.0402739	0.0387237	1.02088	0.0904241	0.198385	0.0758668	0.0685777	0.126881	0.0586407	0.0960061	0.131579	0.0391282	0.0635971	0.0751146	0.109313	0.122272	0.303472	0.194727	0.13303	0.114381	0.133216	0.205994	0.596801	0.189667	0.140448	0.419094	0.0968054	0.0902201	0.0749232	0.195427
1.12945	1.0936	0.792267	0.878503	1.20163	1.62898	1.01834	0.944822	0.97229	1.13908	0.91416	1.13444	1.13077	0.953653	1.26395	0.929454	0.831739	0.692137	0.9999	1.2726	0.823859	1.0211	1.39768	1.13533	0.918611	1.42142	1.1333	1.14175	1.42552	1.21401	1.0083	0.898957	0.895015	1.04698	0.859919	0.714745	0.666622	0.945895	0.876885	0.824198	0.990491	0.609459	1.08418	1.13542	1.33429	0.992753	1.2791	0.854701	0.88881	0.781555
1.44007	1.85004	1.36851	1.28249	1.14123	1.36765	1.31044	1.14167	1.30346	1.07103	1.71512	0.980008	0.917936	1.3436	1.10678	0.890869	1.35356	1.1125	1.27567	0.839137	1.67754	1.87164	1.66185	1.54543	2.73433	1.77655	1.21588	2.02086	1.58083	0.849329	1.25927	1.60115	1.8213	1.89894	1.87315	1.3741	1.07309	1.41281	1.21268	1.47007	1.66088	1.38244	1.51272	1.34088	1.66246	1.15611	1.78718	1.67799	2.05402	1.97781
0.618391	0.486334	0.572902	0.396762	0.354497	0.440335	0.305913	0.610501	0.623286	0.419006	0.633553	0.372218	0.46657	0.591961	0.55417	0.548095	0.564143	0.600601	0.533476	0.466875	0.453104	0.592382	0.766342	0.939408	0.529184	0.502563	0.739864	0.662559	0.550388	0.477304	0.466027	0.72812	0.637755	0.678702	0.551238	0.447968	0.532566	0.810241	0.342079	0.480008	0.761673	0.512742	0.492611	0.740521	0.73062	0.753352	0.829738	0.555895	0.792393	0.804635
0.37358	0.386862	0.487853	0.279673	0.641067	0.466766	0.0465896	0.332072	0.564238	1.09407	0.503271	0.74239	0.0503931	0.514695	0.197033	0.640164	1.25364	0.151094	0.83949	0.048459	0.863782	0.566508	0.743108	0.880514	0.611396	0.468362	0.954654	0.775494	0.61267	0.375912	0.864827	0.563539	0.665159	0.942418	0.70141	0.51488	0.606061	0.641478	0.0444385	0.787464	0.623675	0.961169	0.56224	0.592347	0.764818	0.914662	0.693241	0.882223	0.710833	0.705766
1.43482	1.07856	0.81367	1.25831	1.69903	0.681199	1.21634	0.684088	1.37455	1.95278	1.72855	1.23452	1.20016	0.853024	0.833403	1.63956	2.14592	1.30108	2.75778	1.24462	1.45953	0.822504	1.06211	0.874661	1.03353	1.0516	1.10239	1.44071	1.76613	0.669031	0.887075	1.17364	1.21253	1.26595	0.910747	0.824946	1.23871	0.95813	1.2866	1.09305	0.95338	0.685354	1.50666	0.998004	1.03872	1.10358	1.14277	1.00047	1.05339	1.12761
1.01365	0.916926	0.878117	0.924044	1.59342	0.788146	0.821086	0.848464	0.994926	1.17578	1.12337	0.986193	1.01534	0.881679	0.803084	1.029	1.14299	0.865951	1.15364	0.929368	1.17898	0.825491	0.796622	1.02666	0.998502	0.76746	1.13182	0.778574	1.26159	1.0685	1.16577	0.98668	0.814664	0.989022	0.783638	0.640205	0.857412	0.787216	0.887233	0.930752	0.845595	0.623597	0.922509	0.955292	0.924984	0.756487	0.896138	0.95057	0.844309	0.918105
NaN	NaN	NaN	NaN	NaN	NaN	NaN	NaN	NaN	NaN	NaN	NaN	NaN	NaN	NaN	NaN	2.04759	NaN	1.28371	NaN	NaN	NaN	NaN	NaN	NaN	0.733783	1.22173	NaN	NaN	NaN	NaN	NaN	NaN	0.688184	NaN	NaN	NaN	NaN	NaN	NaN	0.653168	NaN	0.939496	0.429867	NaN	1.111	NaN	NaN	NaN	NaN
NaN	NaN	NaN	NaN	NaN	NaN	NaN	NaN	NaN	NaN	NaN	NaN	NaN	NaN	NaN	NaN	NaN	NaN	NaN	NaN	0.574152	NaN	0.612295	0.263296	NaN	1.5344	NaN	NaN	NaN	0.646789	NaN	NaN	NaN	NaN	NaN	NaN	NaN	NaN	NaN	NaN	1.3123	NaN	NaN	NaN	NaN	5.66572	3.57028	3.61716	NaN	NaN
21.6661	25.3088	11.208	14.7951	14.2851	5.25928	23.5793	12.6264	25.0758	57.4911	6.85542	8.1057	6.73991	12.3472	NaN	23.8994	8.39631	22.2148	20.642	1.82522	NaN	5.55833	12.813	15.9561	22.2742	NaN	17.7333	33.769	8.1493	11.333	2.92227	12.0967	31.5726	126.016	36.0633	16.3127	199.545	20.2466	18.6727	97.5419	36.6744	29.385	8.43313	11.8778	46.1361	15.9528	13.8583	25.4809	31.2168	5.27872
8.65276	3.59673	4.81881	NaN	3.329	7.80579	17.7409	7.03284	4.04973	NaN	8.23655	8.89284	5.53312	NaN	9.0375	14.2955	NaN	16.5928	9.21999	NaN	0.508492	16.2967	28.6279	22.9468	2.29048	NaN	NaN	25.2672	9.83381	16.7017	5.0015	6.33152	8.00384	2.35655	NaN	16.719	31.9969	12.7592	8.25355	37.669	38.4689	5.20156	92.2935	57.2181	8.59328	67.944	23.0862	66.1463	8.71612	7.4912
3.5643	3.66086	6.39141	3.17481	2.9777	1.2148	2.20931	2.62158	3.44151	5.57693	3.47947	3.52983	2.54621	19.0233	1.19118	1.48485	1.08981	0.855359	6.4487	2.73284	1.31619	8.16993	1.29054	1.88797	0.977231	1.43635	1.69808	0.910747	1.35624	1.97344	1.26365	1.78559	2.08221	2.02265	2.63699	1.54105	1.58391	0.977231	1.71133	1.48816	1.38238	1.16413	1.13308	1.42892	2.15541	1.68836	1.66778	1.00477	0.854628	2.08407
0.477373	0.295753	0.351161	0.359764	0.168993	0.987557	0.450106	0.417973	0.578469	NaN	0.305708	0.306026	0.345746	0.467902	0.594919	0.310174	0.365644	0.610389	0.301541	0.240373	0.223055	0.412014	1.30432	0.834724	1.40131	0.466788	0.604193	0.573197	0.28538	0.445752	0.914495	0.670871	0.394166	0.353357	0.57468	0.333711	0.332568	0.692569	0.356671	0.314673	0.30756	0.42187	0.866927	0.704374	0.856751	0.650745	0.965437	0.531152	0.948857	0.785793
2.40877	NaN	NaN	NaN	2.17974	NaN	2.16699	NaN	NaN	NaN	1.72022	1.52781	NaN	NaN	2.64389	NaN	NaN	4.97488	2.74108	NaN	NaN	4.2061	3.73832	2.95116	1.31385	1.86355	NaN	2.72346	3.87582	NaN	NaN	NaN	2.30134	2.2667	3.15666	11.1674	NaN	NaN	NaN	NaN	3.2714	NaN	4.28449	2.19539	4.02317	5.24027	3.90061	3.24675	2.49066	NaN
NaN	NaN	NaN	NaN	NaN	NaN	NaN	0.416858	NaN	NaN	NaN	NaN	NaN	NaN	NaN	NaN	1.05395	NaN	NaN	NaN	0.985999	NaN	NaN	0.450796	0.546329	0.7373	NaN	0.932662	0.463714	NaN	NaN	NaN	0.466179	NaN	0.455539	NaN	NaN	0.434047	NaN	NaN	NaN	NaN	NaN	0.289101	NaN	NaN	NaN	0.598194	0.660807	NaN
1.59757	1.68577	1.51428	1.22426	1.64652	1.4256	1.83527	1.40217	2.36144	1.5305	1.59112	2.02671	2.19964	2.70533	1.49154	0.635284	1.35302	1.14488	0.904568	1.64125	1.96754	3.2352	3.42677	2.54226	1.82209	3.20636	1.65393	1.61168	1.36543	1.19033	1.47691	2.05668	1.76569	2.26459	2.53846	2.69891	1.31031	2.9808	4.50816	1.48028	1.71157	1.06424	1.77425	3.73218	2.29048	2.83712	4.23352	2.22247	2.33111	2.43297
0.923191	0.552181	0.658068	0.664011	1.15934	0.690179	0.787092	0.586338	0.901388	0.988338	0.904159	0.997705	0.884486	0.615044	0.806842	1.24439	1.03559	0.806972	1.14108	0.819605	1.05747	0.786225	0.776518	1.00658	0.530757	0.837731	0.961446	0.878349	1.30768	0.693481	0.788768	0.847314	0.689037	0.885583	0.648971	0.51784	0.627549	0.933358	0.801475	0.75959	0.779606	0.584898	0.79694	0.983187	0.771188	0.736106	0.802053	0.703284	0.869036	0.959509
0.604924	0.591716	0.498157	0.432171	0.304618	0.497364	0.224962	0.427515	0.417258	0.292612	0.380793	0.417153	0.442517	0.550661	0.438346	0.476667	0.367134	0.347029	0.438385	0.635405	0.565835	0.627628	0.713318	0.557476	0.560193	0.333156	0.54618	0.405597	0.299958	0.58401	0.598337	0.516983	0.474158	0.421212	0.802826	0.306579	0.471498	0.498057	0.729714	0.273883	0.449458	0.427606	0.381534	0.486926	0.607496	0.462086	0.762602	0.514721	0.481788	0.727061
NaN	NaN	NaN	NaN	0.820277	0.776699	NaN	NaN	NaN	0.497142	0.924813	0.896298	0.332436	NaN	0.781067	0.590598	0.874202	1.09621	0.682361	0.676178	0.518027	1.44569	1.38286	1.51701	NaN	0.790826	NaN	0.873363	1.03635	NaN	1.19182	0.886054	0.505587	0.911411	0.931793	0.877578	NaN	1.0323	0.726586	1.13903	1.10906	1.74025	0.4281	1.01761	1.10441	1.21712	1.33563	1.51738	1.20295	1.35617
NaN	NaN	0.947059	3.95257	NaN	NaN	NaN	NaN	1.37561	29.4994	NaN	4.3057	NaN	NaN	1.48247	NaN	NaN	0.43122	1.31697	NaN	NaN	6.16409	NaN	NaN	NaN	0.774833	NaN	NaN	NaN	1.04307	1.09135	1.29166	NaN	NaN	0.410644	NaN	1.01234	1.12001	NaN	NaN	NaN	NaN	NaN	NaN	NaN	NaN	NaN	NaN	NaN	2.1609
0.717618	0.565995	NaN	0.484402	1.18039	0.287985	0.682547	0.783147	NaN	0.250031	0.797385	0.65368	0.348955	0.775855	0.822301	0.588963	0.55701	0.4649	0.6595	0.261438	0.573263	0.65066	0.617703	0.745268	0.526759	0.499501	0.360412	0.812678	0.366394	0.372731	0.631592	0.477281	0.656211	0.827883	0.399297	0.331466	0.487591	0.329207	0.498107	NaN	0.544425	0.416406	0.803471	0.520129	0.334807	0.331049	0.534874	0.4761	0.561167	0.460893
NaN	NaN	0.375629	0.899928	0.825219	NaN	0.626527	NaN	1.07248	NaN	0.974374	1.42221	0.676911	0.79783	NaN	2.7049	0.70141	NaN	NaN	1.06916	0.254001	0.994135	NaN	0.731904	0.758035	0.650576	NaN	0.70141	0.788519	NaN	1.00478	NaN	0.488759	NaN	NaN	0.936154	0.873591	NaN	NaN	NaN	1.44707	NaN	1.98401	1.16	1.1015	0.622123	1.58564	1.60421	1.63271	NaN
NaN	NaN	2.54194	NaN	2.27485	3.59906	1.78622	2.28279	2.43914	NaN	1.93409	NaN	2.47243	2.71135	NaN	2.28859	3.11352	NaN	NaN	2.11233	NaN	NaN	3.33578	2.75908	1.25732	3.11633	NaN	2.70577	NaN	2.77593	NaN	NaN	2.99823	2.10318	NaN	NaN	NaN	NaN	NaN	1.82993	4.86381	NaN	5.46866	2.99482	2.18632	3.89605	3.65537	3.97994	NaN	NaN
0.665203	0.343489	0.391298	0.640082	0.690369	0.652699	0.323436	0.459095	0.336462	0.481858	0.593719	0.65368	0.537519	0.465441	0.963391	0.814531	0.571004	0.669478	0.861326	0.56478	0.599305	0.233514	0.271658	0.321058	0.316897	0.365898	0.575904	0.437541	0.521132	0.672631	0.679579	0.459453	0.368786	0.481209	0.3632	NaN	0.299536	0.380257	0.321182	0.284754	0.434292	0.262391	0.37733	0.376918	0.509554	0.413479	0.511614	0.427972	0.379377	0.568214
NaN	0.524852	0.540132	0.535848	NaN	1.28693	0.754546	NaN	0.618774	NaN	0.580686	0.632871	NaN	0.930406	1.04192	0.622433	NaN	0.713165	0.398692	0.451263	0.370192	1.65857	1.44452	0.776578	0.670152	0.614779	NaN	0.734214	0.609645	0.538967	0.382614	NaN	0.572574	0.608606	0.893256	1.04242	1.17025	1.28154	1.05602	1.03415	1.19178	NaN	3.337	1.00613	1.05381	0.526233	1.06936	0.74549	2.33149	0.531745
NaN	1.0852	1.27475	2.18905	1.91296	NaN	1.78323	1.08984	1.6086	2.59316	1.49876	2.20848	1.81957	NaN	1.26978	1.52886	1.40135	1.28429	2.57891	1.79769	1.37246	1.04666	1.4104	1.23044	NaN	1.13434	NaN	1.79019	2.2703	1.47903	1.65074	NaN	1.31266	2.27785	1.15178	1.14273	NaN	NaN	0.863036	1.06997	1.55381	NaN	1.47427	1.10313	NaN	1.23277	1.5166	NaN	1.31808	NaN
NaN	NaN	NaN	4.75941	NaN	NaN	NaN	NaN	NaN	NaN	0.69118	NaN	NaN	NaN	NaN	3.50828	NaN	NaN	1.16282	NaN	NaN	1.24945	NaN	NaN	NaN	NaN	7.2469	NaN	5.58909	NaN	6.51721	NaN	NaN	NaN	NaN	NaN	NaN	NaN	NaN	NaN	7.37028	NaN	NaN	NaN	NaN	NaN	NaN	NaN	NaN	NaN
NaN	4.01477	5.03728	NaN	NaN	0.427625	3.83318	1.34517	0.849762	NaN	0.576601	NaN	NaN	0.128893	0.281057	1.29418	1.43316	NaN	0.401703	NaN	NaN	0.135478	NaN	NaN	NaN	NaN	3.55859	NaN	1.02056	0.585789	0.110133	NaN	NaN	NaN	0.21529	0.312159	1.86379	NaN	NaN	0.706664	NaN	NaN	1.04445	NaN	0.185508	NaN	NaN	0.599592	0.175525	NaN
0.878889	0.718907	0.34965	0.837942	0.996214	0.851426	0.446369	0.855871	NaN	0.360633	1.32308	0.721397	0.225195	0.45977	0.349162	0.627865	0.71347	0.378444	0.767695	0.506047	0.483139	0.429941	0.563095	0.393794	0.399361	0.103933	0.349895	0.18914	0.472947	0.499351	0.455664	0.312666	0.677323	0.598802	0.578469	0.321265	NaN	1.02138	NaN	0.185357	0.305698	0.635042	0.267974	0.414491	0.672495	0.358963	0.130313	0.178247	0.247421	0.282582
0.779788	0.712758	NaN	0.740412	0.930665	0.57501	0.437541	0.671096	0.79139	0.951384	1.40653	1.09279	0.548606	0.845023	0.706764	1.42611	1.17429	1.30799	1.27021	0.392126	0.725111	0.770713	0.974089	1.70812	0.460808	0.948767	1.03476	0.954107	1.40917	0.8923	0.443833	2.05023	0.868734	1.11191	0.740467	1.1763	0.676407	NaN	0.573822	0.992753	1.39525	NaN	1.35602	1.45089	0.987849	1.97064	1.92097	1.55703	1.18138	1.31683
0.726427	0.23839	0.208316	0.652103	0.556855	0.302609	0.277624	NaN	0.407415	0.633192	0.140726	0.437044	0.546926	0.219838	0.727696	0.734646	0.619886	0.436167	0.665868	0.635082	0.539374	0.425206	0.383877	0.642921	0.232488	0.499002	0.53359	0.577801	0.293479	0.425026	0.596374	0.193334	0.473283	0.379521	0.477646	0.2558	0.352746	0.292483	0.215216	0.320328	0.466766	0.232618	0.792017	0.129917	0.555772	0.386294	0.442419	0.357245	0.232051	0.239137
NaN	NaN	0.875274	NaN	3.13696	0.887863	1.30263	1.34579	2.9832	NaN	2.12134	NaN	NaN	2.13247	NaN	NaN	1.81333	2.80049	0.612858	NaN	2.99967	2.00437	1.26341	4.29775	1.65025	NaN	NaN	NaN	1.19481	NaN	2.38192	2.51819	2.23419	2.52659	2.11954	NaN	NaN	1.94394	1.43043	1.70733	1.71447	NaN	1.876	7.00967	7.50244	2.20192	4.46448	NaN	NaN	3.72232
NaN	1.94269	NaN	NaN	2.61274	NaN	NaN	NaN	NaN	NaN	2.72777	NaN	1.52006	NaN	NaN	NaN	2.81889	NaN	NaN	NaN	2.60112	6.63614	3.62924	NaN	NaN	2.02425	NaN	3.76747	NaN	NaN	NaN	NaN	3.14327	3.32502	NaN	NaN	NaN	NaN	NaN	3.80909	3.36247	NaN	NaN	2.94152	NaN	4.97463	NaN	3.76534	NaN	NaN
0.313215	0.252022	NaN	NaN	NaN	0.753012	0.645037	NaN	0.455892	0.495148	NaN	0.593366	NaN	NaN	0.150743	NaN	NaN	NaN	NaN	NaN	NaN	NaN	NaN	NaN	0.2955	NaN	NaN	NaN	0.163506	NaN	0.748167	0.418568	NaN	NaN	0.228139	NaN	NaN	NaN	NaN	1.01561	0.83375	NaN	NaN	NaN	NaN	NaN	NaN	NaN	0.698714	0.531463
NaN	NaN	0.759475	NaN	0.997009	NaN	NaN	NaN	0.562019	NaN	NaN	0.594813	NaN	NaN	0.941088	1.14579	NaN	NaN	0.427606	NaN	NaN	0.944109	0.823588	0.313499	NaN	NaN	NaN	0.827062	0.537086	0.877039	NaN	0.352895	0.485084	NaN	NaN	0.990099	2.40512	NaN	NaN	0.787526	1.1584	NaN	2.70981	0.681803	NaN	0.895576	2.19838	1.39148	1.53388	NaN
2.59148	2.65541	2.61383	2.32851	3.63333	4.13172	2.18938	2.60274	6.66267	1.57011	2.99877	3.72356	2.61199	3.89955	2.79987	1.19127	3.06504	7.97194	1.48074	2.09622	2.23179	7.71129	1.83053	7.79727	3.98422	3.90168	2.30484	2.59007	1.46462	2.39762	1.73169	11.2478	3.20554	6.88231	10.9835	3.86713	1.23547	3.37462	2.50351	2.00208	2.1993	3.9188	1.25033	6.70601	11.7066	2.8696	6.82967	4.55	12.3119	6.68762
0.635203	0.670062	0.599484	0.356049	0.600312	0.345734	0.473306	0.521921	0.666267	0.552792	0.51913	0.530279	0.643915	0.814465	1.24259	0.326009	0.425242	0.49645	0.297318	0.38838	1.36008	0.678656	0.956663	0.83257	0.580889	1.18984	0.869792	0.802182	0.574845	0.588963	0.666089	0.838223	0.642674	0.686813	0.628931	0.349052	0.501178	1.53027	0.659761	0.670781	0.718649	1.04016	0.694541	0.745323	0.91508	0.537866	0.690799	0.602156	0.706215	0.648382
0.639877	1.77406	0.899847	1.36004	0.290546	0.414577	1.03782	0.721761	0.385297	1.0936	1.04616	3.23771	0.609459	0.633593	0.795988	1.1649	0.240431	0.728863	0.891027	1.35562	1.03853	1.69262	0.299823	3.21533	0.377572	0.866626	0.780153	0.510803	0.330349	1.69245	1.37501	0.51219	1.02303	0.271172	0.555741	0.453022	1.0515	0.469638	0.290301	0.645161	0.602446	0.536164	0.318939	0.685166	0.68738	0.408647	1.06355	0.343442	0.483512	0.451712
1.30063	0.387207	0.386847	1.56451	0.765111	0.56494	0.849257	0.870701	0.4054	1.17644	0.846382	0.783392	0.753125	0.512821	0.864304	1.03893	1.40938	0.686436	1.99493	1.28818	0.810964	0.220327	0.39426	0.3707	0.357679	0.555586	0.420787	0.401075	4.90316	0.694059	1.53598	0.774833	0.821693	0.978378	0.222573	0.346308	1.33752	0.315916	0.421053	0.377245	0.295151	0.496007	0.652486	0.3353	0.543331	0.770179	0.487591	0.311935	0.111967	0.958957
2.96147	5.36884	2.55643	2.1101	1.39322	2.48781	1.33772	1.62414	2.98285	0.66107	3.08147	3.46632	1.59003	7.28916	0.77688	0.820345	4.35104	1.01589	1.01481	1.62282	2.64943	4.96796	1.38947	3.65604	3.42994	4.82579	4.93656	2.64725	1.15667	1.65393	2.89704	2.72161	5.08208	2.21445	4.87852	1.03022	4.85649	2.93479	5.06688	3.34605	3.24433	1.60108	1.69664	5.45911	3.67026	3.44187	2.19756	1.4424	2.50244	3.38261
0.24937	0.254343	0.723432	0.603173	0.82447	0.192927	0.293221	0.182973	0.411489	NaN	0.927816	0.547855	0.569898	0.619425	0.328958	0.519859	NaN	1.17534	0.568796	0.306984	0.718597	0.450572	NaN	0.937119	NaN	2.4216	0.73443	0.343595	NaN	0.98561	NaN	NaN	0.524329	0.215499	0.187779	0.817929	0.490388	1.80086	1.89933	NaN	1.5935	NaN	0.413548	0.723537	1.36681	0.873515	0.337268	1.28079	1.48021	0.976753
NaN	NaN	19.1928	NaN	20.3174	NaN	82.3723	NaN	70.9975	17.0961	NaN	19.0531	NaN	245.749	NaN	28.3495	20.3029	13.1664	48.8758	NaN	NaN	320.338	NaN	27.268	NaN	NaN	NaN	18.9663	NaN	23.6217	NaN	NaN	NaN	NaN	126.878	NaN	233.361	254.065	NaN	NaN	57.7101	3011.32	NaN	121.846	30.8252	NaN	NaN	1.96117	182.715	37.1113
1.37682	0.809127	0.453412	0.839419	0.770951	0.745768	1.28652	0.832986	0.60931	NaN	1.1037	0.726744	NaN	0.707564	1.01744	0.633754	0.730087	1.89265	0.902935	0.535332	0.713929	0.737354	1.72461	0.595841	0.877501	1.37815	1.18359	0.900657	1.08017	1.13538	1.26342	1.02366	1.11808	1.02113	1.03616	1.20588	0.735889	0.957671	1.69961	0.524109	0.883002	NaN	0.79713	1.26958	0.731475	1.65925	1.01454	0.877578	0.90082	1.02297
[truncated: 3,610 more rows]
[truncated: 6 more columns]

## Sheet: BEAS-2B Proteome
Control1	Control2	Control3	shACO2-1	shACO2-2	shACO2-3	Uniprot	Protein Name	Gene Name
16.8924	17.0811	17.005	17.0018	17.3125	16.8008	A0A0B4J2F0	PIOS1	PIGBOS1
15.413	15.2379	15.087	15.5067	16.1072	15.79	A0AV96	RBM47	RBM47
23.8793	23.9702	23.99	23.9819	24.0176	24.0096	A0AVT1	UBA6	UBA6
21.8254	21.735	21.8614	22.124	22.1695	22.1954	A0FGR8	ESYT2	ESYT2
[truncated: 6,402 more rows]

## Sheet: H226 In Vitro
Protein names	Gene names	Control1	Control2	Control3	ACO2-up1	ACO2-up2	ACO2-up3
[truncated: 3,467 more rows]

[truncated: 2 more sheets: H226 In Vivo, FeS-related proteins annotated]
