# Supplementary material for: Mitochondrial Aconitase ACO2 Links Iron Homeostasis with Tumorigenicity in Non–Small Cell Lung Cancer
Source: PubMed Central journal article supplement — Mol Cancer Res. 2022 Oct 10;21(1):36–50. doi: 10.1158/1541-7786.MCR-22-0163 (PMC9808373; doi:10.1158/1541-7786.mcr-22-0163), 2022-10-10
Supplement: mcr-22-0163_table_s1_suppst1.pdf [file mcr-22-0163_table_s1_suppst1.pdf]

**Table S1**-Statistical association of clinical and pathologic characteristics with engraftment.

|                                   | Number of Patients     |                        | p-Value (statistical test)      |
|-----------------------------------|------------------------|------------------------|---------------------------------|
|                                   | XG (n=29)              | No-XG (n=23)           |                                 |
| <b>Age, Median (range)</b>        | 67.75<br>(48.65-80.34) | 67.46<br>(47.14-87.95) | 0.67 (Mann-Whitney test)        |
| <b>Tumor size, median (range)</b> | 4.5 cm (1.8-11)        | 4.3 cm (1.4-13.5)      | 0.77 (Mann-Whitney test)        |
| <b>Sex</b>                        |                        |                        |                                 |
| Female                            | 6 (21%)                | 13 (57%)               | 0.01 (Fisher's Exact t-test)    |
| Male                              | 23 (79%)               | 10 (43%)               |                                 |
| <b>Smoking</b>                    |                        |                        |                                 |
| Never                             | 1 (3%)                 | 2 (9%)                 | 0.58 (Fisher's Exact t-test)    |
| Ever                              | 28 (97%)               | 21 (91%)               |                                 |
| <b>Pathologic stage</b>           |                        |                        |                                 |
| I                                 | 14 (48%)               | 11 (48%)               | 0.94 (Fisher's exact t-test)    |
| II                                | 10 (34%)               | 7 (30%)                |                                 |
| III/IV                            | 5 (17%)                | 5 (22%)                |                                 |
| <b>Histologic subtype</b>         |                        |                        |                                 |
| ADC                               | 7 (24%)                | 17 (74%)               | 0.00072 (Fisher's Exact t-test) |
| SCC                               | 19 (66%)               | 6 (26%)                |                                 |
| Other                             | 3 (10%)                | 0 (0%)                 |                                 |
| <b>Grade</b>                      |                        |                        |                                 |
| Well differentiated               | 0 (0%)                 | 3 (13%)                | 0.036 (Fisher's Exact t-test)   |
| Moderately differentiated         | 11 (38%)               | 12 (52%)               |                                 |
| Poorly differentiated             | 18 (62%)               | 8 (35%)                |                                 |
| <b>Inflammation</b>               |                        |                        |                                 |
| Mild                              | 25 (86%)               | 12 (52%)               | 0.021 (Fisher's Exact t-test)   |
| Moderate                          | 3 (10%)                | 5 (22%)                |                                 |
| Severe                            | 1 (3%)                 | 6 (26%)                |                                 |
